# Supplementary material for: SFPQ Directs Histone H3.3 Deposition to R-Loops in DNA Repeats to Protect Genome Stability
Source: Research Square preprint supplement (doi:10.21203/rs.3.rs-5721144/v1), 2025-01-28
Supplement: Supplementary file 1 [file ebee5bc09a224ccf16de4d17.xlsx]

## Sheet: DEGs
ensembl_gene_id	external_gene_name	description	transcript_biotype	baseMean	log2FoldChange	lfcSE	stat	pvalue	padj
ENSG00000001626	CFTR	CF transmembrane conductance regulator [Source:HGNC Symbol;Acc:HGNC:1884]	nonsense_mediated_decay,protein_coding,protein_coding_CDS_not_defined,retained_intron	11.7794	2.29924	0.713692	3.22161	0.00127472	0.00460815
ENSG00000003096	KLHL13	kelch like family member 13 [Source:HGNC Symbol;Acc:HGNC:22931]	protein_coding,retained_intron	291.97	-1.86709	0.136666	-13.6617	1.7203e-42	4.93256e-41
ENSG00000005108	THSD7A	thrombospondin type 1 domain containing 7A [Source:HGNC Symbol;Acc:HGNC:22207]	protein_coding,protein_coding_CDS_not_defined,retained_intron	10.9405	-2.8662	0.806211	-3.55514	0.000377772	0.00150307
ENSG00000007402	CACNA2D2	calcium voltage-gated channel auxiliary subunit alpha2delta 2 [Source:HGNC Symbol;Acc:HGNC:1400]	protein_coding,protein_coding_CDS_not_defined,retained_intron	143.287	-2.07361	0.218602	-9.48578	2.40567e-21	3.47493e-20
ENSG00000007933	FMO3	flavin containing dimethylaniline monoxygenase 3 [Source:HGNC Symbol;Acc:HGNC:3771]	nonsense_mediated_decay,protein_coding,protein_coding_CDS_not_defined	8.4604	-2.22807	0.819531	-2.71871	0.00655368	0.0203855
ENSG00000008118	CAMK1G	calcium/calmodulin dependent protein kinase IG [Source:HGNC Symbol;Acc:HGNC:14585]	protein_coding,protein_coding_CDS_not_defined	22.5747	2.62293	0.549325	4.77482	1.79868e-06	9.83833e-06
ENSG00000008323	PLEKHG6	pleckstrin homology and RhoGEF domain containing G6 [Source:HGNC Symbol;Acc:HGNC:25562]	protein_coding,protein_coding_CDS_not_defined	52.6416	2.56115	0.344901	7.42576	1.12138e-13	1.08913e-12
ENSG00000008513	ST3GAL1	ST3 beta-galactoside alpha-2,3-sialyltransferase 1 [Source:HGNC Symbol;Acc:HGNC:10862]	protein_coding,protein_coding_CDS_not_defined,retained_intron	5035.04	-1.85696	0.0465442	-39.8967	0	0
ENSG00000008517	IL32	interleukin 32 [Source:HGNC Symbol;Acc:HGNC:16830]	protein_coding,retained_intron	299.052	1.65241	0.152898	10.8073	3.17828e-27	5.78583e-26
ENSG00000009694	TENM1	teneurin transmembrane protein 1 [Source:HGNC Symbol;Acc:HGNC:8117]	protein_coding,protein_coding_CDS_not_defined	40.966	-4.42891	0.535594	-8.26915	1.34913e-16	1.55432e-15
ENSG00000010310	GIPR	gastric inhibitory polypeptide receptor [Source:HGNC Symbol;Acc:HGNC:4271]	nonsense_mediated_decay,protein_coding,protein_coding_CDS_not_defined,retained_intron	93.7156	1.52158	0.245694	6.19302	5.9023e-10	4.49885e-09
ENSG00000010327	STAB1	stabilin 1 [Source:HGNC Symbol;Acc:HGNC:18628]	protein_coding,retained_intron	32.2491	2.83063	0.51091	5.54036	3.01845e-08	1.9892e-07
ENSG00000011028	MRC2	mannose receptor C type 2 [Source:HGNC Symbol;Acc:HGNC:16875]	nonsense_mediated_decay,protein_coding,protein_coding_CDS_not_defined,retained_intron	16386.4	-2.95332	0.0410409	-71.9605	0	0
ENSG00000011105	TSPAN9	tetraspanin 9 [Source:HGNC Symbol;Acc:HGNC:21640]	nonsense_mediated_decay,protein_coding,protein_coding_CDS_not_defined,retained_intron	2014.31	-2.49801	0.0625398	-39.9426	0	0
ENSG00000011677	GABRA3	gamma-aminobutyric acid type A receptor subunit alpha3 [Source:HGNC Symbol;Acc:HGNC:4077]	protein_coding,protein_coding_CDS_not_defined	642.306	-3.27019	0.11369	-28.7641	6.03884e-182	1.00314e-179
ENSG00000014257	ACP3	acid phosphatase 3 [Source:HGNC Symbol;Acc:HGNC:125]	protein_coding,protein_coding_CDS_not_defined,retained_intron	3.63032	4.28138	1.56854	2.72953	0.00634243	0.0197914
ENSG00000018236	CNTN1	contactin 1 [Source:HGNC Symbol;Acc:HGNC:2171]	nonsense_mediated_decay,protein_coding,protein_coding_CDS_not_defined	938.239	-2.44444	0.102632	-23.8174	2.20558e-125	2.12661e-123
ENSG00000019505	SYT13	synaptotagmin 13 [Source:HGNC Symbol;Acc:HGNC:14962]	nonsense_mediated_decay,protein_coding	27.6098	2.63952	0.496315	5.31824	1.04774e-07	6.54891e-07
ENSG00000020426	MNAT1	MNAT1 component of CDK activating kinase [Source:HGNC Symbol;Acc:HGNC:7181]	protein_coding,protein_coding_CDS_not_defined,retained_intron	1005.58	-1.69112	0.0773267	-21.8699	5.02986e-106	3.98284e-104
ENSG00000020577	SAMD4A	sterile alpha motif domain containing 4A [Source:HGNC Symbol;Acc:HGNC:23023]	protein_coding,protein_coding_CDS_not_defined,retained_intron	4827.88	-1.83692	0.0442859	-41.4787	0	0
ENSG00000021645	NRXN3	neurexin 3 [Source:HGNC Symbol;Acc:HGNC:8010]	protein_coding,protein_coding_CDS_not_defined,retained_intron	510.122	-3.15886	0.127094	-24.8544	2.31563e-136	2.57371e-134
ENSG00000021762	OSBPL5	oxysterol binding protein like 5 [Source:HGNC Symbol;Acc:HGNC:16392]	nonsense_mediated_decay,protein_coding,protein_coding_CDS_not_defined,retained_intron	1786.62	-1.96761	0.0660985	-29.7679	1.01776e-194	1.96885e-192
ENSG00000021826	CPS1	carbamoyl-phosphate synthase 1 [Source:HGNC Symbol;Acc:HGNC:2323]	nonsense_mediated_decay,protein_coding,protein_coding_CDS_not_defined,retained_intron	1630.35	-2.32753	0.0787853	-29.5427	8.13802e-192	1.50751e-189
ENSG00000023445	BIRC3	baculoviral IAP repeat containing 3 [Source:HGNC Symbol;Acc:HGNC:591]	protein_coding,protein_coding_CDS_not_defined,retained_intron	307.187	2.07695	0.169962	12.2201	2.42676e-34	5.5728e-33
ENSG00000026652	AGPAT4	1-acylglycerol-3-phosphate O-acyltransferase 4 [Source:HGNC Symbol;Acc:HGNC:20885]	nonsense_mediated_decay,protein_coding,retained_intron	802.56	-1.70851	0.0901066	-18.961	3.58407e-80	1.98455e-78
ENSG00000027869	SH2D2A	SH2 domain containing 2A [Source:HGNC Symbol;Acc:HGNC:10821]	protein_coding,protein_coding_CDS_not_defined	15.9841	3.28064	0.698434	4.69713	2.63847e-06	1.41681e-05
ENSG00000031081	ARHGAP31	Rho GTPase activating protein 31 [Source:HGNC Symbol;Acc:HGNC:29216]	protein_coding	2154.89	-3.06939	0.0712126	-43.1018	0	0
ENSG00000035862	TIMP2	TIMP metallopeptidase inhibitor 2 [Source:HGNC Symbol;Acc:HGNC:11821]	nonsense_mediated_decay,protein_coding	10626.4	-1.56149	0.0367318	-42.5107	0	0
ENSG00000038532	CLEC16A	C-type lectin domain containing 16A [Source:HGNC Symbol;Acc:HGNC:29013]	protein_coding,protein_coding_CDS_not_defined,retained_intron	2396.36	-1.66546	0.0629329	-26.4641	2.50963e-154	3.20949e-152
ENSG00000039139	DNAH5	dynein axonemal heavy chain 5 [Source:HGNC Symbol;Acc:HGNC:2950]	protein_coding,protein_coding_CDS_not_defined,retained_intron	122.425	-1.73643	0.215344	-8.06352	7.41273e-16	8.18534e-15
ENSG00000039987	BEST2	bestrophin 2 [Source:HGNC Symbol;Acc:HGNC:17107]	protein_coding	4.92552	3.14961	1.29602	2.43021	0.01509	0.0426549
ENSG00000040731	CDH10	cadherin 10 [Source:HGNC Symbol;Acc:HGNC:1749]	nonsense_mediated_decay,protein_coding,protein_coding_CDS_not_defined,retained_intron	67.2789	-3.32352	0.352187	-9.43682	3.84253e-21	5.51474e-20
ENSG00000040933	INPP4A	inositol polyphosphate-4-phosphatase type I A [Source:HGNC Symbol;Acc:HGNC:6074]	protein_coding,protein_coding_CDS_not_defined,retained_intron	2074.03	-1.5465	0.0662798	-23.3329	2.05438e-120	1.89704e-118
ENSG00000042832	TG	thyroglobulin [Source:HGNC Symbol;Acc:HGNC:11764]	nonsense_mediated_decay,protein_coding,protein_coding_CDS_not_defined,retained_intron	88.8787	1.66072	0.276489	6.00646	1.89614e-09	1.38949e-08
ENSG00000044524	EPHA3	EPH receptor A3 [Source:HGNC Symbol;Acc:HGNC:3387]	protein_coding	34.6016	-2.04331	0.420638	-4.85764	1.18791e-06	6.62804e-06
ENSG00000046774	MAGEC2	MAGE family member C2 [Source:HGNC Symbol;Acc:HGNC:13574]	protein_coding	12.099	3.23621	0.786887	4.11268	3.91088e-05	0.00018139
ENSG00000048052	HDAC9	histone deacetylase 9 [Source:HGNC Symbol;Acc:HGNC:14065]	nonsense_mediated_decay,protein_coding,protein_coding_CDS_not_defined,retained_intron	1056.46	-2.31791	0.0842533	-27.5113	1.28775e-166	1.8055e-164
ENSG00000048540	LMO3	LIM domain only 3 [Source:HGNC Symbol;Acc:HGNC:6643]	nonsense_mediated_decay,protein_coding,protein_coding_CDS_not_defined,retained_intron	23.9987	-1.82366	0.489395	-3.72636	0.000194268	0.000809957
ENSG00000048991	R3HDM1	R3H domain containing 1 [Source:HGNC Symbol;Acc:HGNC:9757]	protein_coding,protein_coding_CDS_not_defined,retained_intron	1997.04	-1.95682	0.0720346	-27.165	1.68545e-162	2.32053e-160
ENSG00000050344	NFE2L3	NFE2 like bZIP transcription factor 3 [Source:HGNC Symbol;Acc:HGNC:7783]	protein_coding,retained_intron	167.439	1.72952	0.199317	8.67724	4.05489e-18	5.02994e-17
ENSG00000052344	PRSS8	serine protease 8 [Source:HGNC Symbol;Acc:HGNC:9491]	protein_coding,retained_intron	36.2426	2.24733	0.407095	5.52039	3.38243e-08	2.21806e-07
ENSG00000053254	FOXN3	forkhead box N3 [Source:HGNC Symbol;Acc:HGNC:1928]	nonsense_mediated_decay,protein_coding,protein_coding_CDS_not_defined	3959.55	-2.23304	0.0506668	-44.0731	0	0
ENSG00000053438	NNAT	neuronatin [Source:HGNC Symbol;Acc:HGNC:7860]	protein_coding	51.5325	1.75561	0.324856	5.40429	6.50674e-08	4.16064e-07
ENSG00000054277	OPN3	opsin 3 [Source:HGNC Symbol;Acc:HGNC:14007]	nonsense_mediated_decay,protein_coding,protein_coding_CDS_not_defined	12.2593	-2.37632	0.689223	-3.44782	0.000565128	0.00217738
ENSG00000054392	HHAT	hedgehog acyltransferase [Source:HGNC Symbol;Acc:HGNC:18270]	protein_coding	1255.59	-1.9238	0.0812724	-23.671	7.16685e-124	6.82414e-122
ENSG00000054690	PLEKHH1	pleckstrin homology, MyTH4 and FERM domain containing H1 [Source:HGNC Symbol;Acc:HGNC:17733]	nonsense_mediated_decay,protein_coding,protein_coding_CDS_not_defined,retained_intron	2883.09	1.54613	0.0535277	28.8847	1.85984e-183	3.14066e-181
ENSG00000056487	PHF21B	PHD finger protein 21B [Source:HGNC Symbol;Acc:HGNC:25161]	protein_coding,protein_coding_CDS_not_defined,retained_intron	496.854	-2.41172	0.114827	-21.0031	6.1506e-98	4.33164e-96
ENSG00000056558	TRAF1	TNF receptor associated factor 1 [Source:HGNC Symbol;Acc:HGNC:12031]	protein_coding	48.774	2.28622	0.375226	6.0929	1.1088e-09	8.29634e-09
ENSG00000057468	MSH4	mutS homolog 4 [Source:HGNC Symbol;Acc:HGNC:7327]	protein_coding	88.9719	3.41284	0.332246	10.272	9.41989e-25	1.56648e-23
ENSG00000058091	CDK14	cyclin dependent kinase 14 [Source:HGNC Symbol;Acc:HGNC:8883]	nonsense_mediated_decay,protein_coding,protein_coding_CDS_not_defined	5050.52	-3.20739	0.0547384	-58.5948	0	0
ENSG00000060656	PTPRU	protein tyrosine phosphatase receptor type U [Source:HGNC Symbol;Acc:HGNC:9683]	protein_coding,protein_coding_CDS_not_defined,retained_intron	6874.12	1.69736	0.0393807	43.1014	0	0
ENSG00000064195	DLX3	distal-less homeobox 3 [Source:HGNC Symbol;Acc:HGNC:2916]	protein_coding	67.6268	2.10324	0.316963	6.6356	3.23174e-11	2.68201e-10
ENSG00000064201	TSPAN32	tetraspanin 32 [Source:HGNC Symbol;Acc:HGNC:13410]	nonsense_mediated_decay,protein_coding,protein_coding_CDS_not_defined,retained_intron	5.15482	4.80558	1.47667	3.25434	0.00113656	0.00414743
ENSG00000064205	CCN5	cellular communication network factor 5 [Source:HGNC Symbol;Acc:HGNC:12770]	protein_coding,protein_coding_CDS_not_defined	42.4377	3.0232	0.430826	7.01722	2.26329e-12	2.02867e-11
ENSG00000064393	HIPK2	homeodomain interacting protein kinase 2 [Source:HGNC Symbol;Acc:HGNC:14402]	protein_coding	2460.58	-1.63962	0.0755129	-21.7131	1.54383e-104	1.19765e-102
ENSG00000064655	EYA2	EYA transcriptional coactivator and phosphatase 2 [Source:HGNC Symbol;Acc:HGNC:3520]	protein_coding,protein_coding_CDS_not_defined	125.329	-2.75228	0.22855	-12.0424	2.12793e-33	4.75441e-32
ENSG00000064692	SNCAIP	synuclein alpha interacting protein [Source:HGNC Symbol;Acc:HGNC:11139]	nonsense_mediated_decay,protein_coding,retained_intron	17.5809	-2.49107	0.608468	-4.094	4.23994e-05	0.000195672
ENSG00000064999	ANKS1A	ankyrin repeat and sterile alpha motif domain containing 1A [Source:HGNC Symbol;Acc:HGNC:20961]	protein_coding,protein_coding_CDS_not_defined	1723.86	-1.6082	0.0650586	-24.7193	6.62768e-135	7.20907e-133
ENSG00000065320	NTN1	netrin 1 [Source:HGNC Symbol;Acc:HGNC:8029]	protein_coding	1250.93	-2.42098	0.0822725	-29.4264	2.52639e-190	4.56917e-188
ENSG00000066405	CLDN18	claudin 18 [Source:HGNC Symbol;Acc:HGNC:2039]	nonsense_mediated_decay,protein_coding	8.95305	-2.14358	0.804913	-2.66312	0.0077419	0.0235959
ENSG00000067715	SYT1	synaptotagmin 1 [Source:HGNC Symbol;Acc:HGNC:11509]	nonsense_mediated_decay,protein_coding,protein_coding_CDS_not_defined	85.612	-2.70521	0.284673	-9.50286	2.04213e-21	2.95959e-20
ENSG00000068976	PYGM	glycogen phosphorylase, muscle associated [Source:HGNC Symbol;Acc:HGNC:9726]	protein_coding,protein_coding_CDS_not_defined,retained_intron	197.02	2.03603	0.173088	11.763	6.0564e-32	1.28195e-30
ENSG00000069188	SDK2	sidekick cell adhesion molecule 2 [Source:HGNC Symbol;Acc:HGNC:19308]	protein_coding,protein_coding_CDS_not_defined,retained_intron	1286.2	-3.04151	0.0996063	-30.5353	8.85185e-205	1.86591e-202
ENSG00000069431	ABCC9	ATP binding cassette subfamily C member 9 [Source:HGNC Symbol;Acc:HGNC:60]	nonsense_mediated_decay,protein_coding,protein_coding_CDS_not_defined,retained_intron	127.303	2.09188	0.22876	9.14443	5.99474e-20	8.08602e-19
ENSG00000069535	MAOB	monoamine oxidase B [Source:HGNC Symbol;Acc:HGNC:6834]	protein_coding,protein_coding_CDS_not_defined	239.209	-1.69576	0.169791	-9.98736	1.73137e-23	2.76053e-22
ENSG00000069696	DRD4	dopamine receptor D4 [Source:HGNC Symbol;Acc:HGNC:3025]	protein_coding,protein_coding_CDS_not_defined	21.8594	-1.53384	0.488944	-3.13704	0.00170664	0.0060249
ENSG00000069764	PLA2G10	phospholipase A2 group X [Source:HGNC Symbol;Acc:HGNC:9029]	nonsense_mediated_decay,protein_coding	12.9253	1.94984	0.677757	2.87691	0.00401595	0.0131154
ENSG00000070193	FGF10	fibroblast growth factor 10 [Source:HGNC Symbol;Acc:HGNC:3666]	protein_coding	14.2616	-3.29607	0.740096	-4.45357	8.44526e-06	4.26519e-05
ENSG00000070526	ST6GALNAC1	ST6 N-acetylgalactosaminide alpha-2,6-sialyltransferase 1 [Source:HGNC Symbol;Acc:HGNC:23614]	nonsense_mediated_decay,protein_coding,protein_coding_CDS_not_defined,retained_intron	20.1312	5.30321	0.949885	5.583	2.36401e-08	1.57112e-07
ENSG00000071051	NCK2	NCK adaptor protein 2 [Source:HGNC Symbol;Acc:HGNC:7665]	protein_coding	3425.82	-1.5986	0.0552634	-28.9268	5.4919e-184	9.32555e-182
ENSG00000071242	RPS6KA2	ribosomal protein S6 kinase A2 [Source:HGNC Symbol;Acc:HGNC:10431]	protein_coding,protein_coding_CDS_not_defined	547.41	-3.10571	0.123626	-25.1218	2.87484e-139	3.30337e-137
ENSG00000071282	LMCD1	LIM and cysteine rich domains 1 [Source:HGNC Symbol;Acc:HGNC:6633]	nonsense_mediated_decay,protein_coding,retained_intron	3961.88	-2.03595	0.0549771	-37.0327	3.40423e-300	1.50798e-297
ENSG00000072657	TRHDE	thyrotropin releasing hormone degrading enzyme [Source:HGNC Symbol;Acc:HGNC:30748]	protein_coding,protein_coding_CDS_not_defined,retained_intron	186.885	-1.56616	0.184386	-8.49388	1.99849e-17	2.3992e-16
ENSG00000073350	LLGL2	LLGL scribble cell polarity complex component 2 [Source:HGNC Symbol;Acc:HGNC:6629]	nonsense_mediated_decay,protein_coding,retained_intron	16.6242	2.09777	0.613561	3.41901	0.000628496	0.00240275
ENSG00000073737	DHRS9	dehydrogenase/reductase 9 [Source:HGNC Symbol;Acc:HGNC:16888]	protein_coding	8.56665	3.22513	0.939028	3.43454	0.000593553	0.00228029
ENSG00000073849	ST6GAL1	ST6 beta-galactoside alpha-2,6-sialyltransferase 1 [Source:HGNC Symbol;Acc:HGNC:10860]	nonsense_mediated_decay,protein_coding,protein_coding_CDS_not_defined,retained_intron	282.588	-1.91367	0.163881	-11.6772	1.66738e-31	3.47873e-30
ENSG00000074047	GLI2	GLI family zinc finger 2 [Source:HGNC Symbol;Acc:HGNC:4318]	nonsense_mediated_decay,protein_coding,protein_coding_CDS_not_defined,retained_intron	2866.01	-3.72159	0.13649	-27.2664	1.06112e-163	1.47423e-161
ENSG00000074211	PPP2R2C	protein phosphatase 2 regulatory subunit Bgamma [Source:HGNC Symbol;Acc:HGNC:9306]	nonsense_mediated_decay,protein_coding,protein_coding_CDS_not_defined,retained_intron	1302.84	-3.04881	0.0833549	-36.5763	6.81245e-293	2.93271e-290
ENSG00000075151	EIF4G3	eukaryotic translation initiation factor 4 gamma 3 [Source:HGNC Symbol;Acc:HGNC:3298]	nonsense_mediated_decay,protein_coding,protein_coding_CDS_not_defined,retained_intron	2553.86	-1.9547	0.0593133	-32.9556	3.52056e-238	9.78235e-236
ENSG00000075223	SEMA3C	semaphorin 3C [Source:HGNC Symbol;Acc:HGNC:10725]	nonsense_mediated_decay,protein_coding,protein_coding_CDS_not_defined	6955.15	-2.57687	0.0528195	-48.7863	0	0
ENSG00000075785	RAB7A	RAB7A, member RAS oncogene family [Source:HGNC Symbol;Acc:HGNC:9788]	nonsense_mediated_decay,protein_coding,protein_coding_CDS_not_defined,retained_intron	6038.18	-1.80568	0.0409305	-44.1156	0	0
ENSG00000075884	ARHGAP15	Rho GTPase activating protein 15 [Source:HGNC Symbol;Acc:HGNC:21030]	protein_coding,protein_coding_CDS_not_defined,retained_intron	27.1707	-2.93782	0.501191	-5.86168	4.58215e-09	3.23823e-08
ENSG00000076685	NT5C2	5'-nucleotidase, cytosolic II [Source:HGNC Symbol;Acc:HGNC:8022]	nonsense_mediated_decay,protein_coding,protein_coding_CDS_not_defined,retained_intron	1062.04	-1.54256	0.0761956	-20.2448	3.95011e-91	2.53645e-89
ENSG00000076770	MBNL3	muscleblind like splicing regulator 3 [Source:HGNC Symbol;Acc:HGNC:20564]	protein_coding,protein_coding_CDS_not_defined	190.63	-2.06852	0.174876	-11.8285	2.78019e-32	5.95908e-31
ENSG00000077943	ITGA8	integrin subunit alpha 8 [Source:HGNC Symbol;Acc:HGNC:6144]	protein_coding,protein_coding_CDS_not_defined	21.1889	-2.27552	0.523939	-4.3431	1.40485e-05	6.91454e-05
ENSG00000077984	CST7	cystatin F [Source:HGNC Symbol;Acc:HGNC:2479]	protein_coding	246.503	1.71538	0.151053	11.3562	6.91183e-30	1.37629e-28
ENSG00000078018	MAP2	microtubule associated protein 2 [Source:HGNC Symbol;Acc:HGNC:6839]	protein_coding,protein_coding_CDS_not_defined,retained_intron	497.287	-3.21785	0.131333	-24.5014	1.42673e-132	1.50892e-130
ENSG00000078295	ADCY2	adenylate cyclase 2 [Source:HGNC Symbol;Acc:HGNC:233]	nonsense_mediated_decay,protein_coding,protein_coding_CDS_not_defined,retained_intron	161.144	-1.79627	0.1949	-9.21637	3.07336e-20	4.1955e-19
ENSG00000078328	RBFOX1	RNA binding fox-1 homolog 1 [Source:HGNC Symbol;Acc:HGNC:18222]	protein_coding,protein_coding_CDS_not_defined,retained_intron	37.9716	-2.33263	0.422287	-5.52379	3.3177e-08	2.17795e-07
ENSG00000078699	CBFA2T2	CBFA2/RUNX1 partner transcriptional co-repressor 2 [Source:HGNC Symbol;Acc:HGNC:1536]	protein_coding,protein_coding_CDS_not_defined	1298.39	-1.83452	0.0752005	-24.3951	1.92758e-131	1.99716e-129
ENSG00000079385	CEACAM1	CEA cell adhesion molecule 1 [Source:HGNC Symbol;Acc:HGNC:1814]	protein_coding,protein_coding_CDS_not_defined,retained_intron	48.061	2.22733	0.358175	6.21855	5.01776e-10	3.84285e-09
ENSG00000079841	RIMS1	regulating synaptic membrane exocytosis 1 [Source:HGNC Symbol;Acc:HGNC:17282]	protein_coding,protein_coding_CDS_not_defined,retained_intron	20.9039	-3.11707	0.603491	-5.16506	2.40355e-07	1.44077e-06
ENSG00000079931	MOXD1	monooxygenase DBH like 1 [Source:HGNC Symbol;Acc:HGNC:21063]	protein_coding,protein_coding_CDS_not_defined	1980.13	-2.57455	0.0694311	-37.0807	5.75448e-301	2.58655e-298
ENSG00000080224	EPHA6	EPH receptor A6 [Source:HGNC Symbol;Acc:HGNC:19296]	nonsense_mediated_decay,protein_coding,protein_coding_CDS_not_defined	163.779	-1.72441	0.182969	-9.42462	4.31675e-21	6.17992e-20
ENSG00000080298	RFX3	regulatory factor X3 [Source:HGNC Symbol;Acc:HGNC:9984]	protein_coding	491.956	-1.77812	0.130982	-13.5753	5.61472e-42	1.5817e-40
ENSG00000081189	MEF2C	myocyte enhancer factor 2C [Source:HGNC Symbol;Acc:HGNC:6996]	protein_coding,protein_coding_CDS_not_defined,retained_intron	77.064	-3.06051	0.309154	-9.89961	4.17904e-23	6.57397e-22
ENSG00000081237	PTPRC	protein tyrosine phosphatase receptor type C [Source:HGNC Symbol;Acc:HGNC:9666]	non_stop_decay,nonsense_mediated_decay,protein_coding,protein_coding_CDS_not_defined,retained_intron	20.8705	-1.61743	0.52303	-3.09242	0.0019853	0.0069215
ENSG00000081803	CADPS2	calcium dependent secretion activator 2 [Source:HGNC Symbol;Acc:HGNC:16018]	protein_coding,protein_coding_CDS_not_defined	306.11	-3.22467	0.162823	-19.8047	2.71183e-87	1.66775e-85
ENSG00000081985	IL12RB2	interleukin 12 receptor subunit beta 2 [Source:HGNC Symbol;Acc:HGNC:5972]	non_stop_decay,nonsense_mediated_decay,protein_coding,protein_coding_CDS_not_defined,retained_intron	14.7161	1.6011	0.599681	2.66992	0.00758689	0.0231847
ENSG00000082438	COBLL1	cordon-bleu WH2 repeat protein like 1 [Source:HGNC Symbol;Acc:HGNC:23571]	nonsense_mediated_decay,protein_coding,protein_coding_CDS_not_defined,retained_intron	818.429	-1.57061	0.0882003	-17.8073	6.19831e-71	3.03122e-69
ENSG00000082805	ERC1	ELKS/RAB6-interacting/CAST family member 1 [Source:HGNC Symbol;Acc:HGNC:17072]	nonsense_mediated_decay,protein_coding,protein_coding_CDS_not_defined,retained_intron	5649.28	-1.91134	0.0536881	-35.6009	1.35846e-277	5.12609e-275
ENSG00000085741	WNT11	Wnt family member 11 [Source:HGNC Symbol;Acc:HGNC:12776]	protein_coding,protein_coding_CDS_not_defined	108.577	-2.60137	0.252418	-10.3058	6.63182e-25	1.10766e-23
ENSG00000086570	FAT2	FAT atypical cadherin 2 [Source:HGNC Symbol;Acc:HGNC:3596]	protein_coding	21.1801	-1.90773	0.575286	-3.31615	0.000912674	0.00338665
ENSG00000087085	ACHE	acetylcholinesterase (Cartwright blood group) [Source:HGNC Symbol;Acc:HGNC:108]	nonsense_mediated_decay,protein_coding,retained_intron	691.323	1.52255	0.0981013	15.5202	2.53242e-54	9.16016e-53
ENSG00000087116	ADAMTS2	ADAM metallopeptidase with thrombospondin type 1 motif 2 [Source:HGNC Symbol;Acc:HGNC:218]	nonsense_mediated_decay,protein_coding,retained_intron	701.011	-2.53018	0.0988858	-25.5869	2.13286e-144	2.54652e-142
ENSG00000087258	GNAO1	G protein subunit alpha o1 [Source:HGNC Symbol;Acc:HGNC:4389]	nonsense_mediated_decay,protein_coding,protein_coding_CDS_not_defined,retained_intron	745.09	-2.0092	0.0970218	-20.7088	2.88843e-95	1.98393e-93
ENSG00000087842	PIR	pirin [Source:HGNC Symbol;Acc:HGNC:30048]	protein_coding,protein_coding_CDS_not_defined	269.386	-1.96432	0.156867	-12.5222	5.64381e-36	1.35722e-34
ENSG00000088320	REM1	RRAD and GEM like GTPase 1 [Source:HGNC Symbol;Acc:HGNC:15922]	protein_coding	2.99198	5.02987	1.67146	3.00927	0.0026188	0.00890761
ENSG00000088387	DOCK9	dedicator of cytokinesis 9 [Source:HGNC Symbol;Acc:HGNC:14132]	nonsense_mediated_decay,protein_coding,protein_coding_CDS_not_defined,retained_intron	865.648	-1.52468	0.0931143	-16.3742	2.92151e-60	1.1843e-58
ENSG00000088756	ARHGAP28	Rho GTPase activating protein 28 [Source:HGNC Symbol;Acc:HGNC:25509]	nonsense_mediated_decay,protein_coding,retained_intron	627.324	-2.60291	0.113738	-22.8851	6.54235e-116	5.72971e-114
ENSG00000088827	SIGLEC1	sialic acid binding Ig like lectin 1 [Source:HGNC Symbol;Acc:HGNC:11127]	protein_coding	4.6568	-5.67312	1.53091	-3.70572	0.000210789	0.000874068
ENSG00000089101	CFAP61	cilia and flagella associated protein 61 [Source:HGNC Symbol;Acc:HGNC:15872]	nonsense_mediated_decay,protein_coding,protein_coding_CDS_not_defined,retained_intron	13.4181	2.51809	0.713169	3.53085	0.000414229	0.00163831
ENSG00000090530	P3H2	prolyl 3-hydroxylase 2 [Source:HGNC Symbol;Acc:HGNC:19317]	protein_coding,retained_intron	1109.56	-3.00863	0.0863733	-34.8329	7.72967e-266	2.68474e-263
ENSG00000091129	NRCAM	neuronal cell adhesion molecule [Source:HGNC Symbol;Acc:HGNC:7994]	protein_coding,protein_coding_CDS_not_defined,retained_intron	82.9548	-3.07697	0.307529	-10.0054	1.44241e-23	2.30702e-22
ENSG00000091428	RAPGEF4	Rap guanine nucleotide exchange factor 4 [Source:HGNC Symbol;Acc:HGNC:16626]	protein_coding,protein_coding_CDS_not_defined,retained_intron	44.9927	-3.06497	0.413698	-7.40872	1.27524e-13	1.23308e-12
ENSG00000091592	NLRP1	NLR family pyrin domain containing 1 [Source:HGNC Symbol;Acc:HGNC:14374]	nonsense_mediated_decay,protein_coding,protein_coding_CDS_not_defined,retained_intron	295.755	1.78534	0.143348	12.4546	1.31999e-35	3.13729e-34
ENSG00000091656	ZFHX4	zinc finger homeobox 4 [Source:HGNC Symbol;Acc:HGNC:30939]	nonsense_mediated_decay,protein_coding,protein_coding_CDS_not_defined,retained_intron	1987.9	-1.56555	0.0874008	-17.9123	9.44947e-72	4.65844e-70
ENSG00000091844	RGS17	regulator of G protein signaling 17 [Source:HGNC Symbol;Acc:HGNC:14088]	protein_coding	168.724	-2.81514	0.197925	-14.2233	6.57078e-46	2.01037e-44
ENSG00000091879	ANGPT2	angiopoietin 2 [Source:HGNC Symbol;Acc:HGNC:485]	protein_coding	20.7704	2.87537	0.622729	4.61738	3.88618e-06	2.04232e-05
ENSG00000092929	UNC13D	unc-13 homolog D [Source:HGNC Symbol;Acc:HGNC:23147]	nonsense_mediated_decay,protein_coding,protein_coding_CDS_not_defined,retained_intron	3986.87	1.5969	0.0466849	34.2059	1.97333e-256	6.34892e-254
ENSG00000095370	SH2D3C	SH2 domain containing 3C [Source:HGNC Symbol;Acc:HGNC:16884]	protein_coding,protein_coding_CDS_not_defined	145.33	1.96168	0.205206	9.55955	1.18273e-21	1.73548e-20
ENSG00000095464	PDE6C	phosphodiesterase 6C [Source:HGNC Symbol;Acc:HGNC:8787]	protein_coding,protein_coding_CDS_not_defined	10.0843	1.88237	0.741928	2.53714	0.0111763	0.0326707
ENSG00000095713	CRTAC1	cartilage acidic protein 1 [Source:HGNC Symbol;Acc:HGNC:14882]	protein_coding,protein_coding_CDS_not_defined	26.8633	-2.19845	0.482903	-4.55256	5.29962e-06	2.73574e-05
ENSG00000099250	NRP1	neuropilin 1 [Source:HGNC Symbol;Acc:HGNC:8004]	protein_coding	3840.08	-1.60749	0.0493134	-32.5974	4.45779e-233	1.17459e-230
ENSG00000099260	PALMD	palmdelphin [Source:HGNC Symbol;Acc:HGNC:15846]	protein_coding,retained_intron	38.6841	2.14614	0.380013	5.64755	1.62749e-08	1.09762e-07
ENSG00000099812	MISP	mitotic spindle positioning [Source:HGNC Symbol;Acc:HGNC:27000]	protein_coding,protein_coding_CDS_not_defined	1587.67	1.92947	0.0652436	29.5733	3.29279e-192	6.13684e-190
ENSG00000099937	SERPIND1	serpin family D member 1 [Source:HGNC Symbol;Acc:HGNC:4838]	protein_coding	24.4022	1.85009	0.534702	3.46003	0.00054011	0.00208968
ENSG00000100024	UPB1	beta-ureidopropionase 1 [Source:HGNC Symbol;Acc:HGNC:16297]	nonsense_mediated_decay,protein_coding,protein_coding_CDS_not_defined,retained_intron	11.1346	-2.19441	0.754151	-2.90978	0.00361683	0.0119396
ENSG00000100027	YPEL1	yippee like 1 [Source:HGNC Symbol;Acc:HGNC:12845]	protein_coding,retained_intron	177.069	-2.42243	0.214694	-11.2832	1.5893e-29	3.11991e-28
ENSG00000100055	CYTH4	cytohesin 4 [Source:HGNC Symbol;Acc:HGNC:9505]	protein_coding,protein_coding_CDS_not_defined,retained_intron	91.9294	3.0705	0.320017	9.59481	8.40756e-22	1.24324e-20
ENSG00000100060	MFNG	MFNG O-fucosylpeptide 3-beta-N-acetylglucosaminyltransferase [Source:HGNC Symbol;Acc:HGNC:7038]	nonsense_mediated_decay,protein_coding,retained_intron	464.1	2.23205	0.12263	18.2015	5.02062e-74	2.54065e-72
ENSG00000100079	LGALS2	galectin 2 [Source:HGNC Symbol;Acc:HGNC:6562]	protein_coding	23.2415	1.80856	0.573199	3.1552	0.00160388	0.00569169
ENSG00000100122	CRYBB1	crystallin beta B1 [Source:HGNC Symbol;Acc:HGNC:2397]	protein_coding,protein_coding_CDS_not_defined	34.3157	-1.77336	0.412179	-4.30239	1.68964e-05	8.23928e-05
ENSG00000100154	TTC28	tetratricopeptide repeat domain 28 [Source:HGNC Symbol;Acc:HGNC:29179]	protein_coding,protein_coding_CDS_not_defined,retained_intron	1278	-1.92986	0.0789155	-24.4547	4.48242e-132	4.72432e-130
ENSG00000100181	TPTEP1	TPTE pseudogene 1 [Source:HGNC Symbol;Acc:HGNC:43648]	transcribed_unprocessed_pseudogene	1012.69	-2.50901	0.08425	-29.7805	6.98041e-195	1.35896e-192
ENSG00000100234	TIMP3	TIMP metallopeptidase inhibitor 3 [Source:HGNC Symbol;Acc:HGNC:11822]	protein_coding	2870.65	-1.66838	0.0531727	-31.3766	4.2213e-216	9.55733e-214
ENSG00000100290	BIK	BCL2 interacting killer [Source:HGNC Symbol;Acc:HGNC:1051]	protein_coding	69.2271	1.57462	0.277229	5.67984	1.34823e-08	9.16967e-08
ENSG00000100298	APOBEC3H	apolipoprotein B mRNA editing enzyme catalytic subunit 3H [Source:HGNC Symbol;Acc:HGNC:24100]	protein_coding,retained_intron	65.8257	1.94156	0.289421	6.70841	1.96753e-11	1.65668e-10
ENSG00000100312	ACR	acrosin [Source:HGNC Symbol;Acc:HGNC:126]	protein_coding,protein_coding_CDS_not_defined,retained_intron	8.13118	-2.85292	0.919943	-3.1012	0.00192741	0.00674014
ENSG00000100433	KCNK10	potassium two pore domain channel subfamily K member 10 [Source:HGNC Symbol;Acc:HGNC:6273]	protein_coding	133.946	-2.0346	0.237747	-8.55785	1.14993e-17	1.39863e-16
ENSG00000100626	GALNT16	polypeptide N-acetylgalactosaminyltransferase 16 [Source:HGNC Symbol;Acc:HGNC:23233]	nonsense_mediated_decay,protein_coding,protein_coding_CDS_not_defined	2816.44	-3.54902	0.071144	-49.885	0	0
ENSG00000100652	SLC10A1	solute carrier family 10 member 1 [Source:HGNC Symbol;Acc:HGNC:10905]	protein_coding	17.2061	1.97603	0.603753	3.27291	0.00106447	0.00390266
ENSG00000101074	R3HDML	R3H domain containing like [Source:HGNC Symbol;Acc:HGNC:16249]	protein_coding	34.6855	-1.5987	0.418916	-3.81629	0.000135473	0.000580261
ENSG00000101076	HNF4A	hepatocyte nuclear factor 4 alpha [Source:HGNC Symbol;Acc:HGNC:5024]	nonsense_mediated_decay,protein_coding,protein_coding_CDS_not_defined,retained_intron	6.9393	4.31691	1.28319	3.36419	0.000767677	0.00289037
ENSG00000101134	DOK5	docking protein 5 [Source:HGNC Symbol;Acc:HGNC:16173]	protein_coding,protein_coding_CDS_not_defined	672.365	-1.53348	0.0913749	-16.7823	3.28673e-63	1.41094e-61
ENSG00000101203	COL20A1	collagen type XX alpha 1 chain [Source:HGNC Symbol;Acc:HGNC:14670]	protein_coding,protein_coding_CDS_not_defined,retained_intron	315.662	2.03193	0.1409	14.421	3.81742e-47	1.19917e-45
ENSG00000101282	RSPO4	R-spondin 4 [Source:HGNC Symbol;Acc:HGNC:16175]	protein_coding	296.219	-2.74117	0.150517	-18.2117	4.16754e-74	2.12301e-72
ENSG00000101292	PROKR2	prokineticin receptor 2 [Source:HGNC Symbol;Acc:HGNC:15836]	protein_coding	26.9408	1.66347	0.438642	3.79231	0.000149251	0.000634294
ENSG00000101445	PPP1R16B	protein phosphatase 1 regulatory subunit 16B [Source:HGNC Symbol;Acc:HGNC:15850]	protein_coding,protein_coding_CDS_not_defined	69.3054	-1.91155	0.296364	-6.45001	1.11841e-10	8.98401e-10
ENSG00000101463	SYNDIG1	synapse differentiation inducing 1 [Source:HGNC Symbol;Acc:HGNC:15885]	protein_coding,protein_coding_CDS_not_defined	43.116	-2.26212	0.400323	-5.65074	1.5976e-08	1.07842e-07
ENSG00000101542	CDH20	cadherin 20 [Source:HGNC Symbol;Acc:HGNC:1760]	protein_coding,retained_intron	10.0973	3.83106	0.964755	3.97102	7.15661e-05	0.000319798
ENSG00000101638	ST8SIA5	ST8 alpha-N-acetyl-neuraminide alpha-2,8-sialyltransferase 5 [Source:HGNC Symbol;Acc:HGNC:17827]	nonsense_mediated_decay,protein_coding,protein_coding_CDS_not_defined,retained_intron	8.62012	-2.94371	0.885501	-3.32434	0.000886266	0.00329988
ENSG00000101695	RNF125	ring finger protein 125 [Source:HGNC Symbol;Acc:HGNC:21150]	nonsense_mediated_decay,protein_coding,protein_coding_CDS_not_defined,retained_intron	162.827	1.86892	0.190418	9.81486	9.71711e-23	1.50002e-21
ENSG00000101846	STS	steroid sulfatase [Source:HGNC Symbol;Acc:HGNC:11425]	nonsense_mediated_decay,protein_coding,protein_coding_CDS_not_defined	230.082	-1.60281	0.164645	-9.73498	2.13857e-22	3.24072e-21
ENSG00000101849	TBL1X	transducin beta like 1 X-linked [Source:HGNC Symbol;Acc:HGNC:11585]	protein_coding,protein_coding_CDS_not_defined,retained_intron	2589.7	-1.93785	0.0626859	-30.9136	7.84039e-210	1.68762e-207
ENSG00000101850	GPR143	G protein-coupled receptor 143 [Source:HGNC Symbol;Acc:HGNC:20145]	protein_coding,protein_coding_CDS_not_defined	22.7276	2.38718	0.60044	3.97572	7.01668e-05	0.000314096
ENSG00000101868	POLA1	DNA polymerase alpha 1, catalytic subunit [Source:HGNC Symbol;Acc:HGNC:9173]	nonsense_mediated_decay,protein_coding,protein_coding_CDS_not_defined,retained_intron	1666.57	-1.84858	0.0637549	-28.9952	7.56413e-185	1.29161e-182
ENSG00000101871	MID1	midline 1 [Source:HGNC Symbol;Acc:HGNC:7095]	protein_coding,protein_coding_CDS_not_defined,retained_intron	70.962	-4.21249	0.390753	-10.7804	4.25918e-27	7.71219e-26
ENSG00000101974	ATP11C	ATPase phospholipid transporting 11C [Source:HGNC Symbol;Acc:HGNC:13554]	protein_coding,protein_coding_CDS_not_defined	1163.04	-1.99918	0.0806267	-24.7955	1.00308e-135	1.10682e-133
ENSG00000102048	ASB9	ankyrin repeat and SOCS box containing 9 [Source:HGNC Symbol;Acc:HGNC:17184]	protein_coding,protein_coding_CDS_not_defined	287.544	1.5647	0.14288	10.9511	6.56368e-28	1.23079e-26
ENSG00000102053	ZC3H12B	zinc finger CCCH-type containing 12B [Source:HGNC Symbol;Acc:HGNC:17407]	protein_coding,protein_coding_CDS_not_defined,retained_intron	196.499	-1.82393	0.184425	-9.88981	4.60902e-23	7.22064e-22
ENSG00000102271	KLHL4	kelch like family member 4 [Source:HGNC Symbol;Acc:HGNC:6355]	nonsense_mediated_decay,protein_coding	1317.04	-1.53205	0.0699915	-21.889	3.30487e-106	2.62373e-104
ENSG00000102349	KLF8	Kruppel like factor 8 [Source:HGNC Symbol;Acc:HGNC:6351]	nonsense_mediated_decay,protein_coding,retained_intron	22.3237	-1.75128	0.504187	-3.47348	0.000513756	0.0019958
ENSG00000102385	DRP2	dystrophin related protein 2 [Source:HGNC Symbol;Acc:HGNC:3032]	nonsense_mediated_decay,protein_coding	92.028	-2.02122	0.25396	-7.95882	1.73681e-15	1.87185e-14
ENSG00000102466	FGF14	fibroblast growth factor 14 [Source:HGNC Symbol;Acc:HGNC:3671]	protein_coding,protein_coding_CDS_not_defined	25.0456	-2.48466	0.50384	-4.93146	8.16193e-07	4.63353e-06
ENSG00000102468	HTR2A	5-hydroxytryptamine receptor 2A [Source:HGNC Symbol;Acc:HGNC:5293]	protein_coding	673.383	-2.38278	0.107528	-22.1596	8.43565e-109	6.87562e-107
ENSG00000102934	PLLP	plasmolipin [Source:HGNC Symbol;Acc:HGNC:18553]	protein_coding,protein_coding_CDS_not_defined	145.525	1.52619	0.202968	7.51936	5.50449e-14	5.45364e-13
ENSG00000102935	ZNF423	zinc finger protein 423 [Source:HGNC Symbol;Acc:HGNC:16762]	protein_coding	97.7064	-2.18769	0.260714	-8.39116	4.81372e-17	5.66761e-16
ENSG00000103043	VAC14	VAC14 component of PIKFYVE complex [Source:HGNC Symbol;Acc:HGNC:25507]	non_stop_decay,nonsense_mediated_decay,protein_coding,protein_coding_CDS_not_defined,retained_intron	2125.11	-1.58697	0.0634472	-25.0125	4.4741e-138	5.04616e-136
ENSG00000103381	CPPED1	calcineurin like phosphoesterase domain containing 1 [Source:HGNC Symbol;Acc:HGNC:25632]	protein_coding,retained_intron	762.979	-1.79156	0.0886976	-20.1985	1.00907e-90	6.46584e-89
ENSG00000103489	XYLT1	xylosyltransferase 1 [Source:HGNC Symbol;Acc:HGNC:15516]	protein_coding,protein_coding_CDS_not_defined,retained_intron	555.305	-2.21367	0.109825	-20.1564	2.36471e-90	1.50298e-88
ENSG00000103534	TMC5	transmembrane channel like 5 [Source:HGNC Symbol;Acc:HGNC:22999]	nonsense_mediated_decay,protein_coding,protein_coding_CDS_not_defined,retained_intron	94.9931	1.78195	0.23861	7.46806	8.13842e-14	7.98045e-13
ENSG00000103546	SLC6A2	solute carrier family 6 member 2 [Source:HGNC Symbol;Acc:HGNC:11048]	nonsense_mediated_decay,protein_coding	6.31609	-3.09843	1.09202	-2.83733	0.0045492	0.0146704
ENSG00000103647	CORO2B	coronin 2B [Source:HGNC Symbol;Acc:HGNC:2256]	protein_coding	641.965	-3.22227	0.109682	-29.3783	1.03845e-189	1.85615e-187
ENSG00000103723	AP3B2	adaptor related protein complex 3 subunit beta 2 [Source:HGNC Symbol;Acc:HGNC:567]	nonsense_mediated_decay,protein_coding,protein_coding_CDS_not_defined,retained_intron	78.1285	-1.50412	0.274736	-5.47477	4.38083e-08	2.84591e-07
ENSG00000104059	FAM189A1	family with sequence similarity 189 member A1 [Source:HGNC Symbol;Acc:HGNC:29075]	protein_coding,protein_coding_CDS_not_defined,retained_intron	16.3937	-2.38887	0.663866	-3.59841	0.000320166	0.00128948
ENSG00000104140	RHOV	ras homolog family member V [Source:HGNC Symbol;Acc:HGNC:18313]	protein_coding	59.8569	1.74556	0.312893	5.57879	2.42201e-08	1.60757e-07
ENSG00000104324	CPQ	carboxypeptidase Q [Source:HGNC Symbol;Acc:HGNC:16910]	protein_coding,protein_coding_CDS_not_defined	270.773	-1.54941	0.142178	-10.8977	1.18237e-27	2.19157e-26
ENSG00000104490	NCALD	neurocalcin delta [Source:HGNC Symbol;Acc:HGNC:7655]	protein_coding,protein_coding_CDS_not_defined,retained_intron	20.0304	-2.17565	0.53802	-4.0438	5.2591e-05	0.000239167
ENSG00000104848	KCNA7	potassium voltage-gated channel subfamily A member 7 [Source:HGNC Symbol;Acc:HGNC:6226]	protein_coding	31.7298	1.74095	0.447747	3.88825	0.00010097	0.000440687
ENSG00000104879	CKM	creatine kinase, M-type [Source:HGNC Symbol;Acc:HGNC:1994]	protein_coding	5.43014	3.94393	1.34975	2.92196	0.00347832	0.0115189
ENSG00000104941	RSPH6A	radial spoke head 6 homolog A [Source:HGNC Symbol;Acc:HGNC:14241]	protein_coding	10.8166	3.05748	0.852786	3.58528	0.000336715	0.00135186
ENSG00000105261	OVOL3	ovo like zinc finger 3 [Source:HGNC Symbol;Acc:HGNC:14186]	protein_coding	22.6501	1.65191	0.486524	3.39533	0.000685449	0.00260355
ENSG00000105289	TJP3	tight junction protein 3 [Source:HGNC Symbol;Acc:HGNC:11829]	nonsense_mediated_decay,protein_coding,protein_coding_CDS_not_defined,retained_intron	231.267	1.51786	0.158071	9.6024	7.81022e-22	1.15603e-20
ENSG00000105509	HAS1	hyaluronan synthase 1 [Source:HGNC Symbol;Acc:HGNC:4818]	protein_coding	19.6073	2.13258	0.587662	3.62892	0.00028461	0.00115634
ENSG00000105738	SIPA1L3	signal induced proliferation associated 1 like 3 [Source:HGNC Symbol;Acc:HGNC:23801]	nonsense_mediated_decay,protein_coding,protein_coding_CDS_not_defined,retained_intron	562.953	-2.70436	0.110166	-24.5481	4.53095e-133	4.82538e-131
ENSG00000106018	VIPR2	vasoactive intestinal peptide receptor 2 [Source:HGNC Symbol;Acc:HGNC:12695]	protein_coding	23.5069	-1.56641	0.479697	-3.26543	0.00109299	0.00399799
ENSG00000106034	CPED1	cadherin like and PC-esterase domain containing 1 [Source:HGNC Symbol;Acc:HGNC:26159]	nonsense_mediated_decay,protein_coding,protein_coding_CDS_not_defined	123.229	-2.0249	0.23148	-8.74764	2.17867e-18	2.73026e-17
ENSG00000106049	HIBADH	3-hydroxyisobutyrate dehydrogenase [Source:HGNC Symbol;Acc:HGNC:4907]	nonsense_mediated_decay,protein_coding,retained_intron	2133.08	-1.55017	0.0582873	-26.5953	7.68726e-156	1.00411e-153
ENSG00000106128	GHRHR	growth hormone releasing hormone receptor [Source:HGNC Symbol;Acc:HGNC:4266]	nonsense_mediated_decay,protein_coding,protein_coding_CDS_not_defined,retained_intron	29.2445	1.86554	0.430259	4.33585	1.45195e-05	7.12913e-05
ENSG00000106258	CYP3A5	cytochrome P450 family 3 subfamily A member 5 [Source:HGNC Symbol;Acc:HGNC:2638]	nonsense_mediated_decay,protein_coding,protein_coding_CDS_not_defined,retained_intron	155.948	-1.50155	0.185048	-8.11441	4.88169e-16	5.45752e-15
ENSG00000106436	MYL10	myosin light chain 10 [Source:HGNC Symbol;Acc:HGNC:29825]	protein_coding	22.1977	-1.86001	0.498727	-3.72951	0.000191855	0.00080066
ENSG00000106479	ZNF862	zinc finger protein 862 [Source:HGNC Symbol;Acc:HGNC:34519]	protein_coding,protein_coding_CDS_not_defined,retained_intron	44.8215	1.96719	0.377348	5.21319	1.85618e-07	1.12853e-06
ENSG00000106536	POU6F2	POU class 6 homeobox 2 [Source:HGNC Symbol;Acc:HGNC:21694]	nonsense_mediated_decay,protein_coding,protein_coding_CDS_not_defined	104.503	-3.81303	0.299952	-12.7121	5.06239e-37	1.25289e-35
ENSG00000106688	SLC1A1	solute carrier family 1 member 1 [Source:HGNC Symbol;Acc:HGNC:10939]	protein_coding,protein_coding_CDS_not_defined	58.1333	-1.67378	0.312063	-5.36361	8.15753e-08	5.16221e-07
ENSG00000106772	PRUNE2	prune homolog 2 with BCH domain [Source:HGNC Symbol;Acc:HGNC:25209]	protein_coding,protein_coding_CDS_not_defined	151.776	-2.86395	0.211777	-13.5234	1.13808e-41	3.17966e-40
ENSG00000106809	OGN	osteoglycin [Source:HGNC Symbol;Acc:HGNC:8126]	protein_coding,protein_coding_CDS_not_defined	7.7673	3.05875	1.02071	2.99669	0.00272929	0.00925355
ENSG00000106952	TNFSF8	TNF superfamily member 8 [Source:HGNC Symbol;Acc:HGNC:11938]	protein_coding,protein_coding_CDS_not_defined	6.29596	6.10391	1.43262	4.26066	2.03824e-05	9.83504e-05
ENSG00000107099	DOCK8	dedicator of cytokinesis 8 [Source:HGNC Symbol;Acc:HGNC:19191]	nonsense_mediated_decay,protein_coding,protein_coding_CDS_not_defined,retained_intron	95.7329	-1.70462	0.236205	-7.21669	5.32694e-13	4.99442e-12
ENSG00000107282	APBA1	amyloid beta precursor protein binding family A member 1 [Source:HGNC Symbol;Acc:HGNC:578]	protein_coding,retained_intron	74.0199	-2.60601	0.329774	-7.9024	2.73579e-15	2.92991e-14
ENSG00000107719	PALD1	phosphatase domain containing paladin 1 [Source:HGNC Symbol;Acc:HGNC:23530]	nonsense_mediated_decay,protein_coding,protein_coding_CDS_not_defined,retained_intron	994.009	-2.18371	0.0881296	-24.7784	1.53359e-135	1.68612e-133
ENSG00000107736	CDH23	cadherin related 23 [Source:HGNC Symbol;Acc:HGNC:13733]	nonsense_mediated_decay,protein_coding,protein_coding_CDS_not_defined,retained_intron	100.621	-1.52343	0.233511	-6.52401	6.84523e-11	5.56892e-10
ENSG00000107796	ACTA2	actin alpha 2, smooth muscle [Source:HGNC Symbol;Acc:HGNC:130]	protein_coding,protein_coding_CDS_not_defined	226.889	1.5457	0.153477	10.0712	7.4058e-24	1.19513e-22
ENSG00000107902	LHPP	phospholysine phosphohistidine inorganic pyrophosphate phosphatase [Source:HGNC Symbol;Acc:HGNC:30042]	protein_coding,protein_coding_CDS_not_defined	773.867	-3.42472	0.105823	-32.3627	9.1905e-230	2.30252e-227
ENSG00000108018	SORCS1	sortilin related VPS10 domain containing receptor 1 [Source:HGNC Symbol;Acc:HGNC:16697]	protein_coding,protein_coding_CDS_not_defined,retained_intron	76.9474	-2.16786	0.303441	-7.14426	9.04831e-13	8.35029e-12
ENSG00000108175	ZMIZ1	zinc finger MIZ-type containing 1 [Source:HGNC Symbol;Acc:HGNC:16493]	protein_coding,protein_coding_CDS_not_defined	4631.75	-1.81043	0.0646465	-28.0051	1.40676e-172	2.12859e-170
ENSG00000108306	FBXL20	F-box and leucine rich repeat protein 20 [Source:HGNC Symbol;Acc:HGNC:24679]	protein_coding	765.101	-1.71837	0.0856951	-20.0521	1.93361e-89	1.22362e-87
ENSG00000108375	RNF43	ring finger protein 43 [Source:HGNC Symbol;Acc:HGNC:18505]	protein_coding,protein_coding_CDS_not_defined,retained_intron	327.608	1.59629	0.127551	12.5149	6.18858e-36	1.48589e-34
ENSG00000108405	P2RX1	purinergic receptor P2X 1 [Source:HGNC Symbol;Acc:HGNC:8533]	nonsense_mediated_decay,protein_coding,retained_intron	15.4236	1.52479	0.591449	2.57806	0.00993557	0.0294493
ENSG00000108924	HLF	HLF transcription factor, PAR bZIP family member [Source:HGNC Symbol;Acc:HGNC:4977]	nonsense_mediated_decay,protein_coding,protein_coding_CDS_not_defined	31.5906	-1.60231	0.453289	-3.53486	0.000407994	0.0016147
ENSG00000109061	MYH1	myosin heavy chain 1 [Source:HGNC Symbol;Acc:HGNC:7567]	protein_coding	33.6653	-4.01602	1.05428	-3.80927	0.00013938	0.000595659
ENSG00000109158	GABRA4	gamma-aminobutyric acid type A receptor subunit alpha4 [Source:HGNC Symbol;Acc:HGNC:4078]	nonsense_mediated_decay,protein_coding,protein_coding_CDS_not_defined	9.31463	2.38903	0.816762	2.925	0.00344451	0.0114239
ENSG00000109265	CRACD	capping protein inhibiting regulator of actin dynamics [Source:HGNC Symbol;Acc:HGNC:29219]	protein_coding,protein_coding_CDS_not_defined	843.372	-3.95238	0.117942	-33.5111	3.32378e-246	9.95994e-244
ENSG00000109472	CPE	carboxypeptidase E [Source:HGNC Symbol;Acc:HGNC:2303]	protein_coding,protein_coding_CDS_not_defined	2012.47	-3.62985	0.0803244	-45.1899	0	0
ENSG00000109586	GALNT7	polypeptide N-acetylgalactosaminyltransferase 7 [Source:HGNC Symbol;Acc:HGNC:4129]	protein_coding,protein_coding_CDS_not_defined,retained_intron	3402.42	-1.55308	0.0483015	-32.154	7.7756e-227	1.91662e-224
ENSG00000109927	TECTA	tectorin alpha [Source:HGNC Symbol;Acc:HGNC:11720]	protein_coding,protein_coding_CDS_not_defined,retained_intron	29.4969	-3.55902	0.546033	-6.51796	7.12718e-11	5.78906e-10
ENSG00000110195	FOLR1	folate receptor alpha [Source:HGNC Symbol;Acc:HGNC:3791]	protein_coding	1426.28	2.29624	0.0779065	29.4743	6.15116e-191	1.13259e-188
ENSG00000110427	KIAA1549L	KIAA1549 like [Source:HGNC Symbol;Acc:HGNC:24836]	protein_coding	1488.44	-1.8427	0.0796727	-23.1284	2.39977e-118	2.15732e-116
ENSG00000111186	WNT5B	Wnt family member 5B [Source:HGNC Symbol;Acc:HGNC:16265]	protein_coding,protein_coding_CDS_not_defined	224.049	-3.25954	0.195985	-16.6316	4.11735e-62	1.72867e-60
ENSG00000111249	CUX2	cut like homeobox 2 [Source:HGNC Symbol;Acc:HGNC:19347]	protein_coding,protein_coding_CDS_not_defined	97.9277	-3.54149	0.312184	-11.3442	7.92024e-30	1.57196e-28
ENSG00000111335	OAS2	2'-5'-oligoadenylate synthetase 2 [Source:HGNC Symbol;Acc:HGNC:8087]	nonsense_mediated_decay,protein_coding,retained_intron	27.8474	2.6605	0.540202	4.92501	8.43572e-07	4.78363e-06
ENSG00000111341	MGP	matrix Gla protein [Source:HGNC Symbol;Acc:HGNC:7060]	protein_coding,retained_intron	47.3968	-2.99724	0.390611	-7.67323	1.67723e-14	1.71453e-13
ENSG00000111348	ARHGDIB	Rho GDP dissociation inhibitor beta [Source:HGNC Symbol;Acc:HGNC:679]	protein_coding,protein_coding_CDS_not_defined,retained_intron	349.352	1.98494	0.130732	15.1833	4.56558e-52	1.59118e-50
ENSG00000111962	UST	uronyl 2-sulfotransferase [Source:HGNC Symbol;Acc:HGNC:17223]	protein_coding,protein_coding_CDS_not_defined	217.884	-2.35185	0.167248	-14.0621	6.49644e-45	1.9467e-43
ENSG00000112182	BACH2	BTB domain and CNC homolog 2 [Source:HGNC Symbol;Acc:HGNC:14078]	protein_coding,protein_coding_CDS_not_defined,retained_intron	327.563	-2.44789	0.155566	-15.7353	8.66181e-56	3.23653e-54
ENSG00000112232	KHDRBS2	KH RNA binding domain containing, signal transduction associated 2 [Source:HGNC Symbol;Acc:HGNC:18114]	nonsense_mediated_decay,protein_coding	18.4046	-2.19866	0.625848	-3.51309	0.000442923	0.00174323
ENSG00000112320	SOBP	sine oculis binding protein homolog [Source:HGNC Symbol;Acc:HGNC:29256]	protein_coding,protein_coding_CDS_not_defined,retained_intron	312.347	-1.54725	0.138114	-11.2027	3.95354e-29	7.70663e-28
ENSG00000112394	SLC16A10	solute carrier family 16 member 10 [Source:HGNC Symbol;Acc:HGNC:17027]	protein_coding,protein_coding_CDS_not_defined	47.2459	-4.2786	0.481306	-8.88956	6.13492e-19	7.86222e-18
ENSG00000112494	UNC93A	unc-93 homolog A [Source:HGNC Symbol;Acc:HGNC:12570]	protein_coding,protein_coding_CDS_not_defined,retained_intron	3.15175	5.10539	1.66231	3.07126	0.00213158	0.00738767
ENSG00000112562	SMOC2	SPARC related modular calcium binding 2 [Source:HGNC Symbol;Acc:HGNC:20323]	nonsense_mediated_decay,protein_coding,protein_coding_CDS_not_defined	144.135	-4.0132	0.288382	-13.9162	5.04732e-44	1.48338e-42
ENSG00000112699	GMDS	GDP-mannose 4,6-dehydratase [Source:HGNC Symbol;Acc:HGNC:4369]	protein_coding,protein_coding_CDS_not_defined,retained_intron	320.837	-2.66728	0.143006	-18.6515	1.22761e-77	6.57125e-76
ENSG00000112769	LAMA4	laminin subunit alpha 4 [Source:HGNC Symbol;Acc:HGNC:6484]	nonsense_mediated_decay,protein_coding,protein_coding_CDS_not_defined,retained_intron	405.994	-2.69386	0.13735	-19.6132	1.1926e-85	7.21819e-84
ENSG00000112964	GHR	growth hormone receptor [Source:HGNC Symbol;Acc:HGNC:4263]	nonsense_mediated_decay,protein_coding,protein_coding_CDS_not_defined	356.804	-2.74261	0.144111	-19.0313	9.39685e-81	5.27968e-79
ENSG00000112977	DAP	death associated protein [Source:HGNC Symbol;Acc:HGNC:2672]	protein_coding,protein_coding_CDS_not_defined,retained_intron	6726.37	-1.57705	0.0379209	-41.5878	0	0
ENSG00000113319	RASGRF2	Ras protein specific guanine nucleotide releasing factor 2 [Source:HGNC Symbol;Acc:HGNC:9876]	nonsense_mediated_decay,protein_coding,protein_coding_CDS_not_defined,retained_intron	44.0961	-2.30342	0.376409	-6.11946	9.38947e-10	7.06522e-09
ENSG00000113361	CDH6	cadherin 6 [Source:HGNC Symbol;Acc:HGNC:1765]	protein_coding,retained_intron	83.6948	-1.79731	0.258237	-6.95992	3.40474e-12	3.01728e-11
ENSG00000113389	NPR3	natriuretic peptide receptor 3 [Source:HGNC Symbol;Acc:HGNC:7945]	protein_coding,retained_intron	16.7529	-2.64812	0.712989	-3.71411	0.000203917	0.000847066
ENSG00000113391	FAM172A	family with sequence similarity 172 member A [Source:HGNC Symbol;Acc:HGNC:25365]	nonsense_mediated_decay,protein_coding,protein_coding_CDS_not_defined,retained_intron	1057.3	-3.11555	0.0925384	-33.6676	1.72328e-248	5.32042e-246
ENSG00000113719	ERGIC1	endoplasmic reticulum-golgi intermediate compartment 1 [Source:HGNC Symbol;Acc:HGNC:29205]	nonsense_mediated_decay,protein_coding,protein_coding_CDS_not_defined,retained_intron	5237.77	-1.55586	0.04403	-35.3364	1.62207e-273	5.83278e-271
ENSG00000113763	UNC5A	unc-5 netrin receptor A [Source:HGNC Symbol;Acc:HGNC:12567]	nonsense_mediated_decay,protein_coding	63.6199	-2.46612	0.310199	-7.95012	1.86328e-15	2.00603e-14
ENSG00000113805	CNTN3	contactin 3 [Source:HGNC Symbol;Acc:HGNC:2173]	protein_coding,protein_coding_CDS_not_defined	127.005	-2.33788	0.230991	-10.1211	4.45518e-24	7.24323e-23
ENSG00000113946	CLDN16	claudin 16 [Source:HGNC Symbol;Acc:HGNC:2037]	protein_coding,protein_coding_CDS_not_defined	3.6442	-5.32023	1.58765	-3.351	0.000805203	0.00302087
ENSG00000114279	FGF12	fibroblast growth factor 12 [Source:HGNC Symbol;Acc:HGNC:3668]	protein_coding,protein_coding_CDS_not_defined,retained_intron	211.721	-1.53512	0.168797	-9.09446	9.5059e-20	1.27043e-18
ENSG00000114654	EFCC1	EF-hand and coiled-coil domain containing 1 [Source:HGNC Symbol;Acc:HGNC:25692]	protein_coding,retained_intron	56.1471	-1.78572	0.360995	-4.94666	7.54967e-07	4.29953e-06
ENSG00000114757	PEX5L	peroxisomal biogenesis factor 5 like [Source:HGNC Symbol;Acc:HGNC:30024]	protein_coding,protein_coding_CDS_not_defined,retained_intron	29.3873	-1.73197	0.440684	-3.93019	8.48802e-05	0.000375233
ENSG00000114771	AADAC	arylacetamide deacetylase [Source:HGNC Symbol;Acc:HGNC:17]	protein_coding	15.3082	2.04698	0.724404	2.82574	0.00471711	0.0151559
ENSG00000114805	PLCH1	phospholipase C eta 1 [Source:HGNC Symbol;Acc:HGNC:29185]	protein_coding,retained_intron	610.336	-1.70813	0.111555	-15.3121	6.35159e-53	2.24955e-51
ENSG00000115008	IL1A	interleukin 1 alpha [Source:HGNC Symbol;Acc:HGNC:5991]	protein_coding	45.7931	1.85011	0.347464	5.32462	1.01165e-07	6.33241e-07
ENSG00000115339	GALNT3	polypeptide N-acetylgalactosaminyltransferase 3 [Source:HGNC Symbol;Acc:HGNC:4125]	nonsense_mediated_decay,protein_coding,retained_intron	45.6317	1.60819	0.348723	4.61167	3.99451e-06	2.09456e-05
ENSG00000115468	EFHD1	EF-hand domain family member D1 [Source:HGNC Symbol;Acc:HGNC:29556]	nonsense_mediated_decay,protein_coding	40.9986	-1.80571	0.389776	-4.63268	3.60955e-06	1.9048e-05
ENSG00000115474	KCNJ13	potassium inwardly rectifying channel subfamily J member 13 [Source:HGNC Symbol;Acc:HGNC:6259]	protein_coding	32.104	5.23809	0.737839	7.09924	1.25448e-12	1.14732e-11
ENSG00000115556	PLCD4	phospholipase C delta 4 [Source:HGNC Symbol;Acc:HGNC:9062]	nonsense_mediated_decay,protein_coding,retained_intron	16.1934	1.5389	0.577667	2.66399	0.00772199	0.0235453
ENSG00000115756	HPCAL1	hippocalcin like 1 [Source:HGNC Symbol;Acc:HGNC:5145]	nonsense_mediated_decay,protein_coding	905.674	-2.4045	0.0862027	-27.8936	3.19452e-171	4.6718e-169
ENSG00000116031	CD207	CD207 molecule [Source:HGNC Symbol;Acc:HGNC:17935]	protein_coding	22.8	-1.79612	0.517777	-3.46891	0.000522576	0.00202723
ENSG00000116117	PARD3B	par-3 family cell polarity regulator beta [Source:HGNC Symbol;Acc:HGNC:14446]	nonsense_mediated_decay,protein_coding,protein_coding_CDS_not_defined	566.944	-2.40186	0.111204	-21.5987	1.84756e-103	1.40474e-101
ENSG00000116191	RALGPS2	Ral GEF with PH domain and SH3 binding motif 2 [Source:HGNC Symbol;Acc:HGNC:30279]	protein_coding,retained_intron	1209.94	-1.66964	0.0743156	-22.4669	8.74744e-112	7.30507e-110
ENSG00000116194	ANGPTL1	angiopoietin like 1 [Source:HGNC Symbol;Acc:HGNC:489]	protein_coding	18.5147	6.68572	1.26549	5.2831	1.27014e-07	7.86183e-07
ENSG00000116299	ELAPOR1	endosome-lysosome associated apoptosis and autophagy regulator 1 [Source:HGNC Symbol;Acc:HGNC:29618]	nonsense_mediated_decay,protein_coding,protein_coding_CDS_not_defined,retained_intron	693.381	1.908	0.0960048	19.874	6.82735e-88	4.25873e-86
ENSG00000116560	SFPQ	splicing factor proline and glutamine rich [Source:HGNC Symbol;Acc:HGNC:10774]	nonsense_mediated_decay,protein_coding,protein_coding_CDS_not_defined	12825.9	-2.733	0.093595	-29.2002	1.92618e-187	3.3451e-185
ENSG00000116675	DNAJC6	DnaJ heat shock protein family (Hsp40) member C6 [Source:HGNC Symbol;Acc:HGNC:15469]	protein_coding,protein_coding_CDS_not_defined	264.814	-2.46065	0.157395	-15.6336	4.29661e-55	1.58606e-53
ENSG00000116678	LEPR	leptin receptor [Source:HGNC Symbol;Acc:HGNC:6554]	protein_coding,protein_coding_CDS_not_defined	939.675	-4.14631	0.111724	-37.1122	1.78667e-301	8.15069e-299
ENSG00000117013	KCNQ4	potassium voltage-gated channel subfamily Q member 4 [Source:HGNC Symbol;Acc:HGNC:6298]	protein_coding,protein_coding_CDS_not_defined	35.8314	-2.63065	0.445715	-5.90208	3.58941e-09	2.56513e-08
ENSG00000117148	ACTL8	actin like 8 [Source:HGNC Symbol;Acc:HGNC:24018]	protein_coding	14.6699	2.17961	0.709009	3.07417	0.0021109	0.00732347
ENSG00000117472	TSPAN1	tetraspanin 1 [Source:HGNC Symbol;Acc:HGNC:20657]	protein_coding,protein_coding_CDS_not_defined	203.288	1.63289	0.166366	9.81509	9.69496e-23	1.49735e-21
ENSG00000117594	HSD11B1	hydroxysteroid 11-beta dehydrogenase 1 [Source:HGNC Symbol;Acc:HGNC:5208]	protein_coding	2.62807	4.8454	1.73034	2.80026	0.00510613	0.0162843
ENSG00000117834	SLC5A9	solute carrier family 5 member 9 [Source:HGNC Symbol;Acc:HGNC:22146]	nonsense_mediated_decay,protein_coding,protein_coding_CDS_not_defined,retained_intron	19.525	-2.21861	0.56538	-3.9241	8.70543e-05	0.000384051
ENSG00000118307	DNAI7	dynein axonemal intermediate chain 7 [Source:HGNC Symbol;Acc:HGNC:29599]	nonsense_mediated_decay,protein_coding,protein_coding_CDS_not_defined,retained_intron	32.3115	-1.57997	0.399105	-3.95879	7.53319e-05	0.000335448
ENSG00000118322	ATP10B	ATPase phospholipid transporting 10B (putative) [Source:HGNC Symbol;Acc:HGNC:13543]	protein_coding,protein_coding_CDS_not_defined,retained_intron	30.3416	-1.62018	0.430792	-3.76094	0.000169274	0.000713736
ENSG00000118557	PMFBP1	polyamine modulated factor 1 binding protein 1 [Source:HGNC Symbol;Acc:HGNC:17728]	nonsense_mediated_decay,protein_coding,protein_coding_CDS_not_defined	52.9858	-1.8688	0.322785	-5.7896	7.0556e-09	4.91576e-08
ENSG00000118596	SLC16A7	solute carrier family 16 member 7 [Source:HGNC Symbol;Acc:HGNC:10928]	nonsense_mediated_decay,protein_coding,protein_coding_CDS_not_defined	329.59	-3.16603	0.155876	-20.3113	1.02243e-91	6.66324e-90
ENSG00000118922	KLF12	Kruppel like factor 12 [Source:HGNC Symbol;Acc:HGNC:6346]	protein_coding,retained_intron	1418.62	-2.50779	0.0715278	-35.0603	2.71239e-269	9.64003e-267
ENSG00000118946	PCDH17	protocadherin 17 [Source:HGNC Symbol;Acc:HGNC:14267]	nonsense_mediated_decay,protein_coding	212.401	-4.97424	0.668036	-7.44607	9.6162e-14	9.39339e-13
ENSG00000119508	NR4A3	nuclear receptor subfamily 4 group A member 3 [Source:HGNC Symbol;Acc:HGNC:7982]	protein_coding	146.311	1.60637	0.195847	8.20218	2.36066e-16	2.68229e-15
ENSG00000119608	PROX2	prospero homeobox 2 [Source:HGNC Symbol;Acc:HGNC:26715]	protein_coding	10.2422	2.55219	0.778952	3.27644	0.00105124	0.00385915
ENSG00000119715	ESRRB	estrogen related receptor beta [Source:HGNC Symbol;Acc:HGNC:3473]	nonsense_mediated_decay,protein_coding,retained_intron	23.7527	-2.37719	0.542709	-4.38023	1.18554e-05	5.88819e-05
ENSG00000119771	KLHL29	kelch like family member 29 [Source:HGNC Symbol;Acc:HGNC:29404]	protein_coding,retained_intron	1792.59	-4.0562	0.0803013	-50.5123	0	0
ENSG00000119917	IFIT3	interferon induced protein with tetratricopeptide repeats 3 [Source:HGNC Symbol;Acc:HGNC:5411]	protein_coding	1675.77	3.40101	0.0829423	41.0045	0	0
ENSG00000119922	IFIT2	interferon induced protein with tetratricopeptide repeats 2 [Source:HGNC Symbol;Acc:HGNC:5409]	nonsense_mediated_decay,protein_coding,protein_coding_CDS_not_defined	1115.47	3.23074	0.207837	15.5446	1.73161e-54	6.31584e-53
ENSG00000120057	SFRP5	secreted frizzled related protein 5 [Source:HGNC Symbol;Acc:HGNC:10779]	protein_coding	3.29828	4.1356	1.60424	2.57792	0.00993968	0.0294557
ENSG00000120211	INSL4	insulin like 4 [Source:HGNC Symbol;Acc:HGNC:6087]	protein_coding	83.0269	5.94477	0.558001	10.6537	1.67585e-26	2.96426e-25
ENSG00000120254	MTHFD1L	methylenetetrahydrofolate dehydrogenase (NADP+ dependent) 1 like [Source:HGNC Symbol;Acc:HGNC:21055]	nonsense_mediated_decay,protein_coding,protein_coding_CDS_not_defined	4212.14	-1.54064	0.0426909	-36.0882	3.46905e-285	1.43286e-282
ENSG00000120256	LRP11	LDL receptor related protein 11 [Source:HGNC Symbol;Acc:HGNC:16936]	protein_coding,retained_intron	107.825	2.24886	0.239668	9.38324	6.3975e-21	9.08219e-20
ENSG00000120279	MYCT1	MYC target 1 [Source:HGNC Symbol;Acc:HGNC:23172]	protein_coding	220.224	3.79924	0.212999	17.8369	3.65367e-71	1.78965e-69
ENSG00000120440	TTLL2	tubulin tyrosine ligase like 2 [Source:HGNC Symbol;Acc:HGNC:21211]	nonsense_mediated_decay,protein_coding	11.2921	1.82151	0.722422	2.5214	0.011689	0.034023
ENSG00000120594	PLXDC2	plexin domain containing 2 [Source:HGNC Symbol;Acc:HGNC:21013]	protein_coding,protein_coding_CDS_not_defined	1379.58	-2.62266	0.0778171	-33.7029	5.23319e-249	1.63217e-246
ENSG00000120658	ENOX1	ecto-NOX disulfide-thiol exchanger 1 [Source:HGNC Symbol;Acc:HGNC:25474]	protein_coding,protein_coding_CDS_not_defined	41.0213	-2.81848	0.445301	-6.32937	2.46165e-10	1.92924e-09
ENSG00000120899	PTK2B	protein tyrosine kinase 2 beta [Source:HGNC Symbol;Acc:HGNC:9612]	protein_coding,protein_coding_CDS_not_defined,retained_intron	271.93	-1.64157	0.152901	-10.7361	6.88627e-27	1.2403e-25
ENSG00000120949	TNFRSF8	TNF receptor superfamily member 8 [Source:HGNC Symbol;Acc:HGNC:11923]	nonsense_mediated_decay,protein_coding,protein_coding_CDS_not_defined	110.428	2.24526	0.239678	9.36781	7.40521e-21	1.04739e-19
ENSG00000121207	LRAT	lecithin retinol acyltransferase [Source:HGNC Symbol;Acc:HGNC:6685]	protein_coding,protein_coding_CDS_not_defined,retained_intron	2.17791	4.57026	1.87874	2.43262	0.0149899	0.0423954
ENSG00000121297	TSHZ3	teashirt zinc finger homeobox 3 [Source:HGNC Symbol;Acc:HGNC:30700]	protein_coding,protein_coding_CDS_not_defined	1188.32	-3.38166	0.0937482	-36.0718	6.28517e-285	2.52771e-282
ENSG00000121335	PRB2	proline rich protein BstNI subfamily 2 [Source:HGNC Symbol;Acc:HGNC:9338]	protein_coding,protein_coding_CDS_not_defined	18.9216	-1.76497	0.546798	-3.22783	0.00124735	0.00451612
ENSG00000121440	PDZRN3	PDZ domain containing ring finger 3 [Source:HGNC Symbol;Acc:HGNC:17704]	protein_coding,protein_coding_CDS_not_defined,retained_intron	268.68	-2.6393	0.159505	-16.5468	1.68778e-61	7.00912e-60
ENSG00000121797	CCRL2	C-C motif chemokine receptor like 2 [Source:HGNC Symbol;Acc:HGNC:1612]	protein_coding,protein_coding_CDS_not_defined	41.2577	2.92436	0.447887	6.52924	6.61053e-11	5.38515e-10
ENSG00000121895	TMEM156	transmembrane protein 156 [Source:HGNC Symbol;Acc:HGNC:26260]	protein_coding,protein_coding_CDS_not_defined	34.4243	2.06799	0.415755	4.97406	6.55666e-07	3.75711e-06
ENSG00000121904	CSMD2	CUB and Sushi multiple domains 2 [Source:HGNC Symbol;Acc:HGNC:19290]	protein_coding,protein_coding_CDS_not_defined,retained_intron	240.193	-2.0493	0.164953	-12.4235	1.94797e-35	4.5941e-34
ENSG00000121964	GTDC1	glycosyltransferase like domain containing 1 [Source:HGNC Symbol;Acc:HGNC:20887]	nonsense_mediated_decay,protein_coding,protein_coding_CDS_not_defined,retained_intron	729.142	-2.13981	0.100381	-21.3169	7.92136e-101	5.80615e-99
ENSG00000122133	PAEP	progestagen associated endometrial protein [Source:HGNC Symbol;Acc:HGNC:8573]	nonsense_mediated_decay,protein_coding	32.5474	2.30671	0.422836	5.45532	4.88849e-08	3.16092e-07
ENSG00000122136	OBP2A	odorant binding protein 2A [Source:HGNC Symbol;Acc:HGNC:23380]	nonsense_mediated_decay,protein_coding	2.13802	4.54737	1.83772	2.47446	0.0133437	0.0381774
ENSG00000122376	SHLD2	shieldin complex subunit 2 [Source:HGNC Symbol;Acc:HGNC:28773]	protein_coding	1520.41	-1.51575	0.0652383	-23.2341	2.0608e-119	1.88025e-117
ENSG00000122870	BICC1	BicC family RNA binding protein 1 [Source:HGNC Symbol;Acc:HGNC:19351]	protein_coding,protein_coding_CDS_not_defined	1938.61	-3.22106	0.0804164	-40.0548	0	0
ENSG00000123405	NFE2	nuclear factor, erythroid 2 [Source:HGNC Symbol;Acc:HGNC:7780]	protein_coding	25.9088	2.85603	0.54004	5.28856	1.23286e-07	7.64501e-07
ENSG00000123500	COL10A1	collagen type X alpha 1 chain [Source:HGNC Symbol;Acc:HGNC:2185]	protein_coding	31.2678	2.08616	0.448572	4.65067	3.30854e-06	1.75382e-05
ENSG00000123610	TNFAIP6	TNF alpha induced protein 6 [Source:HGNC Symbol;Acc:HGNC:11898]	protein_coding,retained_intron	236.398	-2.07023	0.173146	-11.9565	6.00125e-33	1.31963e-31
ENSG00000123689	G0S2	G0/G1 switch 2 [Source:HGNC Symbol;Acc:HGNC:30229]	protein_coding	51.997	2.32939	0.356995	6.52499	6.80062e-11	5.5341e-10
ENSG00000123999	INHA	inhibin subunit alpha [Source:HGNC Symbol;Acc:HGNC:6065]	protein_coding,protein_coding_CDS_not_defined	21.1192	2.25697	0.545597	4.13669	3.52344e-05	0.000164068
ENSG00000124091	GCNT7	glucosaminyl (N-acetyl) transferase family member 7 [Source:HGNC Symbol;Acc:HGNC:16099]	protein_coding	32.7516	2.16227	0.446953	4.83781	1.31277e-06	7.28482e-06
ENSG00000124102	PI3	peptidase inhibitor 3 [Source:HGNC Symbol;Acc:HGNC:8947]	protein_coding	20.4887	2.21131	0.609672	3.62705	0.000286679	0.00116412
ENSG00000124151	NCOA3	nuclear receptor coactivator 3 [Source:HGNC Symbol;Acc:HGNC:7670]	protein_coding,protein_coding_CDS_not_defined	2586.5	-1.55398	0.0660572	-23.5248	2.27288e-122	2.11801e-120
ENSG00000124256	ZBP1	Z-DNA binding protein 1 [Source:HGNC Symbol;Acc:HGNC:16176]	protein_coding,protein_coding_CDS_not_defined,retained_intron	5.42819	5.89155	1.4713	4.00432	6.21966e-05	0.000280018
ENSG00000124299	PEPD	peptidase D [Source:HGNC Symbol;Acc:HGNC:8840]	nonsense_mediated_decay,protein_coding,protein_coding_CDS_not_defined,retained_intron	2560.19	-2.23891	0.0574512	-38.9706	0	0
ENSG00000124302	CHST8	carbohydrate sulfotransferase 8 [Source:HGNC Symbol;Acc:HGNC:15993]	protein_coding,protein_coding_CDS_not_defined	14.4126	-2.38972	0.670893	-3.56199	0.000368048	0.00146725
ENSG00000124507	PACSIN1	protein kinase C and casein kinase substrate in neurons 1 [Source:HGNC Symbol;Acc:HGNC:8570]	protein_coding,protein_coding_CDS_not_defined	26.0134	-1.60177	0.44891	-3.56814	0.000359526	0.0014359
ENSG00000124839	RAB17	RAB17, member RAS oncogene family [Source:HGNC Symbol;Acc:HGNC:16523]	nonsense_mediated_decay,protein_coding,protein_coding_CDS_not_defined,retained_intron	77.7481	1.57271	0.27133	5.7963	6.77945e-09	4.72983e-08
ENSG00000124915	MYRF-AS1	MYRF antisense RNA 1 [Source:HGNC Symbol;Acc:HGNC:24506]	lncRNA	27.7706	2.44916	0.546811	4.47899	7.49987e-06	3.8123e-05
ENSG00000125245	GPR18	G protein-coupled receptor 18 [Source:HGNC Symbol;Acc:HGNC:4472]	protein_coding,protein_coding_CDS_not_defined	46.4633	8.98795	1.21426	7.40202	1.34132e-13	1.29329e-12
ENSG00000125246	CLYBL	citramalyl-CoA lyase [Source:HGNC Symbol;Acc:HGNC:18355]	nonsense_mediated_decay,protein_coding	28.8599	-3.62853	0.559641	-6.48367	8.95197e-11	7.22707e-10
ENSG00000125414	MYH2	myosin heavy chain 2 [Source:HGNC Symbol;Acc:HGNC:7572]	protein_coding	38.2086	-1.52096	0.422542	-3.59956	0.000318758	0.00128466
ENSG00000125538	IL1B	interleukin 1 beta [Source:HGNC Symbol;Acc:HGNC:5992]	protein_coding,protein_coding_CDS_not_defined,retained_intron	4.12527	4.47436	1.52762	2.92898	0.00340078	0.0112898
ENSG00000125551	PLGLB2	plasminogen like B2 [Source:HGNC Symbol;Acc:HGNC:9073]	nonsense_mediated_decay,protein_coding,retained_intron	8.75917	-2.2984	0.838832	-2.74001	0.00614379	0.0192186
ENSG00000125851	PCSK2	proprotein convertase subtilisin/kexin type 2 [Source:HGNC Symbol;Acc:HGNC:8744]	protein_coding,protein_coding_CDS_not_defined	168.809	-2.96371	0.205452	-14.4253	3.58754e-47	1.12812e-45
ENSG00000126861	OMG	oligodendrocyte myelin glycoprotein [Source:HGNC Symbol;Acc:HGNC:8135]	protein_coding,protein_coding_CDS_not_defined,retained_intron	55.699	2.88613	0.353434	8.16597	3.1885e-16	3.60417e-15
ENSG00000127324	TSPAN8	tetraspanin 8 [Source:HGNC Symbol;Acc:HGNC:11855]	protein_coding,protein_coding_CDS_not_defined,retained_intron	39.0272	2.29114	0.424393	5.39862	6.71554e-08	4.28877e-07
ENSG00000127325	BEST3	bestrophin 3 [Source:HGNC Symbol;Acc:HGNC:17105]	nonsense_mediated_decay,protein_coding,protein_coding_CDS_not_defined	33.9286	1.8301	0.436707	4.19069	2.78113e-05	0.000131546
ENSG00000127507	ADGRE2	adhesion G protein-coupled receptor E2 [Source:HGNC Symbol;Acc:HGNC:3337]	nonsense_mediated_decay,protein_coding,protein_coding_CDS_not_defined,retained_intron	42.1942	1.54824	0.41873	3.69746	0.000217764	0.000901404
ENSG00000127720	METTL25	methyltransferase like 25 [Source:HGNC Symbol;Acc:HGNC:26228]	protein_coding,protein_coding_CDS_not_defined,retained_intron	79.6353	-1.56399	0.263801	-5.92867	3.054e-09	2.19688e-08
ENSG00000127863	TNFRSF19	TNF receptor superfamily member 19 [Source:HGNC Symbol;Acc:HGNC:11915]	protein_coding,protein_coding_CDS_not_defined	123.155	2.14523	0.224172	9.56957	1.07352e-21	1.57902e-20
ENSG00000127928	GNGT1	G protein subunit gamma transducin 1 [Source:HGNC Symbol;Acc:HGNC:4411]	protein_coding	164.922	-1.87143	0.223893	-8.35862	6.34578e-17	7.42284e-16
ENSG00000128271	ADORA2A	adenosine A2a receptor [Source:HGNC Symbol;Acc:HGNC:263]	protein_coding,protein_coding_CDS_not_defined	49.5903	-2.24978	0.348825	-6.44959	1.12154e-10	9.00682e-10
ENSG00000128284	APOL3	apolipoprotein L3 [Source:HGNC Symbol;Acc:HGNC:14868]	nonsense_mediated_decay,protein_coding,protein_coding_CDS_not_defined	84.016	2.24953	0.273791	8.21623	2.09993e-16	2.39673e-15
ENSG00000128285	MCHR1	melanin concentrating hormone receptor 1 [Source:HGNC Symbol;Acc:HGNC:4479]	protein_coding,protein_coding_CDS_not_defined	46.9948	2.78053	0.372186	7.47081	7.97026e-14	7.81807e-13
ENSG00000128294	TPST2	tyrosylprotein sulfotransferase 2 [Source:HGNC Symbol;Acc:HGNC:12021]	protein_coding	5641.09	-1.82801	0.0563158	-32.46	3.91842e-231	1.00644e-228
ENSG00000128482	RNF112	ring finger protein 112 [Source:HGNC Symbol;Acc:HGNC:12968]	protein_coding,protein_coding_CDS_not_defined,retained_intron	47.5408	-1.83639	0.337092	-5.44773	5.10174e-08	3.29185e-07
ENSG00000128573	FOXP2	forkhead box P2 [Source:HGNC Symbol;Acc:HGNC:13875]	nonsense_mediated_decay,protein_coding,protein_coding_CDS_not_defined	12.9045	-3.59597	0.837588	-4.29325	1.76077e-05	8.55882e-05
ENSG00000128833	MYO5C	myosin VC [Source:HGNC Symbol;Acc:HGNC:7604]	nonsense_mediated_decay,protein_coding,protein_coding_CDS_not_defined,retained_intron	15.2598	-3.03238	0.711234	-4.26356	2.01198e-05	9.71657e-05
ENSG00000128849	CGNL1	cingulin like 1 [Source:HGNC Symbol;Acc:HGNC:25931]	protein_coding,protein_coding_CDS_not_defined	520.972	-2.02054	0.10634	-19.0008	1.6798e-80	9.36918e-79
ENSG00000129116	PALLD	palladin, cytoskeletal associated protein [Source:HGNC Symbol;Acc:HGNC:17068]	protein_coding,retained_intron	15289.1	-2.01461	0.0445471	-45.2244	0	0
ENSG00000129151	BBOX1	gamma-butyrobetaine hydroxylase 1 [Source:HGNC Symbol;Acc:HGNC:964]	protein_coding,protein_coding_CDS_not_defined,retained_intron	11.8697	2.9919	0.868737	3.44397	0.000573246	0.00220615
ENSG00000129437	KLK14	kallikrein related peptidase 14 [Source:HGNC Symbol;Acc:HGNC:6362]	protein_coding	27.1406	1.53051	0.496679	3.08148	0.00205975	0.00716227
ENSG00000129654	FOXJ1	forkhead box J1 [Source:HGNC Symbol;Acc:HGNC:3816]	protein_coding	6.09011	2.66322	1.0516	2.53255	0.0113235	0.0330597
ENSG00000129673	AANAT	aralkylamine N-acetyltransferase [Source:HGNC Symbol;Acc:HGNC:19]	nonsense_mediated_decay,protein_coding	44.9763	1.91029	0.345049	5.5363	3.08929e-08	2.03412e-07
ENSG00000129682	FGF13	fibroblast growth factor 13 [Source:HGNC Symbol;Acc:HGNC:3670]	protein_coding	88.2657	-2.13896	0.26351	-8.11718	4.77152e-16	5.33827e-15
ENSG00000130035	GALNT8	polypeptide N-acetylgalactosaminyltransferase 8 [Source:HGNC Symbol;Acc:HGNC:4130]	protein_coding,protein_coding_CDS_not_defined	86.1288	-1.53324	0.252851	-6.0638	1.32939e-09	9.87675e-09
ENSG00000130518	IQCN	IQ motif containing N [Source:HGNC Symbol;Acc:HGNC:29350]	protein_coding,retained_intron	430.644	3.00579	0.31309	9.6004	7.96311e-22	1.17809e-20
ENSG00000130635	COL5A1	collagen type V alpha 1 chain [Source:HGNC Symbol;Acc:HGNC:2209]	protein_coding,protein_coding_CDS_not_defined,retained_intron	18639.5	-2.36879	0.0907672	-26.0974	3.90211e-150	4.82867e-148
ENSG00000131374	TBC1D5	TBC1 domain family member 5 [Source:HGNC Symbol;Acc:HGNC:19166]	nonsense_mediated_decay,protein_coding,protein_coding_CDS_not_defined	2367.05	-3.51034	0.0782767	-44.8453	0	0
ENSG00000131558	EXOC4	exocyst complex component 4 [Source:HGNC Symbol;Acc:HGNC:30389]	protein_coding,protein_coding_CDS_not_defined,retained_intron	1737.1	-1.8924	0.0684141	-27.6609	2.06235e-168	2.97338e-166
ENSG00000131634	TMEM204	transmembrane protein 204 [Source:HGNC Symbol;Acc:HGNC:14158]	protein_coding	13.4492	2.02849	0.732232	2.77029	0.0056007	0.0176899
ENSG00000131737	KRT34	keratin 34 [Source:HGNC Symbol;Acc:HGNC:6452]	protein_coding	535.61	2.36187	0.116396	20.2916	1.52612e-91	9.92463e-90
ENSG00000131746	TNS4	tensin 4 [Source:HGNC Symbol;Acc:HGNC:24352]	protein_coding,retained_intron	198.782	2.98999	0.200771	14.8926	3.68322e-50	1.2344e-48
ENSG00000131914	LIN28A	lin-28 homolog A [Source:HGNC Symbol;Acc:HGNC:15986]	protein_coding	2.16832	4.56464	1.84187	2.47826	0.0132023	0.0378155
ENSG00000132170	PPARG	peroxisome proliferator activated receptor gamma [Source:HGNC Symbol;Acc:HGNC:9236]	nonsense_mediated_decay,protein_coding,protein_coding_CDS_not_defined,retained_intron	560.439	-1.50301	0.103015	-14.5902	3.2429e-48	1.04556e-46
ENSG00000132394	EEFSEC	eukaryotic elongation factor, selenocysteine-tRNA specific [Source:HGNC Symbol;Acc:HGNC:24614]	protein_coding,protein_coding_CDS_not_defined	222.614	-3.75281	0.2058	-18.2352	2.71194e-74	1.38845e-72
ENSG00000132561	MATN2	matrilin 2 [Source:HGNC Symbol;Acc:HGNC:6908]	nonsense_mediated_decay,protein_coding,protein_coding_CDS_not_defined,retained_intron	1119.84	-1.52295	0.0760354	-20.0295	3.04994e-89	1.92209e-87
ENSG00000132570	PCBD2	pterin-4 alpha-carbinolamine dehydratase 2 [Source:HGNC Symbol;Acc:HGNC:24474]	nonsense_mediated_decay,protein_coding,protein_coding_CDS_not_defined	304.917	-2.23125	0.138627	-16.0954	2.74903e-58	1.08139e-56
ENSG00000132639	SNAP25	synaptosome associated protein 25 [Source:HGNC Symbol;Acc:HGNC:11132]	protein_coding,protein_coding_CDS_not_defined,retained_intron	275.988	-1.63884	0.14476	-11.3211	1.03213e-29	2.03924e-28
ENSG00000132670	PTPRA	protein tyrosine phosphatase receptor type A [Source:HGNC Symbol;Acc:HGNC:9664]	protein_coding	2674.48	-1.52483	0.0520225	-29.3109	7.53606e-189	1.33144e-186
ENSG00000132821	VSTM2L	V-set and transmembrane domain containing 2 like [Source:HGNC Symbol;Acc:HGNC:16096]	protein_coding	18.3939	-2.79958	0.64548	-4.3372	1.4431e-05	7.09135e-05
ENSG00000132855	ANGPTL3	angiopoietin like 3 [Source:HGNC Symbol;Acc:HGNC:491]	protein_coding,protein_coding_CDS_not_defined	5.62643	2.90521	1.12692	2.57802	0.00993689	0.0294503
ENSG00000132872	SYT4	synaptotagmin 4 [Source:HGNC Symbol;Acc:HGNC:11512]	protein_coding,protein_coding_CDS_not_defined	10.57	2.60383	0.79288	3.28401	0.00102342	0.00376649
ENSG00000132932	ATP8A2	ATPase phospholipid transporting 8A2 [Source:HGNC Symbol;Acc:HGNC:13533]	nonsense_mediated_decay,protein_coding,protein_coding_CDS_not_defined,retained_intron	316.349	-2.55449	0.151458	-16.866	8.00701e-64	3.46649e-62
ENSG00000133020	MYH8	myosin heavy chain 8 [Source:HGNC Symbol;Acc:HGNC:7578]	protein_coding	54.0286	-4.10479	0.439862	-9.33199	1.03901e-20	1.45675e-19
ENSG00000133027	PEMT	phosphatidylethanolamine N-methyltransferase [Source:HGNC Symbol;Acc:HGNC:8830]	nonsense_mediated_decay,protein_coding,protein_coding_CDS_not_defined	200.787	-2.19391	0.172709	-12.7029	5.69646e-37	1.40754e-35
ENSG00000133048	CHI3L1	chitinase 3 like 1 [Source:HGNC Symbol;Acc:HGNC:1932]	protein_coding,retained_intron	158.669	-1.7435	0.196837	-8.85758	8.17673e-19	1.04308e-17
ENSG00000133121	STARD13	StAR related lipid transfer domain containing 13 [Source:HGNC Symbol;Acc:HGNC:19164]	protein_coding,protein_coding_CDS_not_defined	969.315	-2.65685	0.0888996	-29.886	2.99239e-196	5.90079e-194
ENSG00000133195	SLC39A11	solute carrier family 39 member 11 [Source:HGNC Symbol;Acc:HGNC:14463]	nonsense_mediated_decay,protein_coding,protein_coding_CDS_not_defined,retained_intron	856.288	-1.82297	0.0886401	-20.5659	5.54089e-94	3.72214e-92
ENSG00000133216	EPHB2	EPH receptor B2 [Source:HGNC Symbol;Acc:HGNC:3393]	protein_coding,protein_coding_CDS_not_defined	2751.05	-2.94129	0.0601085	-48.9331	0	0
ENSG00000133317	LGALS12	galectin 12 [Source:HGNC Symbol;Acc:HGNC:15788]	protein_coding	4.48992	3.64733	1.42032	2.56796	0.0102298	0.0302014
ENSG00000133318	RTN3	reticulon 3 [Source:HGNC Symbol;Acc:HGNC:10469]	nonsense_mediated_decay,protein_coding,protein_coding_CDS_not_defined,retained_intron	5197.98	-1.95847	0.0411408	-47.6041	0	0
ENSG00000133321	PLAAT4	phospholipase A and acyltransferase 4 [Source:HGNC Symbol;Acc:HGNC:9869]	protein_coding,protein_coding_CDS_not_defined	9.9192	3.16655	0.877631	3.60807	0.000308487	0.00124622
ENSG00000133401	PDZD2	PDZ domain containing 2 [Source:HGNC Symbol;Acc:HGNC:18486]	protein_coding,protein_coding_CDS_not_defined,retained_intron	483.572	-1.92876	0.113833	-16.9437	2.1406e-64	9.33344e-63
ENSG00000133424	LARGE1	LARGE xylosyl- and glucuronyltransferase 1 [Source:HGNC Symbol;Acc:HGNC:6511]	nonsense_mediated_decay,protein_coding,protein_coding_CDS_not_defined,retained_intron	1692.66	-2.22541	0.0703047	-31.6538	6.72751e-220	1.6191e-217
ENSG00000133624	ZNF767P	zinc finger family member 767, pseudogene [Source:HGNC Symbol;Acc:HGNC:21884]	transcribed_unprocessed_pseudogene	147.442	-1.78992	0.201918	-8.86459	7.67832e-19	9.80727e-18
ENSG00000133812	SBF2	SET binding factor 2 [Source:HGNC Symbol;Acc:HGNC:2135]	nonsense_mediated_decay,protein_coding,protein_coding_CDS_not_defined,retained_intron	1858.61	-1.53433	0.0722945	-21.2233	5.81995e-100	4.18557e-98
ENSG00000134030	CTIF	cap binding complex dependent translation initiation factor [Source:HGNC Symbol;Acc:HGNC:23925]	protein_coding,protein_coding_CDS_not_defined,retained_intron	1838.12	-2.18774	0.0652287	-33.5395	1.27944e-246	3.91062e-244
ENSG00000134061	CD180	CD180 molecule [Source:HGNC Symbol;Acc:HGNC:6726]	protein_coding,retained_intron	151.497	-2.3786	0.216288	-10.9974	3.93382e-28	7.42205e-27
ENSG00000134070	IRAK2	interleukin 1 receptor associated kinase 2 [Source:HGNC Symbol;Acc:HGNC:6113]	protein_coding	121.375	1.73741	0.230441	7.53952	4.71705e-14	4.68715e-13
ENSG00000134115	CNTN6	contactin 6 [Source:HGNC Symbol;Acc:HGNC:2176]	nonsense_mediated_decay,protein_coding,retained_intron	8.95497	-4.09739	1.09194	-3.75241	0.000175146	0.000736257
ENSG00000134138	MEIS2	Meis homeobox 2 [Source:HGNC Symbol;Acc:HGNC:7001]	nonsense_mediated_decay,protein_coding,protein_coding_CDS_not_defined,retained_intron	299.425	-2.28131	0.148179	-15.3956	1.75183e-53	6.28459e-52
ENSG00000134240	HMGCS2	3-hydroxy-3-methylglutaryl-CoA synthase 2 [Source:HGNC Symbol;Acc:HGNC:5008]	protein_coding,protein_coding_CDS_not_defined	17.9023	-1.66298	0.536981	-3.09691	0.00195548	0.0068261
ENSG00000134242	PTPN22	protein tyrosine phosphatase non-receptor type 22 [Source:HGNC Symbol;Acc:HGNC:9652]	nonsense_mediated_decay,protein_coding,protein_coding_CDS_not_defined,retained_intron	77.2054	2.73158	0.307938	8.87056	7.27812e-19	9.30387e-18
ENSG00000134321	RSAD2	radical S-adenosyl methionine domain containing 2 [Source:HGNC Symbol;Acc:HGNC:30908]	nonsense_mediated_decay,protein_coding,protein_coding_CDS_not_defined,retained_intron	62.9417	4.16894	0.410098	10.1657	2.82064e-24	4.61032e-23
ENSG00000134470	IL15RA	interleukin 15 receptor subunit alpha [Source:HGNC Symbol;Acc:HGNC:5978]	protein_coding,protein_coding_CDS_not_defined	62.9735	3.54085	0.388462	9.11504	7.86384e-20	1.05513e-18
ENSG00000134533	RERG	RAS like estrogen regulated growth inhibitor [Source:HGNC Symbol;Acc:HGNC:15980]	protein_coding,protein_coding_CDS_not_defined,retained_intron	812.951	-1.77974	0.086068	-20.6783	5.43602e-95	3.69227e-93
ENSG00000134538	SLCO1B1	solute carrier organic anion transporter family member 1B1 [Source:HGNC Symbol;Acc:HGNC:10959]	protein_coding	7.303	-3.33049	1.02804	-3.23966	0.00119674	0.00434886
ENSG00000134551	PRH2	proline rich protein HaeIII subfamily 2 [Source:HGNC Symbol;Acc:HGNC:9367]	protein_coding	3.14948	-4.07078	1.67617	-2.42863	0.0151561	0.0428178
ENSG00000134775	FHOD3	formin homology 2 domain containing 3 [Source:HGNC Symbol;Acc:HGNC:26178]	protein_coding,retained_intron	161.628	-2.16775	0.192706	-11.249	2.34288e-29	4.58157e-28
ENSG00000134827	TCN1	transcobalamin 1 [Source:HGNC Symbol;Acc:HGNC:11652]	protein_coding,protein_coding_CDS_not_defined,retained_intron	231.876	1.64101	0.196695	8.34292	7.24781e-17	8.45802e-16
ENSG00000134830	C5AR2	complement C5a receptor 2 [Source:HGNC Symbol;Acc:HGNC:4527]	protein_coding	19.873	2.80272	0.582906	4.80818	1.52309e-06	8.39097e-06
ENSG00000135090	TAOK3	TAO kinase 3 [Source:HGNC Symbol;Acc:HGNC:18133]	protein_coding,protein_coding_CDS_not_defined,retained_intron	429.307	-1.81417	0.118307	-15.3343	4.50932e-53	1.60264e-51
ENSG00000135114	OASL	2'-5'-oligoadenylate synthetase like [Source:HGNC Symbol;Acc:HGNC:8090]	nonsense_mediated_decay,protein_coding,retained_intron	660.38	1.67321	0.108951	15.3574	3.16002e-53	1.13098e-51
ENSG00000135205	CCDC146	coiled-coil domain containing 146 [Source:HGNC Symbol;Acc:HGNC:29296]	protein_coding,protein_coding_CDS_not_defined,retained_intron	23.4669	-2.53492	0.556605	-4.55426	5.25702e-06	2.71604e-05
ENSG00000135218	CD36	CD36 molecule [Source:HGNC Symbol;Acc:HGNC:1663]	nonsense_mediated_decay,protein_coding,protein_coding_CDS_not_defined,retained_intron	47.6417	-1.56883	0.358637	-4.37442	1.21755e-05	6.03638e-05
ENSG00000135248	GARIN1B	golgi associated RAB2 interactor 1B [Source:HGNC Symbol;Acc:HGNC:30704]	nonsense_mediated_decay,protein_coding,protein_coding_CDS_not_defined,retained_intron	2.27887	4.64091	1.96389	2.36312	0.018122	0.0499489
ENSG00000135250	SRPK2	SRSF protein kinase 2 [Source:HGNC Symbol;Acc:HGNC:11306]	nonsense_mediated_decay,protein_coding,protein_coding_CDS_not_defined,retained_intron	2682.82	-1.91335	0.0575593	-33.2414	2.71884e-242	7.91442e-240
ENSG00000135299	ANKRD6	ankyrin repeat domain 6 [Source:HGNC Symbol;Acc:HGNC:17280]	nonsense_mediated_decay,protein_coding,protein_coding_CDS_not_defined,retained_intron	117.822	-2.35349	0.270383	-8.70429	3.19576e-18	3.98363e-17
ENSG00000135324	MRAP2	melanocortin 2 receptor accessory protein 2 [Source:HGNC Symbol;Acc:HGNC:21232]	protein_coding	28.1632	-2.17395	0.4708	-4.61757	3.88253e-06	2.0411e-05
ENSG00000135409	AMHR2	anti-Mullerian hormone receptor type 2 [Source:HGNC Symbol;Acc:HGNC:465]	protein_coding,retained_intron	5.62785	5.94227	1.45386	4.08723	4.36546e-05	0.000200899
ENSG00000135480	KRT7	keratin 7 [Source:HGNC Symbol;Acc:HGNC:6445]	protein_coding,protein_coding_CDS_not_defined,retained_intron	62.2368	1.79468	0.297783	6.02679	1.67244e-09	1.23176e-08
ENSG00000135540	NHSL1	NHS like 1 [Source:HGNC Symbol;Acc:HGNC:21021]	protein_coding,protein_coding_CDS_not_defined,retained_intron	305.765	-2.58084	0.145111	-17.7854	9.17752e-71	4.46673e-69
ENSG00000135750	KCNK1	potassium two pore domain channel subfamily K member 1 [Source:HGNC Symbol;Acc:HGNC:6272]	protein_coding,protein_coding_CDS_not_defined	1469.47	-1.83713	0.0725358	-25.3272	1.60307e-141	1.87731e-139
ENSG00000135898	GPR55	G protein-coupled receptor 55 [Source:HGNC Symbol;Acc:HGNC:4511]	nonsense_mediated_decay,protein_coding	78.7338	-2.79525	0.292028	-9.57184	1.05024e-21	1.54627e-20
ENSG00000135905	DOCK10	dedicator of cytokinesis 10 [Source:HGNC Symbol;Acc:HGNC:23479]	nonsense_mediated_decay,protein_coding,protein_coding_CDS_not_defined,retained_intron	420.799	-2.66351	0.125607	-21.2051	8.5753e-100	6.15268e-98
ENSG00000135914	HTR2B	5-hydroxytryptamine receptor 2B [Source:HGNC Symbol;Acc:HGNC:5294]	protein_coding	11.1259	3.34752	0.847485	3.94995	7.8168e-05	0.00034742
ENSG00000136155	SCEL	sciellin [Source:HGNC Symbol;Acc:HGNC:10573]	nonsense_mediated_decay,protein_coding,protein_coding_CDS_not_defined	662.25	1.69013	0.0951592	17.7611	1.41472e-70	6.86362e-69
ENSG00000136267	DGKB	diacylglycerol kinase beta [Source:HGNC Symbol;Acc:HGNC:2850]	protein_coding,protein_coding_CDS_not_defined,retained_intron	42.2915	-1.96769	0.364612	-5.39666	6.78938e-08	4.33321e-07
ENSG00000136514	RTP4	receptor transporter protein 4 [Source:HGNC Symbol;Acc:HGNC:23992]	protein_coding	42.759	1.94909	0.369442	5.27577	1.32197e-07	8.16781e-07
ENSG00000136631	VPS45	vacuolar protein sorting 45 homolog [Source:HGNC Symbol;Acc:HGNC:14579]	nonsense_mediated_decay,protein_coding,protein_coding_CDS_not_defined,retained_intron	1351.4	-1.58395	0.0710009	-22.3089	3.03135e-110	2.51093e-108
ENSG00000136634	IL10	interleukin 10 [Source:HGNC Symbol;Acc:HGNC:5962]	protein_coding,protein_coding_CDS_not_defined,retained_intron	6.15153	6.06968	1.44219	4.20865	2.56906e-05	0.000122177
ENSG00000136770	DNAJC1	DnaJ heat shock protein family (Hsp40) member C1 [Source:HGNC Symbol;Acc:HGNC:20090]	nonsense_mediated_decay,protein_coding,protein_coding_CDS_not_defined,retained_intron	3766.35	-1.81298	0.0473685	-38.2739	0	0
ENSG00000136828	RALGPS1	Ral GEF with PH domain and SH3 binding motif 1 [Source:HGNC Symbol;Acc:HGNC:16851]	protein_coding,protein_coding_CDS_not_defined,retained_intron	247.812	-1.50647	0.172008	-8.75813	1.98525e-18	2.48991e-17
ENSG00000136881	BAAT	bile acid-CoA:amino acid N-acyltransferase [Source:HGNC Symbol;Acc:HGNC:932]	nonsense_mediated_decay,protein_coding	37.5448	2.05202	0.394157	5.20611	1.92843e-07	1.16973e-06
ENSG00000136944	LMX1B	LIM homeobox transcription factor 1 beta [Source:HGNC Symbol;Acc:HGNC:6654]	protein_coding	134.346	-1.80647	0.214782	-8.41072	4.07509e-17	4.80908e-16
ENSG00000136999	CCN3	cellular communication network factor 3 [Source:HGNC Symbol;Acc:HGNC:7885]	protein_coding,retained_intron	6958.51	-1.91512	0.0400699	-47.7946	0	0
ENSG00000137198	GMPR	guanosine monophosphate reductase [Source:HGNC Symbol;Acc:HGNC:4376]	protein_coding,protein_coding_CDS_not_defined,retained_intron	15.5647	-3.88041	0.774228	-5.01197	5.38765e-07	3.11528e-06
ENSG00000137261	KIAA0319	KIAA0319 [Source:HGNC Symbol;Acc:HGNC:21580]	protein_coding	36.2732	-1.5438	0.380342	-4.05897	4.92895e-05	0.000225125
ENSG00000137265	IRF4	interferon regulatory factor 4 [Source:HGNC Symbol;Acc:HGNC:6119]	nonsense_mediated_decay,protein_coding,retained_intron	5.80117	-2.9688	1.10834	-2.6786	0.00739302	0.022667
ENSG00000137486	ARRB1	arrestin beta 1 [Source:HGNC Symbol;Acc:HGNC:711]	nonsense_mediated_decay,protein_coding,retained_intron	408.615	-1.68741	0.118753	-14.2093	8.02061e-46	2.44905e-44
ENSG00000137507	LRRC32	leucine rich repeat containing 32 [Source:HGNC Symbol;Acc:HGNC:4161]	protein_coding,protein_coding_CDS_not_defined	260.988	-4.2877	0.215023	-19.9406	1.80859e-88	1.13278e-86
ENSG00000137573	SULF1	sulfatase 1 [Source:HGNC Symbol;Acc:HGNC:20391]	nonsense_mediated_decay,protein_coding,protein_coding_CDS_not_defined,retained_intron	105.164	-1.52985	0.240075	-6.37238	1.86115e-10	1.47221e-09
ENSG00000137628	DDX60	DExD/H-box helicase 60 [Source:HGNC Symbol;Acc:HGNC:25942]	nonsense_mediated_decay,protein_coding,protein_coding_CDS_not_defined,retained_intron	667.199	2.26077	0.108611	20.8154	3.14209e-96	2.1679e-94
ENSG00000137693	YAP1	Yes1 associated transcriptional regulator [Source:HGNC Symbol;Acc:HGNC:16262]	protein_coding,protein_coding_CDS_not_defined,retained_intron	5261.58	-1.5195	0.0426428	-35.6332	4.28395e-278	1.63674e-275
ENSG00000137699	TRIM29	tripartite motif containing 29 [Source:HGNC Symbol;Acc:HGNC:17274]	nonsense_mediated_decay,protein_coding,protein_coding_CDS_not_defined,retained_intron	332.802	1.9134	0.140811	13.5885	4.68776e-42	1.32423e-40
ENSG00000137707	BTG4	BTG anti-proliferation factor 4 [Source:HGNC Symbol;Acc:HGNC:13862]	protein_coding	6.76667	2.84446	1.01635	2.7987	0.00513086	0.0163564
ENSG00000137745	MMP13	matrix metallopeptidase 13 [Source:HGNC Symbol;Acc:HGNC:7159]	protein_coding	1452.49	1.50986	0.0782436	19.2969	5.7076e-83	3.27919e-81
ENSG00000137801	THBS1	thrombospondin 1 [Source:HGNC Symbol;Acc:HGNC:11785]	protein_coding,retained_intron	27104.9	-1.88567	0.0365019	-51.6595	0	0
ENSG00000137843	PAK6	p21 (RAC1) activated kinase 6 [Source:HGNC Symbol;Acc:HGNC:16061]	protein_coding,protein_coding_CDS_not_defined,retained_intron	66.7771	1.63693	0.284009	5.76366	8.23094e-09	5.6944e-08
ENSG00000137959	IFI44L	interferon induced protein 44 like [Source:HGNC Symbol;Acc:HGNC:17817]	nonsense_mediated_decay,protein_coding,protein_coding_CDS_not_defined,retained_intron	328.737	1.98427	0.142437	13.9308	4.1153e-44	1.21413e-42
ENSG00000137965	IFI44	interferon induced protein 44 [Source:HGNC Symbol;Acc:HGNC:16938]	protein_coding,protein_coding_CDS_not_defined,retained_intron	1775.7	1.59744	0.0612635	26.0749	7.02068e-150	8.61796e-148
ENSG00000138100	TRIM54	tripartite motif containing 54 [Source:HGNC Symbol;Acc:HGNC:16008]	protein_coding,retained_intron	31.4676	1.56139	0.410377	3.80476	0.000141942	0.000605929
ENSG00000138193	PLCE1	phospholipase C epsilon 1 [Source:HGNC Symbol;Acc:HGNC:17175]	nonsense_mediated_decay,protein_coding,protein_coding_CDS_not_defined,retained_intron	3932.89	-1.85863	0.0554236	-33.535	1.48838e-246	4.50419e-244
ENSG00000138347	MYPN	myopalladin [Source:HGNC Symbol;Acc:HGNC:23246]	nonsense_mediated_decay,protein_coding,protein_coding_CDS_not_defined,retained_intron	20.7117	1.79012	0.535458	3.34316	0.000828306	0.00309946
ENSG00000138379	MSTN	myostatin [Source:HGNC Symbol;Acc:HGNC:4223]	protein_coding	5.96037	-3.01267	1.08555	-2.77525	0.00551588	0.0174455
ENSG00000138646	HERC5	HECT and RLD domain containing E3 ubiquitin protein ligase 5 [Source:HGNC Symbol;Acc:HGNC:24368]	protein_coding,protein_coding_CDS_not_defined,retained_intron	2.32566	4.66654	1.78617	2.61259	0.0089859	0.0269771
ENSG00000138696	BMPR1B	bone morphogenetic protein receptor type 1B [Source:HGNC Symbol;Acc:HGNC:1077]	protein_coding,protein_coding_CDS_not_defined	382.862	-2.11449	0.125967	-16.786	3.08721e-63	1.32715e-61
ENSG00000138758	SEPTIN11	septin 11 [Source:HGNC Symbol;Acc:HGNC:25589]	protein_coding,protein_coding_CDS_not_defined,retained_intron	11590.3	-2.59418	0.0471362	-55.0359	0	0
ENSG00000138944	SHISAL1	shisa like 1 [Source:HGNC Symbol;Acc:HGNC:29335]	protein_coding	235.681	-1.61437	0.15511	-10.4079	2.28189e-25	3.8899e-24
ENSG00000139044	B4GALNT3	beta-1,4-N-acetyl-galactosaminyltransferase 3 [Source:HGNC Symbol;Acc:HGNC:24137]	protein_coding,protein_coding_CDS_not_defined,retained_intron	340.882	-1.55143	0.12602	-12.311	7.9075e-35	1.83937e-33
ENSG00000139173	TMEM117	transmembrane protein 117 [Source:HGNC Symbol;Acc:HGNC:25308]	nonsense_mediated_decay,protein_coding,protein_coding_CDS_not_defined,retained_intron	199.847	-3.98178	0.228137	-17.4535	3.24048e-68	1.51677e-66
ENSG00000139174	PRICKLE1	prickle planar cell polarity protein 1 [Source:HGNC Symbol;Acc:HGNC:17019]	protein_coding,protein_coding_CDS_not_defined,retained_intron	797.139	-1.81689	0.0878053	-20.6922	4.06835e-95	2.78186e-93
ENSG00000139263	LRIG3	leucine rich repeats and immunoglobulin like domains 3 [Source:HGNC Symbol;Acc:HGNC:30991]	nonsense_mediated_decay,protein_coding,retained_intron	1315.5	-1.61955	0.0783015	-20.6836	4.872e-95	3.31654e-93
ENSG00000139318	DUSP6	dual specificity phosphatase 6 [Source:HGNC Symbol;Acc:HGNC:3072]	protein_coding,protein_coding_CDS_not_defined	16.4078	-3.95539	0.76586	-5.16463	2.40912e-07	1.44382e-06
ENSG00000139352	ASCL1	achaete-scute family bHLH transcription factor 1 [Source:HGNC Symbol;Acc:HGNC:738]	protein_coding	8.80416	-5.60232	1.35985	-4.11979	3.79218e-05	0.000176045
ENSG00000139567	ACVRL1	activin A receptor like type 1 [Source:HGNC Symbol;Acc:HGNC:175]	protein_coding,protein_coding_CDS_not_defined,retained_intron	14.5473	1.8576	0.665188	2.7926	0.00522859	0.0166384
ENSG00000139626	ITGB7	integrin subunit beta 7 [Source:HGNC Symbol;Acc:HGNC:6162]	nonsense_mediated_decay,protein_coding,retained_intron	14.0137	1.68903	0.627328	2.69242	0.00709352	0.0218584
ENSG00000139648	KRT71	keratin 71 [Source:HGNC Symbol;Acc:HGNC:28927]	protein_coding	45.5683	2.35027	0.37273	6.30557	2.87144e-10	2.24121e-09
ENSG00000139714	MORN3	MORN repeat containing 3 [Source:HGNC Symbol;Acc:HGNC:29807]	nonsense_mediated_decay,protein_coding	21.5258	-1.50861	0.531215	-2.83993	0.0045124	0.0145625
ENSG00000139910	NOVA1	NOVA alternative splicing regulator 1 [Source:HGNC Symbol;Acc:HGNC:7886]	nonsense_mediated_decay,protein_coding,protein_coding_CDS_not_defined,retained_intron	385.489	-2.08623	0.145756	-14.3132	1.8104e-46	5.5781e-45
ENSG00000139970	RTN1	reticulon 1 [Source:HGNC Symbol;Acc:HGNC:10467]	protein_coding,protein_coding_CDS_not_defined,retained_intron	351.877	-4.18395	0.175008	-23.9072	2.57869e-126	2.5262e-124
ENSG00000140015	KCNH5	potassium voltage-gated channel subfamily H member 5 [Source:HGNC Symbol;Acc:HGNC:6254]	protein_coding,retained_intron	68.5979	-1.75186	0.282752	-6.19574	5.80117e-10	4.42508e-09
ENSG00000140254	DUOXA1	dual oxidase maturation factor 1 [Source:HGNC Symbol;Acc:HGNC:26507]	nonsense_mediated_decay,protein_coding,protein_coding_CDS_not_defined	16.3244	2.59803	0.673211	3.85916	0.000113775	0.000493268
ENSG00000140368	PSTPIP1	proline-serine-threonine phosphatase interacting protein 1 [Source:HGNC Symbol;Acc:HGNC:9580]	nonsense_mediated_decay,protein_coding,protein_coding_CDS_not_defined,retained_intron	8.45995	2.03245	0.830769	2.44646	0.0144266	0.0409422
ENSG00000140379	BCL2A1	BCL2 related protein A1 [Source:HGNC Symbol;Acc:HGNC:991]	protein_coding	38.7597	2.23543	0.410021	5.45197	4.98139e-08	3.22031e-07
ENSG00000140538	NTRK3	neurotrophic receptor tyrosine kinase 3 [Source:HGNC Symbol;Acc:HGNC:8033]	nonsense_mediated_decay,protein_coding,protein_coding_CDS_not_defined	441.044	-1.75038	0.120366	-14.5421	6.55375e-48	2.09974e-46
ENSG00000140557	ST8SIA2	ST8 alpha-N-acetyl-neuraminide alpha-2,8-sialyltransferase 2 [Source:HGNC Symbol;Acc:HGNC:10870]	protein_coding,retained_intron	22.5009	-2.15964	0.516395	-4.18214	2.8878e-05	0.000136191
ENSG00000140600	SH3GL3	SH3 domain containing GRB2 like 3, endophilin A3 [Source:HGNC Symbol;Acc:HGNC:10832]	nonsense_mediated_decay,protein_coding,protein_coding_CDS_not_defined,retained_intron	122.572	-2.17075	0.223799	-9.69956	3.0281e-22	4.55257e-21
ENSG00000140718	FTO	FTO alpha-ketoglutarate dependent dioxygenase [Source:HGNC Symbol;Acc:HGNC:24678]	nonsense_mediated_decay,protein_coding,protein_coding_CDS_not_defined	1855.97	-3.08402	0.0710242	-43.4222	0	0
ENSG00000140749	IGSF6	immunoglobulin superfamily member 6 [Source:HGNC Symbol;Acc:HGNC:5953]	protein_coding,retained_intron	31.2929	2.46258	0.451989	5.44833	5.08463e-08	3.28219e-07
ENSG00000140937	CDH11	cadherin 11 [Source:HGNC Symbol;Acc:HGNC:1750]	protein_coding,protein_coding_CDS_not_defined,retained_intron	2196.22	-2.14128	0.0741385	-28.8821	2.00307e-183	3.36395e-181
ENSG00000140945	CDH13	cadherin 13 [Source:HGNC Symbol;Acc:HGNC:1753]	nonsense_mediated_decay,protein_coding,protein_coding_CDS_not_defined,retained_intron	1277.11	-2.69655	0.0965962	-27.9157	1.72169e-171	2.52998e-169
ENSG00000141052	MYOCD	myocardin [Source:HGNC Symbol;Acc:HGNC:16067]	nonsense_mediated_decay,protein_coding,retained_intron	61.8788	-1.78654	0.320518	-5.57393	2.49055e-08	1.65127e-07
ENSG00000141298	SSH2	slingshot protein phosphatase 2 [Source:HGNC Symbol;Acc:HGNC:30580]	nonsense_mediated_decay,protein_coding,retained_intron	1087.83	-2.22309	0.0820218	-27.1037	8.91018e-162	1.2104e-159
ENSG00000141338	ABCA8	ATP binding cassette subfamily A member 8 [Source:HGNC Symbol;Acc:HGNC:38]	non_stop_decay,protein_coding,retained_intron	28.2401	1.65338	0.478307	3.45673	0.00054677	0.00211304
ENSG00000141449	GREB1L	GREB1 like retinoic acid receptor coactivator [Source:HGNC Symbol;Acc:HGNC:31042]	protein_coding,protein_coding_CDS_not_defined,retained_intron	158.071	-2.52202	0.200546	-12.5757	2.87118e-36	6.95386e-35
ENSG00000141574	SECTM1	secreted and transmembrane 1 [Source:HGNC Symbol;Acc:HGNC:10707]	nonsense_mediated_decay,protein_coding	28.5269	-1.6294	0.45224	-3.60295	0.000314622	0.00126933
ENSG00000141579	ZNF750	zinc finger protein 750 [Source:HGNC Symbol;Acc:HGNC:25843]	protein_coding	15.9811	3.11183	0.687327	4.52744	5.9702e-06	3.06791e-05
ENSG00000141627	DYM	dymeclin [Source:HGNC Symbol;Acc:HGNC:21317]	nonsense_mediated_decay,protein_coding,protein_coding_CDS_not_defined,retained_intron	783.829	-1.83318	0.0887739	-20.65	9.77201e-95	6.62265e-93
ENSG00000141968	VAV1	vav guanine nucleotide exchange factor 1 [Source:HGNC Symbol;Acc:HGNC:12657]	protein_coding,retained_intron	124.325	2.02417	0.219173	9.23549	2.57097e-20	3.52542e-19
ENSG00000142224	IL19	interleukin 19 [Source:HGNC Symbol;Acc:HGNC:5990]	protein_coding,protein_coding_CDS_not_defined,retained_intron	11.3808	4.01353	1.03197	3.8892	0.000100575	0.000439154
ENSG00000142405	NLRP12	NLR family pyrin domain containing 12 [Source:HGNC Symbol;Acc:HGNC:22938]	protein_coding,retained_intron	3.95444	3.45462	1.45215	2.37896	0.0173615	0.048158
ENSG00000142494	SLC47A1	solute carrier family 47 member 1 [Source:HGNC Symbol;Acc:HGNC:25588]	protein_coding,protein_coding_CDS_not_defined,retained_intron	19.3319	1.66565	0.546642	3.04706	0.00231095	0.00795447
ENSG00000142583	SLC2A5	solute carrier family 2 member 5 [Source:HGNC Symbol;Acc:HGNC:11010]	protein_coding,retained_intron	2.47853	4.75956	1.75821	2.70705	0.00678844	0.0210272
ENSG00000142623	PADI1	peptidyl arginine deiminase 1 [Source:HGNC Symbol;Acc:HGNC:18367]	protein_coding,protein_coding_CDS_not_defined,retained_intron	78.2985	1.50299	0.28009	5.3661	8.04563e-08	5.09245e-07
ENSG00000142655	PEX14	peroxisomal biogenesis factor 14 [Source:HGNC Symbol;Acc:HGNC:8856]	protein_coding,protein_coding_CDS_not_defined,retained_intron	737.312	-1.53012	0.095265	-16.0617	4.73359e-58	1.85252e-56
ENSG00000142959	BEST4	bestrophin 4 [Source:HGNC Symbol;Acc:HGNC:17106]	protein_coding	23.2091	1.64334	0.518672	3.16836	0.001533	0.00545982
ENSG00000143119	CD53	CD53 molecule [Source:HGNC Symbol;Acc:HGNC:1686]	protein_coding,protein_coding_CDS_not_defined	9.0571	2.34145	0.81818	2.86177	0.00421279	0.0136866
ENSG00000143184	XCL1	X-C motif chemokine ligand 1 [Source:HGNC Symbol;Acc:HGNC:10645]	protein_coding	40.4165	-2.27224	0.37812	-6.00931	1.8632e-09	1.36699e-08
ENSG00000143185	XCL2	X-C motif chemokine ligand 2 [Source:HGNC Symbol;Acc:HGNC:10646]	protein_coding	20.9073	-1.74638	0.511829	-3.41204	0.000644787	0.00246011
ENSG00000143195	ILDR2	immunoglobulin like domain containing receptor 2 [Source:HGNC Symbol;Acc:HGNC:18131]	protein_coding,protein_coding_CDS_not_defined	5190.86	-1.59566	0.0444618	-35.8884	4.64027e-282	1.79532e-279
ENSG00000143248	RGS5	regulator of G protein signaling 5 [Source:HGNC Symbol;Acc:HGNC:10001]	protein_coding,protein_coding_CDS_not_defined,retained_intron	114.279	-2.51783	0.241909	-10.4082	2.27547e-25	3.88112e-24
ENSG00000143365	RORC	RAR related orphan receptor C [Source:HGNC Symbol;Acc:HGNC:10260]	nonsense_mediated_decay,protein_coding,retained_intron	21.0093	1.68502	0.533283	3.15971	0.00157927	0.00561219
ENSG00000143382	ADAMTSL4	ADAMTS like 4 [Source:HGNC Symbol;Acc:HGNC:19706]	protein_coding,protein_coding_CDS_not_defined,retained_intron	729.759	1.81987	0.108787	16.7288	8.07968e-63	3.44429e-61
ENSG00000143473	KCNH1	potassium voltage-gated channel subfamily H member 1 [Source:HGNC Symbol;Acc:HGNC:6250]	nonsense_mediated_decay,protein_coding,protein_coding_CDS_not_defined,retained_intron	18.4434	-1.63987	0.559803	-2.92937	0.00339654	0.0112781
ENSG00000143520	FLG2	filaggrin 2 [Source:HGNC Symbol;Acc:HGNC:33276]	protein_coding	66.7012	4.18166	0.406992	10.2746	9.17561e-25	1.52835e-23
ENSG00000143632	ACTA1	actin alpha 1, skeletal muscle [Source:HGNC Symbol;Acc:HGNC:129]	protein_coding	14.9017	1.80327	0.595212	3.02962	0.0024486	0.00837808
ENSG00000143858	SYT2	synaptotagmin 2 [Source:HGNC Symbol;Acc:HGNC:11510]	protein_coding	267.765	-1.81639	0.154591	-11.7497	7.0905e-32	1.49669e-30
ENSG00000143995	MEIS1	Meis homeobox 1 [Source:HGNC Symbol;Acc:HGNC:7000]	protein_coding,protein_coding_CDS_not_defined,retained_intron	891.618	-1.54637	0.0845577	-18.2877	1.03692e-74	5.35364e-73
ENSG00000144036	EXOC6B	exocyst complex component 6B [Source:HGNC Symbol;Acc:HGNC:17085]	nonsense_mediated_decay,protein_coding,protein_coding_CDS_not_defined	2123.87	-1.94244	0.064645	-30.0477	2.33658e-198	4.6375e-196
ENSG00000144152	FBLN7	fibulin 7 [Source:HGNC Symbol;Acc:HGNC:26740]	protein_coding,protein_coding_CDS_not_defined	44.0594	-2.72469	0.407941	-6.67912	2.40379e-11	2.01182e-10
ENSG00000144218	AFF3	AF4/FMR2 family member 3 [Source:HGNC Symbol;Acc:HGNC:6473]	nonsense_mediated_decay,protein_coding,protein_coding_CDS_not_defined,retained_intron	1743.93	-2.20403	0.074511	-29.5799	2.71076e-192	5.08309e-190
ENSG00000144227	NXPH2	neurexophilin 2 [Source:HGNC Symbol;Acc:HGNC:8076]	protein_coding	85.7944	-3.11107	0.310603	-10.0162	1.29338e-23	2.07191e-22
ENSG00000144229	THSD7B	thrombospondin type 1 domain containing 7B [Source:HGNC Symbol;Acc:HGNC:29348]	nonsense_mediated_decay,protein_coding,protein_coding_CDS_not_defined,retained_intron	307.008	-3.04377	0.161667	-18.8274	4.50491e-79	2.4588e-77
ENSG00000144230	GPR17	G protein-coupled receptor 17 [Source:HGNC Symbol;Acc:HGNC:4471]	protein_coding,protein_coding_CDS_not_defined	131.1	1.81394	0.208767	8.68883	3.66194e-18	4.55173e-17
ENSG00000144278	GALNT13	polypeptide N-acetylgalactosaminyltransferase 13 [Source:HGNC Symbol;Acc:HGNC:23242]	nonsense_mediated_decay,protein_coding,protein_coding_CDS_not_defined,retained_intron	196.534	-2.86896	0.189548	-15.1358	9.40728e-52	3.25632e-50
ENSG00000144283	PKP4	plakophilin 4 [Source:HGNC Symbol;Acc:HGNC:9026]	nonsense_mediated_decay,protein_coding,protein_coding_CDS_not_defined,retained_intron	2690.14	-2.89648	0.0571691	-50.6652	0	0
ENSG00000144468	RHBDD1	rhomboid domain containing 1 [Source:HGNC Symbol;Acc:HGNC:23081]	protein_coding,protein_coding_CDS_not_defined,retained_intron	868.992	-1.85659	0.0860049	-21.587	2.38033e-103	1.80533e-101
ENSG00000144619	CNTN4	contactin 4 [Source:HGNC Symbol;Acc:HGNC:2174]	nonsense_mediated_decay,protein_coding,protein_coding_CDS_not_defined,retained_intron	237.488	-1.96122	0.162632	-12.0592	1.73455e-33	3.89254e-32
ENSG00000144642	RBMS3	RNA binding motif single stranded interacting protein 3 [Source:HGNC Symbol;Acc:HGNC:13427]	nonsense_mediated_decay,protein_coding,protein_coding_CDS_not_defined,retained_intron	626.276	-3.76993	0.128027	-29.4463	1.4028e-190	2.56747e-188
ENSG00000144645	OSBPL10	oxysterol binding protein like 10 [Source:HGNC Symbol;Acc:HGNC:16395]	protein_coding,protein_coding_CDS_not_defined,retained_intron	13520.4	-1.81321	0.0398089	-45.5479	0	0
ENSG00000144648	ACKR2	atypical chemokine receptor 2 [Source:HGNC Symbol;Acc:HGNC:1565]	protein_coding,protein_coding_CDS_not_defined	11.7638	2.02838	0.763748	2.65582	0.00791162	0.0240568
ENSG00000144681	STAC	SH3 and cysteine rich domain [Source:HGNC Symbol;Acc:HGNC:11353]	nonsense_mediated_decay,protein_coding,protein_coding_CDS_not_defined,retained_intron	811.116	-2.67871	0.0985751	-27.1743	1.30598e-162	1.80621e-160
ENSG00000144724	PTPRG	protein tyrosine phosphatase receptor type G [Source:HGNC Symbol;Acc:HGNC:9671]	protein_coding,protein_coding_CDS_not_defined,retained_intron	3571.31	-2.54607	0.0553911	-45.9653	0	0
ENSG00000144810	COL8A1	collagen type VIII alpha 1 chain [Source:HGNC Symbol;Acc:HGNC:2215]	protein_coding,protein_coding_CDS_not_defined	1738.59	-3.90908	0.155588	-25.1245	2.68496e-139	3.09682e-137
ENSG00000144821	MYH15	myosin heavy chain 15 [Source:HGNC Symbol;Acc:HGNC:31073]	protein_coding,protein_coding_CDS_not_defined,retained_intron	374.28	2.03761	0.130064	15.6663	2.57255e-55	9.54248e-54
ENSG00000145012	LPP	LIM domain containing preferred translocation partner in lipoma [Source:HGNC Symbol;Acc:HGNC:6679]	protein_coding,protein_coding_CDS_not_defined	3233.46	-1.94968	0.0613628	-31.773	1.53025e-221	3.71206e-219
ENSG00000145147	SLIT2	slit guidance ligand 2 [Source:HGNC Symbol;Acc:HGNC:11086]	protein_coding,protein_coding_CDS_not_defined,retained_intron	694.535	-1.54121	0.0913958	-16.863	8.41556e-64	3.63821e-62
ENSG00000145244	CORIN	corin, serine peptidase [Source:HGNC Symbol;Acc:HGNC:19012]	protein_coding,protein_coding_CDS_not_defined,retained_intron	113.654	-2.67597	0.242909	-11.0164	3.18662e-28	6.04212e-27
ENSG00000145284	SCD5	stearoyl-CoA desaturase 5 [Source:HGNC Symbol;Acc:HGNC:21088]	protein_coding	1372.3	-2.01528	0.0720647	-27.9649	4.34332e-172	6.50753e-170
ENSG00000145362	ANK2	ankyrin 2 [Source:HGNC Symbol;Acc:HGNC:493]	nonsense_mediated_decay,protein_coding,protein_coding_CDS_not_defined,retained_intron	437.873	-2.72777	0.133182	-20.4816	3.14128e-93	2.10556e-91
ENSG00000145416	MARCHF1	membrane associated ring-CH-type finger 1 [Source:HGNC Symbol;Acc:HGNC:26077]	nonsense_mediated_decay,protein_coding,protein_coding_CDS_not_defined,retained_intron	170.704	-1.52074	0.198325	-7.6679	1.74829e-14	1.78657e-13
ENSG00000145681	HAPLN1	hyaluronan and proteoglycan link protein 1 [Source:HGNC Symbol;Acc:HGNC:2380]	protein_coding	21521.3	-1.89394	0.0417523	-45.3613	0	0
ENSG00000145687	SSBP2	single stranded DNA binding protein 2 [Source:HGNC Symbol;Acc:HGNC:15831]	protein_coding,protein_coding_CDS_not_defined,retained_intron	830.569	-1.75295	0.0900342	-19.4698	1.9811e-84	1.17123e-82
ENSG00000145730	PAM	peptidylglycine alpha-amidating monooxygenase [Source:HGNC Symbol;Acc:HGNC:8596]	nonsense_mediated_decay,protein_coding,protein_coding_CDS_not_defined,retained_intron	9033.24	-1.58935	0.0422211	-37.6434	0	0
ENSG00000145743	FBXL17	F-box and leucine rich repeat protein 17 [Source:HGNC Symbol;Acc:HGNC:13615]	protein_coding,retained_intron	864.9	-2.16077	0.087318	-24.746	3.42672e-135	3.74063e-133
ENSG00000145757	SPATA9	spermatogenesis associated 9 [Source:HGNC Symbol;Acc:HGNC:22988]	nonsense_mediated_decay,protein_coding,protein_coding_CDS_not_defined	14.1038	1.6044	0.625483	2.56506	0.0103157	0.0304137
ENSG00000145781	COMMD10	COMM domain containing 10 [Source:HGNC Symbol;Acc:HGNC:30201]	nonsense_mediated_decay,protein_coding,protein_coding_CDS_not_defined	1023.19	-2.6902	0.0865297	-31.0899	3.30267e-212	7.26231e-210
ENSG00000145824	CXCL14	C-X-C motif chemokine ligand 14 [Source:HGNC Symbol;Acc:HGNC:10640]	protein_coding	10301.9	-2.86567	0.100137	-28.6176	4.06202e-180	6.67504e-178
ENSG00000145864	GABRB2	gamma-aminobutyric acid type A receptor subunit beta2 [Source:HGNC Symbol;Acc:HGNC:4082]	nonsense_mediated_decay,protein_coding,protein_coding_CDS_not_defined,retained_intron	200.82	-2.45084	0.185838	-13.188	1.02851e-39	2.72648e-38
ENSG00000145934	TENM2	teneurin transmembrane protein 2 [Source:HGNC Symbol;Acc:HGNC:29943]	nonsense_mediated_decay,protein_coding,protein_coding_CDS_not_defined,retained_intron	13487.5	-2.54947	0.0859281	-29.6698	1.88404e-193	3.57675e-191
ENSG00000145996	CDKAL1	CDK5 regulatory subunit associated protein 1 like 1 [Source:HGNC Symbol;Acc:HGNC:21050]	protein_coding,protein_coding_CDS_not_defined	646.17	-1.66677	0.0961581	-17.3337	2.62082e-67	1.21188e-65
ENSG00000146006	LRRTM2	leucine rich repeat transmembrane neuronal 2 [Source:HGNC Symbol;Acc:HGNC:19409]	protein_coding,protein_coding_CDS_not_defined	5.14154	3.85792	1.36501	2.8263	0.00470893	0.0151312
ENSG00000146166	LGSN	lengsin, lens protein with glutamine synthetase domain [Source:HGNC Symbol;Acc:HGNC:21016]	protein_coding	25.6607	-2.12711	0.476308	-4.46582	7.97608e-06	4.04361e-05
ENSG00000146276	GABRR1	gamma-aminobutyric acid type A receptor subunit rho1 [Source:HGNC Symbol;Acc:HGNC:4090]	nonsense_mediated_decay,protein_coding,protein_coding_CDS_not_defined	76.7662	-3.05214	0.313724	-9.72875	2.27365e-22	3.44201e-21
ENSG00000146373	RNF217	ring finger protein 217 [Source:HGNC Symbol;Acc:HGNC:21487]	nonsense_mediated_decay,protein_coding,protein_coding_CDS_not_defined,retained_intron	2425.57	-2.21146	0.0663236	-33.3434	9.06575e-244	2.66437e-241
ENSG00000146555	SDK1	sidekick cell adhesion molecule 1 [Source:HGNC Symbol;Acc:HGNC:19307]	protein_coding,protein_coding_CDS_not_defined,retained_intron	1921.3	-4.05722	0.0885588	-45.8138	0	0
ENSG00000146648	EGFR	epidermal growth factor receptor [Source:HGNC Symbol;Acc:HGNC:3236]	protein_coding,protein_coding_CDS_not_defined,retained_intron	845.203	-2.01889	0.0877057	-23.019	3.00974e-117	2.6742e-115
ENSG00000146776	ATXN7L1	ataxin 7 like 1 [Source:HGNC Symbol;Acc:HGNC:22210]	nonsense_mediated_decay,protein_coding,protein_coding_CDS_not_defined,retained_intron	240.796	-1.94153	0.15519	-12.5107	6.52331e-36	1.56258e-34
ENSG00000146938	NLGN4X	neuroligin 4 X-linked [Source:HGNC Symbol;Acc:HGNC:14287]	protein_coding,protein_coding_CDS_not_defined	646.914	-2.13033	0.102091	-20.867	1.06865e-96	7.38986e-95
ENSG00000147174	GCNA	germ cell nuclear acidic peptidase [Source:HGNC Symbol;Acc:HGNC:15805]	protein_coding,protein_coding_CDS_not_defined	191.384	2.0464	0.188382	10.863	1.72898e-27	3.17777e-26
ENSG00000147202	DIAPH2	diaphanous related formin 2 [Source:HGNC Symbol;Acc:HGNC:2877]	protein_coding	627.336	-2.44896	0.106274	-23.0438	1.69796e-117	1.51306e-115
ENSG00000147257	GPC3	glypican 3 [Source:HGNC Symbol;Acc:HGNC:4451]	nonsense_mediated_decay,protein_coding,protein_coding_CDS_not_defined	93.7214	-1.89435	0.314071	-6.0316	1.62341e-09	1.19767e-08
ENSG00000147408	CSGALNACT1	chondroitin sulfate N-acetylgalactosaminyltransferase 1 [Source:HGNC Symbol;Acc:HGNC:24290]	nonsense_mediated_decay,protein_coding,protein_coding_CDS_not_defined	184.227	-2.60189	0.196032	-13.2728	3.33076e-40	8.96958e-39
ENSG00000147485	PXDNL	peroxidasin like [Source:HGNC Symbol;Acc:HGNC:26359]	nonsense_mediated_decay,protein_coding,retained_intron	15.4308	-2.76098	0.65365	-4.22395	2.4006e-05	0.000114827
ENSG00000147724	FAM135B	family with sequence similarity 135 member B [Source:HGNC Symbol;Acc:HGNC:28029]	nonsense_mediated_decay,protein_coding,protein_coding_CDS_not_defined,retained_intron	34.9798	-1.76625	0.399447	-4.42174	9.79081e-06	4.90986e-05
ENSG00000147862	NFIB	nuclear factor I B [Source:HGNC Symbol;Acc:HGNC:7785]	protein_coding,protein_coding_CDS_not_defined	2638.67	-1.7249	0.0653715	-26.3861	1.97651e-153	2.51717e-151
ENSG00000147905	ZCCHC7	zinc finger CCHC-type containing 7 [Source:HGNC Symbol;Acc:HGNC:26209]	protein_coding,protein_coding_CDS_not_defined	753.794	-2.5619	0.0951752	-26.9178	1.35976e-159	1.81489e-157
ENSG00000148123	PLPPR1	phospholipid phosphatase related 1 [Source:HGNC Symbol;Acc:HGNC:25993]	protein_coding,protein_coding_CDS_not_defined	24.053	-3.47167	0.578908	-5.99694	2.01074e-09	1.47135e-08
ENSG00000148200	NR6A1	nuclear receptor subfamily 6 group A member 1 [Source:HGNC Symbol;Acc:HGNC:7985]	protein_coding	287.226	-1.98108	0.152604	-12.9818	1.55224e-38	4.00037e-37
ENSG00000148344	PTGES	prostaglandin E synthase [Source:HGNC Symbol;Acc:HGNC:9599]	protein_coding,protein_coding_CDS_not_defined	44.8058	2.21148	0.362512	6.10043	1.05782e-09	7.92847e-09
ENSG00000148468	FAM171A1	family with sequence similarity 171 member A1 [Source:HGNC Symbol;Acc:HGNC:23522]	protein_coding,protein_coding_CDS_not_defined	5469.26	-1.59618	0.0416614	-38.3132	0	0
ENSG00000148483	TMEM236	transmembrane protein 236 [Source:HGNC Symbol;Acc:HGNC:23473]	protein_coding	44.6146	1.77169	0.372908	4.75101	2.02408e-06	1.10219e-05
ENSG00000148484	RSU1	Ras suppressor protein 1 [Source:HGNC Symbol;Acc:HGNC:10464]	protein_coding,protein_coding_CDS_not_defined	1799.7	-3.20582	0.0690321	-46.4395	0	0
ENSG00000148584	A1CF	APOBEC1 complementation factor [Source:HGNC Symbol;Acc:HGNC:24086]	protein_coding,protein_coding_CDS_not_defined	16.0096	2.33106	0.609948	3.82174	0.000132515	0.000568547
ENSG00000148655	LRMDA	leucine rich melanocyte differentiation associated [Source:HGNC Symbol;Acc:HGNC:23405]	protein_coding,protein_coding_CDS_not_defined	126.628	-3.50588	0.261351	-13.4145	4.97557e-41	1.37131e-39
ENSG00000148700	ADD3	adducin 3 [Source:HGNC Symbol;Acc:HGNC:245]	protein_coding,protein_coding_CDS_not_defined	8362.21	-1.55206	0.0490785	-31.6242	1.71902e-219	4.07302e-217
ENSG00000148735	PLEKHS1	pleckstrin homology domain containing S1 [Source:HGNC Symbol;Acc:HGNC:26285]	protein_coding,protein_coding_CDS_not_defined,retained_intron	12.927	-1.96169	0.655228	-2.9939	0.00275434	0.00933106
ENSG00000148848	ADAM12	ADAM metallopeptidase domain 12 [Source:HGNC Symbol;Acc:HGNC:190]	protein_coding,protein_coding_CDS_not_defined	1536.73	-2.14929	0.0755649	-28.4429	5.95881e-178	9.53566e-176
ENSG00000149090	PAMR1	peptidase domain containing associated with muscle regeneration 1 [Source:HGNC Symbol;Acc:HGNC:24554]	protein_coding,protein_coding_CDS_not_defined,retained_intron	33.2828	-1.92687	0.417251	-4.61802	3.87423e-06	2.03744e-05
ENSG00000149179	CSTPP1	centriolar satellite-associated tubulin polyglutamylase complex regulator 1 [Source:HGNC Symbol;Acc:HGNC:28720]	nonsense_mediated_decay,protein_coding,protein_coding_CDS_not_defined,retained_intron,TEC	673.635	-2.97317	0.110655	-26.8687	5.09716e-159	6.77368e-157
ENSG00000149256	TENM4	teneurin transmembrane protein 4 [Source:HGNC Symbol;Acc:HGNC:29945]	protein_coding,protein_coding_CDS_not_defined,retained_intron	332.522	-1.98013	0.147864	-13.3916	6.77243e-41	1.8565e-39
ENSG00000149294	NCAM1	neural cell adhesion molecule 1 [Source:HGNC Symbol;Acc:HGNC:7656]	nonsense_mediated_decay,protein_coding,protein_coding_CDS_not_defined,retained_intron	3794.99	-2.01776	0.0610293	-33.0622	1.039e-239	2.9135e-237
ENSG00000149403	GRIK4	glutamate ionotropic receptor kainate type subunit 4 [Source:HGNC Symbol;Acc:HGNC:4582]	protein_coding,protein_coding_CDS_not_defined,retained_intron	26.1825	-3.6103	0.567871	-6.3576	2.04926e-10	1.61682e-09
ENSG00000149418	ST14	ST14 transmembrane serine protease matriptase [Source:HGNC Symbol;Acc:HGNC:11344]	protein_coding,retained_intron	35.1017	2.05442	0.462389	4.44306	8.86883e-06	4.46804e-05
ENSG00000149488	TMC2	transmembrane channel like 2 [Source:HGNC Symbol;Acc:HGNC:16527]	nonsense_mediated_decay,protein_coding,retained_intron	3.93162	4.40373	1.5728	2.79994	0.00511126	0.0162973
ENSG00000149571	KIRREL3	kirre like nephrin family adhesion molecule 3 [Source:HGNC Symbol;Acc:HGNC:23204]	protein_coding,protein_coding_CDS_not_defined,retained_intron	475.822	-3.03684	0.141672	-21.4357	6.20903e-102	4.62876e-100
ENSG00000150471	ADGRL3	adhesion G protein-coupled receptor L3 [Source:HGNC Symbol;Acc:HGNC:20974]	protein_coding,protein_coding_CDS_not_defined,retained_intron	788.068	-2.86422	0.0977897	-29.2896	1.409e-188	2.47507e-186
ENSG00000150625	GPM6A	glycoprotein M6A [Source:HGNC Symbol;Acc:HGNC:4460]	protein_coding,protein_coding_CDS_not_defined,retained_intron	32.4988	-4.98741	0.686595	-7.26398	3.75861e-13	3.56112e-12
ENSG00000150636	CCDC102B	coiled-coil domain containing 102B [Source:HGNC Symbol;Acc:HGNC:26295]	protein_coding,protein_coding_CDS_not_defined,retained_intron	70.513	-1.98168	0.293423	-6.75367	1.44153e-11	1.22187e-10
ENSG00000150760	DOCK1	dedicator of cytokinesis 1 [Source:HGNC Symbol;Acc:HGNC:2987]	protein_coding,protein_coding_CDS_not_defined,retained_intron	2614.59	-1.99339	0.0615762	-32.3727	6.64481e-230	1.6785e-227
ENSG00000150893	FREM2	FRAS1 related extracellular matrix 2 [Source:HGNC Symbol;Acc:HGNC:25396]	protein_coding,protein_coding_CDS_not_defined	381.031	-1.53595	0.141369	-10.8648	1.69573e-27	3.12228e-26
ENSG00000151067	CACNA1C	calcium voltage-gated channel subunit alpha1 C [Source:HGNC Symbol;Acc:HGNC:1390]	nonsense_mediated_decay,protein_coding,protein_coding_CDS_not_defined,retained_intron	296.249	-1.98975	0.168356	-11.8187	3.12464e-32	6.67397e-31
ENSG00000151090	THRB	thyroid hormone receptor beta [Source:HGNC Symbol;Acc:HGNC:11799]	nonsense_mediated_decay,protein_coding,protein_coding_CDS_not_defined	289.938	-2.222	0.150008	-14.8125	1.21615e-49	4.03601e-48
ENSG00000151229	SLC2A13	solute carrier family 2 member 13 [Source:HGNC Symbol;Acc:HGNC:15956]	protein_coding,retained_intron	288.983	-2.07579	0.152303	-13.6293	2.67969e-42	7.62613e-41
ENSG00000151320	AKAP6	A-kinase anchoring protein 6 [Source:HGNC Symbol;Acc:HGNC:376]	protein_coding,protein_coding_CDS_not_defined,retained_intron	79.8683	-1.83324	0.263437	-6.95895	3.42818e-12	3.03629e-11
ENSG00000151338	MIPOL1	mirror-image polydactyly 1 [Source:HGNC Symbol;Acc:HGNC:21460]	nonsense_mediated_decay,protein_coding,protein_coding_CDS_not_defined,retained_intron,TEC	317.881	-1.58777	0.143463	-11.0674	1.80489e-28	3.45439e-27
ENSG00000151422	FER	FER tyrosine kinase [Source:HGNC Symbol;Acc:HGNC:3655]	nonsense_mediated_decay,protein_coding,protein_coding_CDS_not_defined	1832.65	-1.77178	0.0701306	-25.264	7.95595e-141	9.24615e-139
ENSG00000151468	CCDC3	coiled-coil domain containing 3 [Source:HGNC Symbol;Acc:HGNC:23813]	protein_coding	1168.74	-3.19526	0.0832807	-38.3674	0	0
ENSG00000151532	VTI1A	vesicle transport through interaction with t-SNAREs 1A [Source:HGNC Symbol;Acc:HGNC:17792]	protein_coding,protein_coding_CDS_not_defined	1023.67	-1.78187	0.0770146	-23.1368	1.97498e-118	1.78068e-116
ENSG00000151631	AKR1C6P	aldo-keto reductase family 1 member C6, pseudogene [Source:HGNC Symbol;Acc:HGNC:44680]	unprocessed_pseudogene	4.29943	5.55405	1.53658	3.61455	0.000300866	0.00121704
ENSG00000151789	ZNF385D	zinc finger protein 385D [Source:HGNC Symbol;Acc:HGNC:26191]	nonsense_mediated_decay,protein_coding,protein_coding_CDS_not_defined	46.0797	-1.96172	0.354096	-5.54009	3.02321e-08	1.99191e-07
ENSG00000152086	TUBA3E	tubulin alpha 3e [Source:HGNC Symbol;Acc:HGNC:20765]	protein_coding	65.804	-3.2848	0.341496	-9.61887	6.65607e-22	9.89027e-21
ENSG00000152092	ASTN1	astrotactin 1 [Source:HGNC Symbol;Acc:HGNC:773]	protein_coding,protein_coding_CDS_not_defined	800.503	-2.2466	0.0935968	-24.0029	2.59167e-127	2.5553e-125
ENSG00000152208	GRID2	glutamate ionotropic receptor delta type subunit 2 [Source:HGNC Symbol;Acc:HGNC:4576]	nonsense_mediated_decay,protein_coding,protein_coding_CDS_not_defined	709.452	-5.91501	0.189644	-31.19	1.4557e-213	3.24769e-211
ENSG00000152284	TCF7L1	transcription factor 7 like 1 [Source:HGNC Symbol;Acc:HGNC:11640]	protein_coding,protein_coding_CDS_not_defined,retained_intron	609.805	-1.63619	0.0956171	-17.1119	1.21058e-65	5.39378e-64
ENSG00000152292	SH2D6	SH2 domain containing 6 [Source:HGNC Symbol;Acc:HGNC:30439]	nonsense_mediated_decay,protein_coding,retained_intron	13.6989	2.17785	0.777274	2.80191	0.00508017	0.0162138
ENSG00000152348	ATG10	autophagy related 10 [Source:HGNC Symbol;Acc:HGNC:20315]	nonsense_mediated_decay,protein_coding,protein_coding_CDS_not_defined	413.456	-1.81962	0.121145	-15.0201	5.4206e-51	1.85118e-49
ENSG00000152402	GUCY1A2	guanylate cyclase 1 soluble subunit alpha 2 [Source:HGNC Symbol;Acc:HGNC:4684]	protein_coding	1535.41	-1.83251	0.0796726	-23.0005	4.60673e-117	4.05777e-115
ENSG00000152422	XRCC4	X-ray repair cross complementing 4 [Source:HGNC Symbol;Acc:HGNC:12831]	protein_coding,protein_coding_CDS_not_defined	709.091	-1.51645	0.0901984	-16.8124	1.97873e-63	8.5183e-62
ENSG00000152767	FARP1	FERM, ARH/RhoGEF and pleckstrin domain protein 1 [Source:HGNC Symbol;Acc:HGNC:3591]	protein_coding,protein_coding_CDS_not_defined,retained_intron	1295.46	-2.54744	0.0738711	-34.4849	1.34872e-260	4.43264e-258
ENSG00000152894	PTPRK	protein tyrosine phosphatase receptor type K [Source:HGNC Symbol;Acc:HGNC:9674]	nonsense_mediated_decay,protein_coding,protein_coding_CDS_not_defined,retained_intron	3369.63	-2.0104	0.0508778	-39.5142	0	0
ENSG00000152910	CNTNAP4	contactin associated protein family member 4 [Source:HGNC Symbol;Acc:HGNC:18747]	protein_coding,protein_coding_CDS_not_defined,retained_intron	11.764	-4.50681	1.01606	-4.43557	9.18303e-06	4.61492e-05
ENSG00000152932	RAB3C	RAB3C, member RAS oncogene family [Source:HGNC Symbol;Acc:HGNC:30269]	protein_coding,protein_coding_CDS_not_defined	5.32332	-3.91185	1.35085	-2.89585	0.00378135	0.0124303
ENSG00000152953	STK32B	serine/threonine kinase 32B [Source:HGNC Symbol;Acc:HGNC:14217]	nonsense_mediated_decay,protein_coding,protein_coding_CDS_not_defined,retained_intron	195.651	-2.24153	0.202691	-11.0588	1.98659e-28	3.79739e-27
ENSG00000153015	CWC27	CWC27 spliceosome associated cyclophilin [Source:HGNC Symbol;Acc:HGNC:10664]	nonsense_mediated_decay,protein_coding,protein_coding_CDS_not_defined,retained_intron	1592.54	-1.5257	0.0616004	-24.7677	1.99906e-135	2.19001e-133
ENSG00000153064	BANK1	B cell scaffold protein with ankyrin repeats 1 [Source:HGNC Symbol;Acc:HGNC:18233]	protein_coding,protein_coding_CDS_not_defined,retained_intron	88.8581	-1.50266	0.248201	-6.05423	1.41088e-09	1.04643e-08
ENSG00000153294	ADGRF4	adhesion G protein-coupled receptor F4 [Source:HGNC Symbol;Acc:HGNC:19011]	protein_coding	17.6752	1.71076	0.588375	2.9076	0.00364211	0.0120191
ENSG00000153404	PLEKHG4B	pleckstrin homology and RhoGEF domain containing G4B [Source:HGNC Symbol;Acc:HGNC:29399]	protein_coding,retained_intron	290.033	-1.59465	0.144714	-11.0193	3.08358e-28	5.85038e-27
ENSG00000153531	ADPRHL1	ADP-ribosylhydrolase like 1 [Source:HGNC Symbol;Acc:HGNC:21303]	protein_coding	610.165	1.9612	0.104518	18.7642	1.48206e-78	8.04605e-77
ENSG00000153774	CFDP1	craniofacial development protein 1 [Source:HGNC Symbol;Acc:HGNC:1873]	nonsense_mediated_decay,protein_coding,protein_coding_CDS_not_defined,retained_intron	1152.77	-2.79251	0.0797338	-35.0229	1.00952e-268	3.54666e-266
ENSG00000153814	JAZF1	JAZF zinc finger 1 [Source:HGNC Symbol;Acc:HGNC:28917]	nonsense_mediated_decay,protein_coding,protein_coding_CDS_not_defined	526.395	-4.16609	0.148423	-28.0691	2.33533e-173	3.5869e-171
ENSG00000153823	PID1	phosphotyrosine interaction domain containing 1 [Source:HGNC Symbol;Acc:HGNC:26084]	nonsense_mediated_decay,protein_coding,protein_coding_CDS_not_defined	836.822	-2.65965	0.0934327	-28.466	3.09095e-178	4.97236e-176
ENSG00000153832	FBXO36	F-box protein 36 [Source:HGNC Symbol;Acc:HGNC:27020]	protein_coding,retained_intron	123.915	-1.73773	0.210093	-8.27126	1.32549e-16	1.52824e-15
ENSG00000153936	HS2ST1	heparan sulfate 2-O-sulfotransferase 1 [Source:HGNC Symbol;Acc:HGNC:5193]	nonsense_mediated_decay,protein_coding	2254.09	-2.25366	0.0635832	-35.4443	3.5551e-275	1.29359e-272
ENSG00000153956	CACNA2D1	calcium voltage-gated channel auxiliary subunit alpha2delta 1 [Source:HGNC Symbol;Acc:HGNC:1399]	protein_coding,protein_coding_CDS_not_defined,retained_intron	1051.63	-4.29225	0.111518	-38.4895	0	0
ENSG00000154080	CHST9	carbohydrate sulfotransferase 9 [Source:HGNC Symbol;Acc:HGNC:19898]	protein_coding	8.79726	-3.26227	0.922563	-3.5361	0.000406085	0.00160777
ENSG00000154099	DNAAF1	dynein axonemal assembly factor 1 [Source:HGNC Symbol;Acc:HGNC:30539]	nonsense_mediated_decay,protein_coding,protein_coding_CDS_not_defined,retained_intron,TEC	31.2776	1.67651	0.437527	3.83179	0.000127215	0.00054765
ENSG00000154118	JPH3	junctophilin 3 [Source:HGNC Symbol;Acc:HGNC:14203]	protein_coding,protein_coding_CDS_not_defined	3353.13	-2.18517	0.0601723	-36.3153	9.29146e-289	3.94436e-286
ENSG00000154122	ANKH	ANKH inorganic pyrophosphate transport regulator [Source:HGNC Symbol;Acc:HGNC:15492]	nonsense_mediated_decay,protein_coding,protein_coding_CDS_not_defined,retained_intron	2069.1	-1.74521	0.0645582	-27.0331	6.03743e-161	8.12925e-159
ENSG00000154127	UBASH3B	ubiquitin associated and SH3 domain containing B [Source:HGNC Symbol;Acc:HGNC:29884]	protein_coding,protein_coding_CDS_not_defined,retained_intron	1647.41	-2.17042	0.0691003	-31.4097	1.49058e-216	3.42554e-214
ENSG00000154162	CDH12	cadherin 12 [Source:HGNC Symbol;Acc:HGNC:1751]	protein_coding,protein_coding_CDS_not_defined,retained_intron	297.909	-4.6724	0.210766	-22.1686	6.89506e-109	5.63496e-107
ENSG00000154188	ANGPT1	angiopoietin 1 [Source:HGNC Symbol;Acc:HGNC:484]	protein_coding,protein_coding_CDS_not_defined,retained_intron	60.9888	-3.16956	0.353285	-8.97167	2.9204e-19	3.80324e-18
ENSG00000154217	PITPNC1	phosphatidylinositol transfer protein cytoplasmic 1 [Source:HGNC Symbol;Acc:HGNC:21045]	protein_coding,retained_intron	116.946	-1.98807	0.232955	-8.53415	1.41193e-17	1.70644e-16
ENSG00000154229	PRKCA	protein kinase C alpha [Source:HGNC Symbol;Acc:HGNC:9393]	nonsense_mediated_decay,protein_coding,protein_coding_CDS_not_defined,retained_intron	6111.6	-3.97138	0.123636	-32.1216	2.20473e-226	5.39102e-224
ENSG00000154263	ABCA10	ATP binding cassette subfamily A member 10 [Source:HGNC Symbol;Acc:HGNC:30]	nonsense_mediated_decay,protein_coding,protein_coding_CDS_not_defined,retained_intron	12.5394	1.78927	0.662633	2.70024	0.00692888	0.0214137
ENSG00000154319	FAM167A	family with sequence similarity 167 member A [Source:HGNC Symbol;Acc:HGNC:15549]	protein_coding,protein_coding_CDS_not_defined	654.227	2.84849	0.109373	26.0437	1.58378e-149	1.92862e-147
ENSG00000154330	PGM5	phosphoglucomutase 5 [Source:HGNC Symbol;Acc:HGNC:8908]	protein_coding,protein_coding_CDS_not_defined,retained_intron	356.206	-1.64663	0.127935	-12.8708	6.56827e-38	1.66329e-36
ENSG00000154451	GBP5	guanylate binding protein 5 [Source:HGNC Symbol;Acc:HGNC:19895]	protein_coding,protein_coding_CDS_not_defined,retained_intron	12.4087	2.24861	0.684199	3.28648	0.00101448	0.0037354
ENSG00000154654	NCAM2	neural cell adhesion molecule 2 [Source:HGNC Symbol;Acc:HGNC:7657]	protein_coding,protein_coding_CDS_not_defined	380.176	-5.17426	0.215524	-24.0079	2.30243e-127	2.27747e-125
ENSG00000154655	L3MBTL4	L3MBTL histone methyl-lysine binding protein 4 [Source:HGNC Symbol;Acc:HGNC:26677]	protein_coding,protein_coding_CDS_not_defined	212.213	-2.06382	0.170659	-12.0933	1.14644e-33	2.58415e-32
ENSG00000154678	PDE1C	phosphodiesterase 1C [Source:HGNC Symbol;Acc:HGNC:8776]	protein_coding,protein_coding_CDS_not_defined,retained_intron	980.723	-2.55724	0.0850152	-30.0797	8.92047e-199	1.79378e-196
ENSG00000154864	PIEZO2	piezo type mechanosensitive ion channel component 2 [Source:HGNC Symbol;Acc:HGNC:26270]	nonsense_mediated_decay,protein_coding,protein_coding_CDS_not_defined,retained_intron	1312.39	-3.12147	0.0943584	-33.081	5.57419e-240	1.60731e-237
ENSG00000154928	EPHB1	EPH receptor B1 [Source:HGNC Symbol;Acc:HGNC:3392]	nonsense_mediated_decay,protein_coding,protein_coding_CDS_not_defined,retained_intron	142.005	-2.52734	0.210935	-11.9816	4.43651e-33	9.80492e-32
ENSG00000155011	DKK2	dickkopf WNT signaling pathway inhibitor 2 [Source:HGNC Symbol;Acc:HGNC:2892]	protein_coding,retained_intron	8.44051	-3.20083	0.969821	-3.30043	0.000965353	0.00356697
ENSG00000155093	PTPRN2	protein tyrosine phosphatase receptor type N2 [Source:HGNC Symbol;Acc:HGNC:9677]	protein_coding	475.422	-1.57966	0.112113	-14.0899	4.38076e-45	1.31789e-43
ENSG00000155761	SPAG17	sperm associated antigen 17 [Source:HGNC Symbol;Acc:HGNC:26620]	protein_coding,protein_coding_CDS_not_defined	254.4	2.18943	0.157313	13.9177	4.94397e-44	1.4558e-42
ENSG00000155792	DEPTOR	DEP domain containing MTOR interacting protein [Source:HGNC Symbol;Acc:HGNC:22953]	protein_coding,protein_coding_CDS_not_defined	163.599	-1.99399	0.198681	-10.0361	1.05727e-23	1.69902e-22
ENSG00000155918	RAET1L	retinoic acid early transcript 1L [Source:HGNC Symbol;Acc:HGNC:16798]	protein_coding	65.1438	1.90012	0.304498	6.24017	4.37099e-10	3.36099e-09
ENSG00000155966	AFF2	AF4/FMR2 family member 2 [Source:HGNC Symbol;Acc:HGNC:3776]	protein_coding,protein_coding_CDS_not_defined	243.053	-3.55525	0.380385	-9.34645	9.06391e-21	1.27609e-19
ENSG00000155974	GRIP1	glutamate receptor interacting protein 1 [Source:HGNC Symbol;Acc:HGNC:18708]	nonsense_mediated_decay,protein_coding,protein_coding_CDS_not_defined,retained_intron	489.069	-3.64509	0.134344	-27.1325	4.07117e-162	5.55514e-160
ENSG00000156026	MCU	mitochondrial calcium uniporter [Source:HGNC Symbol;Acc:HGNC:23526]	nonsense_mediated_decay,protein_coding,protein_coding_CDS_not_defined,retained_intron	1812.84	-2.41784	0.0642136	-37.6531	0	0
ENSG00000156110	ADK	adenosine kinase [Source:HGNC Symbol;Acc:HGNC:257]	nonsense_mediated_decay,protein_coding,protein_coding_CDS_not_defined	1511.42	-1.84367	0.0650806	-28.3291	1.51595e-176	2.3884e-174
ENSG00000156150	ALX3	ALX homeobox 3 [Source:HGNC Symbol;Acc:HGNC:449]	protein_coding	2.96131	3.97259	1.67094	2.37746	0.0174324	0.048324
ENSG00000156298	TSPAN7	tetraspanin 7 [Source:HGNC Symbol;Acc:HGNC:11854]	nonsense_mediated_decay,protein_coding,protein_coding_CDS_not_defined,retained_intron	120.95	-4.03917	0.291086	-13.8762	8.83012e-44	2.58766e-42
ENSG00000156395	SORCS3	sortilin related VPS10 domain containing receptor 3 [Source:HGNC Symbol;Acc:HGNC:16699]	protein_coding	28.4336	-1.78343	0.478475	-3.72734	0.000193515	0.000807039
ENSG00000156427	FGF18	fibroblast growth factor 18 [Source:HGNC Symbol;Acc:HGNC:3674]	protein_coding	72.0063	1.85427	0.279553	6.63301	3.2892e-11	2.7282e-10
ENSG00000156453	PCDH1	protocadherin 1 [Source:HGNC Symbol;Acc:HGNC:8655]	nonsense_mediated_decay,protein_coding,protein_coding_CDS_not_defined	375.061	2.14972	0.124641	17.2473	1.17291e-66	5.35075e-65
ENSG00000156475	PPP2R2B	protein phosphatase 2 regulatory subunit Bbeta [Source:HGNC Symbol;Acc:HGNC:9305]	nonsense_mediated_decay,protein_coding,protein_coding_CDS_not_defined	118.463	-1.93239	0.22231	-8.69232	3.55105e-18	4.42109e-17
ENSG00000156486	KCNS2	potassium voltage-gated channel modifier subfamily S member 2 [Source:HGNC Symbol;Acc:HGNC:6301]	protein_coding	7.94986	-2.33569	0.909027	-2.56943	0.0101865	0.0300849
ENSG00000156687	UNC5D	unc-5 netrin receptor D [Source:HGNC Symbol;Acc:HGNC:18634]	protein_coding,retained_intron	67.6662	-2.91165	0.334608	-8.70169	3.26977e-18	4.07422e-17
ENSG00000156711	MAPK13	mitogen-activated protein kinase 13 [Source:HGNC Symbol;Acc:HGNC:6875]	protein_coding,protein_coding_CDS_not_defined	38.0957	-1.64655	0.40426	-4.073	4.64105e-05	0.00021277
ENSG00000156831	NSMCE2	NSE2 (MMS21) homolog, SMC5-SMC6 complex SUMO ligase [Source:HGNC Symbol;Acc:HGNC:26513]	nonsense_mediated_decay,protein_coding,protein_coding_CDS_not_defined,retained_intron	1787.73	-1.78299	0.0592775	-30.0786	9.22112e-199	1.84211e-196
ENSG00000156966	B3GNT7	UDP-GlcNAc:betaGal beta-1,3-N-acetylglucosaminyltransferase 7 [Source:HGNC Symbol;Acc:HGNC:18811]	protein_coding,protein_coding_CDS_not_defined	7.45544	-2.69256	0.984946	-2.73371	0.0062625	0.0195599
ENSG00000156973	PDE6D	phosphodiesterase 6D [Source:HGNC Symbol;Acc:HGNC:8788]	protein_coding,protein_coding_CDS_not_defined,retained_intron	318.508	-1.52762	0.132127	-11.5618	6.43729e-31	1.31962e-29
ENSG00000157554	ERG	ETS transcription factor ERG [Source:HGNC Symbol;Acc:HGNC:3446]	protein_coding,protein_coding_CDS_not_defined,retained_intron	231.915	-4.18668	0.216242	-19.3611	1.64419e-83	9.51792e-82
ENSG00000157570	TSPAN18	tetraspanin 18 [Source:HGNC Symbol;Acc:HGNC:20660]	protein_coding,retained_intron	6.61363	-3.16554	1.12427	-2.81563	0.0048681	0.0156083
ENSG00000157766	ACAN	aggrecan [Source:HGNC Symbol;Acc:HGNC:319]	protein_coding,retained_intron	775.086	-1.50726	0.089983	-16.7505	5.61403e-63	2.40326e-61
ENSG00000157851	DPYSL5	dihydropyrimidinase like 5 [Source:HGNC Symbol;Acc:HGNC:20637]	protein_coding,retained_intron	266.895	-3.48826	0.179814	-19.3993	7.8264e-84	4.58264e-82
ENSG00000157985	AGAP1	ArfGAP with GTPase domain, ankyrin repeat and PH domain 1 [Source:HGNC Symbol;Acc:HGNC:16922]	protein_coding,protein_coding_CDS_not_defined,retained_intron	2796.56	-2.1536	0.0606427	-35.5129	3.10326e-276	1.15672e-273
ENSG00000158019	BABAM2	BRISC and BRCA1 A complex member 2 [Source:HGNC Symbol;Acc:HGNC:1106]	non_stop_decay,protein_coding,protein_coding_CDS_not_defined,retained_intron	1347.18	-2.45761	0.0755074	-32.5479	2.24536e-232	5.86575e-230
ENSG00000158055	GRHL3	grainyhead like transcription factor 3 [Source:HGNC Symbol;Acc:HGNC:25839]	protein_coding,protein_coding_CDS_not_defined,retained_intron	60.9289	1.54024	0.290942	5.29395	1.19701e-07	7.43478e-07
ENSG00000158104	HPD	4-hydroxyphenylpyruvate dioxygenase [Source:HGNC Symbol;Acc:HGNC:5147]	protein_coding,retained_intron	13.3909	1.60696	0.674438	2.38266	0.0171881	0.0477291
ENSG00000158169	FANCC	FA complementation group C [Source:HGNC Symbol;Acc:HGNC:3584]	nonsense_mediated_decay,protein_coding,protein_coding_CDS_not_defined,retained_intron	1310.5	-1.765	0.0717488	-24.5998	1.27041e-133	1.35769e-131
ENSG00000158258	CLSTN2	calsyntenin 2 [Source:HGNC Symbol;Acc:HGNC:17448]	protein_coding,retained_intron	425.86	-1.79253	0.135821	-13.1977	9.04562e-40	2.40626e-38
ENSG00000158270	COLEC12	collectin subfamily member 12 [Source:HGNC Symbol;Acc:HGNC:16016]	protein_coding,protein_coding_CDS_not_defined,retained_intron	435.678	-4.55593	0.31406	-14.5065	1.10132e-47	3.50644e-46
ENSG00000158467	AHCYL2	adenosylhomocysteinase like 2 [Source:HGNC Symbol;Acc:HGNC:22204]	protein_coding,protein_coding_CDS_not_defined,retained_intron	501.804	-2.98038	0.131367	-22.6875	5.95328e-114	5.14017e-112
ENSG00000158764	ITLN2	intelectin 2 [Source:HGNC Symbol;Acc:HGNC:20599]	protein_coding,protein_coding_CDS_not_defined	4.10756	3.51499	1.44767	2.42803	0.015181	0.0428842
ENSG00000158769	F11R	F11 receptor [Source:HGNC Symbol;Acc:HGNC:14685]	protein_coding,protein_coding_CDS_not_defined,retained_intron	112.869	-1.52672	0.24508	-6.22948	4.6798e-10	3.59121e-09
ENSG00000159166	LAD1	ladinin 1 [Source:HGNC Symbol;Acc:HGNC:6472]	protein_coding,protein_coding_CDS_not_defined	28.0315	2.39245	0.504628	4.74102	2.12647e-06	1.1565e-05
ENSG00000159173	TNNI1	troponin I1, slow skeletal type [Source:HGNC Symbol;Acc:HGNC:11945]	protein_coding	10.1114	-2.03112	0.795224	-2.55415	0.0106447	0.0312871
ENSG00000159224	GIP	gastric inhibitory polypeptide [Source:HGNC Symbol;Acc:HGNC:4270]	protein_coding	8.89081	2.30864	0.87305	2.64434	0.00818512	0.024807
ENSG00000159915	ZNF233	zinc finger protein 233 [Source:HGNC Symbol;Acc:HGNC:30946]	protein_coding	10.0795	1.87904	0.726121	2.58777	0.00965985	0.0287463
ENSG00000159958	TNFRSF13C	TNF receptor superfamily member 13C [Source:HGNC Symbol;Acc:HGNC:17755]	protein_coding	180.572	-2.34998	0.192483	-12.2088	2.79096e-34	6.40432e-33
ENSG00000160007	ARHGAP35	Rho GTPase activating protein 35 [Source:HGNC Symbol;Acc:HGNC:4591]	protein_coding,protein_coding_CDS_not_defined,retained_intron	4151.91	-2.11239	0.0512422	-41.2236	0	0
ENSG00000160013	PTGIR	prostaglandin I2 receptor [Source:HGNC Symbol;Acc:HGNC:9602]	protein_coding,retained_intron	18.8746	1.98001	0.541404	3.65719	0.000254997	0.0010442
ENSG00000160188	RSPH1	radial spoke head component 1 [Source:HGNC Symbol;Acc:HGNC:12371]	protein_coding,retained_intron	25.8128	1.94817	0.494135	3.94258	8.061e-05	0.000357545
ENSG00000160293	VAV2	vav guanine nucleotide exchange factor 2 [Source:HGNC Symbol;Acc:HGNC:12658]	protein_coding,protein_coding_CDS_not_defined	1604.97	-2.50779	0.0728171	-34.4396	6.45494e-260	2.09889e-257
ENSG00000160439	RDH13	retinol dehydrogenase 13 [Source:HGNC Symbol;Acc:HGNC:19978]	nonsense_mediated_decay,protein_coding,protein_coding_CDS_not_defined	214.705	1.54054	0.167129	9.21766	3.03661e-20	4.14718e-19
ENSG00000160472	TMEM190	transmembrane protein 190 [Source:HGNC Symbol;Acc:HGNC:29632]	protein_coding	9.10481	2.16793	0.822436	2.63599	0.0083892	0.0253626
ENSG00000160712	IL6R	interleukin 6 receptor [Source:HGNC Symbol;Acc:HGNC:6019]	protein_coding,protein_coding_CDS_not_defined,retained_intron	444.602	1.88559	0.119417	15.79	3.64764e-56	1.36966e-54
ENSG00000160883	HK3	hexokinase 3 [Source:HGNC Symbol;Acc:HGNC:4925]	nonsense_mediated_decay,protein_coding,retained_intron	14.2135	2.48713	0.705916	3.52327	0.00042625	0.00168303
ENSG00000161180	CCDC116	coiled-coil domain containing 116 [Source:HGNC Symbol;Acc:HGNC:26688]	protein_coding	36.299	-1.83832	0.385748	-4.76561	1.88287e-06	1.02768e-05
ENSG00000161298	ZNF382	zinc finger protein 382 [Source:HGNC Symbol;Acc:HGNC:17409]	protein_coding,protein_coding_CDS_not_defined,retained_intron	18.6994	1.60042	0.536726	2.98182	0.00286536	0.00966983
ENSG00000162040	HS3ST6	heparan sulfate-glucosamine 3-sulfotransferase 6 [Source:HGNC Symbol;Acc:HGNC:14178]	protein_coding	26.3234	2.04449	0.469223	4.35719	1.31745e-05	6.5095e-05
ENSG00000162078	ZG16B	zymogen granule protein 16B [Source:HGNC Symbol;Acc:HGNC:30456]	protein_coding,retained_intron	36.8199	2.01628	0.393031	5.13009	2.89608e-07	1.72048e-06
ENSG00000162105	SHANK2	SH3 and multiple ankyrin repeat domains 2 [Source:HGNC Symbol;Acc:HGNC:14295]	protein_coding,protein_coding_CDS_not_defined,retained_intron	117.652	-1.83308	0.233129	-7.86294	3.75218e-15	3.98214e-14
ENSG00000162618	ADGRL4	adhesion G protein-coupled receptor L4 [Source:HGNC Symbol;Acc:HGNC:20822]	nonsense_mediated_decay,protein_coding,protein_coding_CDS_not_defined,retained_intron	139.695	-2.4747	0.231227	-10.7025	9.90665e-27	1.77489e-25
ENSG00000162631	NTNG1	netrin G1 [Source:HGNC Symbol;Acc:HGNC:23319]	protein_coding,protein_coding_CDS_not_defined,retained_intron	424.752	-2.22464	0.123278	-18.0457	8.52302e-73	4.24277e-71
ENSG00000162654	GBP4	guanylate binding protein 4 [Source:HGNC Symbol;Acc:HGNC:20480]	protein_coding,protein_coding_CDS_not_defined	14.8886	2.31496	0.64812	3.57181	0.000354517	0.00141756
ENSG00000162687	KCNT2	potassium sodium-activated channel subfamily T member 2 [Source:HGNC Symbol;Acc:HGNC:18866]	nonsense_mediated_decay,protein_coding,protein_coding_CDS_not_defined	31.942	-2.44922	0.472134	-5.18756	2.13066e-07	1.28639e-06
ENSG00000162723	SLAMF9	SLAM family member 9 [Source:HGNC Symbol;Acc:HGNC:18430]	protein_coding,protein_coding_CDS_not_defined	47.9886	3.22264	0.399113	8.07451	6.77506e-16	7.50017e-15
ENSG00000162814	SPATA17	spermatogenesis associated 17 [Source:HGNC Symbol;Acc:HGNC:25184]	nonsense_mediated_decay,protein_coding,protein_coding_CDS_not_defined	10.7541	-1.7447	0.708856	-2.4613	0.0138436	0.0394637
ENSG00000162849	KIF26B	kinesin family member 26B [Source:HGNC Symbol;Acc:HGNC:25484]	protein_coding,protein_coding_CDS_not_defined,retained_intron	45.2713	-2.506	0.379049	-6.61128	3.8101e-11	3.14745e-10
ENSG00000162892	IL24	interleukin 24 [Source:HGNC Symbol;Acc:HGNC:11346]	nonsense_mediated_decay,protein_coding,protein_coding_CDS_not_defined	41.9681	1.50224	0.358113	4.19489	2.73008e-05	0.000129293
ENSG00000162946	DISC1	DISC1 scaffold protein [Source:HGNC Symbol;Acc:HGNC:2888]	nonsense_mediated_decay,protein_coding,protein_coding_CDS_not_defined,retained_intron	249.154	-1.81288	0.149569	-12.1207	8.20125e-34	1.85682e-32
ENSG00000163083	INHBB	inhibin subunit beta B [Source:HGNC Symbol;Acc:HGNC:6067]	protein_coding	7.11847	-2.37255	0.906961	-2.61593	0.0088985	0.0267568
ENSG00000163116	STPG2	sperm tail PG-rich repeat containing 2 [Source:HGNC Symbol;Acc:HGNC:28712]	protein_coding,protein_coding_CDS_not_defined	10.4347	-2.5806	0.8315	-3.10355	0.00191212	0.00669231
ENSG00000163121	NEURL3	neuralized E3 ubiquitin protein ligase 3 [Source:HGNC Symbol;Acc:HGNC:25162]	protein_coding,retained_intron	16.1917	2.05299	0.651294	3.15218	0.00162057	0.0057448
ENSG00000163207	IVL	involucrin [Source:HGNC Symbol;Acc:HGNC:6187]	protein_coding	39.9518	1.93264	0.385848	5.00882	5.47646e-07	3.16304e-06
ENSG00000163235	TGFA	transforming growth factor alpha [Source:HGNC Symbol;Acc:HGNC:11765]	protein_coding,protein_coding_CDS_not_defined	2093.68	-1.63938	0.0682025	-24.0369	1.14333e-127	1.1383e-125
ENSG00000163430	FSTL1	follistatin like 1 [Source:HGNC Symbol;Acc:HGNC:3972]	protein_coding,protein_coding_CDS_not_defined,retained_intron	17368.3	-2.98335	0.039724	-75.1019	0	0
ENSG00000163501	IHH	Indian hedgehog signaling molecule [Source:HGNC Symbol;Acc:HGNC:5956]	protein_coding	12.0862	1.71591	0.660543	2.59773	0.00938424	0.0280216
ENSG00000163520	FBLN2	fibulin 2 [Source:HGNC Symbol;Acc:HGNC:3601]	protein_coding,retained_intron	11.1202	-2.19247	0.733298	-2.98988	0.00279091	0.00944676
ENSG00000163568	AIM2	absent in melanoma 2 [Source:HGNC Symbol;Acc:HGNC:357]	protein_coding,protein_coding_CDS_not_defined	11.6063	3.70198	0.878712	4.21297	2.52038e-05	0.000120124
ENSG00000163581	SLC2A2	solute carrier family 2 member 2 [Source:HGNC Symbol;Acc:HGNC:11006]	nonsense_mediated_decay,protein_coding,retained_intron	11.0918	2.05554	0.765361	2.68571	0.0072376	0.022238
ENSG00000163590	PPM1L	protein phosphatase, Mg2+/Mn2+ dependent 1L [Source:HGNC Symbol;Acc:HGNC:16381]	protein_coding,protein_coding_CDS_not_defined	125.58	-1.54219	0.231031	-6.67523	2.4684e-11	2.06421e-10
ENSG00000163683	SMIM14	small integral membrane protein 14 [Source:HGNC Symbol;Acc:HGNC:27321]	nonsense_mediated_decay,protein_coding,protein_coding_CDS_not_defined	558.686	-1.89331	0.111287	-17.0129	6.59332e-65	2.90381e-63
ENSG00000163697	APBB2	amyloid beta precursor protein binding family B member 2 [Source:HGNC Symbol;Acc:HGNC:582]	nonsense_mediated_decay,protein_coding,protein_coding_CDS_not_defined,retained_intron	5756.45	-2.30521	0.0428161	-53.8398	0	0
ENSG00000163814	CDCP1	CUB domain containing protein 1 [Source:HGNC Symbol;Acc:HGNC:24357]	protein_coding,protein_coding_CDS_not_defined	33.4182	2.95807	0.46261	6.3943	1.61286e-10	1.28378e-09
ENSG00000163864	NMNAT3	nicotinamide nucleotide adenylyltransferase 3 [Source:HGNC Symbol;Acc:HGNC:20989]	nonsense_mediated_decay,protein_coding,protein_coding_CDS_not_defined,retained_intron	19.0965	-1.50353	0.558029	-2.69437	0.00705228	0.0217532
ENSG00000163898	LIPH	lipase H [Source:HGNC Symbol;Acc:HGNC:18483]	nonsense_mediated_decay,protein_coding	144.791	2.15534	0.222467	9.68836	3.37917e-22	5.07041e-21
ENSG00000163915	IGF2BP2-AS1	IGF2BP2 antisense RNA 1 [Source:HGNC Symbol;Acc:HGNC:32674]	lncRNA	12.7508	5.2246	1.16529	4.48353	7.34187e-06	3.73509e-05
ENSG00000163995	ABLIM2	actin binding LIM protein family member 2 [Source:HGNC Symbol;Acc:HGNC:19195]	protein_coding,protein_coding_CDS_not_defined,retained_intron	47.3871	-1.68685	0.346922	-4.86234	1.16005e-06	6.47852e-06
ENSG00000164078	MST1R	macrophage stimulating 1 receptor [Source:HGNC Symbol;Acc:HGNC:7381]	nonsense_mediated_decay,protein_coding,retained_intron	23.0605	1.51599	0.475499	3.1882	0.0014316	0.00512294
ENSG00000164089	ETNPPL	ethanolamine-phosphate phospho-lyase [Source:HGNC Symbol;Acc:HGNC:14404]	nonsense_mediated_decay,protein_coding,retained_intron	17.3408	1.91001	0.55943	3.41421	0.000639673	0.00244273
ENSG00000164176	EDIL3	EGF like repeats and discoidin domains 3 [Source:HGNC Symbol;Acc:HGNC:3173]	protein_coding,protein_coding_CDS_not_defined	27277.4	-3.54622	0.107736	-32.9158	1.30596e-237	3.59609e-235
ENSG00000164185	ZNF474	zinc finger protein 474 [Source:HGNC Symbol;Acc:HGNC:23245]	protein_coding	8.61767	-2.9536	0.930962	-3.17263	0.00151066	0.00538969
ENSG00000164197	RNF180	ring finger protein 180 [Source:HGNC Symbol;Acc:HGNC:27752]	protein_coding	205.958	-2.55822	0.179636	-14.2411	5.08961e-46	1.56032e-44
ENSG00000164283	ESM1	endothelial cell specific molecule 1 [Source:HGNC Symbol;Acc:HGNC:3466]	protein_coding,protein_coding_CDS_not_defined	544.501	3.00869	0.123329	24.3956	1.90277e-131	1.97817e-129
ENSG00000164309	CMYA5	cardiomyopathy associated 5 [Source:HGNC Symbol;Acc:HGNC:14305]	protein_coding,protein_coding_CDS_not_defined,retained_intron	100.584	-2.45196	0.254924	-9.61841	6.68564e-22	9.92938e-21
ENSG00000164330	EBF1	EBF transcription factor 1 [Source:HGNC Symbol;Acc:HGNC:3126]	protein_coding,protein_coding_CDS_not_defined,retained_intron	471.218	-2.34345	0.12942	-18.1072	2.79379e-73	1.40217e-71
ENSG00000164418	GRIK2	glutamate ionotropic receptor kainate type subunit 2 [Source:HGNC Symbol;Acc:HGNC:4580]	nonsense_mediated_decay,protein_coding,protein_coding_CDS_not_defined,retained_intron	85.9759	-1.86615	0.252174	-7.40026	1.35916e-13	1.30967e-12
ENSG00000164440	TXLNB	taxilin beta [Source:HGNC Symbol;Acc:HGNC:21617]	protein_coding	40.5327	1.59166	0.414074	3.8439	0.000121095	0.000523223
ENSG00000164494	PDSS2	decaprenyl diphosphate synthase subunit 2 [Source:HGNC Symbol;Acc:HGNC:23041]	protein_coding	348.701	-2.15236	0.140343	-15.3364	4.36567e-53	1.5534e-51
ENSG00000164520	RAET1E	retinoic acid early transcript 1E [Source:HGNC Symbol;Acc:HGNC:16793]	nonsense_mediated_decay,protein_coding,protein_coding_CDS_not_defined	27.867	1.92563	0.457691	4.20727	2.58478e-05	0.000122829
ENSG00000164574	GALNT10	polypeptide N-acetylgalactosaminyltransferase 10 [Source:HGNC Symbol;Acc:HGNC:19873]	nonsense_mediated_decay,protein_coding,protein_coding_CDS_not_defined,retained_intron	2337.91	-1.71032	0.055782	-30.6607	1.90051e-206	4.03397e-204
ENSG00000164588	HCN1	hyperpolarization activated cyclic nucleotide gated potassium channel 1 [Source:HGNC Symbol;Acc:HGNC:4845]	protein_coding,protein_coding_CDS_not_defined	202.31	-2.14932	0.178115	-12.0671	1.57667e-33	3.54345e-32
ENSG00000164683	HEY1	hes related family bHLH transcription factor with YRPW motif 1 [Source:HGNC Symbol;Acc:HGNC:4880]	nonsense_mediated_decay,protein_coding,protein_coding_CDS_not_defined,retained_intron	354.678	2.34419	0.135284	17.3279	2.899e-67	1.33849e-65
ENSG00000164684	ZNF704	zinc finger protein 704 [Source:HGNC Symbol;Acc:HGNC:32291]	protein_coding,protein_coding_CDS_not_defined	2665.37	-1.65814	0.0548178	-30.2482	5.51468e-201	1.13889e-198
ENSG00000164808	SPIDR	scaffold protein involved in DNA repair [Source:HGNC Symbol;Acc:HGNC:28971]	nonsense_mediated_decay,protein_coding,protein_coding_CDS_not_defined,retained_intron	2200.31	-1.54995	0.0604391	-25.6448	4.82603e-145	5.80739e-143
ENSG00000164855	TMEM184A	transmembrane protein 184A [Source:HGNC Symbol;Acc:HGNC:28797]	nonsense_mediated_decay,protein_coding,protein_coding_CDS_not_defined,retained_intron	1200.93	1.53797	0.076302	20.1564	2.36523e-90	1.50298e-88
ENSG00000164867	NOS3	nitric oxide synthase 3 [Source:HGNC Symbol;Acc:HGNC:7876]	protein_coding,protein_coding_CDS_not_defined,retained_intron	56.2702	1.8168	0.315325	5.76169	8.3276e-09	5.75867e-08
ENSG00000164879	CA3	carbonic anhydrase 3 [Source:HGNC Symbol;Acc:HGNC:1374]	protein_coding,retained_intron	12.1107	-3.23181	0.824619	-3.91916	8.88583e-05	0.000391517
ENSG00000165061	ZMAT4	zinc finger matrin-type 4 [Source:HGNC Symbol;Acc:HGNC:25844]	nonsense_mediated_decay,protein_coding,protein_coding_CDS_not_defined,retained_intron	40.9119	-3.67273	0.477496	-7.69164	1.45262e-14	1.48891e-13
ENSG00000165071	TMEM71	transmembrane protein 71 [Source:HGNC Symbol;Acc:HGNC:26572]	protein_coding,protein_coding_CDS_not_defined,retained_intron	100.184	1.82589	0.253715	7.19663	6.17184e-13	5.75479e-12
ENSG00000165124	SVEP1	sushi, von Willebrand factor type A, EGF and pentraxin domain containing 1 [Source:HGNC Symbol;Acc:HGNC:15985]	protein_coding,protein_coding_CDS_not_defined	62.6044	1.65556	0.292575	5.65859	1.5262e-08	1.03273e-07
ENSG00000165194	PCDH19	protocadherin 19 [Source:HGNC Symbol;Acc:HGNC:14270]	nonsense_mediated_decay,protein_coding	7.97934	-2.31729	0.906655	-2.55587	0.0105923	0.0311483
ENSG00000165495	PKNOX2	PBX/knotted 1 homeobox 2 [Source:HGNC Symbol;Acc:HGNC:16714]	nonsense_mediated_decay,protein_coding,protein_coding_CDS_not_defined,retained_intron	2.98252	-3.98785	1.63877	-2.43345	0.0149559	0.042307
ENSG00000165675	ENOX2	ecto-NOX disulfide-thiol exchanger 2 [Source:HGNC Symbol;Acc:HGNC:2259]	protein_coding,protein_coding_CDS_not_defined	272.907	-2.40099	0.151166	-15.8831	8.29743e-57	3.15829e-55
ENSG00000165685	TMEM52B	transmembrane protein 52B [Source:HGNC Symbol;Acc:HGNC:26438]	protein_coding,protein_coding_CDS_not_defined,retained_intron	7.09881	3.28132	1.04221	3.14844	0.00164144	0.00581014
ENSG00000165730	STOX1	storkhead box 1 [Source:HGNC Symbol;Acc:HGNC:23508]	protein_coding	15.7204	-2.10367	0.620898	-3.38811	0.000703773	0.00266817
ENSG00000165887	ANKRD2	ankyrin repeat domain 2 [Source:HGNC Symbol;Acc:HGNC:495]	protein_coding	26.9348	1.56868	0.452675	3.46535	0.00052955	0.0020509
ENSG00000165966	PDZRN4	PDZ domain containing ring finger 4 [Source:HGNC Symbol;Acc:HGNC:30552]	protein_coding,retained_intron	2.14863	-4.55848	1.87348	-2.43316	0.0149678	0.0423367
ENSG00000165973	NELL1	neural EGFL like 1 [Source:HGNC Symbol;Acc:HGNC:7750]	protein_coding,protein_coding_CDS_not_defined,retained_intron	200.536	-3.02595	0.204539	-14.794	1.60222e-49	5.29426e-48
ENSG00000165995	CACNB2	calcium voltage-gated channel auxiliary subunit beta 2 [Source:HGNC Symbol;Acc:HGNC:1402]	nonsense_mediated_decay,protein_coding,protein_coding_CDS_not_defined,retained_intron	160.243	-2.04704	0.19997	-10.2367	1.358e-24	2.24e-23
ENSG00000166033	HTRA1	HtrA serine peptidase 1 [Source:HGNC Symbol;Acc:HGNC:9476]	protein_coding	624.863	-1.75059	0.0951915	-18.3901	1.57574e-75	8.26117e-74
ENSG00000166073	GPR176	G protein-coupled receptor 176 [Source:HGNC Symbol;Acc:HGNC:32370]	protein_coding,protein_coding_CDS_not_defined	1647.47	-1.78574	0.0668276	-26.7215	2.64492e-157	3.48457e-155
ENSG00000166167	BTRC	beta-transducin repeat containing E3 ubiquitin protein ligase [Source:HGNC Symbol;Acc:HGNC:1144]	protein_coding,protein_coding_CDS_not_defined	1274.61	-2.24518	0.074262	-30.2333	8.65675e-201	1.77579e-198
ENSG00000166206	GABRB3	gamma-aminobutyric acid type A receptor subunit beta3 [Source:HGNC Symbol;Acc:HGNC:4083]	nonsense_mediated_decay,protein_coding,protein_coding_CDS_not_defined,retained_intron	2057.58	-1.53675	0.058937	-26.0745	7.09171e-150	8.67032e-148
ENSG00000166250	CLMP	CXADR like membrane protein [Source:HGNC Symbol;Acc:HGNC:24039]	protein_coding,protein_coding_CDS_not_defined,retained_intron	129.014	-2.81939	0.237164	-11.8879	1.36762e-32	2.95834e-31
ENSG00000166265	CYYR1	cysteine and tyrosine rich 1 [Source:HGNC Symbol;Acc:HGNC:16274]	protein_coding	273.535	-2.10224	0.162616	-12.9276	3.14356e-38	8.01358e-37
ENSG00000166268	MYRFL	myelin regulatory factor like [Source:HGNC Symbol;Acc:HGNC:26316]	protein_coding	13.0505	2.3372	0.674344	3.46589	0.000528479	0.00204736
ENSG00000166501	PRKCB	protein kinase C beta [Source:HGNC Symbol;Acc:HGNC:9395]	protein_coding,protein_coding_CDS_not_defined,retained_intron	18.8575	-1.99756	0.577998	-3.456	0.000548255	0.00211824
ENSG00000166509	CLEC3A	C-type lectin domain family 3 member A [Source:HGNC Symbol;Acc:HGNC:2052]	nonsense_mediated_decay,protein_coding,protein_coding_CDS_not_defined	65.1688	-2.18651	0.305947	-7.14671	8.88826e-13	8.21498e-12
ENSG00000166670	MMP10	matrix metallopeptidase 10 [Source:HGNC Symbol;Acc:HGNC:7156]	protein_coding	48.6485	1.86735	0.365236	5.11272	3.17551e-07	1.87918e-06
ENSG00000166736	HTR3A	5-hydroxytryptamine receptor 3A [Source:HGNC Symbol;Acc:HGNC:5297]	nonsense_mediated_decay,protein_coding,retained_intron	123.576	2.33939	0.222425	10.5177	7.16179e-26	1.24304e-24
ENSG00000166750	SLFN5	schlafen family member 5 [Source:HGNC Symbol;Acc:HGNC:28286]	protein_coding	4126.19	1.80938	0.0432694	41.8166	0	0
ENSG00000166780	BMERB1	bMERB domain containing 1 [Source:HGNC Symbol;Acc:HGNC:19213]	nonsense_mediated_decay,protein_coding,protein_coding_CDS_not_defined,retained_intron	781.253	-3.26968	0.103314	-31.648	8.07558e-220	1.92836e-217
ENSG00000166863	TAC3	tachykinin precursor 3 [Source:HGNC Symbol;Acc:HGNC:11521]	nonsense_mediated_decay,protein_coding,retained_intron	10.7717	2.14136	0.72676	2.94644	0.00321451	0.0107273
ENSG00000166961	MS4A15	membrane spanning 4-domains A15 [Source:HGNC Symbol;Acc:HGNC:28573]	nonsense_mediated_decay,protein_coding	37.4347	-1.97542	0.384528	-5.13726	2.78775e-07	1.65999e-06
ENSG00000167080	B4GALNT2	beta-1,4-N-acetyl-galactosaminyltransferase 2 [Source:HGNC Symbol;Acc:HGNC:24136]	protein_coding	175.815	2.439	0.189887	12.8444	9.24116e-38	2.33242e-36
ENSG00000167157	PRRX2	paired related homeobox 2 [Source:HGNC Symbol;Acc:HGNC:21338]	protein_coding	140.704	-3.10077	0.229071	-13.5363	9.55228e-42	2.68104e-40
ENSG00000167281	RBFOX3	RNA binding fox-1 homolog 3 [Source:HGNC Symbol;Acc:HGNC:27097]	protein_coding,protein_coding_CDS_not_defined,retained_intron	165.029	-2.84615	0.207528	-13.7145	8.3124e-43	2.39914e-41
ENSG00000167286	CD3D	CD3 delta subunit of T-cell receptor complex [Source:HGNC Symbol;Acc:HGNC:1673]	protein_coding,protein_coding_CDS_not_defined,retained_intron	22.0926	1.77467	0.617697	2.87304	0.00406542	0.0132642
ENSG00000167291	TBC1D16	TBC1 domain family member 16 [Source:HGNC Symbol;Acc:HGNC:28356]	protein_coding	4224.6	-1.56756	0.0527186	-29.7345	2.7475e-194	5.2816e-192
ENSG00000167483	NIBAN3	niban apoptosis regulator 3 [Source:HGNC Symbol;Acc:HGNC:24130]	nonsense_mediated_decay,protein_coding,protein_coding_CDS_not_defined,retained_intron	20.7265	2.66487	0.599952	4.44181	8.92071e-06	4.49343e-05
ENSG00000167487	KLHL26	kelch like family member 26 [Source:HGNC Symbol;Acc:HGNC:25623]	nonsense_mediated_decay,protein_coding,protein_coding_CDS_not_defined	441.951	1.86872	0.120382	15.5232	2.41617e-54	8.75003e-53
ENSG00000167613	LAIR1	leukocyte associated immunoglobulin like receptor 1 [Source:HGNC Symbol;Acc:HGNC:6477]	nonsense_mediated_decay,protein_coding,protein_coding_CDS_not_defined,retained_intron	10.7321	1.9941	0.783744	2.54432	0.010949	0.0321057
ENSG00000167632	TRAPPC9	trafficking protein particle complex subunit 9 [Source:HGNC Symbol;Acc:HGNC:30832]	protein_coding,protein_coding_CDS_not_defined,retained_intron	1052.78	-2.09981	0.0887255	-23.6664	8.00853e-124	7.60188e-122
ENSG00000167654	ATCAY	ATCAY kinesin light chain interacting caytaxin [Source:HGNC Symbol;Acc:HGNC:779]	nonsense_mediated_decay,protein_coding,protein_coding_CDS_not_defined	31.9722	1.76141	0.439969	4.00348	6.24169e-05	0.000280885
ENSG00000167693	NXN	nucleoredoxin [Source:HGNC Symbol;Acc:HGNC:18008]	protein_coding,protein_coding_CDS_not_defined,retained_intron	1526.75	-1.85769	0.0664963	-27.9367	9.56382e-172	1.41217e-169
ENSG00000167723	TRPV3	transient receptor potential cation channel subfamily V member 3 [Source:HGNC Symbol;Acc:HGNC:18084]	nonsense_mediated_decay,protein_coding,retained_intron	24.8458	-1.72691	0.479045	-3.60491	0.000312265	0.00126065
ENSG00000167749	KLK4	kallikrein related peptidase 4 [Source:HGNC Symbol;Acc:HGNC:6365]	nonsense_mediated_decay,protein_coding,protein_coding_CDS_not_defined,retained_intron	10.2406	-2.76621	0.836544	-3.30671	0.00094398	0.00349391
ENSG00000167895	TMC8	transmembrane channel like 8 [Source:HGNC Symbol;Acc:HGNC:20474]	protein_coding,protein_coding_CDS_not_defined,retained_intron	72.668	2.27844	0.30681	7.42621	1.11754e-13	1.08609e-12
ENSG00000167914	GSDMA	gasdermin A [Source:HGNC Symbol;Acc:HGNC:13311]	protein_coding	30.3769	1.74763	0.460803	3.79258	0.00014909	0.000633699
ENSG00000167941	SOST	sclerostin [Source:HGNC Symbol;Acc:HGNC:13771]	protein_coding	13.8918	2.19657	0.669194	3.28241	0.00102923	0.00378697
ENSG00000167972	ABCA3	ATP binding cassette subfamily A member 3 [Source:HGNC Symbol;Acc:HGNC:33]	protein_coding,retained_intron	649.102	2.26996	0.104242	21.7759	3.92369e-105	3.05938e-103
ENSG00000168062	BATF2	basic leucine zipper ATF-like transcription factor 2 [Source:HGNC Symbol;Acc:HGNC:25163]	protein_coding,retained_intron	35.5876	1.72066	0.429642	4.00488	6.20497e-05	0.000279438
ENSG00000168267	PTF1A	pancreas associated transcription factor 1a [Source:HGNC Symbol;Acc:HGNC:23734]	protein_coding	23.1839	-2.2086	0.500873	-4.40949	1.03613e-05	5.17813e-05
ENSG00000168306	ACOX2	acyl-CoA oxidase 2 [Source:HGNC Symbol;Acc:HGNC:120]	nonsense_mediated_decay,protein_coding,protein_coding_CDS_not_defined,retained_intron	146.185	2.59829	0.213596	12.1645	4.80525e-34	1.09524e-32
ENSG00000168334	XIRP1	xin actin binding repeat containing 1 [Source:HGNC Symbol;Acc:HGNC:14301]	protein_coding	14.7354	-1.99127	0.628919	-3.16617	0.00154459	0.00549854
ENSG00000168386	FILIP1L	filamin A interacting protein 1 like [Source:HGNC Symbol;Acc:HGNC:24589]	protein_coding,protein_coding_CDS_not_defined	28.841	2.38284	0.477003	4.99544	5.87021e-07	3.37769e-06
ENSG00000168404	MLKL	mixed lineage kinase domain like pseudokinase [Source:HGNC Symbol;Acc:HGNC:26617]	nonsense_mediated_decay,protein_coding,retained_intron	316.388	1.78995	0.140062	12.7797	2.12842e-37	5.34553e-36
ENSG00000168454	TXNDC2	thioredoxin domain containing 2 [Source:HGNC Symbol;Acc:HGNC:16470]	protein_coding,protein_coding_CDS_not_defined	48.7457	-4.55565	0.516442	-8.82121	1.13225e-18	1.43539e-17
ENSG00000168461	RAB31	RAB31, member RAS oncogene family [Source:HGNC Symbol;Acc:HGNC:9771]	nonsense_mediated_decay,protein_coding,protein_coding_CDS_not_defined,retained_intron	5923.37	-2.07054	0.0453999	-45.6068	0	0
ENSG00000168490	PHYHIP	phytanoyl-CoA 2-hydroxylase interacting protein [Source:HGNC Symbol;Acc:HGNC:16865]	protein_coding,retained_intron	174.992	1.55488	0.172697	9.00353	2.18581e-19	2.86243e-18
ENSG00000168575	SLC20A2	solute carrier family 20 member 2 [Source:HGNC Symbol;Acc:HGNC:10947]	nonsense_mediated_decay,protein_coding,protein_coding_CDS_not_defined,retained_intron	1028.19	-1.61325	0.0754605	-21.3788	2.10625e-101	1.56256e-99
ENSG00000168675	LDLRAD4	low density lipoprotein receptor class A domain containing 4 [Source:HGNC Symbol;Acc:HGNC:1224]	nonsense_mediated_decay,protein_coding,protein_coding_CDS_not_defined,retained_intron	2407.53	-2.61873	0.0639996	-40.9179	0	0
ENSG00000168807	SNTB2	syntrophin beta 2 [Source:HGNC Symbol;Acc:HGNC:11169]	nonsense_mediated_decay,protein_coding,protein_coding_CDS_not_defined	1434.79	-1.95612	0.0692999	-28.2269	2.73482e-175	4.24314e-173
ENSG00000168913	ENHO	energy homeostasis associated [Source:HGNC Symbol;Acc:HGNC:24838]	protein_coding	23.2097	-2.42838	0.506718	-4.79237	1.64822e-06	9.05585e-06
ENSG00000168959	GRM5	glutamate metabotropic receptor 5 [Source:HGNC Symbol;Acc:HGNC:4597]	protein_coding	4.13607	-3.53534	1.4631	-2.41634	0.0156775	0.0440952
ENSG00000169067	ACTBL2	actin beta like 2 [Source:HGNC Symbol;Acc:HGNC:17780]	protein_coding	355.068	2.01861	0.137312	14.7009	6.35783e-49	2.06951e-47
ENSG00000169071	ROR2	receptor tyrosine kinase like orphan receptor 2 [Source:HGNC Symbol;Acc:HGNC:10257]	protein_coding,protein_coding_CDS_not_defined,retained_intron	575.536	-1.98172	0.108818	-18.2113	4.19912e-74	2.13554e-72
ENSG00000169084	DHRSX	dehydrogenase/reductase X-linked [Source:HGNC Symbol;Acc:HGNC:18399]	protein_coding,protein_coding_CDS_not_defined	109.877	-1.64948	0.241634	-6.82634	8.71066e-12	7.49765e-11
ENSG00000169116	PARM1	prostate androgen-regulated mucin-like protein 1 [Source:HGNC Symbol;Acc:HGNC:24536]	protein_coding	358.084	-2.56766	0.143943	-17.838	3.58041e-71	1.75659e-69
ENSG00000169122	FAM110B	family with sequence similarity 110 member B [Source:HGNC Symbol;Acc:HGNC:28587]	protein_coding,protein_coding_CDS_not_defined	178.645	-1.53879	0.19053	-8.07641	6.67034e-16	7.3896e-15
ENSG00000169129	AFAP1L2	actin filament associated protein 1 like 2 [Source:HGNC Symbol;Acc:HGNC:25901]	protein_coding,protein_coding_CDS_not_defined	96.245	1.58568	0.23706	6.68892	2.24831e-11	1.88531e-10
ENSG00000169181	GSG1L	GSG1 like [Source:HGNC Symbol;Acc:HGNC:28283]	nonsense_mediated_decay,protein_coding	16.4272	-4.23775	0.822148	-5.15449	2.54319e-07	1.52149e-06
ENSG00000169245	CXCL10	C-X-C motif chemokine ligand 10 [Source:HGNC Symbol;Acc:HGNC:10637]	protein_coding	8.22504	3.96204	1.11288	3.56017	0.000370609	0.00147688
ENSG00000169393	ELSPBP1	epididymal sperm binding protein 1 [Source:HGNC Symbol;Acc:HGNC:14417]	protein_coding	31.8916	1.54976	0.472302	3.2813	0.00103331	0.00380024
ENSG00000169410	PTPN9	protein tyrosine phosphatase non-receptor type 9 [Source:HGNC Symbol;Acc:HGNC:9661]	protein_coding,protein_coding_CDS_not_defined,retained_intron	870.602	-2.20467	0.0860088	-25.633	6.53788e-145	7.83648e-143
ENSG00000169418	NPR1	natriuretic peptide receptor 1 [Source:HGNC Symbol;Acc:HGNC:7943]	protein_coding,protein_coding_CDS_not_defined,retained_intron	42.6075	1.78179	0.384105	4.63882	3.50397e-06	1.85132e-05
ENSG00000169429	CXCL8	C-X-C motif chemokine ligand 8 [Source:HGNC Symbol;Acc:HGNC:6025]	nonsense_mediated_decay,protein_coding,retained_intron	57.7967	2.15426	0.372544	5.78257	7.35697e-09	5.1071e-08
ENSG00000169436	COL22A1	collagen type XXII alpha 1 chain [Source:HGNC Symbol;Acc:HGNC:22989]	protein_coding,protein_coding_CDS_not_defined	984.918	-2.55644	0.0965777	-26.4703	2.13249e-154	2.73864e-152
ENSG00000169439	SDC2	syndecan 2 [Source:HGNC Symbol;Acc:HGNC:10659]	protein_coding,protein_coding_CDS_not_defined	3608.65	-2.87045	0.0577715	-49.6862	0	0
ENSG00000169508	GPR183	G protein-coupled receptor 183 [Source:HGNC Symbol;Acc:HGNC:3128]	protein_coding	4.93814	5.7549	1.49312	3.85427	0.000116073	0.000502305
ENSG00000169618	PROKR1	prokineticin receptor 1 [Source:HGNC Symbol;Acc:HGNC:4524]	protein_coding	25.2797	1.74889	0.474868	3.68289	0.000230601	0.000951575
ENSG00000169744	LDB2	LIM domain binding 2 [Source:HGNC Symbol;Acc:HGNC:6533]	nonsense_mediated_decay,protein_coding,protein_coding_CDS_not_defined,retained_intron	28.0399	-2.21392	0.457752	-4.83649	1.32152e-06	7.3307e-06
ENSG00000169756	LIMS1	LIM zinc finger domain containing 1 [Source:HGNC Symbol;Acc:HGNC:6616]	nonsense_mediated_decay,protein_coding,protein_coding_CDS_not_defined,retained_intron	6705.85	-1.66139	0.050948	-32.6095	3.00961e-233	8.06919e-231
ENSG00000169760	NLGN1	neuroligin 1 [Source:HGNC Symbol;Acc:HGNC:14291]	protein_coding,protein_coding_CDS_not_defined	142.454	-2.7045	0.238077	-11.3598	6.63179e-30	1.32225e-28
ENSG00000169855	ROBO1	roundabout guidance receptor 1 [Source:HGNC Symbol;Acc:HGNC:10249]	nonsense_mediated_decay,protein_coding,protein_coding_CDS_not_defined,retained_intron	3696.46	-2.28514	0.0532417	-42.9201	0	0
ENSG00000169862	CTNND2	catenin delta 2 [Source:HGNC Symbol;Acc:HGNC:2516]	nonsense_mediated_decay,protein_coding,protein_coding_CDS_not_defined,retained_intron	132.42	-3.03916	0.236127	-12.8709	6.56643e-38	1.66329e-36
ENSG00000169896	ITGAM	integrin subunit alpha M [Source:HGNC Symbol;Acc:HGNC:6149]	protein_coding,retained_intron	18.943	2.22803	0.670865	3.32114	0.000896511	0.00333315
ENSG00000169918	OTUD7A	OTU deubiquitinase 7A [Source:HGNC Symbol;Acc:HGNC:20718]	nonsense_mediated_decay,protein_coding,retained_intron	33.8102	-2.27593	0.414299	-5.49345	3.94149e-08	2.56924e-07
ENSG00000169933	FRMPD4	FERM and PDZ domain containing 4 [Source:HGNC Symbol;Acc:HGNC:29007]	protein_coding,protein_coding_CDS_not_defined	102.571	-4.30115	0.336747	-12.7727	2.33039e-37	5.84798e-36
ENSG00000169946	ZFPM2	zinc finger protein, FOG family member 2 [Source:HGNC Symbol;Acc:HGNC:16700]	protein_coding,protein_coding_CDS_not_defined	375.453	-2.01207	0.125183	-16.073	3.94681e-58	1.54858e-56
ENSG00000170006	TMEM154	transmembrane protein 154 [Source:HGNC Symbol;Acc:HGNC:26489]	nonsense_mediated_decay,protein_coding,protein_coding_CDS_not_defined,retained_intron	674.443	1.91439	0.0973167	19.6717	3.76656e-86	2.3025e-84
ENSG00000170035	UBE2E3	ubiquitin conjugating enzyme E2 E3 [Source:HGNC Symbol;Acc:HGNC:12479]	protein_coding,protein_coding_CDS_not_defined,retained_intron	5351.64	-1.57332	0.0436115	-36.0757	5.44597e-285	2.21941e-282
ENSG00000170153	RNF150	ring finger protein 150 [Source:HGNC Symbol;Acc:HGNC:23138]	protein_coding,protein_coding_CDS_not_defined	1848.71	-1.96805	0.0736846	-26.7091	3.69222e-157	4.84346e-155
ENSG00000170209	ANKK1	ankyrin repeat and kinase domain containing 1 [Source:HGNC Symbol;Acc:HGNC:21027]	nonsense_mediated_decay,protein_coding	53.5996	2.86383	0.371027	7.71865	1.17567e-14	1.21195e-13
ENSG00000170293	CMTM8	CKLF like MARVEL transmembrane domain containing 8 [Source:HGNC Symbol;Acc:HGNC:19179]	protein_coding	641.479	-1.51969	0.0954087	-15.9282	4.03619e-57	1.54401e-55
ENSG00000170298	LGALS9B	galectin 9B [Source:HGNC Symbol;Acc:HGNC:24842]	nonsense_mediated_decay,protein_coding,retained_intron	2.81482	4.94267	1.69334	2.91889	0.00351284	0.0116189
ENSG00000170310	STX8	syntaxin 8 [Source:HGNC Symbol;Acc:HGNC:11443]	nonsense_mediated_decay,protein_coding,protein_coding_CDS_not_defined,retained_intron	458.257	-2.86184	0.129262	-22.1398	1.30671e-108	1.05941e-106
ENSG00000170381	SEMA3E	semaphorin 3E [Source:HGNC Symbol;Acc:HGNC:10727]	nonsense_mediated_decay,protein_coding,protein_coding_CDS_not_defined	1939.14	-5.3133	0.101165	-52.521	0	0
ENSG00000170430	MGMT	O-6-methylguanine-DNA methyltransferase [Source:HGNC Symbol;Acc:HGNC:7059]	protein_coding,protein_coding_CDS_not_defined,retained_intron	230.681	-3.39843	0.194864	-17.44	4.10031e-68	1.90755e-66
ENSG00000170485	NPAS2	neuronal PAS domain protein 2 [Source:HGNC Symbol;Acc:HGNC:7895]	protein_coding,protein_coding_CDS_not_defined,retained_intron	533.57	-1.90608	0.113137	-16.8475	1.0937e-63	4.72162e-62
ENSG00000170577	SIX2	SIX homeobox 2 [Source:HGNC Symbol;Acc:HGNC:10888]	protein_coding	226.805	2.09089	0.163021	12.8259	1.17461e-37	2.95975e-36
ENSG00000170579	DLGAP1	DLG associated protein 1 [Source:HGNC Symbol;Acc:HGNC:2905]	protein_coding,protein_coding_CDS_not_defined	42.7753	-2.2065	0.381338	-5.78621	7.19919e-09	5.00781e-08
ENSG00000170608	FOXA3	forkhead box A3 [Source:HGNC Symbol;Acc:HGNC:5023]	protein_coding	11.7805	2.44647	0.76888	3.18187	0.00146329	0.00522738
ENSG00000170624	SGCD	sarcoglycan delta [Source:HGNC Symbol;Acc:HGNC:10807]	nonsense_mediated_decay,protein_coding	5.95767	-2.99593	1.11753	-2.68086	0.00734335	0.0225306
ENSG00000170786	SDR16C5	short chain dehydrogenase/reductase family 16C member 5 [Source:HGNC Symbol;Acc:HGNC:30311]	protein_coding	27.1391	1.82746	0.447358	4.08502	4.40738e-05	0.000202665
ENSG00000170807	LMOD2	leiomodin 2 [Source:HGNC Symbol;Acc:HGNC:6648]	protein_coding	4.59657	3.04679	1.26073	2.41669	0.0156622	0.0440644
ENSG00000170915	PAQR8	progestin and adipoQ receptor family member 8 [Source:HGNC Symbol;Acc:HGNC:15708]	protein_coding	249.575	-1.55153	0.15122	-10.2601	1.06612e-24	1.7681e-23
ENSG00000170961	HAS2	hyaluronan synthase 2 [Source:HGNC Symbol;Acc:HGNC:4819]	protein_coding	832.966	-1.88338	0.107949	-17.4469	3.63598e-68	1.69929e-66
ENSG00000170962	PDGFD	platelet derived growth factor D [Source:HGNC Symbol;Acc:HGNC:30620]	protein_coding	153.822	-2.84059	0.214695	-13.2308	5.82442e-40	1.55615e-38
ENSG00000170965	PLAC1	placenta enriched 1 [Source:HGNC Symbol;Acc:HGNC:9044]	protein_coding,protein_coding_CDS_not_defined	50.9178	-2.09677	0.391267	-5.35891	8.37261e-08	5.29065e-07
ENSG00000171004	HS6ST2	heparan sulfate 6-O-sulfotransferase 2 [Source:HGNC Symbol;Acc:HGNC:19133]	protein_coding,protein_coding_CDS_not_defined	325.332	-3.47743	0.169952	-20.4612	4.77092e-93	3.18391e-91
ENSG00000171017	LRRC8E	leucine rich repeat containing 8 VRAC subunit E [Source:HGNC Symbol;Acc:HGNC:26272]	protein_coding	48.2614	1.65953	0.337393	4.91867	8.71358e-07	4.93114e-06
ENSG00000171033	PKIA	cAMP-dependent protein kinase inhibitor alpha [Source:HGNC Symbol;Acc:HGNC:9017]	protein_coding	293.476	-3.42386	0.180918	-18.925	7.10521e-80	3.91299e-78
ENSG00000171051	FPR1	formyl peptide receptor 1 [Source:HGNC Symbol;Acc:HGNC:3826]	protein_coding	15.4966	2.28007	0.661882	3.44482	0.000571432	0.00220056
ENSG00000171056	SOX7	SRY-box transcription factor 7 [Source:HGNC Symbol;Acc:HGNC:18196]	protein_coding	10.7632	-2.30585	0.754001	-3.05815	0.00222707	0.00768984
ENSG00000171094	ALK	ALK receptor tyrosine kinase [Source:HGNC Symbol;Acc:HGNC:427]	nonsense_mediated_decay,protein_coding,protein_coding_CDS_not_defined	72.6351	1.57463	0.288583	5.45639	4.85902e-08	3.1432e-07
ENSG00000171189	GRIK1	glutamate ionotropic receptor kainate type subunit 1 [Source:HGNC Symbol;Acc:HGNC:4579]	protein_coding,protein_coding_CDS_not_defined	16.5558	-2.62597	0.61562	-4.26557	1.99394e-05	9.634e-05
ENSG00000171346	KRT15	keratin 15 [Source:HGNC Symbol;Acc:HGNC:6421]	nonsense_mediated_decay,protein_coding,retained_intron	282.249	2.36306	0.159556	14.8102	1.25837e-49	4.17159e-48
ENSG00000171365	CLCN5	chloride voltage-gated channel 5 [Source:HGNC Symbol;Acc:HGNC:2023]	nonsense_mediated_decay,protein_coding	829.185	-1.71039	0.0900449	-18.9948	1.88141e-80	1.04746e-78
ENSG00000171385	KCND3	potassium voltage-gated channel subfamily D member 3 [Source:HGNC Symbol;Acc:HGNC:6239]	protein_coding,protein_coding_CDS_not_defined,retained_intron	206.007	-2.19202	0.173253	-12.6521	1.08898e-36	2.66277e-35
ENSG00000171657	GPR82	G protein-coupled receptor 82 [Source:HGNC Symbol;Acc:HGNC:4533]	protein_coding,protein_coding_CDS_not_defined	6.26597	5.09738	1.42371	3.58035	0.000343134	0.00137564
ENSG00000171659	GPR34	G protein-coupled receptor 34 [Source:HGNC Symbol;Acc:HGNC:4490]	protein_coding	5.79435	2.58317	1.025	2.52016	0.0117303	0.0341267
ENSG00000171723	GPHN	gephyrin [Source:HGNC Symbol;Acc:HGNC:15465]	nonsense_mediated_decay,protein_coding,protein_coding_CDS_not_defined,retained_intron	1423.83	-2.02331	0.0667734	-30.3011	1.10725e-201	2.30225e-199
ENSG00000171747	LGALS4	galectin 4 [Source:HGNC Symbol;Acc:HGNC:6565]	nonsense_mediated_decay,protein_coding,protein_coding_CDS_not_defined,retained_intron	20.8479	1.61521	0.544635	2.96568	0.0030201	0.0101328
ENSG00000171840	NINJ2	ninjurin 2 [Source:HGNC Symbol;Acc:HGNC:7825]	protein_coding,protein_coding_CDS_not_defined	33.1792	-1.66492	0.413468	-4.02672	5.65608e-05	0.000256002
ENSG00000171864	PRND	prion like protein doppel [Source:HGNC Symbol;Acc:HGNC:15748]	protein_coding	26.5472	-3.91296	0.607474	-6.44137	1.184e-10	9.48845e-10
ENSG00000171877	FRMD5	FERM domain containing 5 [Source:HGNC Symbol;Acc:HGNC:28214]	nonsense_mediated_decay,protein_coding,retained_intron	2348.58	-2.46352	0.0668321	-36.8613	1.92807e-297	8.41877e-295
ENSG00000171889	MIR31HG	MIR31 host gene [Source:HGNC Symbol;Acc:HGNC:37187]	lncRNA	4.82216	-4.70998	1.49838	-3.14337	0.00167012	0.00590347
ENSG00000171951	SCG2	secretogranin II [Source:HGNC Symbol;Acc:HGNC:10575]	protein_coding	66.5886	-1.5082	0.299597	-5.0341	4.80089e-07	2.78654e-06
ENSG00000172086	KRCC1	lysine rich coiled-coil 1 [Source:HGNC Symbol;Acc:HGNC:28039]	protein_coding	239.2	1.96029	0.155153	12.6346	1.36148e-36	3.32113e-35
ENSG00000172164	SNTB1	syntrophin beta 1 [Source:HGNC Symbol;Acc:HGNC:11168]	nonsense_mediated_decay,protein_coding,protein_coding_CDS_not_defined	242.489	-1.78558	0.153288	-11.6486	2.33395e-31	4.8397e-30
ENSG00000172209	GPR22	G protein-coupled receptor 22 [Source:HGNC Symbol;Acc:HGNC:4477]	protein_coding,protein_coding_CDS_not_defined,retained_intron	5.27369	2.80134	1.12488	2.49035	0.0127617	0.0367046
ENSG00000172260	NEGR1	neuronal growth regulator 1 [Source:HGNC Symbol;Acc:HGNC:17302]	protein_coding,protein_coding_CDS_not_defined	1911.41	-5.82141	0.116843	-49.8226	0	0
ENSG00000172264	MACROD2	mono-ADP ribosylhydrolase 2 [Source:HGNC Symbol;Acc:HGNC:16126]	protein_coding,protein_coding_CDS_not_defined	60.6159	-1.81883	0.307005	-5.92442	3.13399e-09	2.2523e-08
ENSG00000172318	B3GALT1	beta-1,3-galactosyltransferase 1 [Source:HGNC Symbol;Acc:HGNC:916]	protein_coding	12.1008	-3.77628	0.879296	-4.29467	1.74954e-05	8.51365e-05
ENSG00000172340	SUCLG2	succinate-CoA ligase GDP-forming subunit beta [Source:HGNC Symbol;Acc:HGNC:11450]	protein_coding	1707.36	-1.94549	0.0615387	-31.6142	2.35894e-219	5.54624e-217
ENSG00000172379	ARNT2	aryl hydrocarbon receptor nuclear translocator 2 [Source:HGNC Symbol;Acc:HGNC:16876]	protein_coding,protein_coding_CDS_not_defined,retained_intron	607.391	-2.4751	0.113614	-21.7852	3.20686e-105	2.50685e-103
ENSG00000172399	MYOZ2	myozenin 2 [Source:HGNC Symbol;Acc:HGNC:1330]	protein_coding	17.1751	1.88791	0.602017	3.13597	0.00171285	0.0060454
ENSG00000172404	DNAJB7	DnaJ heat shock protein family (Hsp40) member B7 [Source:HGNC Symbol;Acc:HGNC:24986]	protein_coding	11.4316	-1.73314	0.668838	-2.59127	0.00956225	0.0284919
ENSG00000172458	IL17D	interleukin 17D [Source:HGNC Symbol;Acc:HGNC:5984]	nonsense_mediated_decay,protein_coding	27.5079	-2.43637	0.481728	-5.05757	4.24641e-07	2.48025e-06
ENSG00000172460	PRSS30P	serine protease 30, pseudogene [Source:HGNC Symbol;Acc:HGNC:28753]	transcribed_unitary_pseudogene	22.2048	1.85222	0.533048	3.47477	0.000511296	0.00198675
ENSG00000172461	FUT9	fucosyltransferase 9 [Source:HGNC Symbol;Acc:HGNC:4020]	protein_coding,protein_coding_CDS_not_defined	70.3347	-3.26873	0.336916	-9.70191	2.95908e-22	4.45758e-21
ENSG00000172519	OR10H5	olfactory receptor family 10 subfamily H member 5 [Source:HGNC Symbol;Acc:HGNC:15389]	protein_coding	3.60871	4.2738	1.59295	2.68294	0.00729785	0.0224067
ENSG00000172554	SNTG2	syntrophin gamma 2 [Source:HGNC Symbol;Acc:HGNC:13741]	nonsense_mediated_decay,protein_coding,protein_coding_CDS_not_defined	8.122	-2.59232	0.953175	-2.71967	0.00653474	0.0203313
ENSG00000172789	HOXC5	homeobox C5 [Source:HGNC Symbol;Acc:HGNC:5127]	protein_coding	9.97573	2.3277	0.796989	2.92061	0.00349341	0.0115609
ENSG00000172817	CYP7B1	cytochrome P450 family 7 subfamily B member 1 [Source:HGNC Symbol;Acc:HGNC:2652]	protein_coding,protein_coding_CDS_not_defined	239.227	-2.65644	0.166401	-15.9641	2.27141e-57	8.77693e-56
ENSG00000172901	LVRN	laeverin [Source:HGNC Symbol;Acc:HGNC:26904]	nonsense_mediated_decay,protein_coding,protein_coding_CDS_not_defined,retained_intron	10.747	-3.94051	0.999725	-3.9416	8.09415e-05	0.000358807
ENSG00000172915	NBEA	neurobeachin [Source:HGNC Symbol;Acc:HGNC:7648]	nonsense_mediated_decay,protein_coding,protein_coding_CDS_not_defined,retained_intron	359.556	-2.43613	0.146132	-16.6708	2.13812e-62	9.03894e-61
ENSG00000172965	MIR4435-2HG	MIR4435-2 host gene [Source:HGNC Symbol;Acc:HGNC:35163]	lncRNA,retained_intron	3461.79	-2.4998	0.0576853	-43.3351	0	0
ENSG00000172985	SH3RF3	SH3 domain containing ring finger 3 [Source:HGNC Symbol;Acc:HGNC:24699]	protein_coding	768.584	-2.44192	0.0941175	-25.9455	2.04556e-148	2.47125e-146
ENSG00000173068	BNC2	basonuclin 2 [Source:HGNC Symbol;Acc:HGNC:30988]	nonsense_mediated_decay,protein_coding	1795.41	-2.4368	0.0678499	-35.9145	1.81478e-282	7.20373e-280
ENSG00000173077	DELEC1	deleted in esophageal cancer 1 [Source:HGNC Symbol;Acc:HGNC:23658]	lncRNA	36.6537	1.73599	0.399072	4.35008	1.36086e-05	6.70881e-05
ENSG00000173163	COMMD1	copper metabolism domain containing 1 [Source:HGNC Symbol;Acc:HGNC:23024]	nonsense_mediated_decay,protein_coding,protein_coding_CDS_not_defined,retained_intron	614.916	-4.09448	0.144835	-28.27	8.07656e-176	1.25949e-173
ENSG00000173212	MAB21L3	mab-21 like 3 [Source:HGNC Symbol;Acc:HGNC:26787]	protein_coding,protein_coding_CDS_not_defined	22.6065	3.51238	0.61204	5.73882	9.53395e-09	6.57206e-08
ENSG00000173237	C11orf86	chromosome 11 open reading frame 86 [Source:HGNC Symbol;Acc:HGNC:34442]	protein_coding	44.0843	3.62149	0.450483	8.03911	9.04922e-16	9.93853e-15
ENSG00000173267	SNCG	synuclein gamma [Source:HGNC Symbol;Acc:HGNC:11141]	protein_coding,protein_coding_CDS_not_defined	596.131	2.82731	0.116777	24.2113	1.69355e-129	1.72545e-127
ENSG00000173391	OLR1	oxidized low density lipoprotein receptor 1 [Source:HGNC Symbol;Acc:HGNC:8133]	protein_coding,retained_intron	34.4592	1.85462	0.396603	4.67627	2.92138e-06	1.55859e-05
ENSG00000173406	DAB1	DAB adaptor protein 1 [Source:HGNC Symbol;Acc:HGNC:2661]	protein_coding,protein_coding_CDS_not_defined	87.0714	-4.26836	0.358876	-11.8937	1.27639e-32	2.76687e-31
ENSG00000173597	SULT1B1	sulfotransferase family 1B member 1 [Source:HGNC Symbol;Acc:HGNC:17845]	protein_coding	5.90934	2.62037	1.07989	2.42652	0.0152443	0.0430232
ENSG00000173611	SCAI	suppressor of cancer cell invasion [Source:HGNC Symbol;Acc:HGNC:26709]	nonsense_mediated_decay,protein_coding,protein_coding_CDS_not_defined,retained_intron	319.3	-1.52839	0.130868	-11.6789	1.6342e-31	3.41183e-30
ENSG00000173801	JUP	junction plakoglobin [Source:HGNC Symbol;Acc:HGNC:6207]	protein_coding,retained_intron	2747.31	1.54467	0.0532123	29.0284	2.88077e-185	4.94668e-183
ENSG00000173805	HAP1	huntingtin associated protein 1 [Source:HGNC Symbol;Acc:HGNC:4812]	protein_coding	408.729	2.11222	0.127496	16.5669	1.20996e-61	5.04537e-60
ENSG00000173838	MARCHF10	membrane associated ring-CH-type finger 10 [Source:HGNC Symbol;Acc:HGNC:26655]	protein_coding,protein_coding_CDS_not_defined	48.1369	2.48742	0.383849	6.48019	9.1605e-11	7.39152e-10
ENSG00000173868	PHOSPHO1	phosphoethanolamine/phosphocholine phosphatase 1 [Source:HGNC Symbol;Acc:HGNC:16815]	protein_coding	153.625	1.54183	0.197516	7.8061	5.89835e-15	6.1953e-14
ENSG00000174099	MSRB3	methionine sulfoxide reductase B3 [Source:HGNC Symbol;Acc:HGNC:27375]	nonsense_mediated_decay,protein_coding,protein_coding_CDS_not_defined,retained_intron	1465.16	-2.3157	0.0710244	-32.6042	3.5715e-233	9.49243e-231
ENSG00000174125	TLR1	toll like receptor 1 [Source:HGNC Symbol;Acc:HGNC:11847]	protein_coding,protein_coding_CDS_not_defined	46.4188	-1.64536	0.336399	-4.89109	1.00277e-06	5.63929e-06
ENSG00000174343	CHRNA9	cholinergic receptor nicotinic alpha 9 subunit [Source:HGNC Symbol;Acc:HGNC:14079]	protein_coding,protein_coding_CDS_not_defined	344.971	3.75966	0.17536	21.4396	5.70586e-102	4.26405e-100
ENSG00000174460	ZCCHC12	zinc finger CCHC-type containing 12 [Source:HGNC Symbol;Acc:HGNC:27273]	protein_coding	2.1625	-4.56642	1.84229	-2.47866	0.0131875	0.0377908
ENSG00000174482	LINGO2	leucine rich repeat and Ig domain containing 2 [Source:HGNC Symbol;Acc:HGNC:21207]	protein_coding,protein_coding_CDS_not_defined	58.3684	-5.23286	1.04667	-4.99955	5.74628e-07	3.3095e-06
ENSG00000174498	IGDCC3	immunoglobulin superfamily DCC subclass member 3 [Source:HGNC Symbol;Acc:HGNC:9700]	protein_coding,protein_coding_CDS_not_defined,retained_intron	26.592	1.94832	0.462755	4.21027	2.55062e-05	0.000121376
ENSG00000174502	SLC26A9	solute carrier family 26 member 9 [Source:HGNC Symbol;Acc:HGNC:14469]	protein_coding,retained_intron	51.5905	1.53139	0.314471	4.86973	1.11749e-06	6.25571e-06
ENSG00000174564	IL20RB	interleukin 20 receptor subunit beta [Source:HGNC Symbol;Acc:HGNC:6004]	nonsense_mediated_decay,protein_coding,protein_coding_CDS_not_defined	32.9594	-2.28621	0.424222	-5.38919	7.07742e-08	4.50669e-07
ENSG00000174600	CMKLR1	chemerin chemokine-like receptor 1 [Source:HGNC Symbol;Acc:HGNC:2121]	protein_coding	53.8312	-2.32594	0.388223	-5.99125	2.08229e-09	1.52116e-08
ENSG00000174640	SLCO2A1	solute carrier organic anion transporter family member 2A1 [Source:HGNC Symbol;Acc:HGNC:10955]	nonsense_mediated_decay,protein_coding,protein_coding_CDS_not_defined,retained_intron	413.123	-3.31671	0.145241	-22.8359	2.01612e-115	1.76065e-113
ENSG00000174791	RIN1	Ras and Rab interactor 1 [Source:HGNC Symbol;Acc:HGNC:18749]	nonsense_mediated_decay,protein_coding,protein_coding_CDS_not_defined,retained_intron	1837.38	1.58663	0.0622791	25.4761	3.62824e-143	4.26528e-141
ENSG00000174792	ODAPH	odontogenesis associated phosphoprotein [Source:HGNC Symbol;Acc:HGNC:26300]	nonsense_mediated_decay,protein_coding,protein_coding_CDS_not_defined	517.844	2.97759	0.127581	23.3388	1.78918e-120	1.65716e-118
ENSG00000174912	METTL15P1	methyltransferase like 15 pseudogene 1 [Source:HGNC Symbol;Acc:HGNC:31926]	processed_pseudogene	6.95401	-2.59399	0.938441	-2.76415	0.00570712	0.0179889
ENSG00000174944	P2RY14	purinergic receptor P2Y14 [Source:HGNC Symbol;Acc:HGNC:16442]	protein_coding	10.8835	3.31317	0.843453	3.92811	8.56161e-05	0.000378322
ENSG00000175048	ZDHHC14	zinc finger DHHC-type palmitoyltransferase 14 [Source:HGNC Symbol;Acc:HGNC:20341]	nonsense_mediated_decay,protein_coding,protein_coding_CDS_not_defined,retained_intron	329.447	-1.71315	0.142455	-12.0259	2.59809e-33	5.78374e-32
ENSG00000175084	DES	desmin [Source:HGNC Symbol;Acc:HGNC:2770]	protein_coding,retained_intron	18.7295	1.59638	0.559842	2.85148	0.00435161	0.0141002
ENSG00000175115	PACS1	phosphofurin acidic cluster sorting protein 1 [Source:HGNC Symbol;Acc:HGNC:30032]	nonsense_mediated_decay,protein_coding,retained_intron	2171.11	-1.54463	0.0636012	-24.2862	2.74283e-130	2.81324e-128
ENSG00000175175	PPM1E	protein phosphatase, Mg2+/Mn2+ dependent 1E [Source:HGNC Symbol;Acc:HGNC:19322]	protein_coding	259.812	-3.26545	0.177966	-18.3488	3.37606e-75	1.75791e-73
ENSG00000175198	PCCA	propionyl-CoA carboxylase subunit alpha [Source:HGNC Symbol;Acc:HGNC:8653]	nonsense_mediated_decay,protein_coding,protein_coding_CDS_not_defined,retained_intron	367.719	-1.5122	0.13086	-11.5559	6.89437e-31	1.41143e-29
ENSG00000175315	CST6	cystatin E/M [Source:HGNC Symbol;Acc:HGNC:2478]	protein_coding	91.0956	1.75085	0.297533	5.88456	3.9912e-09	2.83898e-08
ENSG00000175329	ISX	intestine specific homeobox [Source:HGNC Symbol;Acc:HGNC:28084]	protein_coding	25.056	2.2674	0.508589	4.45822	8.26431e-06	4.18002e-05
ENSG00000175497	DPP10	dipeptidyl peptidase like 10 [Source:HGNC Symbol;Acc:HGNC:20823]	nonsense_mediated_decay,protein_coding,protein_coding_CDS_not_defined,retained_intron	224.198	-3.91901	0.212313	-18.4586	4.44425e-76	2.34609e-74
ENSG00000175518	UBQLNL	ubiquilin like [Source:HGNC Symbol;Acc:HGNC:28294]	protein_coding	10.1183	-2.04313	0.777345	-2.62834	0.00858028	0.0258789
ENSG00000175591	P2RY2	purinergic receptor P2Y2 [Source:HGNC Symbol;Acc:HGNC:8541]	protein_coding	61.4684	2.4312	0.316259	7.68736	1.502e-14	1.53798e-13
ENSG00000175604		novel transcript, antisense to SNX29	lncRNA	1.97646	4.43371	1.86544	2.37677	0.017465	0.0484041
ENSG00000175806	MSRA	methionine sulfoxide reductase A [Source:HGNC Symbol;Acc:HGNC:7377]	protein_coding,protein_coding_CDS_not_defined,retained_intron	340.51	-2.29846	0.135596	-16.9509	1.89684e-64	8.28241e-63
ENSG00000175841	FAM172BP	family with sequence similarity 172 member B, pseudogene [Source:HGNC Symbol;Acc:HGNC:34336]	processed_pseudogene	10.7669	5.89399	1.32592	4.44521	8.78057e-06	4.4243e-05
ENSG00000175877	TMEM270	transmembrane protein 270 [Source:HGNC Symbol;Acc:HGNC:23018]	nonsense_mediated_decay,protein_coding	10.8995	3.60095	0.888961	4.05074	5.10553e-05	0.000232634
ENSG00000175899	A2M	alpha-2-macroglobulin [Source:HGNC Symbol;Acc:HGNC:7]	nonsense_mediated_decay,protein_coding,protein_coding_CDS_not_defined,retained_intron	1658.44	-2.31494	0.0815002	-28.4041	1.79989e-177	2.85045e-175
ENSG00000175928	LRRN1	leucine rich repeat neuronal 1 [Source:HGNC Symbol;Acc:HGNC:20980]	protein_coding,protein_coding_CDS_not_defined,retained_intron	4238.49	-3.20749	0.0634632	-50.5411	0	0
ENSG00000175985	PLEKHD1	pleckstrin homology and coiled-coil domain containing D1 [Source:HGNC Symbol;Acc:HGNC:20148]	protein_coding,retained_intron	27.9986	-2.15871	0.449581	-4.8016	1.574e-06	8.65898e-06
ENSG00000176049	JAKMIP2	janus kinase and microtubule interacting protein 2 [Source:HGNC Symbol;Acc:HGNC:29067]	protein_coding,retained_intron	653.391	-4.18703	0.13859	-30.2116	1.6682e-200	3.39923e-198
ENSG00000176349		novel transcript, antisense to MAD1L1	lncRNA	7.21779	2.64871	1.0237	2.58738	0.00967085	0.0287734
ENSG00000176533	GNG7	G protein subunit gamma 7 [Source:HGNC Symbol;Acc:HGNC:4410]	nonsense_mediated_decay,protein_coding	395.941	-3.16122	0.140084	-22.5666	9.22848e-113	7.79195e-111
ENSG00000176658	MYO1D	myosin ID [Source:HGNC Symbol;Acc:HGNC:7598]	nonsense_mediated_decay,protein_coding,protein_coding_CDS_not_defined,retained_intron,TEC	1232.54	-2.97348	0.0828245	-35.901	2.9487e-282	1.15548e-279
ENSG00000176746	MAGEB6	MAGE family member B6 [Source:HGNC Symbol;Acc:HGNC:23796]	protein_coding	24.9727	2.00299	0.516798	3.87578	0.000106286	0.00046257
ENSG00000176754	LINC00303	long intergenic non-protein coding RNA 303 [Source:HGNC Symbol;Acc:HGNC:26865]	lncRNA	6.13312	-4.13129	1.2942	-3.19216	0.00141212	0.00506173
ENSG00000176774	MAGEB18	MAGE family member B18 [Source:HGNC Symbol;Acc:HGNC:28515]	protein_coding	4.77019	3.10749	1.25002	2.48595	0.0129205	0.0371127
ENSG00000176884	GRIN1	glutamate ionotropic receptor NMDA type subunit 1 [Source:HGNC Symbol;Acc:HGNC:4584]	nonsense_mediated_decay,protein_coding,protein_coding_CDS_not_defined,retained_intron	13.7559	2.56191	0.678531	3.77566	0.000159583	0.000675387
ENSG00000176907	TCIM	transcriptional and immune response regulator [Source:HGNC Symbol;Acc:HGNC:1357]	protein_coding	50.3952	3.68073	0.4242	8.67687	4.06808e-18	5.04425e-17
ENSG00000176919	C8G	complement C8 gamma chain [Source:HGNC Symbol;Acc:HGNC:1354]	nonsense_mediated_decay,protein_coding,protein_coding_CDS_not_defined,retained_intron	20.555	1.84174	0.526236	3.49984	0.000465531	0.00182422
ENSG00000176920	FUT2	fucosyltransferase 2 [Source:HGNC Symbol;Acc:HGNC:4013]	protein_coding,protein_coding_CDS_not_defined	73.4494	1.57957	0.291125	5.42576	5.77088e-08	3.70561e-07
ENSG00000176928	GCNT4	glucosaminyl (N-acetyl) transferase 4 [Source:HGNC Symbol;Acc:HGNC:17973]	protein_coding	60.7651	2.21405	0.318481	6.95189	3.60418e-12	3.18479e-11
ENSG00000176945	MUC20	mucin 20, cell surface associated [Source:HGNC Symbol;Acc:HGNC:23282]	protein_coding,protein_coding_CDS_not_defined,retained_intron	117.594	1.75741	0.245054	7.17153	7.41655e-13	6.8839e-12
ENSG00000177076	ACER2	alkaline ceramidase 2 [Source:HGNC Symbol;Acc:HGNC:23675]	protein_coding	510.783	1.5288	0.113478	13.4722	2.28002e-41	6.32385e-40
ENSG00000177138	FAM9B	family with sequence similarity 9 member B [Source:HGNC Symbol;Acc:HGNC:18404]	protein_coding,protein_coding_CDS_not_defined,retained_intron	11.4544	3.39279	0.856178	3.96272	7.41007e-05	0.000330447
ENSG00000177238	TRIM72	tripartite motif containing 72 [Source:HGNC Symbol;Acc:HGNC:32671]	protein_coding	15.5951	2.77125	0.657004	4.21801	2.46467e-05	0.000117652
ENSG00000177452		ribosomal protein L19 (RPL19) pseudogene	processed_pseudogene	6.32779	6.11016	1.44727	4.22184	2.42314e-05	0.000115814
ENSG00000177462	OR2T8	olfactory receptor family 2 subfamily T member 8 [Source:HGNC Symbol;Acc:HGNC:15020]	protein_coding	12.9108	-2.33547	0.704877	-3.3133	0.000922035	0.00341807
ENSG00000177464	GPR4	G protein-coupled receptor 4 [Source:HGNC Symbol;Acc:HGNC:4497]	protein_coding,protein_coding_CDS_not_defined	160.345	1.58266	0.186939	8.46618	2.53566e-17	3.02744e-16
ENSG00000177483	RBM44	RNA binding motif protein 44 [Source:HGNC Symbol;Acc:HGNC:24756]	protein_coding,protein_coding_CDS_not_defined,retained_intron	19.0745	-5.82739	1.12429	-5.18319	2.18128e-07	1.31483e-06
ENSG00000177494	ZBED2	zinc finger BED-type containing 2 [Source:HGNC Symbol;Acc:HGNC:20710]	protein_coding	59.4446	2.76633	0.347694	7.95622	1.77376e-15	1.91033e-14
ENSG00000177570	SAMD12	sterile alpha motif domain containing 12 [Source:HGNC Symbol;Acc:HGNC:31750]	nonsense_mediated_decay,protein_coding,protein_coding_CDS_not_defined	628.161	-2.3327	0.104551	-22.3116	2.84804e-110	2.3655e-108
ENSG00000177614	PGBD5	piggyBac transposable element derived 5 [Source:HGNC Symbol;Acc:HGNC:19405]	protein_coding,protein_coding_CDS_not_defined	201.517	-4.54864	0.257324	-17.6767	6.34114e-70	3.05224e-68
ENSG00000177721	ANXA2R	annexin A2 receptor [Source:HGNC Symbol;Acc:HGNC:33463]	protein_coding	7.66633	5.3934	1.39782	3.85844	0.000114111	0.000494445
ENSG00000177725		novel transcript, sense overlapping BMP1	lncRNA	78.2284	4.57403	0.40265	11.3598	6.62945e-30	1.32225e-28
ENSG00000178055	PRSS42P	serine protease 42, pseudogene [Source:HGNC Symbol;Acc:HGNC:30716]	processed_transcript,transcribed_unitary_pseudogene	20.0235	2.16401	0.617489	3.50453	0.000457416	0.00179427
ENSG00000178127	NDUFV2	NADH:ubiquinone oxidoreductase core subunit V2 [Source:HGNC Symbol;Acc:HGNC:7717]	nonsense_mediated_decay,protein_coding,protein_coding_CDS_not_defined,retained_intron	264.718	2.40796	0.163774	14.703	6.16851e-49	2.01217e-47
ENSG00000178184	PARD6G	par-6 family cell polarity regulator gamma [Source:HGNC Symbol;Acc:HGNC:16076]	protein_coding	1832.93	-1.97134	0.0634635	-31.0626	7.70714e-212	1.68263e-209
ENSG00000178395	CCDC185	coiled-coil domain containing 185 [Source:HGNC Symbol;Acc:HGNC:26654]	protein_coding	2.13291	4.54444	1.8415	2.46779	0.0135949	0.0388054
ENSG00000178404	CEP295NL	CEP295 N-terminal like [Source:HGNC Symbol;Acc:HGNC:44659]	protein_coding,retained_intron	298.442	1.93212	0.160143	12.065	1.6172e-33	3.63186e-32
ENSG00000178425	NT5DC1	5'-nucleotidase domain containing 1 [Source:HGNC Symbol;Acc:HGNC:21556]	nonsense_mediated_decay,protein_coding,retained_intron	872.607	-2.21778	0.0876008	-25.3169	2.07873e-141	2.42505e-139
ENSG00000178538	CA8	carbonic anhydrase 8 [Source:HGNC Symbol;Acc:HGNC:1382]	protein_coding,protein_coding_CDS_not_defined,retained_intron	176.154	-2.84706	0.213645	-13.3261	1.63271e-40	4.42408e-39
ENSG00000178631	ACTG1P1	actin gamma 1 pseudogene 1 [Source:HGNC Symbol;Acc:HGNC:146]	processed_pseudogene	10.7403	2.14136	0.773721	2.76761	0.00564689	0.0178159
ENSG00000178662	CSRNP3	cysteine and serine rich nuclear protein 3 [Source:HGNC Symbol;Acc:HGNC:30729]	protein_coding,protein_coding_CDS_not_defined	96.5193	-2.20718	0.262293	-8.41493	3.93127e-17	4.64473e-16
ENSG00000178726	THBD	thrombomodulin [Source:HGNC Symbol;Acc:HGNC:11784]	protein_coding	12.6156	2.02706	0.702982	2.88352	0.00393258	0.0128707
ENSG00000178764	ZHX2	zinc fingers and homeoboxes 2 [Source:HGNC Symbol;Acc:HGNC:18513]	protein_coding	584.353	-2.51032	0.108245	-23.191	5.61188e-119	5.08983e-117
ENSG00000178795	GDPD4	glycerophosphodiester phosphodiesterase domain containing 4 [Source:HGNC Symbol;Acc:HGNC:24849]	protein_coding,protein_coding_CDS_not_defined,retained_intron	10.6256	1.97212	0.719857	2.7396	0.00615143	0.0192366
ENSG00000179104	TMTC2	transmembrane O-mannosyltransferase targeting cadherins 2 [Source:HGNC Symbol;Acc:HGNC:25440]	nonsense_mediated_decay,protein_coding,retained_intron	220.244	-2.3566	0.177784	-13.2554	4.19754e-40	1.12938e-38
ENSG00000179242	CDH4	cadherin 4 [Source:HGNC Symbol;Acc:HGNC:1763]	protein_coding	1682.55	-3.94012	0.0812861	-48.4722	0	0
ENSG00000179399	GPC5	glypican 5 [Source:HGNC Symbol;Acc:HGNC:4453]	protein_coding,protein_coding_CDS_not_defined	87.7568	-4.16445	0.348754	-11.9409	7.24127e-33	1.58545e-31
ENSG00000179403	VWA1	von Willebrand factor A domain containing 1 [Source:HGNC Symbol;Acc:HGNC:30910]	protein_coding	14.1816	1.80834	0.624618	2.89511	0.00379023	0.0124582
ENSG00000179674	ARL14	ADP ribosylation factor like GTPase 14 [Source:HGNC Symbol;Acc:HGNC:22974]	protein_coding	139.884	2.15235	0.21843	9.85374	6.60418e-23	1.02622e-21
ENSG00000179695	OR6C2	olfactory receptor family 6 subfamily C member 2 [Source:HGNC Symbol;Acc:HGNC:15436]	protein_coding	4.14565	3.51816	1.42978	2.46064	0.0138691	0.0395252
ENSG00000179796	LRRC3B	leucine rich repeat containing 3B [Source:HGNC Symbol;Acc:HGNC:28105]	nonsense_mediated_decay,protein_coding,protein_coding_CDS_not_defined	2.31809	-4.66764	1.81257	-2.57515	0.0100197	0.0296612
ENSG00000179912	R3HDM2	R3H domain containing 2 [Source:HGNC Symbol;Acc:HGNC:29167]	protein_coding,protein_coding_CDS_not_defined,retained_intron	492.791	-2.30591	0.115097	-20.0344	2.76094e-89	1.74355e-87
ENSG00000179913	B3GNT3	UDP-GlcNAc:betaGal beta-1,3-N-acetylglucosaminyltransferase 3 [Source:HGNC Symbol;Acc:HGNC:13528]	protein_coding	437.55	1.5756	0.11588	13.5968	4.18398e-42	1.1841e-40
ENSG00000180139	ACTA2-AS1	ACTA2 antisense RNA 1 [Source:HGNC Symbol;Acc:HGNC:45169]	lncRNA	26.3108	3.15456	0.534944	5.897	3.70171e-09	2.64044e-08
ENSG00000180219	GARIN6	golgi associated RAB2 interactor family member 6 [Source:HGNC Symbol;Acc:HGNC:28594]	protein_coding	2.62449	4.84357	1.78014	2.72089	0.00651066	0.0202708
ENSG00000180287	PLD5	phospholipase D family member 5 [Source:HGNC Symbol;Acc:HGNC:26879]	nonsense_mediated_decay,protein_coding,protein_coding_CDS_not_defined	515.38	-1.81095	0.105838	-17.1106	1.23689e-65	5.50298e-64
ENSG00000180347	ITPRID1	ITPR interacting domain containing 1 [Source:HGNC Symbol;Acc:HGNC:27363]	protein_coding,protein_coding_CDS_not_defined,retained_intron	53.4748	-1.70811	0.324613	-5.262	1.425e-07	8.78436e-07
ENSG00000180610	ZBTB12BP	zinc finger and BTB domain containing 12B, pseudogene [Source:HGNC Symbol;Acc:HGNC:37702]	processed_pseudogene	13.2258	2.10964	0.661074	3.19122	0.00141672	0.00507585
ENSG00000180613	GSX2	GS homeobox 2 [Source:HGNC Symbol;Acc:HGNC:24959]	protein_coding,protein_coding_CDS_not_defined	20.0377	1.53921	0.556898	2.7639	0.00571147	0.0179989
ENSG00000180730	SHISA2	shisa family member 2 [Source:HGNC Symbol;Acc:HGNC:20366]	protein_coding	174.557	-2.00705	0.210025	-9.55627	1.22074e-21	1.7904e-20
ENSG00000180846	CSNK1G2-AS1	CSNK1G2 antisense RNA 1 [Source:HGNC Symbol;Acc:HGNC:28604]	lncRNA	43.7308	3.45793	0.432176	8.00122	1.23196e-15	1.3405e-14
ENSG00000180875	GREM2	gremlin 2, DAN family BMP antagonist [Source:HGNC Symbol;Acc:HGNC:17655]	protein_coding	20.7091	-1.86969	0.527048	-3.54747	0.000388943	0.0015445
ENSG00000180914	OXTR	oxytocin receptor [Source:HGNC Symbol;Acc:HGNC:8529]	protein_coding,retained_intron	83.7108	-1.78206	0.257063	-6.93237	4.13847e-12	3.63797e-11
ENSG00000180953	ST20	suppressor of tumorigenicity 20 [Source:HGNC Symbol;Acc:HGNC:33520]	lncRNA	12.5827	2.27471	0.681055	3.33999	0.000837819	0.00313247
ENSG00000180999	C1orf105	chromosome 1 open reading frame 105 [Source:HGNC Symbol;Acc:HGNC:29591]	protein_coding,protein_coding_CDS_not_defined	2.33436	4.67128	1.83796	2.54155	0.0110361	0.0323318
ENSG00000181031	RPH3AL	rabphilin 3A like (without C2 domains) [Source:HGNC Symbol;Acc:HGNC:10296]	protein_coding,protein_coding_CDS_not_defined,retained_intron	184.051	-1.65885	0.170219	-9.74534	1.93128e-22	2.93534e-21
ENSG00000181234	TMEM132C	transmembrane protein 132C [Source:HGNC Symbol;Acc:HGNC:25436]	protein_coding	5.94094	-3.00152	1.1548	-2.59916	0.00934523	0.0279297
ENSG00000181333	HEPHL1	hephaestin like 1 [Source:HGNC Symbol;Acc:HGNC:30477]	protein_coding	323.321	1.81216	0.136829	13.2439	4.89148e-40	1.31032e-38
ENSG00000181408	UTS2R	urotensin 2 receptor [Source:HGNC Symbol;Acc:HGNC:4468]	protein_coding	24.1741	2.07363	0.50173	4.13296	3.58124e-05	0.000166581
ENSG00000181449	SOX2	SRY-box transcription factor 2 [Source:HGNC Symbol;Acc:HGNC:11195]	protein_coding	564.283	-2.81853	0.133515	-21.1103	6.40239e-99	4.56152e-97
ENSG00000181458	TMEM45A	transmembrane protein 45A [Source:HGNC Symbol;Acc:HGNC:25480]	protein_coding,protein_coding_CDS_not_defined,retained_intron	2157.42	-1.93792	0.0585834	-33.0796	5.83851e-240	1.6678e-237
ENSG00000181577	C6orf223	chromosome 6 open reading frame 223 [Source:HGNC Symbol;Acc:HGNC:28692]	lncRNA	18.4267	2.2749	0.600128	3.7907	0.000150223	0.000638339
ENSG00000181634	TNFSF15	TNF superfamily member 15 [Source:HGNC Symbol;Acc:HGNC:11931]	protein_coding	374.011	2.27648	0.132674	17.1584	5.43833e-66	2.44445e-64
ENSG00000181652	ATG9B	autophagy related 9B [Source:HGNC Symbol;Acc:HGNC:21899]	nonsense_mediated_decay,protein_coding,protein_coding_CDS_not_defined,retained_intron	23.3938	2.28612	0.516206	4.4287	9.48019e-06	4.76112e-05
ENSG00000181804	SLC9A9	solute carrier family 9 member A9 [Source:HGNC Symbol;Acc:HGNC:20653]	nonsense_mediated_decay,protein_coding,protein_coding_CDS_not_defined	36.5451	-1.81965	0.405138	-4.49144	7.07434e-06	3.60559e-05
ENSG00000181908	LINC02724	long intergenic non-protein coding RNA 2724 [Source:HGNC Symbol;Acc:HGNC:54241]	lncRNA	19.9307	1.85981	0.54979	3.38277	0.000717592	0.00271753
ENSG00000182050	MGAT4C	MGAT4 family member C [Source:HGNC Symbol;Acc:HGNC:30871]	protein_coding,protein_coding_CDS_not_defined	29.9979	-2.71243	0.461685	-5.87508	4.22652e-09	3.00078e-08
ENSG00000182132	KCNIP1	potassium voltage-gated channel interacting protein 1 [Source:HGNC Symbol;Acc:HGNC:15521]	nonsense_mediated_decay,protein_coding,protein_coding_CDS_not_defined	142.521	-2.52014	0.225157	-11.1928	4.42087e-29	8.60115e-28
ENSG00000182168	UNC5C	unc-5 netrin receptor C [Source:HGNC Symbol;Acc:HGNC:12569]	protein_coding	329.574	-3.4041	0.159295	-21.3698	2.55362e-101	1.88986e-99
ENSG00000182179	UBA7	ubiquitin like modifier activating enzyme 7 [Source:HGNC Symbol;Acc:HGNC:12471]	protein_coding,protein_coding_CDS_not_defined,retained_intron	233.153	1.70532	0.164883	10.3426	4.52126e-25	7.60134e-24
ENSG00000182185	RAD51B	RAD51 paralog B [Source:HGNC Symbol;Acc:HGNC:9822]	nonsense_mediated_decay,protein_coding,protein_coding_CDS_not_defined,retained_intron	383.285	-2.09443	0.123017	-17.0255	5.31159e-65	2.34608e-63
ENSG00000182240	BACE2	beta-secretase 2 [Source:HGNC Symbol;Acc:HGNC:934]	protein_coding,protein_coding_CDS_not_defined,retained_intron	1501.11	-2.53954	0.0715671	-35.4847	8.45258e-276	3.11269e-273
ENSG00000182247	UBE2E2	ubiquitin conjugating enzyme E2 E2 [Source:HGNC Symbol;Acc:HGNC:12478]	nonsense_mediated_decay,protein_coding,protein_coding_CDS_not_defined	1308.86	-2.06919	0.0693373	-29.8424	1.10206e-195	2.15926e-193
ENSG00000182255	KCNA4	potassium voltage-gated channel subfamily A member 4 [Source:HGNC Symbol;Acc:HGNC:6222]	protein_coding,protein_coding_CDS_not_defined	32.4838	-1.67414	0.431907	-3.87616	0.000106118	0.000462036
ENSG00000182256	GABRG3	gamma-aminobutyric acid type A receptor subunit gamma3 [Source:HGNC Symbol;Acc:HGNC:4088]	protein_coding,protein_coding_CDS_not_defined,retained_intron	125.72	-1.89646	0.2201	-8.61637	6.91123e-18	8.47339e-17
ENSG00000182263	FIGN	fidgetin, microtubule severing factor [Source:HGNC Symbol;Acc:HGNC:13285]	protein_coding,protein_coding_CDS_not_defined	1055.62	-2.25892	0.0971896	-23.2425	1.69591e-119	1.55196e-117
ENSG00000182376		novel transcript, antisense to FAM38A	lncRNA	8.65244	2.46947	0.926841	2.6644	0.0077126	0.0235195
ENSG00000182389	CACNB4	calcium voltage-gated channel auxiliary subunit beta 4 [Source:HGNC Symbol;Acc:HGNC:1404]	nonsense_mediated_decay,protein_coding,protein_coding_CDS_not_defined,retained_intron	338.396	-2.14795	0.138999	-15.4529	7.20995e-54	2.6018e-52
ENSG00000182463	TSHZ2	teashirt zinc finger homeobox 2 [Source:HGNC Symbol;Acc:HGNC:13010]	nonsense_mediated_decay,protein_coding	499.247	-2.13561	0.114117	-18.7143	3.78862e-78	2.03872e-76
ENSG00000182472	CAPN12	calpain 12 [Source:HGNC Symbol;Acc:HGNC:13249]	nonsense_mediated_decay,protein_coding,retained_intron	34.6114	1.86436	0.411704	4.52839	5.94339e-06	3.05464e-05
ENSG00000182545	RNASE10	ribonuclease A family member 10 (inactive) [Source:HGNC Symbol;Acc:HGNC:19275]	protein_coding	35.953	1.89219	0.407775	4.64027	3.47947e-06	1.83901e-05
ENSG00000182621	PLCB1	phospholipase C beta 1 [Source:HGNC Symbol;Acc:HGNC:15917]	nonsense_mediated_decay,protein_coding,protein_coding_CDS_not_defined,retained_intron	691.397	-4.01333	0.127794	-31.4047	1.74321e-216	3.9762e-214
ENSG00000182667	NTM	neurotrimin [Source:HGNC Symbol;Acc:HGNC:17941]	protein_coding,protein_coding_CDS_not_defined,retained_intron	4687	-4.40065	0.0629643	-69.8913	0	0
ENSG00000182732	RGS6	regulator of G protein signaling 6 [Source:HGNC Symbol;Acc:HGNC:10002]	nonsense_mediated_decay,protein_coding,protein_coding_CDS_not_defined,retained_intron	23.3616	-1.54814	0.473436	-3.27001	0.00107543	0.00393893
ENSG00000182752	PAPPA	pappalysin 1 [Source:HGNC Symbol;Acc:HGNC:8602]	protein_coding,protein_coding_CDS_not_defined	807.637	1.55899	0.0885154	17.6126	1.97161e-69	9.4307e-68
ENSG00000182771	GRID1	glutamate ionotropic receptor delta type subunit 1 [Source:HGNC Symbol;Acc:HGNC:4575]	nonsense_mediated_decay,protein_coding,protein_coding_CDS_not_defined	534.398	-2.31002	0.121477	-19.0161	1.25461e-80	7.01047e-79
ENSG00000182901	RGS7	regulator of G protein signaling 7 [Source:HGNC Symbol;Acc:HGNC:10003]	nonsense_mediated_decay,protein_coding,protein_coding_CDS_not_defined,retained_intron	111.584	-2.4756	0.252394	-9.80846	1.03542e-22	1.59433e-21
ENSG00000182950	ODF3L1	outer dense fiber of sperm tails 3 like 1 [Source:HGNC Symbol;Acc:HGNC:28735]	protein_coding	4.95705	3.80557	1.36389	2.79022	0.00526715	0.0167506
ENSG00000182985	CADM1	cell adhesion molecule 1 [Source:HGNC Symbol;Acc:HGNC:5951]	nonsense_mediated_decay,protein_coding,protein_coding_CDS_not_defined,retained_intron	3466.85	-2.71635	0.0546332	-49.7197	0	0
ENSG00000183032	SLC25A21	solute carrier family 25 member 21 [Source:HGNC Symbol;Acc:HGNC:14411]	protein_coding,protein_coding_CDS_not_defined,retained_intron	47.9062	-4.1938	0.487203	-8.60789	7.44152e-18	9.11258e-17
ENSG00000183044	ABAT	4-aminobutyrate aminotransferase [Source:HGNC Symbol;Acc:HGNC:23]	nonsense_mediated_decay,protein_coding,protein_coding_CDS_not_defined,retained_intron	1000.81	-2.36141	0.0818733	-28.8423	6.3371e-183	1.05843e-180
ENSG00000183049	CAMK1D	calcium/calmodulin dependent protein kinase ID [Source:HGNC Symbol;Acc:HGNC:19341]	protein_coding,retained_intron	732.352	-3.28659	0.109158	-30.1084	3.75901e-199	7.60889e-197
ENSG00000183098	GPC6	glypican 6 [Source:HGNC Symbol;Acc:HGNC:4454]	protein_coding	2201.95	-5.10156	0.0909572	-56.0875	0	0
ENSG00000183128	CALHM3	calcium homeostasis modulator 3 [Source:HGNC Symbol;Acc:HGNC:23458]	protein_coding	37.8022	4.60507	0.590902	7.79329	6.52853e-15	6.83138e-14
ENSG00000183166	CALN1	calneuron 1 [Source:HGNC Symbol;Acc:HGNC:13248]	protein_coding	1206.52	-3.24585	0.0971072	-33.4254	5.86007e-245	1.73896e-242
ENSG00000183230	CTNNA3	catenin alpha 3 [Source:HGNC Symbol;Acc:HGNC:2511]	nonsense_mediated_decay,protein_coding,protein_coding_CDS_not_defined,retained_intron	23.8513	-3.11131	0.55734	-5.58242	2.37189e-08	1.57567e-07
ENSG00000183287	CCBE1	collagen and calcium binding EGF domains 1 [Source:HGNC Symbol;Acc:HGNC:29426]	nonsense_mediated_decay,protein_coding,protein_coding_CDS_not_defined,retained_intron	1098.87	-1.97464	0.0827623	-23.8591	8.14344e-126	7.92689e-124
ENSG00000183396	TMEM89	transmembrane protein 89 [Source:HGNC Symbol;Acc:HGNC:32372]	protein_coding	11.223	1.94208	0.699644	2.77581	0.00550638	0.0174208
ENSG00000183484	GPR132	G protein-coupled receptor 132 [Source:HGNC Symbol;Acc:HGNC:17482]	nonsense_mediated_decay,protein_coding,protein_coding_CDS_not_defined	30.4844	2.5994	0.491699	5.28657	1.24631e-07	7.72529e-07
ENSG00000183486	MX2	MX dynamin like GTPase 2 [Source:HGNC Symbol;Acc:HGNC:7533]	nonsense_mediated_decay,protein_coding,protein_coding_CDS_not_defined,retained_intron	58.1219	1.73548	0.33203	5.22689	1.72385e-07	1.0519e-06
ENSG00000183562		novel transcript, antisense to NAP1L4	lncRNA	21.312	1.53003	0.548121	2.79141	0.00524793	0.016693
ENSG00000183580	FBXL7	F-box and leucine rich repeat protein 7 [Source:HGNC Symbol;Acc:HGNC:13604]	protein_coding	529.458	-2.87222	0.123383	-23.2789	7.25839e-120	6.66225e-118
ENSG00000183621	ZNF438	zinc finger protein 438 [Source:HGNC Symbol;Acc:HGNC:21029]	nonsense_mediated_decay,protein_coding	345.455	-1.52269	0.130338	-11.6826	1.56427e-31	3.27255e-30
ENSG00000183722	LHFPL6	LHFPL tetraspan subfamily member 6 [Source:HGNC Symbol;Acc:HGNC:6586]	nonsense_mediated_decay,protein_coding,protein_coding_CDS_not_defined	587.463	-3.07202	0.126959	-24.197	2.39534e-129	2.42429e-127
ENSG00000183770	FOXL2	forkhead box L2 [Source:HGNC Symbol;Acc:HGNC:1092]	protein_coding	2.78874	4.93122	1.72222	2.86329	0.00419268	0.0136271
ENSG00000183780	SLC35F3	solute carrier family 35 member F3 [Source:HGNC Symbol;Acc:HGNC:23616]	protein_coding	183.076	-5.06934	0.296675	-17.0872	1.84923e-65	8.21536e-64
ENSG00000183960	KCNH8	potassium voltage-gated channel subfamily H member 8 [Source:HGNC Symbol;Acc:HGNC:18864]	nonsense_mediated_decay,protein_coding,protein_coding_CDS_not_defined	55.8555	-2.39599	0.339054	-7.0667	1.5866e-12	1.43943e-11
ENSG00000184005	ST6GALNAC3	ST6 N-acetylgalactosaminide alpha-2,6-sialyltransferase 3 [Source:HGNC Symbol;Acc:HGNC:19343]	protein_coding,protein_coding_CDS_not_defined	42.9458	-3.29795	0.432064	-7.63302	2.29321e-14	2.32709e-13
ENSG00000184084		ATP synthase, H+ transporting, mitochondrial F0 complex, subunit F6 (ATP5J) pseudogene	processed_pseudogene	19.4365	2.7722	0.615839	4.5015	6.74757e-06	3.44882e-05
ENSG00000184156	KCNQ3	potassium voltage-gated channel subfamily Q member 3 [Source:HGNC Symbol;Acc:HGNC:6297]	nonsense_mediated_decay,protein_coding,retained_intron	430.968	-2.18435	0.122811	-17.7863	9.02728e-71	4.40062e-69
ENSG00000184178	SCFD2	sec1 family domain containing 2 [Source:HGNC Symbol;Acc:HGNC:30676]	protein_coding	547.827	-2.09813	0.107006	-19.6076	1.33256e-85	8.03345e-84
ENSG00000184220	CMSS1	cms1 ribosomal small subunit homolog [Source:HGNC Symbol;Acc:HGNC:28666]	nonsense_mediated_decay,protein_coding,protein_coding_CDS_not_defined,retained_intron	2749.54	-2.76681	0.0567431	-48.7603	0	0
ENSG00000184221	OLIG1	oligodendrocyte transcription factor 1 [Source:HGNC Symbol;Acc:HGNC:16983]	protein_coding,protein_coding_CDS_not_defined	51.5403	1.86397	0.326152	5.71502	1.09689e-08	7.51037e-08
ENSG00000184304	PRKD1	protein kinase D1 [Source:HGNC Symbol;Acc:HGNC:9407]	nonsense_mediated_decay,protein_coding,protein_coding_CDS_not_defined,retained_intron	547.658	-4.61561	0.156962	-29.4059	4.61247e-190	8.29296e-188
ENSG00000184349	EFNA5	ephrin A5 [Source:HGNC Symbol;Acc:HGNC:3225]	protein_coding,protein_coding_CDS_not_defined,retained_intron	320.891	-1.58006	0.132224	-11.9498	6.50644e-33	1.42866e-31
ENSG00000184368	MAP7D2	MAP7 domain containing 2 [Source:HGNC Symbol;Acc:HGNC:25899]	protein_coding,protein_coding_CDS_not_defined	82.1529	2.05596	0.283979	7.23984	4.49217e-13	4.23514e-12
ENSG00000184384	MAML2	mastermind like transcriptional coactivator 2 [Source:HGNC Symbol;Acc:HGNC:16259]	protein_coding	791.971	-3.10709	0.104885	-29.6237	7.39839e-193	1.39588e-190
ENSG00000184434	LRRC19	leucine rich repeat containing 19 [Source:HGNC Symbol;Acc:HGNC:23379]	protein_coding,protein_coding_CDS_not_defined	31.6216	2.15105	0.434508	4.95055	7.40053e-07	4.21774e-06
ENSG00000184489	PTP4A3	protein tyrosine phosphatase 4A3 [Source:HGNC Symbol;Acc:HGNC:9636]	protein_coding	572.935	-1.70987	0.111485	-15.3372	4.31241e-53	1.53623e-51
ENSG00000184507	NUTM1	NUT midline carcinoma family member 1 [Source:HGNC Symbol;Acc:HGNC:29919]	protein_coding	21.2242	2.6116	0.559115	4.67095	2.99811e-06	1.59702e-05
ENSG00000184524	CEND1	cell cycle exit and neuronal differentiation 1 [Source:HGNC Symbol;Acc:HGNC:24153]	protein_coding,protein_coding_CDS_not_defined	8.12167	2.35567	0.891588	2.64211	0.00823911	0.0249651
ENSG00000184584	STING1	stimulator of interferon response cGAMP interactor 1 [Source:HGNC Symbol;Acc:HGNC:27962]	nonsense_mediated_decay,protein_coding,protein_coding_CDS_not_defined,retained_intron	588.599	1.63861	0.104296	15.7111	1.27023e-55	4.7232e-54
ENSG00000184611	KCNH7	potassium voltage-gated channel subfamily H member 7 [Source:HGNC Symbol;Acc:HGNC:18863]	protein_coding,protein_coding_CDS_not_defined	16.8897	-1.7086	0.564254	-3.02807	0.00246121	0.00841936
ENSG00000184640	SEPTIN9	septin 9 [Source:HGNC Symbol;Acc:HGNC:7323]	nonsense_mediated_decay,protein_coding,protein_coding_CDS_not_defined,retained_intron	9296.24	-1.50783	0.0383236	-39.3446	0	0
ENSG00000184828	ZBTB7C	zinc finger and BTB domain containing 7C [Source:HGNC Symbol;Acc:HGNC:31700]	protein_coding	32.7983	-1.81002	0.411821	-4.39517	1.10689e-05	5.51657e-05
ENSG00000184838	PRR16	proline rich 16 [Source:HGNC Symbol;Acc:HGNC:29654]	protein_coding	1699.48	-2.9064	0.166619	-17.4434	3.86674e-68	1.80163e-66
ENSG00000184845	DRD1	dopamine receptor D1 [Source:HGNC Symbol;Acc:HGNC:3020]	protein_coding	1308.47	-1.62643	0.0744635	-21.842	9.25802e-106	7.31192e-104
ENSG00000184856	LINC00308	long intergenic non-protein coding RNA 308 [Source:HGNC Symbol;Acc:HGNC:16023]	lncRNA	16.2753	-3.3119	0.708984	-4.67133	2.99253e-06	1.59433e-05
ENSG00000184903	IMMP2L	inner mitochondrial membrane peptidase subunit 2 [Source:HGNC Symbol;Acc:HGNC:14598]	protein_coding,protein_coding_CDS_not_defined	203.75	-3.29502	0.205092	-16.0661	4.4132e-58	1.72935e-56
ENSG00000184984	CHRM5	cholinergic receptor muscarinic 5 [Source:HGNC Symbol;Acc:HGNC:1954]	protein_coding	12.4005	1.88108	0.687174	2.73742	0.00619232	0.0193566
ENSG00000184985	SORCS2	sortilin related VPS10 domain containing receptor 2 [Source:HGNC Symbol;Acc:HGNC:16698]	protein_coding,protein_coding_CDS_not_defined	205.179	-3.39227	0.202595	-16.7441	6.25618e-63	2.67441e-61
ENSG00000185008	ROBO2	roundabout guidance receptor 2 [Source:HGNC Symbol;Acc:HGNC:10250]	nonsense_mediated_decay,protein_coding,retained_intron	35.3501	-6.13334	1.60482	-3.82182	0.00013247	0.000568435
ENSG00000185052	SLC24A3	solute carrier family 24 member 3 [Source:HGNC Symbol;Acc:HGNC:10977]	protein_coding	42.6842	-3.7314	0.478869	-7.79212	6.58918e-15	6.89248e-14
ENSG00000185070	FLRT2	fibronectin leucine rich transmembrane protein 2 [Source:HGNC Symbol;Acc:HGNC:3761]	protein_coding,protein_coding_CDS_not_defined,retained_intron	1418.7	-2.89903	0.0838555	-34.5717	6.72211e-262	2.25782e-259
ENSG00000185104	FAF1	Fas associated factor 1 [Source:HGNC Symbol;Acc:HGNC:3578]	nonsense_mediated_decay,protein_coding,protein_coding_CDS_not_defined	2043.15	-3.10026	0.0743431	-41.702	0	0
ENSG00000185168	LINC00482	long intergenic non-protein coding RNA 482 [Source:HGNC Symbol;Acc:HGNC:26816]	lncRNA	8.64	2.94153	0.898603	3.27345	0.00106243	0.00389647
ENSG00000185198	PRSS57	serine protease 57 [Source:HGNC Symbol;Acc:HGNC:31397]	protein_coding	8.42003	2.03146	0.820395	2.4762	0.013279	0.0380065
ENSG00000185250	PPIL6	peptidylprolyl isomerase like 6 [Source:HGNC Symbol;Acc:HGNC:21557]	nonsense_mediated_decay,protein_coding,protein_coding_CDS_not_defined	15.4544	2.37779	0.702073	3.38682	0.000707086	0.0026794
ENSG00000185274	GALNT17	polypeptide N-acetylgalactosaminyltransferase 17 [Source:HGNC Symbol;Acc:HGNC:16347]	protein_coding,protein_coding_CDS_not_defined	612.709	-2.43175	0.109211	-22.2666	7.78941e-110	6.40009e-108
ENSG00000185305	ARL15	ADP ribosylation factor like GTPase 15 [Source:HGNC Symbol;Acc:HGNC:25945]	protein_coding,protein_coding_CDS_not_defined,retained_intron	796.12	-3.90771	0.115293	-33.8937	8.24891e-252	2.59926e-249
ENSG00000185420	SMYD3	SET and MYND domain containing 3 [Source:HGNC Symbol;Acc:HGNC:15513]	protein_coding,protein_coding_CDS_not_defined,retained_intron	421.545	-1.80003	0.126822	-14.1934	1.00715e-45	3.06914e-44
ENSG00000185467	KPNA7	karyopherin subunit alpha 7 [Source:HGNC Symbol;Acc:HGNC:21839]	protein_coding	20.3336	3.84125	0.671273	5.72234	1.05069e-08	7.20698e-08
ENSG00000185483	ROR1	receptor tyrosine kinase like orphan receptor 1 [Source:HGNC Symbol;Acc:HGNC:10256]	protein_coding,protein_coding_CDS_not_defined	1358.33	-3.44629	0.084569	-40.7512	0	0
ENSG00000185527	PDE6G	phosphodiesterase 6G [Source:HGNC Symbol;Acc:HGNC:8789]	protein_coding,protein_coding_CDS_not_defined	29.9707	2.38909	0.46722	5.1134	3.16405e-07	1.87276e-06
ENSG00000185532	PRKG1	protein kinase cGMP-dependent 1 [Source:HGNC Symbol;Acc:HGNC:9414]	protein_coding,protein_coding_CDS_not_defined	376.37	-3.10247	0.151586	-20.4667	4.26136e-93	2.85007e-91
ENSG00000185633	NDUFA4L2	NDUFA4 mitochondrial complex associated like 2 [Source:HGNC Symbol;Acc:HGNC:29836]	protein_coding,protein_coding_CDS_not_defined,retained_intron	13.9493	-1.68931	0.703255	-2.40213	0.0163	0.0456153
ENSG00000185838	GNB1L	G protein subunit beta 1 like [Source:HGNC Symbol;Acc:HGNC:4397]	protein_coding,protein_coding_CDS_not_defined	209.968	-2.42865	0.176659	-13.7477	5.25749e-43	1.52174e-41
ENSG00000185924	RTN4RL1	reticulon 4 receptor like 1 [Source:HGNC Symbol;Acc:HGNC:21329]	protein_coding	11.456	-2.93578	0.783816	-3.74549	0.000180042	0.000754868
ENSG00000186073	CDIN1	CDAN1 interacting nuclease 1 [Source:HGNC Symbol;Acc:HGNC:26929]	nonsense_mediated_decay,protein_coding,protein_coding_CDS_not_defined,retained_intron	287.66	-1.60611	0.151937	-10.5709	4.06593e-26	7.11364e-25
ENSG00000186105	LRRC70	leucine rich repeat containing 70 [Source:HGNC Symbol;Acc:HGNC:35155]	protein_coding,protein_coding_CDS_not_defined	13.3766	4.69679	1.00402	4.678	2.89685e-06	1.54659e-05
ENSG00000186115	CYP4F2	cytochrome P450 family 4 subfamily F member 2 [Source:HGNC Symbol;Acc:HGNC:2645]	nonsense_mediated_decay,protein_coding,retained_intron	10.7325	2.45162	0.822744	2.97981	0.00288431	0.00972626
ENSG00000186469	GNG2	G protein subunit gamma 2 [Source:HGNC Symbol;Acc:HGNC:4404]	nonsense_mediated_decay,protein_coding,protein_coding_CDS_not_defined,retained_intron	173.742	-1.77203	0.185935	-9.53041	1.56662e-21	2.28453e-20
ENSG00000186479	RGS7BP	regulator of G protein signaling 7 binding protein [Source:HGNC Symbol;Acc:HGNC:23271]	protein_coding,protein_coding_CDS_not_defined,retained_intron	47.8468	1.87145	0.355684	5.26155	1.42845e-07	8.80077e-07
ENSG00000186510	CLCNKA	chloride voltage-gated channel Ka [Source:HGNC Symbol;Acc:HGNC:2026]	protein_coding,protein_coding_CDS_not_defined	20.1087	1.61256	0.5972	2.70019	0.00692989	0.0214146
ENSG00000186766	FOXI2	forkhead box I2 [Source:HGNC Symbol;Acc:HGNC:32448]	protein_coding	4.44507	4.58695	1.51119	3.03533	0.00240273	0.00824422
ENSG00000186832	KRT16	keratin 16 [Source:HGNC Symbol;Acc:HGNC:6423]	protein_coding,retained_intron	165.368	1.88057	0.199295	9.43612	3.86839e-21	5.54584e-20
ENSG00000186847	KRT14	keratin 14 [Source:HGNC Symbol;Acc:HGNC:6416]	protein_coding,retained_intron	439.595	-1.82103	0.115494	-15.7673	5.22649e-56	1.9601e-54
ENSG00000186868	MAPT	microtubule associated protein tau [Source:HGNC Symbol;Acc:HGNC:6893]	nonsense_mediated_decay,protein_coding,protein_coding_CDS_not_defined,retained_intron	58.9663	-1.61076	0.324333	-4.96636	6.82196e-07	3.90255e-06
ENSG00000187037	GPR141	G protein-coupled receptor 141 [Source:HGNC Symbol;Acc:HGNC:19997]	protein_coding,protein_coding_CDS_not_defined	16.5813	-3.33604	0.711586	-4.68817	2.75657e-06	1.47608e-05
ENSG00000187123	LYPD6	LY6/PLAUR domain containing 6 [Source:HGNC Symbol;Acc:HGNC:28751]	nonsense_mediated_decay,protein_coding	599.279	-3.21064	0.263295	-12.194	3.34393e-34	7.65598e-33
ENSG00000187210	GCNT1	glucosaminyl (N-acetyl) transferase 1 [Source:HGNC Symbol;Acc:HGNC:4203]	protein_coding,protein_coding_CDS_not_defined	1025.61	-1.75634	0.0835841	-21.0128	5.00603e-98	3.54188e-96
ENSG00000187323	DCC	DCC netrin 1 receptor [Source:HGNC Symbol;Acc:HGNC:2701]	nonsense_mediated_decay,protein_coding,protein_coding_CDS_not_defined,retained_intron	30.3635	-2.08015	0.44995	-4.62308	3.7809e-06	1.99144e-05
ENSG00000187479	C11orf96	chromosome 11 open reading frame 96 [Source:HGNC Symbol;Acc:HGNC:38675]	protein_coding	165.57	-1.67284	0.231463	-7.22727	4.92816e-13	4.6319e-12
ENSG00000187492	CDHR4	cadherin related family member 4 [Source:HGNC Symbol;Acc:HGNC:34527]	nonsense_mediated_decay,protein_coding,protein_coding_CDS_not_defined	33.3843	2.95605	0.489054	6.04443	1.49938e-09	1.10938e-08
ENSG00000187516	H2AP	H2A.P histone [Source:HGNC Symbol;Acc:HGNC:18417]	protein_coding	6.105	6.06039	1.44543	4.19278	2.75556e-05	0.000130439
ENSG00000187546	AGMO	alkylglycerol monooxygenase [Source:HGNC Symbol;Acc:HGNC:33784]	protein_coding,protein_coding_CDS_not_defined	20.8717	-1.94969	0.509328	-3.82795	0.000129214	0.000555551
ENSG00000187642	PERM1	PPARGC1 and ESRR induced regulator, muscle 1 [Source:HGNC Symbol;Acc:HGNC:28208]	protein_coding,retained_intron	51.6271	2.00805	0.341151	5.8861	3.95426e-09	2.81336e-08
ENSG00000187699	C2orf88	chromosome 2 open reading frame 88 [Source:HGNC Symbol;Acc:HGNC:28191]	protein_coding,protein_coding_CDS_not_defined	18.8781	1.83213	0.609427	3.00631	0.00264439	0.00898962
ENSG00000187720	THSD4	thrombospondin type 1 domain containing 4 [Source:HGNC Symbol;Acc:HGNC:25835]	protein_coding,protein_coding_CDS_not_defined,retained_intron	299.778	1.64435	0.151405	10.8606	1.77577e-27	3.25985e-26
ENSG00000187721	GTF2IP3	general transcription factor IIi pseudogene 3 [Source:HGNC Symbol;Acc:HGNC:42640]	unprocessed_pseudogene	26.4761	-1.74683	0.497441	-3.51164	0.000445344	0.00175091
ENSG00000187848	P2RX2	purinergic receptor P2X 2 [Source:HGNC Symbol;Acc:HGNC:15459]	protein_coding	13.3514	3.39464	0.790861	4.29233	1.76804e-05	8.58873e-05
ENSG00000187951		novel transcript	lncRNA	388.782	-1.56517	0.125086	-12.5128	6.35814e-36	1.52421e-34
ENSG00000187959	CPSF4L	cleavage and polyadenylation specific factor 4 like [Source:HGNC Symbol;Acc:HGNC:33632]	protein_coding	4.14371	-5.50541	1.55358	-3.5437	0.000394549	0.00156555
ENSG00000188064	WNT7B	Wnt family member 7B [Source:HGNC Symbol;Acc:HGNC:12787]	protein_coding	216.563	2.19604	0.164764	13.3284	1.58217e-40	4.29859e-39
ENSG00000188153	COL4A5	collagen type IV alpha 5 chain [Source:HGNC Symbol;Acc:HGNC:2207]	nonsense_mediated_decay,protein_coding,protein_coding_CDS_not_defined,retained_intron	822.891	-1.82526	0.0894394	-20.4078	1.42498e-92	9.44781e-91
ENSG00000188176	SMTNL2	smoothelin like 2 [Source:HGNC Symbol;Acc:HGNC:24764]	protein_coding,retained_intron	11.0704	2.87717	0.774482	3.71496	0.000203232	0.000844337
ENSG00000188312	CENPP	centromere protein P [Source:HGNC Symbol;Acc:HGNC:32933]	protein_coding	240.629	-1.75198	0.151747	-11.5454	7.78659e-31	1.58983e-29
ENSG00000188487	INSC	INSC spindle orientation adaptor protein [Source:HGNC Symbol;Acc:HGNC:33116]	protein_coding,protein_coding_CDS_not_defined	21.4381	1.786	0.545175	3.27601	0.00105285	0.00386412
ENSG00000188641	DPYD	dihydropyrimidine dehydrogenase [Source:HGNC Symbol;Acc:HGNC:3012]	protein_coding,protein_coding_CDS_not_defined,retained_intron	300.51	-1.74048	0.142393	-12.2231	2.34081e-34	5.38352e-33
ENSG00000188681	TEKT4P2	tektin 4 pseudogene 2 [Source:HGNC Symbol;Acc:HGNC:40046]	transcribed_unprocessed_pseudogene	48.6952	-2.19473	0.360382	-6.09002	1.129e-09	8.43919e-09
ENSG00000188771	PLET1	placenta expressed transcript 1 [Source:HGNC Symbol;Acc:HGNC:30053]	protein_coding	5.59397	5.93488	1.4683	4.042	5.29979e-05	0.00024091
ENSG00000188779	SKOR1	SKI family transcriptional corepressor 1 [Source:HGNC Symbol;Acc:HGNC:21326]	protein_coding	14.4098	-3.12604	0.720851	-4.3366	1.44705e-05	7.1062e-05
ENSG00000188859	FAM78B	family with sequence similarity 78 member B [Source:HGNC Symbol;Acc:HGNC:13495]	nonsense_mediated_decay,protein_coding	254.136	-1.97989	0.15567	-12.7185	4.66674e-37	1.15778e-35
ENSG00000188996	HUS1B	HUS1 checkpoint clamp component B [Source:HGNC Symbol;Acc:HGNC:16485]	protein_coding	17.061	2.43937	0.600592	4.06161	4.87345e-05	0.000222689
ENSG00000189127	ANKRD34B	ankyrin repeat domain 34B [Source:HGNC Symbol;Acc:HGNC:33736]	protein_coding	84.431	1.87633	0.267277	7.02018	2.21585e-12	1.98731e-11
ENSG00000189143	CLDN4	claudin 4 [Source:HGNC Symbol;Acc:HGNC:2046]	protein_coding,protein_coding_CDS_not_defined	878.363	1.7501	0.0879549	19.8977	4.26101e-88	2.66335e-86
ENSG00000189229		novel transcript	lncRNA	124.914	-2.15024	0.228621	-9.40525	5.19067e-21	7.39641e-20
ENSG00000189252	SPANXN3	SPANX family member N3 [Source:HGNC Symbol;Acc:HGNC:33176]	protein_coding	67.2293	1.80664	0.316847	5.70195	1.18445e-08	8.08637e-08
ENSG00000189280	GJB5	gap junction protein beta 5 [Source:HGNC Symbol;Acc:HGNC:4287]	protein_coding	12.2239	2.09489	0.755583	2.77255	0.00556191	0.0175801
ENSG00000189319	FAM53B	family with sequence similarity 53 member B [Source:HGNC Symbol;Acc:HGNC:28968]	protein_coding	589.969	-2.00216	0.108259	-18.4941	2.30222e-76	1.21954e-74
ENSG00000189334	S100A14	S100 calcium binding protein A14 [Source:HGNC Symbol;Acc:HGNC:18901]	protein_coding,protein_coding_CDS_not_defined	16.0684	1.68368	0.580473	2.90052	0.00372539	0.0122688
ENSG00000189337	KAZN	kazrin, periplakin interacting protein [Source:HGNC Symbol;Acc:HGNC:29173]	protein_coding,retained_intron	486.971	-1.93561	0.11634	-16.6376	3.72158e-62	1.56897e-60
ENSG00000189433	GJB4	gap junction protein beta 4 [Source:HGNC Symbol;Acc:HGNC:4286]	protein_coding	3.96124	4.41291	1.55134	2.84458	0.00444702	0.0143743
ENSG00000196104	SPOCK3	SPARC (osteonectin), cwcv and kazal like domains proteoglycan 3 [Source:HGNC Symbol;Acc:HGNC:13565]	nonsense_mediated_decay,protein_coding	36.6446	-4.12424	0.530238	-7.77808	7.36307e-15	7.69672e-14
ENSG00000196132	MYT1	myelin transcription factor 1 [Source:HGNC Symbol;Acc:HGNC:7622]	protein_coding,protein_coding_CDS_not_defined	40.5373	-3.03407	0.892218	-3.40059	0.000672409	0.00255529
ENSG00000196167	COLCA1	colorectal cancer associated 1 [Source:HGNC Symbol;Acc:HGNC:33789]	lncRNA	11.0089	2.49819	0.78213	3.19408	0.00140277	0.00503352
ENSG00000196353	CPNE4	copine 4 [Source:HGNC Symbol;Acc:HGNC:2317]	protein_coding,protein_coding_CDS_not_defined,retained_intron	142.544	-2.89499	0.23044	-12.5629	3.37695e-36	8.1594e-35
ENSG00000196376	SLC35F1	solute carrier family 35 member F1 [Source:HGNC Symbol;Acc:HGNC:21483]	protein_coding	98.6849	-3.24502	0.284096	-11.4223	3.23597e-30	6.51564e-29
ENSG00000196405	EVL	Enah/Vasp-like [Source:HGNC Symbol;Acc:HGNC:20234]	nonsense_mediated_decay,protein_coding,protein_coding_CDS_not_defined,retained_intron	591.63	-1.69524	0.0986164	-17.1902	3.14439e-66	1.42383e-64
ENSG00000196431	CRYBA4	crystallin beta A4 [Source:HGNC Symbol;Acc:HGNC:2396]	protein_coding,protein_coding_CDS_not_defined	32.281	-2.70572	0.454496	-5.95322	2.62911e-09	1.90289e-08
ENSG00000196482	ESRRG	estrogen related receptor gamma [Source:HGNC Symbol;Acc:HGNC:3474]	protein_coding,protein_coding_CDS_not_defined	12.3133	-1.9795	0.742862	-2.66469	0.00770584	0.0235035
ENSG00000196503	ARL9	ADP ribosylation factor like GTPase 9 [Source:HGNC Symbol;Acc:HGNC:23592]	nonsense_mediated_decay,protein_coding	20.4517	2.45923	0.585099	4.20309	2.63297e-05	0.000124944
ENSG00000196549	MME	membrane metalloendopeptidase [Source:HGNC Symbol;Acc:HGNC:7154]	protein_coding,protein_coding_CDS_not_defined,retained_intron	12.6025	-2.90065	0.730143	-3.97272	7.10571e-05	0.000317756
ENSG00000196569	LAMA2	laminin subunit alpha 2 [Source:HGNC Symbol;Acc:HGNC:6482]	nonsense_mediated_decay,protein_coding,protein_coding_CDS_not_defined,retained_intron	640.555	-2.13996	0.099843	-21.4333	6.53898e-102	4.86287e-100
ENSG00000196811	CHRNG	cholinergic receptor nicotinic gamma subunit [Source:HGNC Symbol;Acc:HGNC:1967]	protein_coding,retained_intron	4.48349	5.61366	1.54301	3.63813	0.000274625	0.00111799
ENSG00000196814	MVB12B	multivesicular body subunit 12B [Source:HGNC Symbol;Acc:HGNC:23368]	protein_coding,protein_coding_CDS_not_defined,retained_intron	610.108	-1.91352	0.100083	-19.1193	1.74356e-81	9.90555e-80
ENSG00000196872	CRACDL	CRACD like [Source:HGNC Symbol;Acc:HGNC:33454]	protein_coding,protein_coding_CDS_not_defined	379.551	-3.11658	0.162731	-19.1518	9.35723e-82	5.32595e-80
ENSG00000196935	SRGAP1	SLIT-ROBO Rho GTPase activating protein 1 [Source:HGNC Symbol;Acc:HGNC:17382]	nonsense_mediated_decay,protein_coding,retained_intron	377.712	-1.71355	0.12978	-13.2034	8.38075e-40	2.23328e-38
ENSG00000196979	GPRACR	GPR107 adjacent cis regulating lncRNA [Source:HGNC Symbol;Acc:HGNC:53957]	lncRNA	113.506	2.11959	0.235294	9.00827	2.09341e-19	2.74378e-18
ENSG00000197181	PIWIL2	piwi like RNA-mediated gene silencing 2 [Source:HGNC Symbol;Acc:HGNC:17644]	protein_coding,retained_intron	68.4158	2.52582	0.306888	8.23044	1.86525e-16	2.13286e-15
ENSG00000197301	HMGA2-AS1	HMGA2 antisense RNA 1 [Source:HGNC Symbol;Acc:HGNC:53973]	lncRNA	70.4461	2.97412	0.33061	8.99587	2.34358e-19	3.0638e-18
ENSG00000197308	GATA3-AS1	GATA3 antisense RNA 1 [Source:HGNC Symbol;Acc:HGNC:33786]	lncRNA	6.4639	3.12954	1.07939	2.89935	0.00373941	0.0123057
ENSG00000197405	C5AR1	complement C5a receptor 1 [Source:HGNC Symbol;Acc:HGNC:1338]	protein_coding,protein_coding_CDS_not_defined	148.547	1.51815	0.198088	7.66402	1.80207e-14	1.84092e-13
ENSG00000197550		zinc finger pseudogene	unprocessed_pseudogene	3.48768	-5.25632	1.60791	-3.26904	0.00107912	0.00395152
ENSG00000197565	COL4A6	collagen type IV alpha 6 chain [Source:HGNC Symbol;Acc:HGNC:2208]	protein_coding,protein_coding_CDS_not_defined,retained_intron	35.5972	-3.74497	0.516376	-7.25241	4.0943e-13	3.87078e-12
ENSG00000197587	DMBX1	diencephalon/mesencephalon homeobox 1 [Source:HGNC Symbol;Acc:HGNC:19026]	protein_coding	5.81143	-2.96507	1.13084	-2.622	0.00874165	0.0263318
ENSG00000197599	CCDC154	coiled-coil domain containing 154 [Source:HGNC Symbol;Acc:HGNC:34454]	nonsense_mediated_decay,protein_coding,retained_intron	33.2629	1.62764	0.409174	3.97786	6.95384e-05	0.000311374
ENSG00000197993	KEL	Kell metallo-endopeptidase (Kell blood group) [Source:HGNC Symbol;Acc:HGNC:6308]	nonsense_mediated_decay,protein_coding,protein_coding_CDS_not_defined,retained_intron	6.29363	-2.72217	1.03569	-2.62836	0.00857984	0.0258789
ENSG00000198074	AKR1B10	aldo-keto reductase family 1 member B10 [Source:HGNC Symbol;Acc:HGNC:382]	protein_coding,protein_coding_CDS_not_defined	61.3194	2.04663	0.317544	6.44519	1.15458e-10	9.26236e-10
ENSG00000198092	TMPRSS11F	transmembrane serine protease 11F [Source:HGNC Symbol;Acc:HGNC:29994]	protein_coding	5.29276	3.27016	1.19559	2.73519	0.00623434	0.0194799
ENSG00000198125	MB	myoglobin [Source:HGNC Symbol;Acc:HGNC:6915]	protein_coding	81.0439	1.81702	0.259091	7.01307	2.33138e-12	2.08725e-11
ENSG00000198286	CARD11	caspase recruitment domain family member 11 [Source:HGNC Symbol;Acc:HGNC:16393]	protein_coding,retained_intron	523.901	-2.42059	0.125704	-19.2563	1.25091e-82	7.13323e-81
ENSG00000198520	ARMH1	armadillo like helical domain containing 1 [Source:HGNC Symbol;Acc:HGNC:34345]	nonsense_mediated_decay,protein_coding,protein_coding_CDS_not_defined,retained_intron	188.986	1.51205	0.179528	8.42238	3.68904e-17	4.36192e-16
ENSG00000198542	ITGBL1	integrin subunit beta like 1 [Source:HGNC Symbol;Acc:HGNC:6164]	protein_coding,retained_intron	745.576	-1.97028	0.0899393	-21.9068	2.23827e-106	1.78158e-104
ENSG00000198570	RD3	RD3 regulator of GUCY2D [Source:HGNC Symbol;Acc:HGNC:19689]	protein_coding,protein_coding_CDS_not_defined	101.291	3.75847	0.312584	12.0239	2.66179e-33	5.92122e-32
ENSG00000198732	SMOC1	SPARC related modular calcium binding 1 [Source:HGNC Symbol;Acc:HGNC:20318]	protein_coding,protein_coding_CDS_not_defined,retained_intron	1848.38	-2.0971	0.0772053	-27.1626	1.79585e-162	2.46144e-160
ENSG00000198754	OXCT2	3-oxoacid CoA-transferase 2 [Source:HGNC Symbol;Acc:HGNC:18606]	protein_coding	9.77204	1.96959	0.819486	2.40344	0.0162414	0.045479
ENSG00000198788	MUC2	mucin 2, oligomeric mucus/gel-forming [Source:HGNC Symbol;Acc:HGNC:7512]	protein_coding,protein_coding_CDS_not_defined	1.99985	4.44812	1.87852	2.36788	0.0178904	0.049419
ENSG00000198797	BRINP2	BMP/retinoic acid inducible neural specific 2 [Source:HGNC Symbol;Acc:HGNC:13746]	protein_coding,protein_coding_CDS_not_defined	42.3873	3.14319	0.434705	7.23063	4.80775e-13	4.5229e-12
ENSG00000198846	TOX	thymocyte selection associated high mobility group box [Source:HGNC Symbol;Acc:HGNC:18988]	protein_coding	179.064	-3.34685	0.211464	-15.8271	2.02444e-56	7.62032e-55
ENSG00000198857	HSD3BP5	hydroxy-delta-5-steroid dehydrogenase, 3 beta, pseudogene 5 [Source:HGNC Symbol;Acc:HGNC:5223]	transcribed_unprocessed_pseudogene	73.8637	1.55641	0.300458	5.18013	2.21726e-07	1.33512e-06
ENSG00000198873	GRK5	G protein-coupled receptor kinase 5 [Source:HGNC Symbol;Acc:HGNC:4544]	protein_coding,retained_intron	277.202	-2.8538	0.164879	-17.3084	4.06309e-67	1.87031e-65
ENSG00000198944	SOWAHA	sosondowah ankyrin repeat domain family member A [Source:HGNC Symbol;Acc:HGNC:27033]	protein_coding	12.4245	1.66364	0.660816	2.51756	0.0118172	0.0343599
ENSG00000198947	DMD	dystrophin [Source:HGNC Symbol;Acc:HGNC:2928]	nonsense_mediated_decay,protein_coding,protein_coding_CDS_not_defined,retained_intron	12.2704	-2.23622	0.704865	-3.17256	0.00151103	0.00539038
ENSG00000198959	TGM2	transglutaminase 2 [Source:HGNC Symbol;Acc:HGNC:11778]	protein_coding,retained_intron	5192.92	1.51223	0.0462474	32.6987	1.63211e-234	4.45405e-232
ENSG00000198963	RORB	RAR related orphan receptor B [Source:HGNC Symbol;Acc:HGNC:10259]	protein_coding	109.666	-3.17912	0.266111	-11.9466	6.76372e-33	1.48302e-31
ENSG00000199730	RN7SKP95	RN7SK pseudogene 95 [Source:HGNC Symbol;Acc:HGNC:45819]	misc_RNA	5.11951	5.8062	1.49469	3.88454	0.000102523	0.000447019
ENSG00000200026	U8	U8 small nucleolar RNA [Source:RFAM;Acc:RF00096]	snoRNA	4.82759	5.71977	1.50803	3.79287	0.000148919	0.000633147
ENSG00000200164	Y_RNA	Y RNA [Source:RFAM;Acc:RF00019]	misc_RNA	7.70037	4.47722	1.28267	3.49055	0.000482027	0.00188187
ENSG00000200651	Y_RNA	Y RNA [Source:RFAM;Acc:RF00019]	misc_RNA	5.14802	5.81311	1.52573	3.81006	0.000138934	0.000594086
ENSG00000201071	Y_RNA	Y RNA [Source:RFAM;Acc:RF00019]	misc_RNA	2.80523	4.9385	1.69064	2.92108	0.00348816	0.0115472
ENSG00000201302	SNORA65	small nucleolar RNA, H/ACA box 65 [Source:HGNC Symbol;Acc:HGNC:10222]	snoRNA	14.8681	2.20193	0.631673	3.48587	0.000490532	0.00191336
ENSG00000201496	RN7SKP275	RN7SK pseudogene 275 [Source:HGNC Symbol;Acc:HGNC:45999]	misc_RNA	3.15744	-5.11268	1.65259	-3.09374	0.00197648	0.00689232
ENSG00000201581	RN7SKP78	RN7SK pseudogene 78 [Source:HGNC Symbol;Acc:HGNC:45802]	misc_RNA	2.30827	4.65736	1.79381	2.59635	0.0094219	0.0281286
ENSG00000201643	SNORA14A	small nucleolar RNA, H/ACA box 14A [Source:HGNC Symbol;Acc:HGNC:32602]	snoRNA	5.15339	5.81427	1.48511	3.91504	9.03901e-05	0.000397579
ENSG00000201736	RNA5SP160	RNA, 5S ribosomal pseudogene 160 [Source:HGNC Symbol;Acc:HGNC:43060]	rRNA_pseudogene	20.6592	4.3053	0.73085	5.89082	3.84287e-09	2.73666e-08
ENSG00000202019	Y_RNA	Y RNA [Source:RFAM;Acc:RF00019]	misc_RNA	2.31786	4.66243	1.77875	2.62119	0.00876239	0.0263865
ENSG00000202058	RN7SKP80	RN7SK pseudogene 80 [Source:HGNC Symbol;Acc:HGNC:45804]	misc_RNA	34.0767	2.18435	0.592657	3.6857	0.000228079	0.000942057
ENSG00000202512	RN7SKP230	RN7SK pseudogene 230 [Source:HGNC Symbol;Acc:HGNC:45954]	misc_RNA	2.48901	4.76473	1.75485	2.71517	0.00662409	0.0205716
ENSG00000203280	KIAA1671-AS1	KIAA1671 antisense RNA 1 [Source:HGNC Symbol;Acc:HGNC:41238]	lncRNA	19.0775	2.63135	0.619104	4.25026	2.13525e-05	0.000102794
ENSG00000203666	EFCAB2	EF-hand calcium binding domain 2 [Source:HGNC Symbol;Acc:HGNC:28166]	protein_coding,protein_coding_CDS_not_defined,retained_intron	159.479	-1.66123	0.182898	-9.08287	1.05749e-19	1.40775e-18
ENSG00000203727	SAMD5	sterile alpha motif domain containing 5 [Source:HGNC Symbol;Acc:HGNC:21180]	protein_coding	112.663	-1.62299	0.2235	-7.26173	3.82181e-13	3.61988e-12
ENSG00000203734	ECT2L	epithelial cell transforming 2 like [Source:HGNC Symbol;Acc:HGNC:21118]	protein_coding,protein_coding_CDS_not_defined	8.42095	2.4249	0.893139	2.71503	0.00662705	0.0205787
ENSG00000203737	GPR52	G protein-coupled receptor 52 [Source:HGNC Symbol;Acc:HGNC:4508]	protein_coding	3.45716	4.2084	1.59639	2.6362	0.00838393	0.0253492
ENSG00000203783	PRR9	proline rich 9 [Source:HGNC Symbol;Acc:HGNC:32057]	protein_coding	21.9634	2.76294	0.547177	5.04944	4.43111e-07	2.58073e-06
ENSG00000203801	LINC00222	long intergenic non-protein coding RNA 222 [Source:HGNC Symbol;Acc:HGNC:21560]	lncRNA	3.31769	-4.14999	1.6113	-2.57555	0.0100081	0.0296298
ENSG00000203867	RBM20	RNA binding motif protein 20 [Source:HGNC Symbol;Acc:HGNC:27424]	protein_coding,protein_coding_CDS_not_defined,retained_intron	137.536	-1.79618	0.200373	-8.96418	3.12612e-19	4.06595e-18
ENSG00000203876	ADD3-AS1	ADD3 antisense RNA 1 [Source:HGNC Symbol;Acc:HGNC:48682]	lncRNA,retained_intron	11.4657	-3.14274	0.822607	-3.82046	0.000133201	0.000571248
ENSG00000204011	COL5A1-AS1	COL5A1 antisense RNA 1 [Source:HGNC Symbol;Acc:HGNC:31368]	lncRNA	226.658	1.734	0.16209	10.6978	1.0422e-26	1.86286e-25
ENSG00000204049		novel transcript, antisense to DLG5	lncRNA	4.63483	5.66219	1.50635	3.75888	0.000170673	0.000719039
ENSG00000204052	LRRC73	leucine rich repeat containing 73 [Source:HGNC Symbol;Acc:HGNC:21375]	protein_coding	97.0541	1.79197	0.249604	7.17926	7.00882e-13	6.51732e-12
ENSG00000204099	NEU4	neuraminidase 4 [Source:HGNC Symbol;Acc:HGNC:21328]	nonsense_mediated_decay,protein_coding,retained_intron	28.6952	2.31185	0.475267	4.86433	1.14848e-06	6.41977e-06
ENSG00000204217	BMPR2	bone morphogenetic protein receptor type 2 [Source:HGNC Symbol;Acc:HGNC:1078]	protein_coding,protein_coding_CDS_not_defined	5480.65	-2.65832	0.0561509	-47.3424	0	0
ENSG00000204262	COL5A2	collagen type V alpha 2 chain [Source:HGNC Symbol;Acc:HGNC:2210]	protein_coding,retained_intron	9952.72	-1.53969	0.0465479	-33.0775	6.27029e-240	1.77455e-237
ENSG00000204272	NBDY	negative regulator of P-body association [Source:HGNC Symbol;Acc:HGNC:50713]	nonsense_mediated_decay,protein_coding	1155.45	-1.68297	0.0759781	-22.1507	1.0262e-108	8.34198e-107
ENSG00000204283	LINC01973	long intergenic non-protein coding RNA 1973 [Source:HGNC Symbol;Acc:HGNC:52800]	lncRNA	4.4497	2.98943	1.26226	2.36831	0.0178694	0.0493742
ENSG00000204323	SMIM5	small integral membrane protein 5 [Source:HGNC Symbol;Acc:HGNC:40030]	protein_coding,protein_coding_CDS_not_defined	88.211	2.58278	0.286108	9.02727	1.76001e-19	2.31873e-18
ENSG00000204442	NALF1	NALCN channel auxiliary factor 1 [Source:HGNC Symbol;Acc:HGNC:33877]	protein_coding	424.752	-2.36767	0.12161	-19.4694	1.99559e-84	1.17751e-82
ENSG00000204464	TMEM51-AS2	TMEM51 antisense RNA 2 [Source:HGNC Symbol;Acc:HGNC:32332]	lncRNA	4.28652	5.55039	1.5317	3.62369	0.000290433	0.00117789
ENSG00000204577	LILRB3	leukocyte immunoglobulin like receptor B3 [Source:HGNC Symbol;Acc:HGNC:6607]	nonsense_mediated_decay,protein_coding,protein_coding_CDS_not_defined,retained_intron	81.2162	-2.64111	0.288553	-9.15294	5.54066e-20	7.48674e-19
ENSG00000204706	MAMDC2-AS1	MAMDC2 antisense RNA 1 [Source:HGNC Symbol;Acc:HGNC:48719]	lncRNA	12.6375	-1.9101	0.718021	-2.66022	0.00780889	0.0237764
ENSG00000204876		novel transcript	lncRNA	6.74226	2.53105	0.968757	2.61268	0.00898346	0.0269747
ENSG00000204882	GPR20	G protein-coupled receptor 20 [Source:HGNC Symbol;Acc:HGNC:4475]	protein_coding	62.1921	3.19352	0.360755	8.85235	8.56991e-19	1.09187e-17
ENSG00000204947	ZNF425	zinc finger protein 425 [Source:HGNC Symbol;Acc:HGNC:20690]	protein_coding,protein_coding_CDS_not_defined,retained_intron	71.1907	2.12826	0.308902	6.88974	5.58935e-12	4.86581e-11
ENSG00000204950	LRRC10B	leucine rich repeat containing 10B [Source:HGNC Symbol;Acc:HGNC:37215]	protein_coding	30.6361	1.67616	0.432578	3.87482	0.000106703	0.000464318
ENSG00000205090	TMEM240	transmembrane protein 240 [Source:HGNC Symbol;Acc:HGNC:25186]	protein_coding	33.1315	-1.75039	0.41605	-4.20716	2.58599e-05	0.000122867
ENSG00000205108	FAM205A	family with sequence similarity 205 member A [Source:HGNC Symbol;Acc:HGNC:41911]	protein_coding	18.8008	2.60419	0.597879	4.35572	1.32632e-05	6.5491e-05
ENSG00000205116	TMEM88B	transmembrane protein 88B [Source:HGNC Symbol;Acc:HGNC:37099]	protein_coding	3.6202	5.30707	1.59303	3.33143	0.000864016	0.00322293
ENSG00000205181	LINC00654	long intergenic non-protein coding RNA 654 [Source:HGNC Symbol;Acc:HGNC:27154]	lncRNA	7.1197	-2.13717	0.901502	-2.37068	0.0177554	0.0490905
ENSG00000205293	LINC01602	long intergenic non-protein coding RNA 1602 [Source:HGNC Symbol;Acc:HGNC:51634]	lncRNA	11.9255	2.18148	0.735446	2.9662	0.003015	0.010119
ENSG00000205312	KRT17P4	keratin 17 pseudogene 4 [Source:HGNC Symbol;Acc:HGNC:50722]	transcribed_unprocessed_pseudogene	2.82594	4.94755	1.72288	2.87167	0.00408308	0.0133162
ENSG00000205334	LINC01460	long intergenic non-protein coding RNA 1460 [Source:HGNC Symbol;Acc:HGNC:50858]	lncRNA	27.4516	1.6982	0.443576	3.82843	0.000128962	0.000554548
ENSG00000205414		novel transcript, antisense to NKD1	lncRNA	17.8928	7.61079	1.2721	5.98288	2.19229e-09	1.59846e-08
ENSG00000205420	KRT6A	keratin 6A [Source:HGNC Symbol;Acc:HGNC:6443]	protein_coding,retained_intron	28.3089	3.48415	0.540394	6.44742	1.13768e-10	9.13159e-10
ENSG00000205628	LINC01446	long intergenic non-protein coding RNA 1446 [Source:HGNC Symbol;Acc:HGNC:50773]	lncRNA	275.731	-2.08033	0.146623	-14.1883	1.0818e-45	3.29336e-44
ENSG00000205632	LINC01310	long intergenic non-protein coding RNA 1310 [Source:HGNC Symbol;Acc:HGNC:50501]	lncRNA	22.1938	-2.4336	0.523439	-4.64925	3.33148e-06	1.76476e-05
ENSG00000205693	MANSC4	MANSC domain containing 4 [Source:HGNC Symbol;Acc:HGNC:40023]	protein_coding	23.503	3.07691	0.569922	5.39883	6.70776e-08	4.28559e-07
ENSG00000205755	CRLF2	cytokine receptor like factor 2 [Source:HGNC Symbol;Acc:HGNC:14281]	nonsense_mediated_decay,protein_coding	44.3134	2.0503	0.364812	5.62015	1.90787e-08	1.27882e-07
ENSG00000205809	KLRC2	killer cell lectin like receptor C2 [Source:HGNC Symbol;Acc:HGNC:6375]	nonsense_mediated_decay,protein_coding	27.2101	2.40882	0.477989	5.03949	4.66777e-07	2.71288e-06
ENSG00000205810	KLRC3	killer cell lectin like receptor C3 [Source:HGNC Symbol;Acc:HGNC:6376]	protein_coding	3.17336	5.11406	1.72148	2.97073	0.00297095	0.00998117
ENSG00000205959		novel transcript	lncRNA	30.11	-2.18178	0.47094	-4.63281	3.6074e-06	1.90399e-05
ENSG00000205971		lncRNA radiation induced regulator of PLK1 and RAD51	lncRNA	11.1193	2.87579	0.887059	3.24194	0.0011872	0.00431676
ENSG00000206052	DOK6	docking protein 6 [Source:HGNC Symbol;Acc:HGNC:28301]	protein_coding,protein_coding_CDS_not_defined	158.32	-2.91265	0.224438	-12.9775	1.64088e-38	4.21812e-37
ENSG00000206190	ATP10A	ATPase phospholipid transporting 10A (putative) [Source:HGNC Symbol;Acc:HGNC:13542]	nonsense_mediated_decay,protein_coding,protein_coding_CDS_not_defined,retained_intron	10.1079	-3.84333	0.954858	-4.02503	5.69675e-05	0.00025769
ENSG00000206262	FOXL2NB	FOXL2 neighbor [Source:HGNC Symbol;Acc:HGNC:34428]	nonsense_mediated_decay,protein_coding,retained_intron	19.1134	1.64204	0.555912	2.95379	0.00313901	0.0105029
ENSG00000206448	PPIAP30	peptidylprolyl isomerase A pseudogene 30 [Source:HGNC Symbol;Acc:HGNC:44878]	processed_pseudogene	5.78883	3.41537	1.20073	2.84441	0.00444943	0.0143805
ENSG00000206561	COLQ	collagen like tail subunit of asymmetric acetylcholinesterase [Source:HGNC Symbol;Acc:HGNC:2226]	nonsense_mediated_decay,protein_coding,protein_coding_CDS_not_defined,retained_intron	33.7134	-3.11842	0.488422	-6.38467	1.71763e-10	1.36326e-09
ENSG00000206647			snoRNA	22.5202	1.94595	0.502466	3.8728	0.000107594	0.000467797
ENSG00000207003	RNU6-611P	RNA, U6 small nuclear 611, pseudogene [Source:HGNC Symbol;Acc:HGNC:47574]	snRNA	6.08881	5.05533	1.43378	3.52587	0.000422088	0.00166724
ENSG00000207181	SNORA14B	small nucleolar RNA, H/ACA box 14B [Source:HGNC Symbol;Acc:HGNC:32603]	snoRNA	18.0299	2.0671	0.597927	3.4571	0.000546014	0.00211039
ENSG00000207326	Y_RNA	Y RNA [Source:RFAM;Acc:RF00019]	misc_RNA	2.67819	4.86883	1.7896	2.72062	0.006516	0.0202796
ENSG00000207559	MIR578	microRNA 578 [Source:HGNC Symbol;Acc:HGNC:32834]	miRNA	14.5571	2.39286	0.698185	3.42726	0.000609695	0.00233672
ENSG00000211451	GNRHR2	gonadotropin releasing hormone receptor 2 (pseudogene) [Source:HGNC Symbol;Acc:HGNC:16341]	processed_transcript,transcribed_unitary_pseudogene	38.3042	-1.68354	0.375424	-4.48437	7.31283e-06	3.72218e-05
ENSG00000211659	IGLV3-25	immunoglobulin lambda variable 3-25 [Source:HGNC Symbol;Acc:HGNC:5908]	IG_V_gene	3.31779	5.17942	1.62459	3.18815	0.00143188	0.00512294
ENSG00000211714	TRBV7-3	T cell receptor beta variable 7-3 [Source:HGNC Symbol;Acc:HGNC:12237]	TR_V_gene	14.3236	2.50081	0.726117	3.44409	0.000572992	0.00220545
ENSG00000212124	TAS2R19	taste 2 receptor member 19 [Source:HGNC Symbol;Acc:HGNC:19108]	protein_coding	8.63604	-2.46474	0.842731	-2.9247	0.00344784	0.0114311
ENSG00000212125	TAS2R15P	taste 2 receptor member 15 pseudogene [Source:HGNC Symbol;Acc:HGNC:19106]	unprocessed_pseudogene	14.2507	-3.50548	0.775208	-4.52199	6.12603e-06	3.14376e-05
ENSG00000212127	TAS2R14	taste 2 receptor member 14 [Source:HGNC Symbol;Acc:HGNC:14920]	protein_coding,protein_coding_CDS_not_defined	33.1053	-5.01712	0.69971	-7.17029	7.48409e-13	6.94448e-12
ENSG00000212232	SNORD17	small nucleolar RNA, C/D box 17 [Source:HGNC Symbol;Acc:HGNC:32713]	snoRNA	296.728	1.75602	0.150176	11.6931	1.38274e-31	2.90471e-30
ENSG00000212724	KRTAP2-3	keratin associated protein 2-3 [Source:HGNC Symbol;Acc:HGNC:18906]	protein_coding	605.297	2.10633	0.107779	19.543	4.72924e-85	2.82323e-83
ENSG00000212901	KRTAP3-1	keratin associated protein 3-1 [Source:HGNC Symbol;Acc:HGNC:16778]	protein_coding,protein_coding_CDS_not_defined	5.96209	4.08819	1.31597	3.1066	0.00189252	0.00662923
ENSG00000212993	POU5F1B	POU class 5 homeobox 1B [Source:HGNC Symbol;Acc:HGNC:9223]	protein_coding	4.46644	-4.59842	1.51632	-3.03263	0.00242434	0.0083105
ENSG00000213045		cofilin 1 (non-muscle) (CFL1) pseudogene	processed_pseudogene	14.642	-3.13628	0.754776	-4.15524	3.24943e-05	0.000152073
ENSG00000213096	ZNF254	zinc finger protein 254 [Source:HGNC Symbol;Acc:HGNC:13047]	nonsense_mediated_decay,protein_coding,retained_intron	67.07	-4.80761	0.476602	-10.0873	6.28925e-24	1.0171e-22
ENSG00000213123	DYNLT2B	dynein light chain Tctex-type 2B [Source:HGNC Symbol;Acc:HGNC:28482]	nonsense_mediated_decay,protein_coding,protein_coding_CDS_not_defined,retained_intron	21.8546	2.09461	0.507238	4.12944	3.6365e-05	0.000169049
ENSG00000213137	ARF1P2	ADP ribosylation factor 1 pseudogene 2 [Source:HGNC Symbol;Acc:HGNC:39883]	processed_pseudogene	8.30003	6.50217	1.37488	4.72926	2.25336e-06	1.22096e-05
ENSG00000213145	CRIP1	cysteine rich protein 1 [Source:HGNC Symbol;Acc:HGNC:2360]	protein_coding,retained_intron	11.6412	2.13191	0.732241	2.91149	0.00359707	0.0118794
ENSG00000213170	SAR1AP2	secretion associated Ras related GTPase 1A pseudogene 2 [Source:HGNC Symbol;Acc:HGNC:20770]	processed_pseudogene	4.60843	4.64105	1.5031	3.08764	0.0020175	0.00702735
ENSG00000213412	HNRNPA1P33	heterogeneous nuclear ribonucleoprotein A1 pseudogene 33 [Source:HGNC Symbol;Acc:HGNC:44990]	processed_pseudogene	103.258	3.45568	0.283676	12.1818	3.88695e-34	8.87927e-33
ENSG00000213498	TPT1P13	TPT1 pseudogene 13 [Source:HGNC Symbol;Acc:HGNC:49304]	processed_pseudogene	5.46807	-4.90015	1.45595	-3.3656	0.000763771	0.00287779
ENSG00000213533	STIMATE	STIM activating enhancer [Source:HGNC Symbol;Acc:HGNC:30526]	nonsense_mediated_decay,protein_coding,protein_coding_CDS_not_defined	26.5267	-1.63415	0.454265	-3.59735	0.000321473	0.00129423
ENSG00000213592	PPIAP42	peptidylprolyl isomerase A pseudogene 42 [Source:HGNC Symbol;Acc:HGNC:53666]	processed_pseudogene	4.95884	3.80228	1.34222	2.83284	0.00461369	0.0148549
ENSG00000213779		ribosomal protein L29 (RPL29) pseudogene	processed_pseudogene	7.24057	2.64817	0.960594	2.7568	0.00583697	0.0183527
ENSG00000213938	SEPHS1P6	selenophosphate synthetase 1 pseudogene 6 [Source:HGNC Symbol;Acc:HGNC:42168]	processed_pseudogene	12.6087	-1.58679	0.636753	-2.492	0.0127026	0.036552
ENSG00000213962	API5P2	apoptosis inhibitor 5 pseudogene 2 [Source:HGNC Symbol;Acc:HGNC:39070]	processed_pseudogene	8.90183	2.13319	0.852958	2.50093	0.0123867	0.0357506
ENSG00000213981		novel transcript, antisense to MYO3B	lncRNA	14.0938	-2.757	0.713763	-3.86263	0.000112171	0.000486588
ENSG00000214049	UCA1	urothelial cancer associated 1 [Source:HGNC Symbol;Acc:HGNC:37126]	lncRNA	51.1585	2.01615	0.394877	5.10576	3.29459e-07	1.94625e-06
ENSG00000214140	PRCD	photoreceptor disc component [Source:HGNC Symbol;Acc:HGNC:32528]	protein_coding,protein_coding_CDS_not_defined,retained_intron	64.7309	2.04861	0.295035	6.94363	3.82142e-12	3.37285e-11
ENSG00000214146	LINC02026	long intergenic non-protein coding RNA 2026 [Source:HGNC Symbol;Acc:HGNC:52861]	lncRNA	26.2115	1.7605	0.487102	3.61423	0.00030124	0.00121839
ENSG00000214188	ST7-OT4	ST7 overlapping transcript 4 [Source:HGNC Symbol;Acc:HGNC:18835]	lncRNA	6.79173	2.54167	0.973285	2.61144	0.0090163	0.0270498
ENSG00000214279	SCART1	scavenger receptor family member expressed on T cells 1 [Source:HGNC Symbol;Acc:HGNC:32411]	protein_coding,retained_intron	127.014	-2.08891	0.214442	-9.74113	2.01307e-22	3.05661e-21
ENSG00000214376	VSTM5	V-set and transmembrane domain containing 5 [Source:HGNC Symbol;Acc:HGNC:34443]	nonsense_mediated_decay,protein_coding,retained_intron	6.3067	2.72506	1.01599	2.68217	0.00731463	0.0224515
ENSG00000214650		novel transcript	lncRNA	124.475	2.76964	0.258934	10.6963	1.0588e-26	1.89032e-25
ENSG00000214686	IQCF6	IQ motif containing F6 [Source:HGNC Symbol;Acc:HGNC:35158]	protein_coding	9.66269	3.7596	0.99924	3.76246	0.000168247	0.000709699
ENSG00000214846		ribosomal protein L10a (RPL10A) pseudogene	processed_pseudogene	2.83374	4.95096	1.72528	2.86966	0.00410908	0.0133931
ENSG00000214888		nuclear pore associated protein 1 (NPAP1) pseudogene	transcribed_unprocessed_pseudogene	42.6118	-5.38971	0.663014	-8.1291	4.32479e-16	4.85804e-15
ENSG00000214999		novel transcript, antisense to ALOX12B	lncRNA	18.305	1.5614	0.561993	2.77833	0.00546392	0.0173008
ENSG00000215089	KRT18P11	keratin 18 pseudogene 11 [Source:HGNC Symbol;Acc:HGNC:6431]	processed_pseudogene	9.93762	1.9999	0.758476	2.63673	0.00837097	0.0253125
ENSG00000215146		zinc finger protein pseudogene	transcribed_unprocessed_pseudogene	553.249	-1.97974	0.108733	-18.2074	4.51135e-74	2.28672e-72
ENSG00000215244	LINC02649	long intergenic non-protein coding RNA 2649 [Source:HGNC Symbol;Acc:HGNC:54134]	lncRNA	5.30958	-4.85585	1.46169	-3.32208	0.000893488	0.00332272
ENSG00000215283	HMGB3P24	high mobility group box 3 pseudogene 24 [Source:HGNC Symbol;Acc:HGNC:39316]	processed_pseudogene	17.0596	-2.67335	0.606972	-4.4044	1.06075e-05	5.29595e-05
ENSG00000215386	MIR99AHG	mir-99a-let-7c cluster host gene [Source:HGNC Symbol;Acc:HGNC:1274]	lncRNA	88.9094	-2.07954	0.259716	-8.00695	1.17592e-15	1.28181e-14
ENSG00000215458	AATBC	apoptosis associated transcript in bladder cancer [Source:HGNC Symbol;Acc:HGNC:51526]	lncRNA	136.144	2.08015	0.212368	9.79503	1.1826e-22	1.81639e-21
ENSG00000215807	KRT18P65	keratin 18 pseudogene 65 [Source:HGNC Symbol;Acc:HGNC:48892]	processed_pseudogene	12.237	2.3691	0.743944	3.18451	0.00144999	0.00518169
ENSG00000215861		phosphodiesterase 4D interacting protein (myomegalin) (PDE4DIP) pseudogene	transcribed_unprocessed_pseudogene	5.67282	2.91122	1.14406	2.54464	0.010939	0.0320873
ENSG00000216316		60S Ribosomal Protein L13A (RPL13) pseudogene	processed_pseudogene	10.9434	3.32661	0.921963	3.60818	0.000308354	0.00124601
ENSG00000216360		Glyceraldehyde 3-phosphate dehydrogenase (GAPDH) pseudogene	processed_pseudogene	2.81917	-4.94965	1.68675	-2.93443	0.00334157	0.0111137
ENSG00000216639	RPL7AP35	ribosomal protein L7a pseudogene 35 [Source:HGNC Symbol;Acc:HGNC:36113]	processed_pseudogene	3.50417	4.22512	1.60473	2.63292	0.00846552	0.0255756
ENSG00000216906		multimerin 2 (MMRN2) pseudogene	processed_pseudogene	29.6872	3.8003	0.582701	6.52186	6.94407e-11	5.64576e-10
ENSG00000216921	FAM240C	family with sequence similarity 240 member C [Source:HGNC Symbol;Acc:HGNC:54200]	protein_coding	1.97556	4.43315	1.87392	2.3657	0.0179959	0.0496834
ENSG00000217527	RPS16P5	ribosomal protein S16 pseudogene 5 [Source:HGNC Symbol;Acc:HGNC:36183]	transcribed_processed_pseudogene	2.67998	4.86949	1.75256	2.7785	0.00546113	0.0172938
ENSG00000218226	TATDN2P2	TatD DNase domain containing 2 pseudogene 2 [Source:HGNC Symbol;Acc:HGNC:39255]	processed_pseudogene	368.501	1.93349	0.128839	15.0071	6.59958e-51	2.24378e-49
ENSG00000218336	TENM3	teneurin transmembrane protein 3 [Source:HGNC Symbol;Acc:HGNC:29944]	protein_coding,protein_coding_CDS_not_defined,retained_intron	5343.57	-3.75282	0.12194	-30.776	5.49172e-208	1.17381e-205
ENSG00000218617		crumbs homolog 3 (Drosophila) (CRB3) pseudogene	processed_pseudogene	2.1269	4.54084	1.88634	2.40722	0.0160744	0.0450509
ENSG00000218819	TDRD15	tudor domain containing 15 [Source:HGNC Symbol;Acc:HGNC:45037]	protein_coding	217.059	2.33987	0.170017	13.7626	4.27782e-43	1.24407e-41
ENSG00000219039		THO complex 4 (THOC4) pseudogene	processed_pseudogene	13.5577	-1.54882	0.641699	-2.41363	0.0157946	0.0443756
ENSG00000219438	TAFA5	TAFA chemokine like family member 5 [Source:HGNC Symbol;Acc:HGNC:21592]	protein_coding,protein_coding_CDS_not_defined	2030.54	-3.43241	0.0776038	-44.2299	0	0
ENSG00000219565	ZPR1P1	ZPR1 pseudogene 1 [Source:HGNC Symbol;Acc:HGNC:13052]	processed_transcript,transcribed_processed_pseudogene	2.32077	-4.66907	1.8039	-2.58832	0.00964444	0.028706
ENSG00000219607	PPP1R3G	protein phosphatase 1 regulatory subunit 3G [Source:HGNC Symbol;Acc:HGNC:14945]	protein_coding	2.15982	-4.56488	1.82359	-2.50324	0.0123061	0.0355786
ENSG00000219881	GAPDHP42	glyceraldehyde 3 phosphate dehydrogenase pseudogene 42 [Source:HGNC Symbol;Acc:HGNC:37799]	processed_pseudogene	2.9806	5.02523	1.70343	2.95007	0.00317703	0.0106173
ENSG00000220305	HNRNPH1P1	heterogeneous nuclear ribonucleoprotein H1 pseudogene 1 [Source:HGNC Symbol;Acc:HGNC:48751]	processed_pseudogene	7.77751	3.87343	1.09922	3.52379	0.000425416	0.00167995
ENSG00000220494	YAP1P1	YAP1 pseudogene 1 [Source:HGNC Symbol;Acc:HGNC:38016]	processed_pseudogene	3.49047	5.25239	1.68511	3.11694	0.0018274	0.00641343
ENSG00000220685		transcription factor B2, mitochondrial (TFB2M) pseudogene	processed_pseudogene	12.2935	-7.07384	1.32149	-5.35294	8.65364e-08	5.45358e-07
ENSG00000220884	MESTP1	mesoderm specific transcript pseudogene 1 [Source:HGNC Symbol;Acc:HGNC:29660]	processed_pseudogene	6.44973	6.13913	1.42073	4.3211	1.55257e-05	7.59511e-05
ENSG00000220920		ribosomal protein S12 (RPS12) pseudogene	unprocessed_pseudogene	13.5538	2.84512	0.74104	3.83936	0.000123353	0.000532452
ENSG00000221039	MIR1286	microRNA 1286 [Source:HGNC Symbol;Acc:HGNC:35279]	miRNA	4.36467	3.60148	1.49322	2.41189	0.0158701	0.0445549
ENSG00000221634	MIR1276	microRNA 1276 [Source:HGNC Symbol;Acc:HGNC:35347]	miRNA	3.63011	4.28169	1.56861	2.72961	0.00634084	0.0197884
ENSG00000221760	MIR548J	microRNA 548j [Source:HGNC Symbol;Acc:HGNC:35276]	miRNA	4.49398	5.61649	1.52846	3.67461	0.000238216	0.000980615
ENSG00000221826	PSG3	pregnancy specific beta-1-glycoprotein 3 [Source:HGNC Symbol;Acc:HGNC:9520]	nonsense_mediated_decay,protein_coding,protein_coding_CDS_not_defined,retained_intron	22.8718	2.47809	0.527883	4.6944	2.6739e-06	1.43458e-05
ENSG00000221962	TMEM14EP	transmembrane protein 14E, pseudogene [Source:HGNC Symbol;Acc:HGNC:34386]	processed_transcript,transcribed_processed_pseudogene	2.50372	4.77202	1.776	2.68694	0.00721089	0.0221746
ENSG00000221963	APOL6	apolipoprotein L6 [Source:HGNC Symbol;Acc:HGNC:14870]	protein_coding	1061.45	1.52553	0.0767932	19.8655	8.10049e-88	5.02214e-86
ENSG00000222007		novel transcript, antisense to AGAP1	lncRNA	2.14671	4.55235	1.81755	2.50466	0.012257	0.0354668
ENSG00000223117	RN7SKP296	RN7SK pseudogene 296 [Source:HGNC Symbol;Acc:HGNC:46020]	misc_RNA	5.09911	3.2158	1.24992	2.5728	0.0100879	0.0298198
ENSG00000223382	LINC01778	long intergenic non-protein coding RNA 1778 [Source:HGNC Symbol;Acc:HGNC:52568]	lncRNA	58.7288	2.18104	0.365381	5.96923	2.3837e-09	1.72977e-08
ENSG00000223478	ZDHHC12-DT	ZDHHC12 divergent transcript [Source:HGNC Symbol;Acc:HGNC:55873]	lncRNA	372.508	-1.96865	0.129954	-15.1489	7.70469e-52	2.67303e-50
ENSG00000223552	CCR5AS	CCR5 antisense RNA [Source:HGNC Symbol;Acc:HGNC:54398]	lncRNA	5.80216	3.41564	1.17773	2.90019	0.00372941	0.0122794
ENSG00000223561	LINC03007	long intergenic non-protein coding RNA 3007 [Source:HGNC Symbol;Acc:HGNC:56132]	lncRNA	3.81848	-4.36237	1.56745	-2.78309	0.00538439	0.0170929
ENSG00000223564	CYP4F32P	cytochrome P450 family 4 subfamily F member 32, pseudogene [Source:HGNC Symbol;Acc:HGNC:39951]	transcribed_unprocessed_pseudogene	937.012	-1.59667	0.0823181	-19.3964	8.28169e-84	4.83996e-82
ENSG00000223572	CKMT1A	creatine kinase, mitochondrial 1A [Source:HGNC Symbol;Acc:HGNC:31736]	nonsense_mediated_decay,protein_coding,protein_coding_CDS_not_defined,retained_intron	22.5097	1.6415	0.501212	3.27505	0.00105643	0.00387634
ENSG00000223573	TINCR	TINCR ubiquitin domain containing [Source:HGNC Symbol;Acc:HGNC:14607]	protein_coding,protein_coding_CDS_not_defined,retained_intron	24.8745	-5.19304	0.825042	-6.29428	3.08839e-10	2.40501e-09
ENSG00000223581	LINC02665	long intergenic non-protein coding RNA 2665 [Source:HGNC Symbol;Acc:HGNC:54151]	lncRNA	13.7594	5.34044	1.16838	4.5708	4.85869e-06	2.52347e-05
ENSG00000223584	TVP23CP1	TVP23C pseudogene 1 [Source:HGNC Symbol;Acc:HGNC:44646]	processed_pseudogene	17.1902	7.55352	1.27351	5.93124	3.0065e-09	2.16424e-08
ENSG00000223599		adipose differentiation-related protein (ADFP) pseudogene	processed_pseudogene	28.7148	2.0326	0.454486	4.47231	7.73802e-06	3.93009e-05
ENSG00000223679		solute carrier family 5 (sodium/glucose cotransporter), member 1 (SLC5A1) pseudogene	unprocessed_pseudogene	7.56883	2.73088	0.999408	2.73249	0.00628567	0.0196263
ENSG00000223812	PYDC2-AS1	PYDC2 antisense RNA 1 [Source:HGNC Symbol;Acc:HGNC:52874]	lncRNA	70.765	-3.68173	0.352949	-10.4313	1.78356e-25	3.05917e-24
ENSG00000223842		novel transcript	lncRNA	18.1554	2.77192	0.614745	4.50906	6.51169e-06	3.33439e-05
ENSG00000223855	PDGFA-DT	PDGFA divergent transcript [Source:HGNC Symbol;Acc:HGNC:55865]	lncRNA	110.014	1.78813	0.250114	7.14926	8.72448e-13	8.07583e-12
ENSG00000223872		novel transcript	lncRNA	5.79194	-4.05396	1.33613	-3.0341	0.00241256	0.00827607
ENSG00000223923	TNS1-AS1	TNS1 antisense RNA 1 [Source:HGNC Symbol;Acc:HGNC:40589]	lncRNA	5.98438	4.09038	1.34053	3.05131	0.00227848	0.00784784
ENSG00000223956	LINC01767	long intergenic non-protein coding RNA 1767 [Source:HGNC Symbol;Acc:HGNC:52557]	lncRNA	3.9958	4.42335	1.55065	2.85258	0.0043366	0.014053
ENSG00000223965	ZNF587P1	zinc finger protein 587 pseudogene 1 [Source:HGNC Symbol;Acc:HGNC:42438]	processed_pseudogene	12.8839	7.13766	1.30412	5.47318	4.42036e-08	2.87037e-07
ENSG00000223985	LINC01874	long intergenic non-protein coding RNA 1874 [Source:HGNC Symbol;Acc:HGNC:52693]	lncRNA	7.62757	-2.48505	0.884702	-2.80891	0.00497098	0.0159047
ENSG00000223999		novel transcript	lncRNA	8.95065	5.62262	1.36023	4.13358	3.57155e-05	0.000166181
ENSG00000224023	EDRF1-DT	EDRF1 divergent transcript [Source:HGNC Symbol;Acc:HGNC:54128]	lncRNA	7.63578	2.47729	0.928714	2.66744	0.00764323	0.0233335
ENSG00000224027		novel transcript	lncRNA	9.91422	-2.33071	0.837586	-2.78266	0.00539159	0.0171126
ENSG00000224043	CCNT2-AS1	CCNT2 antisense RNA 1 [Source:HGNC Symbol;Acc:HGNC:40130]	lncRNA	96.2315	-1.7011	0.26988	-6.30319	2.91584e-10	2.27528e-09
ENSG00000224093	BCAR3-AS1	BCAR3 antisense RNA 1 [Source:HGNC Symbol;Acc:HGNC:40093]	lncRNA	60.7608	5.01436	0.514108	9.7535	1.78217e-22	2.71546e-21
ENSG00000224116	INHBA-AS1	INHBA antisense RNA 1 [Source:HGNC Symbol;Acc:HGNC:40303]	lncRNA	42.746	1.56542	0.384251	4.07396	4.62194e-05	0.000211958
ENSG00000224173	LINC02831	long intergenic non-protein coding RNA 2831 [Source:HGNC Symbol;Acc:HGNC:54365]	lncRNA	8.77762	-2.98325	0.910237	-3.27745	0.00104751	0.00384727
ENSG00000224231	LINC01832	long intergenic non-protein coding RNA 1832 [Source:HGNC Symbol;Acc:HGNC:52638]	lncRNA	4.32704	3.59303	1.42356	2.52398	0.0116035	0.0337885
ENSG00000224243	SOX1-OT	SOX1 overlapping transcript [Source:HGNC Symbol;Acc:HGNC:42733]	lncRNA	12.7609	-3.11452	0.750608	-4.14933	3.33452e-05	0.000155769
ENSG00000224259	LINC01133	long intergenic non-protein coding RNA 1133 [Source:HGNC Symbol;Acc:HGNC:49447]	lncRNA	5.93921	2.62956	1.06233	2.47528	0.0133131	0.0380936
ENSG00000224272		novel transcript	lncRNA	27.1835	2.15961	0.470113	4.59381	4.3522e-06	2.27199e-05
ENSG00000224315	RPL7P7	ribosomal protein L7 pseudogene 7 [Source:HGNC Symbol;Acc:HGNC:36895]	processed_pseudogene	2.4605	4.75057	1.78882	2.6557	0.00791448	0.0240631
ENSG00000224321	RPL12P14	ribosomal protein L12 pseudogene 14 [Source:HGNC Symbol;Acc:HGNC:36495]	processed_pseudogene	227.861	2.61302	0.173748	15.0392	4.06434e-51	1.39111e-49
ENSG00000224361		novel transcript, antisense to KLHL29	lncRNA	11.7698	3.43444	0.839182	4.0926	4.26564e-05	0.000196739
ENSG00000224549		novel transcript	lncRNA	11.9391	-5.13211	1.1699	-4.3868	1.15028e-05	5.72147e-05
ENSG00000224618		ectodermal-neural cortex (ENC1) pseudogene	processed_pseudogene	2.96858	5.02028	1.66544	3.01439	0.00257493	0.00877203
ENSG00000224635		novel transcript	lncRNA	27.7696	1.72344	0.469751	3.66885	0.000243644	0.00100148
ENSG00000224683	RPL36AP29	ribosomal protein L36a pseudogene 29 [Source:HGNC Symbol;Acc:HGNC:36897]	processed_pseudogene	5.95058	2.62426	1.05446	2.48873	0.0128199	0.0368513
ENSG00000224707	E2F3-IT1	E2F3 intronic transcript 1 [Source:HGNC Symbol;Acc:HGNC:41329]	lncRNA	3.79736	5.37526	1.5712	3.42111	0.000623659	0.00238545
ENSG00000224728	IMPDH1P8	inosine monophosphate dehydrogenase 1 pseudogene 8 [Source:HGNC Symbol;Acc:HGNC:33963]	processed_pseudogene	73.8342	2.3279	0.310411	7.4994	6.41086e-14	6.32295e-13
ENSG00000224769	MUC20P1	mucin 20, cell surface associated pseudogene 1 [Source:HGNC Symbol;Acc:HGNC:51921]	unprocessed_pseudogene	28.2761	2.1138	0.441889	4.78356	1.72217e-06	9.44011e-06
ENSG00000224786	CETN4P	centrin 4, pseudogene [Source:HGNC Symbol;Acc:HGNC:35450]	processed_transcript,retained_intron,transcribed_unitary_pseudogene	30.9151	-1.70537	0.446821	-3.81667	0.000135262	0.000579438
ENSG00000224792	IQCF4P	IQ motif containing F4, pseudogene [Source:HGNC Symbol;Acc:HGNC:54720]	processed_transcript,retained_intron,transcribed_unitary_pseudogene	2.66848	-4.86935	1.81466	-2.68333	0.00728921	0.0223824
ENSG00000224819		novel transcript	lncRNA	16.2304	-1.70359	0.593623	-2.86982	0.00410704	0.01339
ENSG00000224863	LINC01398	long intergenic non-protein coding RNA 1398 [Source:HGNC Symbol;Acc:HGNC:50678]	lncRNA,retained_intron	23.3187	2.86266	0.530569	5.39545	6.83517e-08	4.3597e-07
ENSG00000224885	EIPR1-IT1	EIPR1 intronic transcript 1 [Source:HGNC Symbol;Acc:HGNC:41392]	lncRNA	16.5835	4.5847	0.891527	5.14252	2.71072e-07	1.61728e-06
ENSG00000224973	LARGE-AS1	LARGE antisense RNA 1 [Source:HGNC Symbol;Acc:HGNC:40336]	lncRNA,retained_intron	10.811	5.8991	1.33555	4.41697	1.00093e-05	5.01285e-05
ENSG00000225026		Prefoldin subunit 1 (PFD1) pseudogene	processed_pseudogene	10.0727	2.02467	0.741173	2.7317	0.00630076	0.0196714
ENSG00000225028		novel transcript	lncRNA	23.2722	2.95781	0.626969	4.71764	2.38599e-06	1.28757e-05
ENSG00000225180	PVALEF	parvalbumin like EF-hand containing [Source:HGNC Symbol;Acc:HGNC:40053]	protein_coding,retained_intron	10.4917	2.5855	0.850635	3.03949	0.00236976	0.00813931
ENSG00000225187		novel transcript	lncRNA	9.13271	2.17234	0.84816	2.56124	0.01043	0.0307092
ENSG00000225213		novel transcript, sense intronic to RSU1	lncRNA	24.0003	1.81689	0.470201	3.86407	0.000111513	0.000484008
ENSG00000225217	HSPA7	heat shock protein family A (Hsp70) member 7 (pseudogene) [Source:HGNC Symbol;Acc:HGNC:5240]	unprocessed_pseudogene	11.5892	1.87054	0.674947	2.77138	0.00558191	0.0176369
ENSG00000225286		ribosomal protein S2 (RPS2) pseudogene	processed_pseudogene	2.62628	4.84452	1.74303	2.77936	0.00544653	0.0172565
ENSG00000225295	MTND4P4	MT-ND4 pseudogene 4 [Source:HGNC Symbol;Acc:HGNC:42191]	unprocessed_pseudogene	7.97956	2.11741	0.845759	2.50357	0.0122949	0.0355528
ENSG00000225334	LINC02813	long intergenic non-protein coding RNA 2813 [Source:HGNC Symbol;Acc:HGNC:54345]	lncRNA	9.95497	-3.46772	0.920159	-3.7686	0.000164164	0.000693334
ENSG00000225361	PPP1R26-AS1	PPP1R26 antisense RNA 1 [Source:HGNC Symbol;Acc:HGNC:48717]	lncRNA	341.917	1.64383	0.131966	12.4565	1.28967e-35	3.0676e-34
ENSG00000225385		proline-rich nuclear receptor coactivator 2 (PNRC2) pseudogene	processed_pseudogene	2.46472	4.75273	1.75959	2.70104	0.00691225	0.0213688
ENSG00000225506	CYP4A22-AS1	CYP4A22 antisense RNA 1 [Source:HGNC Symbol;Acc:HGNC:43715]	lncRNA	41.8614	-1.51031	0.356746	-4.23358	2.29998e-05	0.000110307
ENSG00000225595	LINC01623	long intergenic non-protein coding RNA 1623 [Source:HGNC Symbol;Acc:HGNC:52050]	lncRNA	23.3576	-1.66232	0.500632	-3.32044	0.000898772	0.00333994
ENSG00000225605		novel transcript	lncRNA	3.82197	4.35764	1.55917	2.79484	0.00519255	0.0165392
ENSG00000225614	ZNF469	zinc finger protein 469 [Source:HGNC Symbol;Acc:HGNC:23216]	protein_coding	373.754	-2.66063	0.145872	-18.2395	2.50843e-74	1.28641e-72
ENSG00000225643		novel transcript	lncRNA	5.301	-5.86086	1.49478	-3.92088	8.8227e-05	0.00038896
ENSG00000225711		UDP-Gal:betaGlcNAc beta 1,3-galactosyltransferase, polypeptide 3 (B3GALT3) pseudogene	processed_pseudogene	12.5485	7.09969	1.3076	5.42957	5.64888e-08	3.63109e-07
ENSG00000225778	PROSER2-AS1	PROSER2 antisense RNA 1 [Source:HGNC Symbol;Acc:HGNC:27343]	lncRNA	42.8706	3.15938	0.434238	7.27571	3.44615e-13	3.27304e-12
ENSG00000225889		novel transcript, antisense to PELI1	lncRNA	66.4335	-1.91973	0.291906	-6.57654	4.81528e-11	3.95217e-10
ENSG00000225932	ENSG00000225932	ENSG00000225932	ENSG00000225932	2.49116	-4.77087	1.7541	-2.71984	0.00653129	0.0203226
ENSG00000225968	ELFN1	extracellular leucine rich repeat and fibronectin type III domain containing 1 [Source:HGNC Symbol;Acc:HGNC:33154]	protein_coding,retained_intron	2327.46	-1.66186	0.0608754	-27.2994	4.30846e-164	6.01315e-162
ENSG00000225978	HAR1A	highly accelerated region 1A [Source:HGNC Symbol;Acc:HGNC:33117]	lncRNA	28.599	2.2508	0.474497	4.74355	2.1001e-06	1.14257e-05
ENSG00000225980	OR7E19P	olfactory receptor family 7 subfamily E member 19 pseudogene [Source:HGNC Symbol;Acc:HGNC:8390]	transcribed_unprocessed_pseudogene	8.47577	-3.56347	1.09978	-3.24017	0.00119459	0.00434159
ENSG00000225981	MICALL2-DT	MICALL2 divergent transcript [Source:HGNC Symbol;Acc:HGNC:56050]	lncRNA	12.7581	2.04721	0.670591	3.05284	0.00226687	0.00781315
ENSG00000226025		Charcot-Leyden crystal protein pseudogene	transcribed_unprocessed_pseudogene	3.46096	4.20941	1.58722	2.65206	0.00800023	0.0242972
ENSG00000226045		glutamyl-tRNA(Gln) amidotransferase, subunit C homolog (bacterial)(GATC) pseudogene	processed_pseudogene	1.97735	4.43427	1.86529	2.37726	0.0174419	0.0483461
ENSG00000226057	PHF2P2	PHD finger protein 2 pseudogene 2 [Source:HGNC Symbol;Acc:HGNC:38808]	transcribed_unprocessed_pseudogene	594.971	-1.68654	0.0979018	-17.2269	1.66946e-66	7.58202e-65
ENSG00000226067	LINC00623	long intergenic non-protein coding RNA 623 [Source:HGNC Symbol;Acc:HGNC:44252]	lncRNA	145.025	-2.68681	0.217586	-12.3483	4.97524e-35	1.16349e-33
ENSG00000226125	LINC01907	long intergenic non-protein coding RNA 1907 [Source:HGNC Symbol;Acc:HGNC:52726]	lncRNA	21.0424	2.24832	0.571197	3.93615	8.2799e-05	0.000366722
ENSG00000226145	KRT16P6	keratin 16 pseudogene 6 [Source:HGNC Symbol;Acc:HGNC:50719]	transcribed_unprocessed_pseudogene	9.43692	-5.70603	1.35017	-4.22616	2.37716e-05	0.000113795
ENSG00000226181		novel transcript	lncRNA	16.3371	3.14623	0.69438	4.53099	5.87081e-06	3.01887e-05
ENSG00000226314	ZKSCAN8P1	ZKSCAN8 pseudogene 1 [Source:HGNC Symbol;Acc:HGNC:18777]	protein_coding,retained_intron	47.3673	-1.80301	0.344629	-5.23174	1.67917e-07	1.02607e-06
ENSG00000226416	MRPL23-AS1	MRPL23 antisense RNA 1 [Source:HGNC Symbol;Acc:HGNC:42812]	lncRNA	10.1013	-6.79116	1.34412	-5.05248	4.36111e-07	2.54335e-06
ENSG00000226520	KIRREL1-IT1	KIRREL1 intronic transcript 1 [Source:HGNC Symbol;Acc:HGNC:41412]	lncRNA	15.1523	4.44991	0.916907	4.85318	1.21498e-06	6.76923e-06
ENSG00000226539	MLXP1	MLX pseudogene 1 [Source:HGNC Symbol;Acc:HGNC:54600]	processed_pseudogene	5.316	2.81218	1.13444	2.4789	0.0131787	0.0377761
ENSG00000226571		novel transcript	lncRNA	7.43862	2.69652	0.931721	2.89413	0.0038021	0.0124945
ENSG00000226604	PAPPA-AS2	PAPPA antisense RNA 2 [Source:HGNC Symbol;Acc:HGNC:35160]	lncRNA	8.82648	2.49992	0.877842	2.8478	0.00440221	0.014246
ENSG00000226652	PSMD10P2	proteasome 26S subunit, non-ATPase, 10 pseudogene 2 [Source:HGNC Symbol;Acc:HGNC:30151]	processed_transcript,transcribed_processed_pseudogene	18.9661	3.09605	0.646636	4.78793	1.68509e-06	9.24515e-06
ENSG00000226726	TMEM256P2	transmembrane protein 256 pseudogene 2 [Source:HGNC Symbol;Acc:HGNC:45088]	processed_pseudogene	2.13559	4.54591	1.8798	2.41829	0.0155937	0.0438919
ENSG00000226746	SMCR5	Smith-Magenis syndrome chromosome region, candidate 5 [Source:HGNC Symbol;Acc:HGNC:17918]	lncRNA	5.97351	2.63256	1.02939	2.55739	0.010546	0.0310209
ENSG00000226942	IL9RP3	interleukin 9 receptor pseudogene 3 [Source:HGNC Symbol;Acc:HGNC:6033]	unprocessed_pseudogene	52.1506	1.96907	0.337369	5.83655	5.32932e-09	3.74633e-08
ENSG00000226981	ABHD17AP6	ABHD17A pseudogene 6 [Source:HGNC Symbol;Acc:HGNC:34044]	unprocessed_pseudogene	24.3916	-1.73548	0.471711	-3.67911	0.000234048	0.000965146
ENSG00000227038	GTF2IP7	general transcription factor IIi pseudogene 7 [Source:HGNC Symbol;Acc:HGNC:51720]	transcribed_unprocessed_pseudogene	13.7941	2.07007	0.668445	3.09685	0.00195587	0.00682667
ENSG00000227076		novel transcript	lncRNA	151.011	2.342	0.224177	10.4471	1.51076e-25	2.59564e-24
ENSG00000227107		novel transcript	lncRNA	19.3711	1.80312	0.524444	3.43815	0.000585701	0.00225239
ENSG00000227110	LMCD1-AS1	LMCD1 antisense RNA 1 [Source:HGNC Symbol;Acc:HGNC:44477]	lncRNA	44.4105	-2.06048	0.36016	-5.72101	1.05895e-08	7.26037e-08
ENSG00000227158		ligand of numb-protein X 1, E3 ubiquitin protein ligase pseudogene	processed_pseudogene	39.4469	2.48936	0.406855	6.11856	9.44257e-10	7.10204e-09
ENSG00000227170	TRPS1-AS1	TRPS1 antisense RNA 1 [Source:HGNC Symbol;Acc:HGNC:56224]	lncRNA	5.7852	5.98238	1.45164	4.12113	3.77021e-05	0.000175052
ENSG00000227200		novel transcript	lncRNA	15.1896	2.59396	0.655497	3.95723	7.58226e-05	0.000337535
ENSG00000227218		novel transcript	lncRNA	17.6213	1.78136	0.596637	2.98567	0.0028296	0.00955865
ENSG00000227245		novel transcript	lncRNA	5.11882	3.85366	1.33737	2.88153	0.00395752	0.0129393
ENSG00000227308	LINC02832	long intergenic non-protein coding RNA 2832 [Source:HGNC Symbol;Acc:HGNC:54366]	lncRNA	126.938	2.04966	0.2219	9.2369	2.53741e-20	3.4841e-19
ENSG00000227331	RPL7AP22	ribosomal protein L7a pseudogene 22 [Source:HGNC Symbol;Acc:HGNC:36592]	processed_pseudogene	32.1792	2.69375	0.448281	6.00906	1.86599e-09	1.36838e-08
ENSG00000227456	LINC00310	long intergenic non-protein coding RNA 310 [Source:HGNC Symbol;Acc:HGNC:16414]	lncRNA	13.0924	-3.89054	0.842291	-4.61899	3.8561e-06	2.02895e-05
ENSG00000227477	STK4-DT	STK4 divergent transcript [Source:HGNC Symbol;Acc:HGNC:43811]	lncRNA	16.4613	-1.55515	0.645962	-2.4075	0.0160621	0.0450279
ENSG00000227512		novel transcript	lncRNA	14.5153	7.30998	1.29317	5.65275	1.57899e-08	1.06632e-07
ENSG00000227722		dynactin 4 pseudogene	processed_transcript,transcribed_processed_pseudogene	11.6067	4.48102	1.02303	4.38014	1.18603e-05	5.88968e-05
ENSG00000227764	LINC01693	long intergenic non-protein coding RNA 1693 [Source:HGNC Symbol;Acc:HGNC:52478]	lncRNA,retained_intron	8.59058	2.44629	0.917028	2.66763	0.00763877	0.0233246
ENSG00000227917		novel transcript	lncRNA	2.29805	4.65187	1.82866	2.54386	0.0109634	0.0321406
ENSG00000227963	RBM15-AS1	RBM15 antisense RNA 1 [Source:HGNC Symbol;Acc:HGNC:53636]	lncRNA	20.6908	1.65889	0.510108	3.25204	0.00114578	0.0041776
ENSG00000227992		pseudogene similar to part of ubiquitin carboxyl-terminal hydrolase L5 UCHL5	processed_pseudogene	58.5497	-6.87261	0.876568	-7.84036	4.49255e-15	4.75632e-14
ENSG00000228037		novel transcript	lncRNA	5.62369	3.36569	1.21964	2.75957	0.00578776	0.0182168
ENSG00000228063	LYPLAL1-DT	LYPLAL1 divergent transcript [Source:HGNC Symbol;Acc:HGNC:50560]	lncRNA	13.5792	1.93685	0.708416	2.73406	0.00625596	0.0195415
ENSG00000228157		novel transcript	lncRNA,retained_intron	8.09831	3.48817	1.01578	3.43397	0.000594817	0.00228485
ENSG00000228204		novel transcript, antisense to COBL	lncRNA	8.63425	-2.68337	0.87297	-3.07384	0.00211321	0.00733065
ENSG00000228216		novel transcript	lncRNA	2.33167	4.66971	1.79107	2.60722	0.00912799	0.0273446
ENSG00000228221	LINC00578	long intergenic non-protein coding RNA 578 [Source:HGNC Symbol;Acc:HGNC:43807]	lncRNA	17.8888	-2.87571	0.610119	-4.71335	2.43676e-06	1.31311e-05
ENSG00000228307	OR2S1P	olfactory receptor family 2 subfamily S member 1 pseudogene [Source:HGNC Symbol;Acc:HGNC:8275]	transcribed_unprocessed_pseudogene	7.32549	2.40978	0.968595	2.48791	0.0128496	0.0369228
ENSG00000228407		pseudogene similar to part of alcohol dehydrogenase 5 (class III), chi polypeptidem (ADH5)	processed_pseudogene	40.1086	1.9044	0.385689	4.93765	7.90683e-07	4.49539e-06
ENSG00000228423		novel transcript	lncRNA	4.81073	4.70312	1.5241	3.08584	0.00202979	0.00706396
ENSG00000228485	GRK5-IT1	GRK5 intronic transcript 1 [Source:HGNC Symbol;Acc:HGNC:49478]	lncRNA	36.0864	3.30504	0.471035	7.01656	2.27404e-12	2.0377e-11
ENSG00000228487		novel transcript, antisense to RALGPS1	lncRNA	2.98456	-3.98873	1.67216	-2.38538	0.0170615	0.0474336
ENSG00000228566		novel transcript	lncRNA	15.4743	-1.96133	0.663937	-2.95409	0.00313597	0.0104938
ENSG00000228634		novel transcript	lncRNA	5.75208	3.39933	1.19656	2.84091	0.00449847	0.0145191
ENSG00000228636	LINC02663	long intergenic non-protein coding RNA 2663 [Source:HGNC Symbol;Acc:HGNC:54149]	lncRNA	57.9778	-1.67028	0.305426	-5.46869	4.53377e-08	2.94276e-07
ENSG00000228663	PSMD10P1	proteasome 26S subunit, non-ATPase, 10 pseudogene 1 [Source:HGNC Symbol;Acc:HGNC:16602]	processed_pseudogene	7.74352	3.41945	1.02044	3.35095	0.000805346	0.00302104
ENSG00000228666	KRT18P1	keratin 18 pseudogene 1 [Source:HGNC Symbol;Acc:HGNC:6434]	processed_pseudogene	7.79988	2.77081	0.917826	3.01889	0.00253704	0.0086542
ENSG00000228686		novel transcript	lncRNA	16.6385	3.74086	0.752592	4.97063	6.6735e-07	3.82191e-06
ENSG00000228697		novel transcript	lncRNA	19.5635	3.59732	0.707151	5.08706	3.63666e-07	2.14212e-06
ENSG00000228701	TNKS2-DT	TNKS2 divergent transcript [Source:HGNC Symbol;Acc:HGNC:45173]	lncRNA	24.697	-2.11196	0.482173	-4.38009	1.18631e-05	5.89014e-05
ENSG00000228723	SRGAP3-AS2	SRGAP3 antisense RNA 2 [Source:HGNC Symbol;Acc:HGNC:40899]	lncRNA	2.9865	3.98337	1.64115	2.42717	0.015217	0.042958
ENSG00000228740	GABRG3-AS1	GABRG3 antisense RNA 1 [Source:HGNC Symbol;Acc:HGNC:40249]	lncRNA	6.24859	5.09444	1.42981	3.56301	0.000366626	0.00146234
ENSG00000228741	SPATA13	spermatogenesis associated 13 [Source:NCBI gene (formerly Entrezgene);Acc:221178]	lncRNA	19.2825	4.20033	0.745819	5.63183	1.78307e-08	1.19753e-07
ENSG00000228816	AK3P5	adenylate kinase 3 pseudogene 5 [Source:HGNC Symbol;Acc:HGNC:39064]	processed_pseudogene	11.2895	2.08528	0.745726	2.79632	0.00516889	0.0164673
ENSG00000228836	CT45A5	cancer/testis antigen family 45 member A5 [Source:HGNC Symbol;Acc:HGNC:33270]	protein_coding	7.93901	-2.12146	0.859043	-2.46956	0.0135279	0.0386465
ENSG00000228983	SLC47A1P1	SLC47A1 pseudogene 1 [Source:HGNC Symbol;Acc:HGNC:51849]	transcribed_unprocessed_pseudogene	3.98374	4.42004	1.55559	2.8414	0.00449162	0.0145018
ENSG00000229048	DUTP1	deoxyuridine triphosphatase pseudogene 1 [Source:HGNC Symbol;Acc:HGNC:31956]	processed_pseudogene	7.29344	2.39792	0.935002	2.56461	0.0103291	0.0304445
ENSG00000229056	HECW2-AS1	HECW2 antisense RNA 1 [Source:HGNC Symbol;Acc:HGNC:54062]	lncRNA	25.2428	3.19877	0.618418	5.17251	2.30966e-07	1.38791e-06
ENSG00000229120	CYCSP4	CYCS pseudogene 4 [Source:HGNC Symbol;Acc:HGNC:24413]	processed_pseudogene	2.66106	4.8608	1.78262	2.72677	0.00639569	0.0199474
ENSG00000229246	LINC00377	long intergenic non-protein coding RNA 377 [Source:HGNC Symbol;Acc:HGNC:42703]	lncRNA	3.97257	-5.4448	1.62869	-3.34306	0.000828597	0.00309989
ENSG00000229261		novel transcript, antisense to HKDC1	lncRNA	39.9162	1.52517	0.377823	4.03674	5.42e-05	0.000246082
ENSG00000229267	SNHG31	small nucleolar RNA host gene 31 [Source:HGNC Symbol;Acc:HGNC:54196]	lncRNA	41.8068	-2.50492	0.454226	-5.5147	3.49371e-08	2.28907e-07
ENSG00000229309		novel transcript	lncRNA	4.31534	4.54056	1.53529	2.95746	0.00310181	0.0103864
ENSG00000229311		novel transcript	lncRNA	19.2012	-2.09684	0.567743	-3.69329	0.00022137	0.000915833
ENSG00000229321		novel transcript	lncRNA	40.6179	2.11164	0.390322	5.40999	6.30294e-08	4.03454e-07
ENSG00000229375	USP24P1	ubiquitin specific peptidase 24 pseudogene 1 [Source:HGNC Symbol;Acc:HGNC:42014]	unprocessed_pseudogene	74.2064	-1.80396	0.269992	-6.68154	2.3644e-11	1.98049e-10
ENSG00000229399		prefoldin 5 (PFDN5) pseudogene	processed_pseudogene	7.74173	2.76682	0.944544	2.92927	0.00339764	0.0112806
ENSG00000229672		novel transcript	lncRNA	8.46666	-2.22855	0.836815	-2.66314	0.00774161	0.0235959
ENSG00000229688	CRPPA-AS1	CRPPA antisense RNA 1 [Source:HGNC Symbol;Acc:HGNC:48962]	lncRNA	13.7915	1.84762	0.737499	2.50525	0.0122363	0.0354237
ENSG00000229757	RPL7AP21	ribosomal protein L7a pseudogene 21 [Source:HGNC Symbol;Acc:HGNC:37020]	processed_pseudogene	2.81824	-4.94925	1.70523	-2.9024	0.00370321	0.0122036
ENSG00000229847	EMX2OS	EMX2 opposite strand/antisense RNA [Source:HGNC Symbol;Acc:HGNC:18511]	lncRNA	155.794	-2.05161	0.195136	-10.5137	7.46731e-26	1.29387e-24
ENSG00000229901	FOXO6-AS1	FOXO6 antisense RNA 1 [Source:HGNC Symbol;Acc:HGNC:41066]	lncRNA	20.0685	2.93383	0.635606	4.6158	3.91588e-06	2.05651e-05
ENSG00000229920	RPS4XP5	ribosomal protein S4X pseudogene 5 [Source:HGNC Symbol;Acc:HGNC:36670]	processed_transcript,transcribed_processed_pseudogene	37.2688	-4.43147	0.571423	-7.75515	8.82417e-15	9.17072e-14
ENSG00000229989	MIR181A1HG	MIR181A1 host gene [Source:HGNC Symbol;Acc:HGNC:48659]	lncRNA	33.332	2.6865	0.459866	5.84192	5.16036e-09	3.63341e-08
ENSG00000230002	ALMS1-IT1	ALMS1 intronic transcript 1 [Source:HGNC Symbol;Acc:HGNC:41305]	lncRNA	177.128	-1.82464	0.176312	-10.3489	4.2325e-25	7.12369e-24
ENSG00000230071	RPL4P6	ribosomal protein L4 pseudogene 6 [Source:HGNC Symbol;Acc:HGNC:35611]	processed_pseudogene	50.834	3.09951	0.399409	7.76025	8.47654e-15	8.81843e-14
ENSG00000230102	LINC02028	long intergenic non-protein coding RNA 2028 [Source:HGNC Symbol;Acc:HGNC:27718]	lncRNA,retained_intron	10.7819	1.8647	0.708331	2.63253	0.00847519	0.0255973
ENSG00000230109	LINC02643	long intergenic non-protein coding RNA 2643 [Source:HGNC Symbol;Acc:HGNC:54126]	lncRNA	13.0066	2.33728	0.73246	3.191	0.00141781	0.00507856
ENSG00000230176	LINC01433	long intergenic non-protein coding RNA 1433 [Source:HGNC Symbol;Acc:HGNC:50746]	lncRNA	3.28001	4.12954	1.62643	2.53902	0.0111164	0.0325234
ENSG00000230432		novel transcript	lncRNA	13.4303	2.25701	0.658799	3.42595	0.000612659	0.0023469
ENSG00000230433		novel transcript	lncRNA	4.79491	3.11595	1.26243	2.46822	0.0135788	0.0387704
ENSG00000230496	MTCO2P7	MT-CO2 pseudogene 7 [Source:HGNC Symbol;Acc:HGNC:52023]	unprocessed_pseudogene	3.62252	4.27868	1.5738	2.71869	0.00655416	0.0203855
ENSG00000230499		novel transcript	lncRNA	27.7149	-8.24681	1.24056	-6.64766	2.97785e-11	2.47738e-10
ENSG00000230536		novel transcript	lncRNA	8.78108	3.61341	1.02896	3.51171	0.000445232	0.00175091
ENSG00000230585	PHB1P12	PHB1 pseudogene 12 [Source:HGNC Symbol;Acc:HGNC:39291]	processed_pseudogene	26.7534	3.63818	0.562516	6.4677	9.95064e-11	8.01215e-10
ENSG00000230593	PPIAP40	peptidylprolyl isomerase A pseudogene 40 [Source:HGNC Symbol;Acc:HGNC:53664]	processed_pseudogene	29.368	3.66055	0.553761	6.61034	3.83438e-11	3.1658e-10
ENSG00000230598	OR2H4P	olfactory receptor family 2 subfamily H member 4 pseudogene [Source:HGNC Symbol;Acc:HGNC:8255]	transcribed_unprocessed_pseudogene	3.13194	5.09768	1.64401	3.10075	0.0019303	0.00674897
ENSG00000230604	TSEN15P2	tRNA splicing endonuclease subunit 15 pseudogene 2 [Source:HGNC Symbol;Acc:HGNC:43963]	processed_pseudogene	2.15451	4.55676	1.81648	2.50857	0.012122	0.0351333
ENSG00000230661	YY1P1	YY1 transcription factor pseudogene 1 [Source:HGNC Symbol;Acc:HGNC:45094]	processed_pseudogene	3.31779	5.17942	1.62459	3.18815	0.00143188	0.00512294
ENSG00000230796		family with sequence similarity 27 (FAM27) pseudogene	unprocessed_pseudogene	7.79981	-5.42525	1.38499	-3.91718	8.95891e-05	0.000394453
ENSG00000230815		novel transcript	lncRNA	3.43556	4.20031	1.63032	2.57638	0.00998422	0.0295731
ENSG00000230825	LINC03016	long intergenic non-protein coding RNA 3016 [Source:HGNC Symbol;Acc:HGNC:56145]	lncRNA,retained_intron	19.3727	-1.74374	0.522915	-3.33465	0.000854075	0.00318935
ENSG00000230826		novel transcript	lncRNA	2.96769	5.01991	1.66967	3.00652	0.00264255	0.00898439
ENSG00000230838	LINC01614	long intergenic non-protein coding RNA 1614 [Source:HGNC Symbol;Acc:HGNC:51847]	lncRNA	17.2082	-2.8168	0.656115	-4.29315	1.76158e-05	8.56005e-05
ENSG00000230882		hypothetical protein LOC285908 (LOC285908) pseudogene	processed_pseudogene	74.1263	5.06508	0.900679	5.62363	1.86988e-08	1.2539e-07
ENSG00000230922		novel transcript	lncRNA	105.86	2.80472	0.273226	10.2652	1.01111e-24	1.68051e-23
ENSG00000230928		novel transcript	lncRNA	60.9854	-1.85298	0.29683	-6.24256	4.30461e-10	3.31328e-09
ENSG00000230947		novel transcript	lncRNA	9.1963	3.68923	0.995991	3.70408	0.000212159	0.000879391
ENSG00000230987		DEAH (Asp-Glu-Ala-His) box polypeptide 29 (DHX29) pseudogene	processed_pseudogene	87.1396	1.54599	0.251886	6.13764	8.37576e-10	6.31332e-09
ENSG00000230988	RPL23AP11	ribosomal protein L23a pseudogene 11 [Source:HGNC Symbol;Acc:HGNC:19808]	processed_pseudogene	5.1144	5.80499	1.48131	3.91881	8.89863e-05	0.000391968
ENSG00000230991		novel transcript	lncRNA	4.47693	-3.00353	1.27064	-2.36379	0.0180891	0.0498868
ENSG00000231040	LINC01911	long intergenic non-protein coding RNA 1911 [Source:HGNC Symbol;Acc:HGNC:52730]	lncRNA	1.99415	-4.44969	1.87032	-2.37911	0.0173547	0.0481437
ENSG00000231104		novel transcript, antisense to RAB11FIP2	lncRNA	8.98303	2.32587	0.832713	2.79313	0.00522014	0.0166162
ENSG00000231134	TCF7L1-IT1	TCF7L1 intronic transcript 1 [Source:HGNC Symbol;Acc:HGNC:41388]	lncRNA	2.30227	4.6542	1.78892	2.60168	0.00927675	0.0277522
ENSG00000231204		novel transcript	lncRNA	50.2371	-3.36109	0.39858	-8.43265	3.3791e-17	4.00474e-16
ENSG00000231301	RPL13AP	ribosomal protein L13a pseudogene [Source:HGNC Symbol;Acc:HGNC:13977]	processed_pseudogene	2.12332	4.53874	1.88689	2.40541	0.0161543	0.045253
ENSG00000231427	LINC01445	long intergenic non-protein coding RNA 1445 [Source:HGNC Symbol;Acc:HGNC:50771]	lncRNA	5.00391	-4.76475	1.55637	-3.06146	0.00220258	0.0076113
ENSG00000231468	PRDX3P2	peroxiredoxin 3 pseudogene 2 [Source:HGNC Symbol;Acc:HGNC:39265]	processed_pseudogene	11.7525	2.02454	0.701912	2.88433	0.00392251	0.0128418
ENSG00000231698		novel transcript	lncRNA	7.13721	-2.36465	0.908482	-2.60286	0.00924504	0.0276627
ENSG00000231703		novel transcript, antisense to TSHZ2	lncRNA	3.3069	-4.14261	1.75176	-2.36482	0.0180387	0.0497762
ENSG00000231799	PA2G4P6	proliferation-associated 2G4 pseudogene 6 [Source:HGNC Symbol;Acc:HGNC:32219]	processed_pseudogene	3.3337	4.15016	1.61716	2.56633	0.0102781	0.0303234
ENSG00000231849	UBE2V2P4	ubiquitin conjugating enzyme E2 V2 pseudogene 4 [Source:HGNC Symbol;Acc:HGNC:44892]	processed_pseudogene	2.32387	4.66559	1.78638	2.61176	0.00900782	0.027027
ENSG00000231881		novel transcript	lncRNA	65.5358	1.91364	0.33156	5.77163	7.85069e-09	5.44119e-08
ENSG00000231948	HS1BP3-IT1	HS1BP3 intronic transcript 1 [Source:HGNC Symbol;Acc:HGNC:41474]	lncRNA	60.8179	2.59778	0.336842	7.71216	1.23707e-14	1.27268e-13
ENSG00000231954	MTND2P22	MT-ND2 pseudogene 22 [Source:HGNC Symbol;Acc:HGNC:42123]	unprocessed_pseudogene	4.98546	4.75588	1.4816	3.20997	0.00132749	0.00478474
ENSG00000231977		novel transcript	lncRNA	2.3302	-4.67408	1.82421	-2.56224	0.0103998	0.0306301
ENSG00000232034		novel transcript	lncRNA	50.5116	3.24911	0.388189	8.36992	5.76574e-17	6.75988e-16
ENSG00000232043		novel transcript, antisense to PTPN1	lncRNA	12.3941	1.77018	0.734754	2.40922	0.0159867	0.0448451
ENSG00000232046	LINC01798	long intergenic non-protein coding RNA 1798 [Source:HGNC Symbol;Acc:HGNC:52588]	lncRNA	1.98564	-4.44446	1.87719	-2.36762	0.0179031	0.0494495
ENSG00000232083	RPL31P7	ribosomal protein L31 pseudogene 7 [Source:HGNC Symbol;Acc:HGNC:31325]	processed_pseudogene	5.98728	6.03059	1.45547	4.14339	3.42209e-05	0.000159689
ENSG00000232142	RPS25P9	ribosomal protein S25 pseudogene 9 [Source:HGNC Symbol;Acc:HGNC:36936]	processed_pseudogene	2.47431	4.75749	1.75367	2.71288	0.0066701	0.0206955
ENSG00000232259		novel transcript	lncRNA	68.9639	2.23266	0.291326	7.66379	1.8053e-14	1.8436e-13
ENSG00000232290		novel transcript	lncRNA	8.06501	3.92864	1.11591	3.52058	0.000430601	0.00169889
ENSG00000232294		novel transcript	lncRNA	4.14657	-5.50626	1.54319	-3.5681	0.000359585	0.00143594
ENSG00000232325		novel transcript	lncRNA	5.28315	-2.81666	1.1641	-2.41961	0.0155372	0.0437609
ENSG00000232387	SKA2P1	spindle and kinetochore associated complex subunit 2 pseudogene 1 [Source:HGNC Symbol;Acc:HGNC:23122]	processed_pseudogene	8.61735	-2.26382	0.862773	-2.62389	0.00869323	0.0261988
ENSG00000232423	PRAMEF6	PRAME family member 6 [Source:HGNC Symbol;Acc:HGNC:30583]	protein_coding	3.98644	-5.44917	1.61573	-3.37258	0.000744662	0.00281342
ENSG00000232445	EMSLR	E2F1 mRNA stabilizing lncRNA [Source:HGNC Symbol;Acc:HGNC:54408]	lncRNA	4.27235	4.52763	1.53406	2.9514	0.00316333	0.010575
ENSG00000232448		novel transcript	lncRNA	18.447	2.28737	0.684299	3.34265	0.000829838	0.00310415
ENSG00000232471		ankyrin repeat domain family (ANKRD) pseudogene	unprocessed_pseudogene	12.2794	-1.64156	0.655022	-2.50612	0.0122065	0.0353508
ENSG00000232487	RASA3-IT1	RASA3 intronic transcript 1 [Source:HGNC Symbol;Acc:HGNC:39938]	lncRNA	6.28494	2.41188	0.973207	2.47828	0.0132016	0.0378155
ENSG00000232564	MRTFA-AS1	MRTFA antisense RNA 1 [Source:HGNC Symbol;Acc:HGNC:40681]	lncRNA	8.28584	2.60936	0.978644	2.66631	0.007669	0.0234005
ENSG00000232615		protein phosphatase 4, regulatory subunit 2 (PPP4R2) pseudogene	processed_pseudogene	15.3877	1.68358	0.595072	2.8292	0.00466649	0.0150055
ENSG00000232624	LINC01517	long intergenic non-protein coding RNA 1517 [Source:HGNC Symbol;Acc:HGNC:51212]	lncRNA,retained_intron	9.62156	2.44496	0.831099	2.94184	0.00326271	0.010868
ENSG00000232671	ZNF687-AS1	ZNF687 antisense RNA 1 [Source:HGNC Symbol;Acc:HGNC:54048]	lncRNA	15.2672	-1.95389	0.648456	-3.01314	0.00258562	0.00880452
ENSG00000232684	ATP11A-AS1	ATP11A antisense RNA 1 [Source:HGNC Symbol;Acc:HGNC:40645]	lncRNA	7.0849	3.73189	1.16512	3.20302	0.00135995	0.00489196
ENSG00000232693		novel transcript, sense intronic to SPRED2	lncRNA	41.2417	8.81558	1.21999	7.22596	4.97589e-13	4.67388e-12
ENSG00000232729	GTF2I-AS1	GTF2I antisense RNA 1 [Source:HGNC Symbol;Acc:HGNC:55572]	lncRNA,retained_intron	13.13	2.63316	0.767592	3.43041	0.000602668	0.0023124
ENSG00000232739		novel transcript	lncRNA	22.6264	1.53783	0.490649	3.13429	0.00172273	0.00607678
ENSG00000232762		novel transcript	lncRNA	60.4141	4.26439	0.437838	9.73965	2.04247e-22	3.09816e-21
ENSG00000232774	LINC03033	long intergenic non-protein coding RNA 3033 [Source:HGNC Symbol;Acc:HGNC:44292]	lncRNA	3418.52	-4.88096	0.0747678	-65.2816	0	0
ENSG00000232855		novel transcript	lncRNA	160.477	2.2319	0.201966	11.0509	2.171e-28	4.14211e-27
ENSG00000232912	RERE-AS1	RERE antisense RNA 1 [Source:HGNC Symbol;Acc:HGNC:40501]	lncRNA	5.61377	2.90284	1.11235	2.60965	0.00906336	0.0271803
ENSG00000232913	PLCE1-AS2	PLCE1 antisense RNA 2 [Source:HGNC Symbol;Acc:HGNC:51206]	lncRNA	8.92709	4.69816	1.23552	3.80258	0.000143198	0.000610611
ENSG00000232926		ribosomal protein L8 (RPL8) pseudogene	processed_pseudogene	70.4338	1.79651	0.291857	6.15543	7.48747e-10	5.66052e-09
ENSG00000232939		novel transcript	lncRNA	22.2348	-1.61931	0.512976	-3.1567	0.00159565	0.00566645
ENSG00000233038	PTPRN2-AS1	PTPRN2 antisense RNA 1 [Source:HGNC Symbol;Acc:HGNC:40488]	lncRNA	1.98989	-4.44708	1.85762	-2.39397	0.0166673	0.0464856
ENSG00000233085		novel transcript	lncRNA	5.86424	4.058	1.3893	2.92088	0.00349039	0.0115534
ENSG00000233215	LINC01687	long intergenic non-protein coding RNA 1687 [Source:HGNC Symbol;Acc:HGNC:52474]	lncRNA	28.8344	-2.64944	0.464156	-5.70808	1.1426e-08	7.81463e-08
ENSG00000233247	UBE2E4P	ubiquitin conjugating enzyme E2 E4 pseudogene [Source:HGNC Symbol;Acc:HGNC:32199]	processed_pseudogene	18.5579	-1.95758	0.535979	-3.65234	0.000259864	0.00106215
ENSG00000233266	HMGB1P31	high mobility group box 1 pseudogene 31 [Source:HGNC Symbol;Acc:HGNC:39122]	processed_pseudogene	5.95434	-3.01062	1.09974	-2.73758	0.00618936	0.0193493
ENSG00000233293		novel transcript, antisense to NOL4L	lncRNA	18.181	5.74957	1.12251	5.12206	3.02214e-07	1.79188e-06
ENSG00000233334	FAM53B-AS1	FAM53B antisense RNA 1 [Source:HGNC Symbol;Acc:HGNC:49499]	lncRNA	3.66162	5.32111	1.636	3.25251	0.00114389	0.00417219
ENSG00000233358		novel transcript	lncRNA	3.81587	-5.3863	1.58163	-3.40553	0.000660349	0.00251383
ENSG00000233424		novel transcript	lncRNA	18.1022	-1.60042	0.571192	-2.8019	0.00508032	0.0162138
ENSG00000233478		novel transcript	lncRNA	5.28718	3.26933	1.19445	2.73709	0.00619858	0.0193721
ENSG00000233540	DNM3-IT1	DNM3 intronic transcript 1 [Source:HGNC Symbol;Acc:HGNC:41494]	lncRNA	2.1563	4.55781	1.83817	2.47954	0.0131551	0.0377155
ENSG00000233571		novel transcript	lncRNA	11.7356	-2.03928	0.724899	-2.8132	0.00490517	0.0157189
ENSG00000233593	LINC02609	long intergenic non-protein coding RNA 2609 [Source:HGNC Symbol;Acc:HGNC:27140]	lncRNA,retained_intron	4.13556	-4.48298	1.5394	-2.91216	0.00358934	0.0118552
ENSG00000233602	ERI3-IT1	ERI3 intronic transcript 1 [Source:HGNC Symbol;Acc:HGNC:41431]	lncRNA	14.4248	1.56304	0.633948	2.46556	0.01368	0.0390336
ENSG00000233639	PANTR1	POU3F3 adjacent non-coding transcript 1 [Source:HGNC Symbol;Acc:HGNC:49513]	lncRNA	106.626	-2.70233	0.25785	-10.4803	1.06444e-25	1.83707e-24
ENSG00000233718	MYCNOS	MYCN opposite strand [Source:HGNC Symbol;Acc:HGNC:16911]	lncRNA	10.0886	-2.19577	0.780294	-2.81403	0.00489249	0.0156832
ENSG00000233723	LINC01122	long intergenic non-protein coding RNA 1122 [Source:HGNC Symbol;Acc:HGNC:49267]	lncRNA	16.4165	-1.64899	0.562498	-2.93154	0.00337284	0.0112055
ENSG00000233828	MIR4280HG	MIR4280 host gene [Source:HGNC Symbol;Acc:HGNC:54975]	lncRNA	9.45249	-3.72941	0.958055	-3.89269	9.9138e-05	0.000433685
ENSG00000233884		novel transcript	lncRNA	4.47731	-4.59952	1.54399	-2.97899	0.00289199	0.00974788
ENSG00000233962		family with sequence similarity 27 (FAM27) pseudogene	unprocessed_pseudogene	13.3002	-6.20692	1.31471	-4.72113	2.34539e-06	1.26633e-05
ENSG00000233967		novel transcript	lncRNA	28.3659	-5.39168	0.816279	-6.60519	3.97008e-11	3.2743e-10
ENSG00000233980	FDPSP2	farnesyl diphosphate synthase pseudogene 2 [Source:HGNC Symbol;Acc:HGNC:3633]	processed_pseudogene	5.7837	3.40798	1.17055	2.91143	0.00359783	0.0118794
ENSG00000234017		pseudogene similar to part of eukaryotic translation elongation factor 1 alpha 1 (EEF1A1)	processed_pseudogene	3.63432	4.28313	1.5825	2.70655	0.00679854	0.0210534
ENSG00000234036	TXNP6	thioredoxin pseudogene 6 [Source:HGNC Symbol;Acc:HGNC:49486]	processed_pseudogene	44.9396	3.57354	0.45156	7.91376	2.49728e-15	2.67634e-14
ENSG00000234085		family with sequence similarity 27 (FAM27) pseudogene	unprocessed_pseudogene	22.8794	-4.46647	0.723465	-6.17373	6.66986e-10	5.06873e-09
ENSG00000234123	RHBDF1P1	RHBDF1 pseudogene 1 [Source:HGNC Symbol;Acc:HGNC:44499]	processed_pseudogene	5.80812	4.04512	1.3591	2.97632	0.00291728	0.0098201
ENSG00000234210		novel transcript	lncRNA	4.29291	-3.59094	1.47161	-2.44015	0.0146812	0.0415992
ENSG00000234261		novel transcript	lncRNA	8.294	-4.59637	1.28438	-3.57866	0.000345364	0.00138349
ENSG00000234323	LINC01505	long intergenic non-protein coding RNA 1505 [Source:HGNC Symbol;Acc:HGNC:51186]	lncRNA	296.931	-1.67862	0.141172	-11.8906	1.32517e-32	2.87057e-31
ENSG00000234362	LINC01914	long intergenic non-protein coding RNA 1914 [Source:HGNC Symbol;Acc:HGNC:52733]	lncRNA	5.13234	-3.86661	1.39893	-2.76398	0.00571015	0.0179966
ENSG00000234421	SLC25A5P4	solute carrier family 25 member 5 pseudogene 4 [Source:HGNC Symbol;Acc:HGNC:35471]	processed_pseudogene	2.31518	4.66102	1.80638	2.58031	0.00987129	0.0292843
ENSG00000234446		novel transcript	lncRNA	4.25343	4.52183	1.56972	2.88066	0.00396843	0.0129686
ENSG00000234460		cathepsin L (CTSL) pseudogene	transcribed_unprocessed_pseudogene	210.005	-3.41384	0.194362	-17.5644	4.61934e-69	2.20266e-67
ENSG00000234575	CTSLP8	cathepsin L pseudogene 8 [Source:HGNC Symbol;Acc:HGNC:39084]	unprocessed_pseudogene	6.65479	-4.25351	1.30293	-3.26457	0.00109631	0.00400871
ENSG00000234619	RPL7P11	ribosomal protein L7 pseudogene 11 [Source:HGNC Symbol;Acc:HGNC:35667]	processed_pseudogene	2.14761	4.55286	1.81743	2.50511	0.0122414	0.0354316
ENSG00000234622		novel transcript	lncRNA	20.9104	-2.01518	0.528864	-3.8104	0.000138744	0.000593354
ENSG00000234640		novel transcript	lncRNA	2.64896	-4.86011	1.81654	-2.67547	0.0074624	0.0228545
ENSG00000234695	TFPI2-DT	TFPI2 divergent transcript [Source:HGNC Symbol;Acc:HGNC:40581]	lncRNA	7.46383	-5.3593	1.3954	-3.84069	0.00012269	0.000529887
ENSG00000234710		novel transcript	lncRNA	4.80814	-5.71991	1.50236	-3.80728	0.000140505	0.000600143
ENSG00000234724	HDAC1P1	histone deacetylase 1 pseudogene 1 [Source:HGNC Symbol;Acc:HGNC:45190]	processed_pseudogene	34.856	3.60064	0.494924	7.27514	3.46065e-13	3.28493e-12
ENSG00000234737	KRT18P15	keratin 18 pseudogene 15 [Source:HGNC Symbol;Acc:HGNC:32449]	processed_pseudogene	33.2396	1.78362	0.472423	3.77547	0.000159706	0.000675535
ENSG00000234740		novel transcript	lncRNA	34.7808	2.37088	0.420455	5.63885	1.71189e-08	1.15226e-07
ENSG00000234805		family with sequence similarity 151, member A (FAM151A) pseudogene	processed_pseudogene	58.1489	1.95252	0.317322	6.15311	7.59778e-10	5.74249e-09
ENSG00000234840	LINC01239	long intergenic non-protein coding RNA 1239 [Source:HGNC Symbol;Acc:HGNC:49796]	lncRNA,retained_intron	108.957	-3.70626	0.309514	-11.9744	4.83653e-33	1.06813e-31
ENSG00000234841		TAF4b RNA polymerase II, TATA box binding protein (TBP)-associated factor, 105kDa (TAF4B) pseudogene	processed_pseudogene	30.6236	2.42408	0.441584	5.48952	4.03035e-08	2.62492e-07
ENSG00000234861	ATP5F1AP1	ATP synthase F1 subunit alpha pseudogene 1 [Source:HGNC Symbol;Acc:HGNC:827]	processed_pseudogene	7.63555	3.04214	1.03689	2.93391	0.00334717	0.0111311
ENSG00000234889	KPNB1P1	KPNB1 pseudogene 1 [Source:HGNC Symbol;Acc:HGNC:55029]	processed_pseudogene	3.48925	-5.25687	1.61203	-3.26103	0.00111009	0.00405716
ENSG00000234969	AARSD1P1	AARSD1 pseudogene 1 [Source:HGNC Symbol;Acc:HGNC:54994]	processed_pseudogene	2.15621	-4.56284	1.85504	-2.4597	0.0139052	0.0396207
ENSG00000234977		novel transcript	lncRNA	5.43899	4.8879	1.46055	3.34662	0.000818047	0.00306454
ENSG00000235013	COX20P2	COX20 pseudogene 2 [Source:HGNC Symbol;Acc:HGNC:43772]	processed_pseudogene	14.7201	-1.53038	0.639105	-2.39456	0.0166403	0.0464357
ENSG00000235052		novel transcript	lncRNA	19.7321	1.56662	0.520597	3.00928	0.00261864	0.00890761
ENSG00000235081		novel pseudogene	processed_pseudogene	15.2366	-1.85082	0.591359	-3.12977	0.00174941	0.00616591
ENSG00000235253	EEF1A1P50	eukaryotic translation elongation factor 1 alpha 1 pseudogene 50 [Source:HGNC Symbol;Acc:HGNC:56207]	processed_pseudogene	3.34029	5.18782	1.65125	3.14176	0.00167938	0.00593413
ENSG00000235269	LINC02331	long intergenic non-protein coding RNA 2331 [Source:HGNC Symbol;Acc:HGNC:53251]	lncRNA	257.705	-1.54582	0.148774	-10.3904	2.74193e-25	4.66373e-24
ENSG00000235271		novel transcript	lncRNA	8.46141	-2.91386	0.926202	-3.14603	0.00165503	0.00585486
ENSG00000235397	EPN2-AS1	EPN2 antisense RNA 1 [Source:HGNC Symbol;Acc:HGNC:40849]	lncRNA	22.6328	7.95047	1.25489	6.3356	2.36421e-10	1.85621e-09
ENSG00000235419		novel transcript, antisense to SP100	lncRNA	2.31006	4.65833	1.77965	2.61755	0.00885635	0.0266431
ENSG00000235420	RPL29P30	ribosomal protein L29 pseudogene 30 [Source:HGNC Symbol;Acc:HGNC:36601]	processed_transcript,transcribed_processed_pseudogene	21.6227	1.5604	0.500493	3.11773	0.00182249	0.00639766
ENSG00000235426		novel transcript	lncRNA	18.0738	3.30826	0.699747	4.72779	2.26981e-06	1.22943e-05
ENSG00000235481	UBE2R2-AS1	UBE2R2 antisense RNA 1 [Source:HGNC Symbol;Acc:HGNC:49911]	lncRNA	46.3114	1.89794	0.371596	5.10754	3.26382e-07	1.92882e-06
ENSG00000235522		novel transcript	lncRNA	40.8251	4.2855	0.523514	8.18604	2.69966e-16	3.06406e-15
ENSG00000235529	AGAP1-IT1	AGAP1 intronic transcript 1 [Source:HGNC Symbol;Acc:HGNC:41427]	lncRNA	206.757	5.67092	0.329929	17.1883	3.24794e-66	1.46854e-64
ENSG00000235531	MSC-AS1	MSC antisense RNA 1 [Source:HGNC Symbol;Acc:HGNC:48724]	lncRNA	140.588	-2.5629	0.210922	-12.1509	5.6716e-34	1.28887e-32
ENSG00000235578		novel transcript	lncRNA	3.15366	-5.1112	1.64415	-3.10872	0.00187901	0.00658472
ENSG00000235609		novel transcript	lncRNA	32.6165	-2.60023	0.44982	-5.78059	7.44382e-09	5.16505e-08
ENSG00000235786	ZNRF3-IT1	ZNRF3 intronic transcript 1 [Source:HGNC Symbol;Acc:HGNC:41440]	lncRNA	24.1634	4.81579	0.764349	6.30052	2.96652e-10	2.31187e-09
ENSG00000235885	LINC01828	long intergenic non-protein coding RNA 1828 [Source:HGNC Symbol;Acc:HGNC:52634]	lncRNA	15.0782	2.02161	0.651459	3.1032	0.00191442	0.00669728
ENSG00000235989	MORC2-AS1	MORC2 antisense RNA 1 [Source:HGNC Symbol;Acc:HGNC:26662]	lncRNA	22.5939	1.53817	0.555729	2.76785	0.0056428	0.0178063
ENSG00000236047	RPL13AP12	ribosomal protein L13a pseudogene 12 [Source:HGNC Symbol;Acc:HGNC:35673]	processed_pseudogene	4.31808	-3.5763	1.41052	-2.53545	0.0112302	0.032803
ENSG00000236081	ELFN1-AS1	ELFN1 antisense RNA 1 [Source:HGNC Symbol;Acc:HGNC:39071]	lncRNA	9.42136	3.72423	0.97475	3.8207	0.000133071	0.000570771
ENSG00000236173		novel transcript	lncRNA	10.3082	2.38303	0.793601	3.00281	0.002675	0.00908662
ENSG00000236194		novel transcript, sense intronic to STAT5B	lncRNA	16.2031	1.70528	0.671719	2.53868	0.0111273	0.032549
ENSG00000236206		novel transcript	lncRNA	4.80887	-3.75696	1.35118	-2.7805	0.0054276	0.017209
ENSG00000236211	MTCO1P7	MT-CO1 pseudogene 7 [Source:HGNC Symbol;Acc:HGNC:52009]	unprocessed_pseudogene	5.6463	4.00154	1.3348	2.99785	0.00271891	0.00922243
ENSG00000236213		novel transcript	lncRNA	54.9818	2.33146	0.342441	6.80836	9.8716e-12	8.46355e-11
ENSG00000236242	MYO16-AS1	MYO16 antisense RNA 1 [Source:HGNC Symbol;Acc:HGNC:39913]	lncRNA	17.7426	-2.41366	0.594721	-4.05848	4.9394e-05	0.000225534
ENSG00000236261		family with sequence similarity 27 (FAM27) pseudogene	unprocessed_pseudogene	14.4215	-5.41589	1.15136	-4.70392	2.55214e-06	1.3719e-05
ENSG00000236268	LINC01361	long intergenic non-protein coding RNA 1361 [Source:HGNC Symbol;Acc:HGNC:50595]	lncRNA	3.99084	-4.42598	1.54687	-2.86124	0.0042199	0.0137083
ENSG00000236349	SUCLG2P2	SUCLG2 pseudogene 2 [Source:HGNC Symbol;Acc:HGNC:43997]	processed_pseudogene	10.4375	-2.25041	0.75956	-2.96278	0.00304871	0.0102209
ENSG00000236385		novel transcript	lncRNA	3.97711	-5.44626	1.55521	-3.50194	0.000461883	0.00181088
ENSG00000236411	NDUFAF4P3	NADH:ubiquinone oxidoreductase complex assembly factor 4 pseudogene 3 [Source:HGNC Symbol;Acc:HGNC:44542]	processed_pseudogene	5.49357	-3.32242	1.21295	-2.73913	0.0061602	0.0192601
ENSG00000236426		novel transcript	lncRNA	37.209	4.95723	0.647371	7.65748	1.89624e-14	1.93259e-13
ENSG00000236427	LINC02962	long intergenic non-protein coding RNA 2962 [Source:HGNC Symbol;Acc:HGNC:55988]	lncRNA	28.0582	3.26279	0.568599	5.73829	9.56361e-09	6.59102e-08
ENSG00000236437	LINC02151	long intergenic non-protein coding RNA 2151 [Source:HGNC Symbol;Acc:HGNC:53013]	lncRNA	2.48358	-4.76714	1.75221	-2.72065	0.00651534	0.0202796
ENSG00000236449		novel transcript, antisense to WIPF1 and CHRNA1	lncRNA	86.0619	-1.62969	0.254592	-6.40119	1.54169e-10	1.22841e-09
ENSG00000236451		novel transcript	lncRNA	20.7064	-4.07407	0.7269	-5.60473	2.08585e-08	1.39292e-07
ENSG00000236510		novel transcript	lncRNA	7.60401	2.73151	0.945784	2.88809	0.00387583	0.0127095
ENSG00000236526	BTBD3-AS1	BTBD3 antisense RNA 1 [Source:HGNC Symbol;Acc:HGNC:40728]	lncRNA	36.5316	3.24715	0.480295	6.76075	1.37283e-11	1.16557e-10
ENSG00000236532	LINC01695	long intergenic non-protein coding RNA 1695 [Source:HGNC Symbol;Acc:HGNC:52483]	lncRNA	54.2344	-2.72671	0.348216	-7.8305	4.85936e-15	5.13399e-14
ENSG00000236559	BCL2L1-AS1	BCL2L1 antisense RNA 1 [Source:HGNC Symbol;Acc:HGNC:40095]	lncRNA	11.3512	4.01403	0.958169	4.18927	2.79848e-05	0.000132306
ENSG00000236581	STARD13-AS	STARD13 antisense RNA [Source:HGNC Symbol;Acc:HGNC:40873]	lncRNA,retained_intron	124.371	1.86027	0.211419	8.79898	1.38068e-18	1.74166e-17
ENSG00000236591	UST-AS2	UST antisense RNA 2 [Source:HGNC Symbol;Acc:HGNC:40803]	lncRNA	4.65425	-3.06575	1.27351	-2.40733	0.0160699	0.0450454
ENSG00000236651	DLX2-DT	DLX2 divergent transcript [Source:HGNC Symbol;Acc:HGNC:50638]	lncRNA	16.2154	2.70558	0.622915	4.34342	1.40284e-05	6.90686e-05
ENSG00000236758	MTUS2-AS2	MTUS2 antisense RNA 2 [Source:HGNC Symbol;Acc:HGNC:40923]	lncRNA	30.4362	-3.132	0.577436	-5.42398	5.82861e-08	3.74189e-07
ENSG00000236790	LINC00299	long intergenic non-protein coding RNA 299 [Source:HGNC Symbol;Acc:HGNC:27940]	lncRNA	72.9845	-4.25118	0.388044	-10.9554	6.25894e-28	1.17509e-26
ENSG00000236854	LINC00486	long intergenic non-protein coding RNA 486 [Source:NCBI gene (formerly Entrezgene);Acc:285045]	lncRNA	2.45181	4.7461	1.81485	2.61515	0.0089188	0.0268073
ENSG00000236867		suppressor of cytokine signaling 2 (SOCS2) pseudogene	processed_pseudogene	19.7217	3.02571	0.616943	4.90436	9.37336e-07	5.29275e-06
ENSG00000236935		novel transcript	lncRNA	2.33167	4.66971	1.79107	2.60722	0.00912799	0.0273446
ENSG00000236969	GGT8P	gamma-glutamyltransferase 8 pseudogene [Source:HGNC Symbol;Acc:HGNC:33438]	unprocessed_pseudogene	35.0988	1.54419	0.446416	3.45909	0.000541997	0.00209645
ENSG00000236993	GAPDHP21	glyceraldehyde 3 phosphate dehydrogenase pseudogene 21 [Source:HGNC Symbol;Acc:HGNC:37773]	processed_pseudogene	35.5332	-5.72115	0.807974	-7.08086	1.43267e-12	1.30287e-11
ENSG00000237013	LINC01812	long intergenic non-protein coding RNA 1812 [Source:HGNC Symbol;Acc:HGNC:52616]	lncRNA	7.43305	2.69871	0.97767	2.76035	0.00577389	0.0181787
ENSG00000237061		novel transcript	lncRNA	4.79233	3.75012	1.39259	2.69292	0.00708298	0.0218303
ENSG00000237115		T-cell activation leucine repeat-rich protein (TA-LRRP) pseudogene	processed_pseudogene	34.6844	1.95146	0.400075	4.87774	1.07307e-06	6.01804e-06
ENSG00000237119	LINC01056	long intergenic non-protein coding RNA 1056 [Source:HGNC Symbol;Acc:HGNC:49050]	lncRNA	7.72339	3.8635	1.11281	3.47186	0.000516872	0.00200637
ENSG00000237164	SLC25A15P2	solute carrier family 25 member 15 pseudogene 2 [Source:HGNC Symbol;Acc:HGNC:39843]	unprocessed_pseudogene	10.7372	-2.30478	0.86411	-2.66723	0.00764786	0.0233453
ENSG00000237212		novel transcript	lncRNA	5.97538	-5.02987	1.42982	-3.51783	0.000435097	0.00171552
ENSG00000237222	LINC01968	long intergenic non-protein coding RNA 1968 [Source:HGNC Symbol;Acc:HGNC:52794]	lncRNA	86.5158	1.59147	0.269493	5.90541	3.51773e-09	2.51625e-08
ENSG00000237243	CREB3L2-AS1	CREB3L2 antisense RNA 1 [Source:HGNC Symbol;Acc:HGNC:41030]	lncRNA	4.98672	5.76695	1.51765	3.79991	0.000144746	0.00061678
ENSG00000237289	CKMT1B	creatine kinase, mitochondrial 1B [Source:HGNC Symbol;Acc:HGNC:1995]	nonsense_mediated_decay,protein_coding,protein_coding_CDS_not_defined,retained_intron	33.4529	1.80264	0.428939	4.20256	2.63908e-05	0.000125215
ENSG00000237328	RAI1-AS1	RAI1 antisense RNA 1 [Source:HGNC Symbol;Acc:HGNC:40496]	lncRNA	3.80964	5.37924	1.60466	3.35227	0.000801525	0.00300818
ENSG00000237406	NDUFA9P1	NADH:ubiquinone oxidoreductase subunit A9 pseudogene 1 [Source:HGNC Symbol;Acc:HGNC:19252]	processed_pseudogene	14.5775	3.13344	0.763828	4.10229	4.09084e-05	0.00018922
ENSG00000237423	LINC01522	long intergenic non-protein coding RNA 1522 [Source:HGNC Symbol;Acc:HGNC:51224]	lncRNA	33.0819	2.04194	0.413639	4.93651	7.95324e-07	4.52094e-06
ENSG00000237540	RPL36AP36	ribosomal protein L36a pseudogene 36 [Source:HGNC Symbol;Acc:HGNC:36326]	processed_pseudogene	2.33077	4.66927	1.80452	2.58754	0.0096664	0.028763
ENSG00000237560	LINC01497	long intergenic non-protein coding RNA 1497 [Source:HGNC Symbol;Acc:HGNC:51163]	lncRNA	8.45012	-2.66245	0.867923	-3.06761	0.0021578	0.0074699
ENSG00000237639		family with sequence similarity 27 (FAM27) pseudogene	unprocessed_pseudogene	10.5904	-5.87536	1.34518	-4.36771	1.25558e-05	6.21587e-05
ENSG00000237722	MTND1P29	MT-ND1 pseudogene 29 [Source:HGNC Symbol;Acc:HGNC:42078]	unprocessed_pseudogene	5.43207	3.30598	1.23184	2.68377	0.00727975	0.0223556
ENSG00000237738	RNF216-IT1	RNF216 intronic transcript 1 [Source:HGNC Symbol;Acc:HGNC:41463]	lncRNA	6.12481	6.06434	1.43502	4.22595	2.37936e-05	0.000113882
ENSG00000237819	CDK6-AS1	CDK6 antisense RNA 1 [Source:HGNC Symbol;Acc:HGNC:40141]	lncRNA	17.8998	-2.63422	0.619927	-4.24925	2.14486e-05	0.000103241
ENSG00000237877	LINC01473	long intergenic non-protein coding RNA 1473 [Source:HGNC Symbol;Acc:HGNC:51109]	lncRNA	6.30676	-3.55122	1.15307	-3.07979	0.00207146	0.0071989
ENSG00000237887	RPL23AP32	ribosomal protein L23a pseudogene 32 [Source:HGNC Symbol;Acc:HGNC:25345]	processed_pseudogene	14.4203	3.7552	0.807684	4.64934	3.32997e-06	1.76457e-05
ENSG00000237892	KLF7-IT1	KLF7 intronic transcript 1 [Source:HGNC Symbol;Acc:HGNC:41355]	lncRNA	43.1226	3.16793	0.45964	6.89219	5.49414e-12	4.78564e-11
ENSG00000237940	LINC01238	long intergenic non-protein coding RNA 1238 [Source:HGNC Symbol;Acc:HGNC:49795]	lncRNA,retained_intron	28.1545	-2.8348	0.491499	-5.76767	8.03757e-09	5.56692e-08
ENSG00000238133	MAP3K20-AS1	MAP3K20 antisense RNA 1 [Source:HGNC Symbol;Acc:HGNC:27935]	lncRNA	15.1451	-2.12229	0.727816	-2.91596	0.00354593	0.0117207
ENSG00000238198	LRIG2-DT	LRIG2 divergent transcript [Source:HGNC Symbol;Acc:HGNC:54312]	lncRNA	11.4649	-2.10959	0.716398	-2.94472	0.00323248	0.0107767
ENSG00000238199	UBE2V2P3	ubiquitin conjugating enzyme E2 V2 pseudogene 3 [Source:HGNC Symbol;Acc:HGNC:44891]	processed_pseudogene	10.1215	2.027	0.756622	2.67901	0.00738392	0.0226437
ENSG00000238207		novel transcript	lncRNA	24.6267	2.23787	0.583182	3.83734	0.000124372	0.000536547
ENSG00000238963	U8	U8 small nucleolar RNA [Source:RFAM;Acc:RF00096]	snoRNA	3.29228	4.13429	1.62861	2.53854	0.0111316	0.0325561
ENSG00000239218	RPS20P22	ribosomal protein S20 pseudogene 22 [Source:HGNC Symbol;Acc:HGNC:36379]	processed_transcript,transcribed_processed_pseudogene	72.5374	3.61641	0.35593	10.1604	2.97729e-24	4.85856e-23
ENSG00000239377	ZNF775-AS1	ZNF775 antisense RNA 1 [Source:HGNC Symbol;Acc:HGNC:41202]	lncRNA	5.77139	5.97945	1.45841	4.09997	4.132e-05	0.000191008
ENSG00000239437	RN7SL752P	RNA, 7SL, cytoplasmic 752, pseudogene [Source:HGNC Symbol;Acc:HGNC:46768]	misc_RNA	3.81986	5.38246	1.57487	3.41772	0.000631488	0.00241268
ENSG00000239462		novel transcript	lncRNA	59.2321	1.76975	0.298853	5.9218	3.18436e-09	2.28635e-08
ENSG00000239498		novel transcript	lncRNA	12.9593	-5.25797	1.19137	-4.41339	1.01765e-05	5.09324e-05
ENSG00000239503	MARK2P8	microtubule affinity regulating kinase 2 pseudogene 8 [Source:HGNC Symbol;Acc:HGNC:39799]	processed_pseudogene	28.1133	5.37175	0.813606	6.60239	4.04577e-11	3.33403e-10
ENSG00000239542	RN7SL399P	RNA, 7SL, cytoplasmic 399, pseudogene [Source:HGNC Symbol;Acc:HGNC:46415]	misc_RNA	4.10878	4.46931	1.5424	2.89763	0.00375998	0.0123694
ENSG00000239557	PPP2R5CP	protein phosphatase 2 regulatory subunit B'gamma pseudogene [Source:HGNC Symbol;Acc:HGNC:17835]	processed_pseudogene	7.29078	-2.97132	0.967884	-3.06991	0.0021412	0.00741849
ENSG00000239808	RN7SL255P	RNA, 7SL, cytoplasmic 255, pseudogene [Source:HGNC Symbol;Acc:HGNC:46271]	misc_RNA	8.76739	-4.67217	1.24728	-3.7459	0.00017975	0.000753887
ENSG00000239944	TRBV8-2	T cell receptor beta variable 8-2 (pseudogene) [Source:HGNC Symbol;Acc:HGNC:12245]	TR_V_pseudogene	12.7165	1.92472	0.674003	2.85566	0.00429479	0.0139308
ENSG00000240065	PSMB9	proteasome 20S subunit beta 9 [Source:HGNC Symbol;Acc:HGNC:9546]	protein_coding,retained_intron	372.375	1.6043	0.126128	12.7196	4.60294e-37	1.14288e-35
ENSG00000240086		novel transcript, antisense to EPHB1	lncRNA	40.8678	-1.55252	0.399893	-3.88234	0.000103455	0.000451021
ENSG00000240163	RPL36AP44	ribosomal protein L36a pseudogene 44 [Source:HGNC Symbol;Acc:HGNC:36986]	processed_pseudogene	35.6577	2.73906	0.452782	6.0494	1.45383e-09	1.07698e-08
ENSG00000240244	GAPDHP33	glyceraldehyde 3 phosphate dehydrogenase pseudogene 33 [Source:HGNC Symbol;Acc:HGNC:37785]	processed_pseudogene	5.76264	4.03631	1.31178	3.07697	0.00209115	0.0072607
ENSG00000240436	RPL35AP14	ribosomal protein L35a pseudogene 14 [Source:HGNC Symbol;Acc:HGNC:36783]	processed_pseudogene	2.96258	5.01781	1.67323	2.99887	0.00270981	0.00919772
ENSG00000240602	AADACP1	arylacetamide deacetylase pseudogene 1 [Source:HGNC Symbol;Acc:HGNC:50305]	transcribed_unprocessed_pseudogene	36.0043	2.58787	0.458459	5.64472	1.65453e-08	1.11512e-07
ENSG00000240687		novel transcript	lncRNA	22.1868	2.34764	0.546031	4.29946	1.71217e-05	8.34252e-05
ENSG00000240922	LSAMP-AS1	LSAMP antisense RNA 1 [Source:HGNC Symbol;Acc:HGNC:40350]	lncRNA	4.80961	-4.70851	1.49512	-3.14924	0.00163696	0.00579696
ENSG00000240964	RN7SL751P	RNA, 7SL, cytoplasmic 751, pseudogene [Source:HGNC Symbol;Acc:HGNC:46767]	misc_RNA	19.883	3.45857	0.642957	5.37916	7.48325e-08	4.75126e-07
ENSG00000241157	RPL32P32	ribosomal protein L32 pseudogene 32 [Source:HGNC Symbol;Acc:HGNC:36024]	processed_pseudogene	23.8742	-1.64446	0.473131	-3.47569	0.000509542	0.00198119
ENSG00000241158	ADAMTS9-AS1	ADAMTS9 antisense RNA 1 [Source:HGNC Symbol;Acc:HGNC:40625]	lncRNA	8.81943	3.62181	1.0111	3.58206	0.00034089	0.00136718
ENSG00000241211	IQCJ-SCHIP1-AS1	IQCJ-SCHIP1 readthrough antisense RNA 1 [Source:HGNC Symbol;Acc:HGNC:41303]	lncRNA	31.2279	3.63831	0.550132	6.61353	3.7526e-11	3.10163e-10
ENSG00000241229	RN7SL443P	RNA, 7SL, cytoplasmic 443, pseudogene [Source:HGNC Symbol;Acc:HGNC:46459]	misc_RNA	7.72688	6.40106	1.39482	4.58916	4.45035e-06	2.32045e-05
ENSG00000241278	ENPP7P4	ectonucleotide pyrophosphatase/phosphodiesterase 7 pseudogene 4 [Source:HGNC Symbol;Acc:HGNC:48687]	transcribed_unprocessed_pseudogene	21.6891	1.74891	0.504146	3.46906	0.000522287	0.00202636
ENSG00000241280		novel transcript	lncRNA	19.0681	1.70619	0.545714	3.12652	0.00176889	0.00622452
ENSG00000241316	SUCLG2-DT	SUCLG2 divergent transcript [Source:HGNC Symbol;Acc:HGNC:49643]	lncRNA	103.702	-1.57092	0.223894	-7.01636	2.2773e-12	2.04003e-11
ENSG00000241472	PTPRG-AS1	PTPRG antisense RNA 1 [Source:HGNC Symbol;Acc:HGNC:44638]	lncRNA,retained_intron	11.7462	-2.02951	0.698708	-2.90466	0.00367656	0.0121249
ENSG00000241484	ARHGAP8	Rho GTPase activating protein 8 [Source:HGNC Symbol;Acc:HGNC:677]	nonsense_mediated_decay,protein_coding,protein_coding_CDS_not_defined,retained_intron	8.13554	-2.14949	0.846898	-2.53808	0.0111463	0.0325924
ENSG00000241644	INMT	indolethylamine N-methyltransferase [Source:HGNC Symbol;Acc:HGNC:6069]	protein_coding,protein_coding_CDS_not_defined	25.376	1.59412	0.531075	3.00169	0.00268487	0.00911813
ENSG00000241749	RPSAP52	ribosomal protein SA pseudogene 52 [Source:HGNC Symbol;Acc:HGNC:35752]	processed_transcript,TEC,transcribed_processed_pseudogene	140.929	-2.12317	0.206868	-10.2634	1.03007e-24	1.71016e-23
ENSG00000242021		novel transcript	lncRNA	11.2774	-3.99683	0.961021	-4.15895	3.1972e-05	0.000149785
ENSG00000242082	SLC5A4-AS1	SLC5A4 antisense RNA 1 [Source:HGNC Symbol;Acc:HGNC:53163]	lncRNA	19.8878	-1.86524	0.547317	-3.40797	0.000654493	0.00249309
ENSG00000242094	FOXP1-IT1	FOXP1 intronic transcript 1 [Source:HGNC Symbol;Acc:HGNC:41335]	lncRNA	22.7679	2.55194	0.525061	4.86028	1.17222e-06	6.54289e-06
ENSG00000242221	PSG2	pregnancy specific beta-1-glycoprotein 2 [Source:HGNC Symbol;Acc:HGNC:9519]	protein_coding,protein_coding_CDS_not_defined	2.33346	4.6707	1.80421	2.58878	0.00963155	0.0286761
ENSG00000242252	BGLAP	bone gamma-carboxyglutamate protein [Source:HGNC Symbol;Acc:HGNC:1043]	protein_coding,retained_intron	2.97069	3.97713	1.63981	2.42536	0.0152932	0.0431414
ENSG00000242795		novel transcript	lncRNA	8.62403	4.64073	1.23566	3.75567	0.000172882	0.000727441
ENSG00000242808	SOX2-OT	SOX2 overlapping transcript [Source:HGNC Symbol;Acc:HGNC:20209]	lncRNA	50.6632	-2.22747	0.355717	-6.26193	3.80248e-10	2.93715e-09
ENSG00000242829	RPS26P21	ribosomal protein S26 pseudogene 21 [Source:HGNC Symbol;Acc:HGNC:36469]	processed_pseudogene	55.5622	1.81705	0.324677	5.59649	2.18739e-08	1.45787e-07
ENSG00000242853	RN7SL749P	RNA, 7SL, cytoplasmic 749, pseudogene [Source:HGNC Symbol;Acc:HGNC:46765]	misc_RNA	38.3226	3.56503	0.467222	7.63028	2.34253e-14	2.37477e-13
ENSG00000242931	RPL7P49	ribosomal protein L7 pseudogene 49 [Source:HGNC Symbol;Acc:HGNC:36912]	processed_pseudogene	4.28604	3.577	1.41419	2.52937	0.0114268	0.0333358
ENSG00000243155		novel transcript	lncRNA	19.0757	-1.93185	0.564237	-3.42382	0.000617469	0.00236414
ENSG00000243368	MCCC1-AS1	MCCC1 antisense RNA 1 [Source:HGNC Symbol;Acc:HGNC:40366]	lncRNA	4.13288	-4.48216	1.54743	-2.89652	0.00377331	0.0124079
ENSG00000243389		novel transcript	lncRNA	9.92518	-1.86027	0.747465	-2.48877	0.0128185	0.0368509
ENSG00000243819	RN7SL832P	RNA, 7SL, cytoplasmic 832, pseudogene [Source:HGNC Symbol;Acc:HGNC:46848]	lncRNA	52.1946	-1.76108	0.32026	-5.49889	3.82195e-08	2.49505e-07
ENSG00000243854	RN7SL67P	RNA, 7SL, cytoplasmic 67, pseudogene [Source:HGNC Symbol;Acc:HGNC:46083]	misc_RNA	5.29308	3.90648	1.36753	2.8566	0.00428206	0.013894
ENSG00000243870	RN7SL236P	RNA, 7SL, cytoplasmic 236, pseudogene [Source:HGNC Symbol;Acc:HGNC:46252]	misc_RNA	9.62675	2.26946	0.855103	2.65402	0.00795393	0.0241734
ENSG00000243927	MRPS6	mitochondrial ribosomal protein S6 [Source:HGNC Symbol;Acc:HGNC:14051]	protein_coding,protein_coding_CDS_not_defined,retained_intron	745.397	-1.96423	0.0949002	-20.6978	3.62489e-95	2.48419e-93
ENSG00000244219	TMEM225B	transmembrane protein 225B [Source:HGNC Symbol;Acc:HGNC:53075]	protein_coding,protein_coding_CDS_not_defined	10.4509	-2.41418	0.791079	-3.05175	0.0022751	0.00783709
ENSG00000244286	ITGB5-AS1	ITGB5 antisense RNA 1 [Source:HGNC Symbol;Acc:HGNC:40309]	lncRNA	8.61287	4.64053	1.23314	3.76317	0.000167775	0.000707806
ENSG00000244300	GATA2-AS1	GATA2 antisense RNA 1 [Source:HGNC Symbol;Acc:HGNC:51108]	lncRNA	13.0833	3.36147	0.771703	4.35591	1.32516e-05	6.54442e-05
ENSG00000244342	LINC00698	long intergenic non-protein coding RNA 698 [Source:HGNC Symbol;Acc:HGNC:27720]	lncRNA	6.78121	-3.67145	1.14706	-3.20074	0.00137076	0.00492852
ENSG00000244414	CFHR1	complement factor H related 1 [Source:HGNC Symbol;Acc:HGNC:4888]	protein_coding,protein_coding_CDS_not_defined,retained_intron	3.3343	-5.19082	1.71974	-3.01838	0.00254132	0.00866493
ENSG00000244482	LILRA6	leukocyte immunoglobulin like receptor A6 [Source:HGNC Symbol;Acc:HGNC:15495]	nonsense_mediated_decay,protein_coding,retained_intron	36.3456	-3.8827	0.533829	-7.2733	3.50799e-13	3.32884e-12
ENSG00000244556	ODCP	ornithine decarboxylase pseudogene [Source:HGNC Symbol;Acc:HGNC:8110]	processed_pseudogene	16.3883	2.07134	0.581428	3.5625	0.000367345	0.00146502
ENSG00000244752	CRYBB2	crystallin beta B2 [Source:HGNC Symbol;Acc:HGNC:2398]	protein_coding	7.98114	-2.3341	0.963987	-2.42129	0.0154654	0.0435707
ENSG00000245685	FRG1-DT	FRG1 divergent transcript [Source:HGNC Symbol;Acc:HGNC:51590]	lncRNA	88.8846	-1.79927	0.261569	-6.87876	6.03775e-12	5.23825e-11
ENSG00000245832	MIR4300HG	MIR4300 host gene [Source:HGNC Symbol;Acc:HGNC:52003]	lncRNA	29.6478	1.65757	0.4367	3.79567	0.000147242	0.000626631
ENSG00000245954	LINC02273	long intergenic non-protein coding RNA 2273 [Source:HGNC Symbol;Acc:HGNC:53188]	lncRNA	5.44642	3.94919	1.3183	2.99567	0.00273841	0.00928243
ENSG00000247498	GPRC5D-AS1	GPRC5D and HEBP1 antisense RNA 1 [Source:HGNC Symbol;Acc:HGNC:53599]	lncRNA	111.152	-1.54151	0.217456	-7.08885	1.35227e-12	1.23196e-11
ENSG00000248221	STX18-IT1	STX18 intronic transcript 1 [Source:HGNC Symbol;Acc:HGNC:41415]	lncRNA	1.99026	4.44221	1.87689	2.36679	0.017943	0.0495419
ENSG00000248265	FLJ12825	uncharacterized LOC440101 [Source:NCBI gene (formerly Entrezgene);Acc:440101]	lncRNA	51.1746	-1.72548	0.326232	-5.28914	1.22896e-07	7.62392e-07
ENSG00000248318		novel transcript	lncRNA	10.2252	4.90132	1.20238	4.07634	4.57493e-05	0.000209896
ENSG00000248424	OR51K1P	olfactory receptor family 51 subfamily K member 1 pseudogene [Source:HGNC Symbol;Acc:HGNC:15202]	unprocessed_pseudogene	2.49413	4.76723	1.75667	2.71379	0.00665176	0.0206449
ENSG00000248503	C4orf46P2	C4orf46 pseudogene 2 [Source:HGNC Symbol;Acc:HGNC:55883]	processed_transcript,transcribed_processed_pseudogene	65.9502	2.83167	0.316082	8.95867	3.28619e-19	4.26508e-18
ENSG00000248551		novel transcript	lncRNA	2.46114	4.75072	1.84221	2.57882	0.00991375	0.0293931
ENSG00000248608		inositol-3-phosphate synthase 1 (ISYNA1) pseudogene	processed_pseudogene	27.9767	-2.10413	0.483471	-4.35212	1.34825e-05	6.65419e-05
ENSG00000248610	HSPA8P4	heat shock protein family A (Hsp70) member 8 pseudogene 4 [Source:HGNC Symbol;Acc:HGNC:44919]	processed_pseudogene	6.81084	-4.28929	1.27475	-3.3648	0.000765998	0.00288512
ENSG00000248668	OXCT1-AS1	OXCT1 antisense RNA 1 [Source:HGNC Symbol;Acc:HGNC:40423]	lncRNA,retained_intron	19.358	-2.19848	0.575871	-3.81766	0.000134722	0.000577449
ENSG00000248698	LINC01085	long intergenic non-protein coding RNA 1085 [Source:HGNC Symbol;Acc:HGNC:27198]	processed_transcript,transcribed_processed_pseudogene	14.7404	2.68035	0.659212	4.06598	4.78302e-05	0.00021885
ENSG00000248711	THUMPD3P1	THUMP domain containing 3 pseudogene 1 [Source:HGNC Symbol;Acc:HGNC:50793]	unprocessed_pseudogene	3.80005	5.37612	1.5753	3.41275	0.0006431	0.00245459
ENSG00000248713	C4orf54	chromosome 4 open reading frame 54 [Source:HGNC Symbol;Acc:HGNC:27741]	protein_coding	38.3033	1.50676	0.409767	3.67712	0.000235882	0.000971792
ENSG00000248896		novel transcript, antisense to SOX7 and PINX1	lncRNA	75.8118	4.17493	0.397001	10.5162	7.2768e-26	1.26229e-24
ENSG00000248905	FMN1	formin 1 [Source:HGNC Symbol;Acc:HGNC:3768]	protein_coding,protein_coding_CDS_not_defined,retained_intron	1469.05	-1.68144	0.0800364	-21.0085	5.48546e-98	3.87213e-96
ENSG00000248909	HMGB1P21	high mobility group box 1 pseudogene 21 [Source:HGNC Symbol;Acc:HGNC:39106]	processed_pseudogene	9.71793	2.28106	0.783753	2.91043	0.00360933	0.0119161
ENSG00000248925	PDCD6-DT	PDCD6 divergent transcript [Source:HGNC Symbol;Acc:HGNC:55580]	lncRNA	10.4252	-1.94747	0.746176	-2.60993	0.00905614	0.027164
ENSG00000248927		novel transcript	lncRNA	82.4671	-4.66162	0.415511	-11.219	3.28935e-29	6.42421e-28
ENSG00000248936		putatitive novel transcript	lncRNA	8.27867	-2.62318	0.868565	-3.02013	0.00252667	0.008623
ENSG00000248994		novel transcript	lncRNA	3.78498	4.34506	1.56201	2.78172	0.00540724	0.0171516
ENSG00000249012		trypsin domain contaiing protein pseudogene	unprocessed_pseudogene	5.25883	5.846	1.48612	3.93372	8.36403e-05	0.000370073
ENSG00000249082	EPIST	esophagus epithelial intergenic associated transcript [Source:HGNC Symbol;Acc:HGNC:49679]	lncRNA	1.99116	4.44275	1.86299	2.38475	0.0170909	0.0475025
ENSG00000249212	ATP1B1P1	ATPase Na+/K+ transporting subunit beta 1 pseudogene 1 [Source:HGNC Symbol;Acc:HGNC:809]	unprocessed_pseudogene	12.2527	1.96691	0.741846	2.65137	0.00801668	0.0243422
ENSG00000249304		novel transcript	lncRNA	46.2889	2.45511	0.37939	6.4712	9.72299e-11	7.83711e-10
ENSG00000249395	CASC9	cancer susceptibility 9 [Source:HGNC Symbol;Acc:HGNC:48906]	lncRNA,retained_intron	132.185	-1.86758	0.21589	-8.6506	5.12297e-18	6.31895e-17
ENSG00000249661	TNRC18P1	trinucleotide repeat containing 18 pseudogene 1 [Source:HGNC Symbol;Acc:HGNC:43881]	processed_pseudogene	17.5346	2.59711	0.623849	4.16304	3.14044e-05	0.000147288
ENSG00000249669	CARMN	cardiac mesoderm enhancer-associated non-coding RNA [Source:HGNC Symbol;Acc:HGNC:42872]	lncRNA	20.6836	-1.7995	0.545303	-3.29999	0.00096688	0.00357175
ENSG00000249690		novel transcript, antisense to LRBA	lncRNA	2.48722	4.76383	1.74676	2.72724	0.0063866	0.0199231
ENSG00000249715	FER1L5	fer-1 like family member 5 [Source:HGNC Symbol;Acc:HGNC:19044]	protein_coding,retained_intron	62.6929	2.08959	0.314958	6.6345	3.25595e-11	2.70136e-10
ENSG00000249743		novel transcript	lncRNA	72.8579	-2.81301	0.32023	-8.78433	1.57302e-18	1.97939e-17
ENSG00000249767	ENPP7P10	ectonucleotide pyrophosphatase/phosphodiesterase 7 pseudogene 10 [Source:HGNC Symbol;Acc:HGNC:48693]	unprocessed_pseudogene	9.90296	3.16438	0.880991	3.59184	0.000328347	0.00131948
ENSG00000249850	KRT18P31	keratin 18 pseudogene 31 [Source:HGNC Symbol;Acc:HGNC:33400]	processed_pseudogene	111.862	4.32875	0.320838	13.492	1.74225e-41	4.85433e-40
ENSG00000249852		TEC	TEC	6.13683	6.06673	1.43609	4.22447	2.39499e-05	0.000114594
ENSG00000249859	PVT1	Pvt1 oncogene [Source:HGNC Symbol;Acc:HGNC:9709]	lncRNA	2947.86	1.76233	0.0540251	32.6205	2.09937e-233	5.67852e-231
ENSG00000249937	LINC02223	long intergenic non-protein coding RNA 2223 [Source:HGNC Symbol;Acc:HGNC:53092]	lncRNA	14.2284	-2.25089	0.645984	-3.48444	0.000493165	0.00192314
ENSG00000249955		novel transcript	lncRNA	2.99709	5.032	1.68444	2.98734	0.00281412	0.00951267
ENSG00000250020		Spi-C transcription factor (Spi-1/PU.1 related) (SPIC) pseudogene	processed_pseudogene	19.0582	2.1556	0.601789	3.58198	0.000340993	0.00136742
ENSG00000250049		novel transcript	lncRNA	9.94108	-2.1566	0.79351	-2.71779	0.00657186	0.0204343
ENSG00000250271		arylacetamide deacetylase (esterase) (AADAC) pseudogene	transcribed_unprocessed_pseudogene	6.65399	2.50375	0.965599	2.59296	0.00951551	0.0283859
ENSG00000250284		novel transcript	lncRNA	25.7308	-4.90997	0.759338	-6.46612	1.00552e-10	8.08993e-10
ENSG00000250423	KIAA1210	KIAA1210 [Source:HGNC Symbol;Acc:HGNC:29218]	protein_coding	580.509	-2.04978	0.13547	-15.1309	1.01328e-51	3.49953e-50
ENSG00000250483	PPM1AP1	protein phosphatase, Mg2+/Mn2+ dependent 1A pseudogene 1 [Source:HGNC Symbol;Acc:HGNC:30175]	processed_pseudogene	8.61087	-4.65053	1.24468	-3.73631	0.000186737	0.000780797
ENSG00000250614		novel transcript, antisense to DTX2	lncRNA	8.57962	2.05986	0.811898	2.53709	0.0111777	0.0326717
ENSG00000250673	REELD1	reeler domain containing 1 [Source:HGNC Symbol;Acc:HGNC:53638]	nonsense_mediated_decay,protein_coding,protein_coding_CDS_not_defined	8.40284	3.99139	1.10148	3.62367	0.000290454	0.00117789
ENSG00000250954		novel transcript	lncRNA	6.46151	-6.14645	1.43921	-4.27072	1.94846e-05	9.42768e-05
ENSG00000250995	TMEM30BP1	TMEM30B pseudogene 1 [Source:HGNC Symbol;Acc:HGNC:55058]	processed_pseudogene	9.93313	1.71345	0.719111	2.38274	0.0171844	0.0477232
ENSG00000251011	TMEM108-AS1	TMEM108 antisense RNA 1 [Source:HGNC Symbol;Acc:HGNC:50307]	lncRNA	151.268	2.57645	0.212168	12.1434	6.21623e-34	1.41158e-32
ENSG00000251056	ANKRD20A17P	ankyrin repeat domain 20 family member A17, pseudogene [Source:HGNC Symbol;Acc:HGNC:43608]	unprocessed_pseudogene	3.98513	-3.46268	1.44062	-2.40361	0.0162342	0.0454644
ENSG00000251129	LINC02506	long intergenic non-protein coding RNA 2506 [Source:HGNC Symbol;Acc:HGNC:53495]	lncRNA	531.192	-1.66411	0.107155	-15.53	2.17341e-54	7.88023e-53
ENSG00000251194		novel transcript	lncRNA	18.2167	2.54874	0.611465	4.16825	3.06949e-05	0.000144159
ENSG00000251199		novel transcript	lncRNA	13.4116	2.25244	0.673311	3.34532	0.000821877	0.003077
ENSG00000251271	ALG1L7P	ALG1 like 7, pseudogene [Source:HGNC Symbol;Acc:HGNC:44376]	unprocessed_pseudogene	19.3268	1.87436	0.599471	3.1267	0.00176782	0.00622219
ENSG00000251333	RTN3P1	reticulon 3 pseudogene 1 [Source:HGNC Symbol;Acc:HGNC:19212]	processed_pseudogene	14.2569	-2.02277	0.621338	-3.2555	0.00113194	0.00413157
ENSG00000251361		novel transcript	lncRNA	63.0009	-3.30627	0.356492	-9.27446	1.78525e-20	2.47129e-19
ENSG00000251539	SNX18P24	sorting nexin 18 pseudogene 24 [Source:HGNC Symbol;Acc:HGNC:39632]	processed_pseudogene	12.6223	-2.27867	0.745049	-3.05842	0.00222504	0.00768458
ENSG00000251637	LINC02754	long intergenic non-protein coding RNA 2754 [Source:HGNC Symbol;Acc:HGNC:54274]	lncRNA	10.0936	2.35385	0.866466	2.7166	0.00659557	0.0204998
ENSG00000251682		DEAD (Asp-Glu-Ala-Asp) box polypeptide 25 (DDX25) pseudogene	processed_pseudogene	12.0808	3.02129	0.784215	3.85263	0.000116856	0.000505547
ENSG00000252498	RNU6-1016P	RNA, U6 small nuclear 1016, pseudogene [Source:HGNC Symbol;Acc:HGNC:47979]	snRNA	15.3691	2.16074	0.69621	3.10358	0.00191197	0.00669231
ENSG00000252612	Y_RNA	Y RNA [Source:RFAM;Acc:RF00019]	misc_RNA	2.16231	4.56119	1.82375	2.50099	0.0123846	0.0357506
ENSG00000252904			snoRNA	2.14761	4.55286	1.81743	2.50511	0.0122414	0.0354316
ENSG00000252985	SNORD116	Small nucleolar RNA SNORD116 [Source:RFAM;Acc:RF00108]	snoRNA	3.79524	4.34796	1.55437	2.79725	0.00515394	0.0164214
ENSG00000253103	LINC01609	long intergenic non-protein coding RNA 1609 [Source:HGNC Symbol;Acc:HGNC:51663]	lncRNA	14.05	-2.6158	0.703296	-3.71935	0.000199738	0.000830612
ENSG00000253111		novel transcript	lncRNA	8.95101	3.29547	0.951618	3.46301	0.00053416	0.00206771
ENSG00000253112		novel transcript	lncRNA	5.46002	5.8987	1.47833	3.99011	6.60433e-05	0.000296245
ENSG00000253168		novel transcript	lncRNA	6.77309	4.27664	1.2939	3.30523	0.000948983	0.00351073
ENSG00000253217		novel transcript	lncRNA	3.78208	4.34443	1.57435	2.75951	0.00578879	0.0182181
ENSG00000253279	LINC02209	long intergenic non-protein coding RNA 2209 [Source:HGNC Symbol;Acc:HGNC:27827]	lncRNA	1.98426	4.43851	1.85905	2.38752	0.0169625	0.0472014
ENSG00000253284		novel transcript	lncRNA	36.6019	2.17583	0.397854	5.4689	4.52831e-08	2.93984e-07
ENSG00000253288		novel transcript	lncRNA	230.727	-1.57661	0.157727	-9.99582	1.58961e-23	2.5398e-22
ENSG00000253298	LINC01845	long intergenic non-protein coding RNA 1845 [Source:HGNC Symbol;Acc:HGNC:27747]	lncRNA	22.4941	2.36899	0.538943	4.39563	1.10453e-05	5.50749e-05
ENSG00000253307		novel transcript	lncRNA	37.2839	2.11804	0.427311	4.95668	7.17063e-07	4.09511e-06
ENSG00000253357		novel transcript	lncRNA	52.4618	-1.52461	0.324549	-4.69761	2.63221e-06	1.4137e-05
ENSG00000253372		novel transcript	lncRNA	62.7377	5.20366	0.521552	9.97726	1.91681e-23	3.05143e-22
ENSG00000253399		novel transcript	lncRNA	3.29202	4.13411	1.65435	2.49893	0.0124568	0.035936
ENSG00000253485	PCDHGA5	protocadherin gamma subfamily A, 5 [Source:HGNC Symbol;Acc:HGNC:8703]	protein_coding	34.7002	-1.55598	0.44772	-3.47534	0.0005102	0.00198325
ENSG00000253516	HMGB1P41	high mobility group box 1 pseudogene 41 [Source:HGNC Symbol;Acc:HGNC:39188]	processed_pseudogene	256.966	4.58825	0.535421	8.56943	1.03999e-17	1.26693e-16
ENSG00000253584		novel transcript	lncRNA	9.437	-4.1796	1.07208	-3.89858	9.6758e-05	0.000423758
ENSG00000253591	KCNIP1-AS1	KCNIP1 antisense RNA 1 [Source:HGNC Symbol;Acc:HGNC:40710]	lncRNA	10.4213	-1.81411	0.719649	-2.52082	0.0117081	0.0340753
ENSG00000253598	SLC10A5	solute carrier family 10 member 5 [Source:HGNC Symbol;Acc:HGNC:22981]	protein_coding	31.2465	1.55135	0.421905	3.67702	0.000235977	0.000972054
ENSG00000253616		novel transcript	lncRNA	43.0826	1.86437	0.37891	4.92035	8.63896e-07	4.88981e-06
ENSG00000253642		novel transcript	lncRNA	92.1706	-1.90925	0.257192	-7.42342	1.14133e-13	1.1071e-12
ENSG00000253661	ZFHX4-AS1	ZFHX4 antisense RNA 1 [Source:HGNC Symbol;Acc:HGNC:44165]	lncRNA	28.8166	-2.5815	0.474251	-5.44332	5.22976e-08	3.3716e-07
ENSG00000253666		novel transcript	lncRNA	7.2675	2.16147	0.87784	2.46226	0.0138065	0.0393725
ENSG00000253741	LNCOC1	lncRNA associated with ovarian cancer 1 [Source:HGNC Symbol;Acc:HGNC:53947]	lncRNA	200.078	1.66704	0.174997	9.52611	1.63286e-21	2.37886e-20
ENSG00000253746		novel transcript	lncRNA	35.1252	-1.7775	0.391988	-4.53457	5.77206e-06	2.97059e-05
ENSG00000253775		novel transcript	lncRNA	3.82376	4.35827	1.56781	2.77985	0.00543836	0.0172352
ENSG00000253796		novel transcript	lncRNA	5.2758	3.26653	1.20696	2.70642	0.00680132	0.0210599
ENSG00000253802	SIRLNT	SIRT1 regulating lncRNA tumor promoter [Source:HGNC Symbol;Acc:HGNC:53902]	lncRNA	74.7916	3.03586	0.32906	9.22584	2.81347e-20	3.85103e-19
ENSG00000253807	LINC01170	long intergenic non-protein coding RNA 1170 [Source:HGNC Symbol;Acc:HGNC:49542]	lncRNA	4.47266	-4.60042	1.52377	-3.01909	0.00253532	0.00864963
ENSG00000253819	LINC01151	long intergenic non-protein coding RNA 1151 [Source:HGNC Symbol;Acc:HGNC:49471]	lncRNA	72.1143	2.56123	0.30755	8.32785	8.23261e-17	9.56767e-16
ENSG00000253824		novel transcript	lncRNA	15.0904	3.01173	0.765549	3.93408	8.35153e-05	0.000369627
ENSG00000253842		novel transcript	lncRNA	4.84408	5.72412	1.53226	3.73574	0.000187165	0.00078237
ENSG00000253846	PCDHGA10	protocadherin gamma subfamily A, 10 [Source:HGNC Symbol;Acc:HGNC:8697]	protein_coding	74.0104	-1.50158	0.270845	-5.54406	2.9553e-08	1.94926e-07
ENSG00000253908		zinc finger protein pseudogene	processed_pseudogene	12.721	2.16433	0.661287	3.2729	0.0010645	0.00390266
ENSG00000253915	MAPRE1P1	MAPRE1 pseudogene 1 [Source:HGNC Symbol;Acc:HGNC:29624]	processed_pseudogene	7.79193	2.07963	0.866228	2.40079	0.0163596	0.0457612
ENSG00000253966		tubulin, epsilon 1 (TUBE1) pseudogene	processed_pseudogene	20.8613	2.40603	0.5597	4.29879	1.71736e-05	8.36645e-05
ENSG00000253981	ALG1L13P	ALG1 like 13, pseudogene [Source:HGNC Symbol;Acc:HGNC:44382]	transcribed_unprocessed_pseudogene	9.05748	1.992	0.795805	2.50313	0.0123101	0.0355867
ENSG00000254094		novel transcript	lncRNA	8.50509	3.20725	0.988537	3.24444	0.00117683	0.004283
ENSG00000254162		novel transcript	lncRNA	6.15016	-4.14325	1.32857	-3.11857	0.00181728	0.00638157
ENSG00000254226	LINC01933	long intergenic non-protein coding RNA 1933 [Source:HGNC Symbol;Acc:HGNC:52756]	lncRNA	4.96439	-3.17319	1.22314	-2.59431	0.00947818	0.0282883
ENSG00000254302		novel transcript	lncRNA	32.1599	-5.99857	0.905599	-6.62387	3.49915e-11	2.89842e-10
ENSG00000254415	SIGLEC14	sialic acid binding Ig like lectin 14 [Source:HGNC Symbol;Acc:HGNC:32926]	protein_coding,retained_intron	12.9044	1.63359	0.666882	2.44959	0.0143017	0.0406295
ENSG00000254431		novel transcript	lncRNA	5.12594	3.85399	1.36647	2.82039	0.00479653	0.0153965
ENSG00000254484		novel transcript	lncRNA	2.62449	4.84357	1.78014	2.72089	0.00651066	0.0202708
ENSG00000254527	ENPP7P12	ectonucleotide pyrophosphatase/phosphodiesterase 7 pseudogene 12 [Source:HGNC Symbol;Acc:HGNC:48697]	processed_pseudogene	38.5847	2.54547	0.401908	6.33346	2.3973e-10	1.88026e-09
ENSG00000254528	FXYD6-AS1	FXYD6 antisense RNA 1 [Source:HGNC Symbol;Acc:HGNC:56067]	lncRNA	11.9204	-1.58836	0.655197	-2.42425	0.01534	0.0432567
ENSG00000254550	OMP	olfactory marker protein [Source:HGNC Symbol;Acc:HGNC:8136]	protein_coding	14.3076	3.10603	0.73258	4.23985	2.23667e-05	0.000107406
ENSG00000254750	CASP1P2	caspase 1 pseudogene 2 [Source:HGNC Symbol;Acc:HGNC:43776]	unprocessed_pseudogene	10.6409	-5.8804	1.34623	-4.36806	1.25355e-05	6.20684e-05
ENSG00000254780		Sec61 beta subunit (SEC61B) pseudogene	processed_pseudogene	23.8249	1.69235	0.496898	3.40584	0.00065962	0.00251137
ENSG00000254838	GVINP1	GTPase, very large interferon inducible pseudogene 1 [Source:HGNC Symbol;Acc:HGNC:25813]	transcribed_unprocessed_pseudogene	49.1931	-1.70201	0.350945	-4.84979	1.23595e-06	6.87974e-06
ENSG00000254866	DEFB109D	defensin beta 109D (pseudogene) [Source:HGNC Symbol;Acc:HGNC:30838]	processed_pseudogene	2.31607	4.66149	1.78729	2.60813	0.0091038	0.0272855
ENSG00000254921		novel transcript	lncRNA	3.48983	5.25203	1.62853	3.22502	0.00125963	0.00455736
ENSG00000254985	RSF1-IT2	RSF1 intronic transcript 2 [Source:HGNC Symbol;Acc:HGNC:41438]	lncRNA	14.0508	2.33749	0.646374	3.61631	0.000298833	0.00120914
ENSG00000254995	STX16-NPEPL1	STX16-NPEPL1 readthrough (NMD candidate) [Source:HGNC Symbol;Acc:HGNC:41993]	nonsense_mediated_decay,retained_intron	25.6827	-3.45027	0.567314	-6.08178	1.18859e-09	8.86511e-09
ENSG00000254997	KRTAP5-9	keratin associated protein 5-9 [Source:HGNC Symbol;Acc:HGNC:23604]	protein_coding	4.31383	-3.57491	1.41403	-2.52817	0.011466	0.0334343
ENSG00000255158		novel transcript	lncRNA	22.1595	2.34187	0.59408	3.94202	8.07994e-05	0.000358282
ENSG00000255221	CARD17	caspase recruitment domain family member 17 [Source:HGNC Symbol;Acc:HGNC:33827]	transcribed_unprocessed_pseudogene	4.46811	-5.6145	1.5298	-3.67009	0.000242463	0.000997025
ENSG00000255240		novel transcript	lncRNA	10.1255	-1.88534	0.757894	-2.4876	0.0128607	0.0369512
ENSG00000255247	NECTIN1-AS1	NECTIN1 antisense RNA 1 [Source:HGNC Symbol;Acc:HGNC:54270]	lncRNA	2.81124	4.9411	1.70576	2.89671	0.00377092	0.0124014
ENSG00000255317		novel transcript, antisense to KIRREL3	lncRNA	13.5698	2.03903	0.636013	3.20596	0.00134614	0.00484514
ENSG00000255325		novel transcript	lncRNA	16.0438	2.68938	0.639663	4.20436	2.61818e-05	0.000124301
ENSG00000255389		chromosome 6 open reading frame 3	lncRNA	12.2446	-3.505	0.83673	-4.18892	2.80283e-05	0.000132491
ENSG00000255421		novel transcript	lncRNA	5.29098	4.84605	1.48126	3.27158	0.00106949	0.00391953
ENSG00000255443	CD44-AS1	CD44 antisense RNA 1 [Source:HGNC Symbol;Acc:HGNC:40133]	lncRNA	16.2835	2.58464	0.686703	3.76385	0.000167319	0.00070598
ENSG00000255449		novel transcript, antisense to AAMDC	lncRNA	14.3798	1.83066	0.638423	2.86747	0.0041377	0.0134713
ENSG00000255471	PRSS23-AS1	PRSS23 antisense RNA 1 [Source:HGNC Symbol;Acc:HGNC:56071]	lncRNA	14.1952	1.81233	0.61934	2.92622	0.00343111	0.0113843
ENSG00000255549	ENPP7P6	ectonucleotide pyrophosphatase/phosphodiesterase 7 pseudogene 6 [Source:HGNC Symbol;Acc:HGNC:48698]	transcribed_unprocessed_pseudogene	11.1691	3.98651	0.980304	4.0666	4.7703e-05	0.000218303
ENSG00000255639		novel protein	nonsense_mediated_decay,protein_coding,retained_intron	25.9513	1.84755	0.486003	3.80152	0.000143814	0.000613064
ENSG00000255837	TAS2R20	taste 2 receptor member 20 [Source:HGNC Symbol;Acc:HGNC:19109]	protein_coding	16.8803	-3.56182	0.706971	-5.03814	4.70087e-07	2.73056e-06
ENSG00000255882		novel transcript	lncRNA	58.0627	-1.98739	0.330481	-6.01363	1.81418e-09	1.33166e-08
ENSG00000255893		novel transcript	lncRNA	18.5991	-1.58645	0.57302	-2.76857	0.0056303	0.0177761
ENSG00000255920	CCND2-AS1	CCND2 antisense RNA 1 [Source:HGNC Symbol;Acc:HGNC:49398]	lncRNA,retained_intron	9.10982	-2.01188	0.810695	-2.48167	0.0130768	0.0375157
ENSG00000256039	LINC02446	long intergenic non-protein coding RNA 2446 [Source:HGNC Symbol;Acc:HGNC:53378]	lncRNA	2.31697	4.66196	1.77885	2.62077	0.00877314	0.0264058
ENSG00000256188	TAS2R30	taste 2 receptor member 30 [Source:HGNC Symbol;Acc:HGNC:19112]	protein_coding	6.93977	4.3196	1.3021	3.31741	0.000908572	0.00337266
ENSG00000256218		novel transcript	lncRNA	11.2816	-2.37157	0.768235	-3.08704	0.0020216	0.0070392
ENSG00000256288	LINC02617	long intergenic non-protein coding RNA 2617 [Source:HGNC Symbol;Acc:HGNC:54089]	lncRNA	3.14452	4.06204	1.62019	2.50714	0.0121712	0.0352585
ENSG00000256389		novel transcript	lncRNA	3.97293	-4.42248	1.59075	-2.78013	0.00543376	0.0172249
ENSG00000256682		taste receptor, type 2, member 12 pseudogene	processed_transcript,transcribed_processed_pseudogene	2.32659	-4.67215	1.80223	-2.59243	0.00953015	0.0284101
ENSG00000256705		novel transcript, antisense to PPP2R5C	lncRNA	2.9905	3.98562	1.6723	2.38332	0.0171574	0.0476653
ENSG00000256713	PGA5	pepsinogen A5 [Source:HGNC Symbol;Acc:HGNC:8887]	protein_coding,retained_intron	7.61405	3.39155	1.01895	3.32848	0.000873219	0.00325448
ENSG00000256733	LINC02954	long intergenic non-protein coding RNA 2954 [Source:HGNC Symbol;Acc:HGNC:55972]	lncRNA	32.9583	2.225	0.417267	5.33232	9.69646e-08	6.07943e-07
ENSG00000256981		taste receptor, type 2, member 18 pseudogene	unprocessed_pseudogene	71.4491	2.29309	0.290743	7.88701	3.09502e-15	3.2996e-14
ENSG00000257046	SLCO1B3-SLCO1B7	SLCO1B3-SLCO1B7 readthrough [Source:HGNC Symbol;Acc:HGNC:54403]	protein_coding	3.8024	-4.35704	1.56781	-2.77907	0.00545156	0.0172688
ENSG00000257060		novel transcript	lncRNA	34.5087	-1.77913	0.405386	-4.38873	1.14016e-05	5.67206e-05
ENSG00000257083		novel transcript	lncRNA	8.28164	5.50849	1.36677	4.03031	5.57039e-05	0.000252348
ENSG00000257097	CLIP1-AS1	CLIP1 antisense RNA 1 [Source:HGNC Symbol;Acc:HGNC:48586]	lncRNA	7.74513	2.0692	0.849353	2.4362	0.0148423	0.0420128
ENSG00000257114	LINC02450	long intergenic non-protein coding RNA 2450 [Source:HGNC Symbol;Acc:HGNC:53382]	lncRNA	25.2146	-2.90605	0.645866	-4.49947	6.81227e-06	3.4784e-05
ENSG00000257198	FAM205BP	family with sequence similarity 205 member B, pseudogene [Source:HGNC Symbol;Acc:HGNC:24504]	transcribed_unprocessed_pseudogene	2.62807	4.8454	1.73034	2.80026	0.00510613	0.0162843
ENSG00000257246	PHB1P19	PHB1 pseudogene 19 [Source:HGNC Symbol;Acc:HGNC:51552]	processed_transcript,transcribed_processed_pseudogene	6.618	2.23394	0.921915	2.42315	0.0153867	0.043369
ENSG00000257283		novel transcript, antisense to RRP12	lncRNA	7.83999	-2.77292	1.02934	-2.69389	0.00706244	0.0217802
ENSG00000257467	PPFIA2-AS1	PPFIA2 antisense RNA 1 [Source:HGNC Symbol;Acc:HGNC:53397]	lncRNA	2.98299	-3.98805	1.65361	-2.41172	0.0158775	0.0445716
ENSG00000257524	ST6GALNAC6	ST6 N-acetylgalactosaminide alpha-2,6-sialyltransferase 6 [Source:NCBI gene (formerly Entrezgene);Acc:30815]	nonsense_mediated_decay,protein_coding_CDS_not_defined	14.7018	1.78314	0.614982	2.89949	0.00373765	0.0123018
ENSG00000257534		novel transcript	lncRNA	14.5446	1.85633	0.612401	3.03124	0.00243553	0.00834085
ENSG00000257683	LINC02463	long intergenic non-protein coding RNA 2463 [Source:HGNC Symbol;Acc:HGNC:53400]	lncRNA	3.28839	5.16855	1.63455	3.16206	0.00156659	0.00557166
ENSG00000257813		protein-kinase, interferon-inducible double stranded RNA dependent inhibitor, repressor of (P58 repressor) (PRKRIR) pseudogene	processed_pseudogene	6.63023	-2.50055	0.959852	-2.60514	0.00918366	0.0274979
ENSG00000257923	CUX1	cut like homeobox 1 [Source:HGNC Symbol;Acc:HGNC:2557]	protein_coding,protein_coding_CDS_not_defined,retained_intron	4200.03	-1.8602	0.0597988	-31.1077	1.89713e-212	4.20187e-210
ENSG00000257953		novel transcript, antisense to CTDSP2	lncRNA	14.5415	2.15991	0.68131	3.17023	0.00152319	0.00543056
ENSG00000257954		FGFR1 oncogene partner 2 (FGFR1OP2) pseudogene	processed_pseudogene	39.66	2.49771	0.400273	6.24003	4.37498e-10	3.36321e-09
ENSG00000258010		novel transcript, antisense to ARNT2	lncRNA	3.2857	5.16753	1.63884	3.15317	0.00161509	0.00572748
ENSG00000258028		novel transcript	lncRNA	38.3655	-2.14318	0.412139	-5.20015	1.99126e-07	1.2064e-06
ENSG00000258065		Vac14 homolog (S. cerevisiae) (VAC14) pseudogene	processed_pseudogene	34.247	1.97109	0.407302	4.83939	1.30238e-06	7.23241e-06
ENSG00000258081		novel transcript	lncRNA	56.6274	-1.51347	0.311279	-4.86212	1.16136e-06	6.48464e-06
ENSG00000258090		RWD domain containing 1 (RWDD1) pseudogene	processed_pseudogene	5.28665	3.89977	1.32526	2.94264	0.00325432	0.0108424
ENSG00000258125		novel transcript	lncRNA	3.62141	4.27868	1.57389	2.71853	0.0065572	0.0203908
ENSG00000258177		novel transcript, antisense to ELK3	lncRNA	4.29732	4.53529	1.51726	2.98913	0.0027977	0.0094645
ENSG00000258425		novel transcript, antisense to LTBP2	lncRNA	2.80702	4.93928	1.69051	2.92176	0.00348055	0.0115245
ENSG00000258439		ribosomal protein S2 (RPS2) pseudogene	processed_pseudogene	12.3957	1.99783	0.743426	2.68733	0.00720253	0.0221541
ENSG00000258454		novel transcript, sense overlapping GPATCH2L	lncRNA	4.98343	-4.7612	1.54216	-3.08735	0.00201947	0.0070326
ENSG00000258476	LINC02207	long intergenic non-protein coding RNA 2207 [Source:HGNC Symbol;Acc:HGNC:53073]	lncRNA	30.8576	-2.11597	0.444939	-4.75564	1.9782e-06	1.07798e-05
ENSG00000258512	LINC00239	long intergenic non-protein coding RNA 239 [Source:HGNC Symbol;Acc:HGNC:20119]	lncRNA	38.5401	1.90216	0.389714	4.88092	1.05594e-06	5.92635e-06
ENSG00000258537	FRMD6-AS2	FRMD6 antisense RNA 2 [Source:HGNC Symbol;Acc:HGNC:43637]	lncRNA	6.03902	3.47654	1.24764	2.7865	0.00532801	0.0169266
ENSG00000258539		novel transcript, METTL10-FAM53B readthrough	nonsense_mediated_decay	2.99446	-5.03601	1.69037	-2.97924	0.00288966	0.00974218
ENSG00000258545	RHOXF1-AS1	RHOXF1 antisense RNA 1 [Source:HGNC Symbol;Acc:HGNC:51582]	lncRNA	34.0131	1.6351	0.427407	3.82562	0.000130444	0.000560525
ENSG00000258551	CRAT37	cervical cancer-associated transcript 37 [Source:NCBI gene (formerly Entrezgene);Acc:101926928]	lncRNA	6.42932	5.13557	1.41749	3.623	0.000291203	0.00118061
ENSG00000258583	LINC01500	long intergenic non-protein coding RNA 1500 [Source:HGNC Symbol;Acc:HGNC:51166]	lncRNA	6.43617	2.76306	1.0356	2.66806	0.00762898	0.0233017
ENSG00000258592		novel transcript	lncRNA	46.2538	-1.58178	0.334303	-4.73157	2.22785e-06	1.2082e-05
ENSG00000258602	LINC01629	long intergenic non-protein coding RNA 1629 [Source:HGNC Symbol;Acc:HGNC:52260]	lncRNA	8.12804	3.94225	1.14669	3.43793	0.000586183	0.00225395
ENSG00000258611	YBX2P2	YBX2 pseudogene 2 [Source:HGNC Symbol;Acc:HGNC:54721]	transcribed_processed_pseudogene	13.4654	2.38846	0.680157	3.51163	0.000445369	0.00175091
ENSG00000258620		novel transcript, intronic to WDR25	lncRNA	15.0491	4.8681	0.985455	4.93995	7.81434e-07	4.44612e-06
ENSG00000258733	LINC02328	long intergenic non-protein coding RNA 2328 [Source:HGNC Symbol;Acc:HGNC:53248]	lncRNA	45.9375	-1.9878	0.365393	-5.44016	5.32326e-08	3.4261e-07
ENSG00000258752		novel transcript, antisense to FOXN3	lncRNA	39.7305	6.8933	1.07243	6.42775	1.29504e-10	1.03566e-09
ENSG00000258796		ribosomal L24 domain containing 1 (RSL24D1) pseudogene	processed_pseudogene	3.45775	5.2407	1.60818	3.25879	0.0011189	0.00408545
ENSG00000258824		novel transcript	lncRNA	15.911	-2.1202	0.614771	-3.44877	0.000563148	0.00217002
ENSG00000258875		novel transcript, antisense to GPR68	lncRNA	6.80609	2.85054	1.04601	2.72515	0.0064273	0.0200378
ENSG00000258881		novel protein	nonsense_mediated_decay,protein_coding	139.311	1.63206	0.204516	7.98008	1.46235e-15	1.58612e-14
ENSG00000258897	EGLN3-AS1	EGLN3 antisense RNA 1 [Source:HGNC Symbol;Acc:HGNC:49077]	lncRNA	4.67503	4.65917	1.52545	3.05429	0.00225597	0.0077817
ENSG00000258910	LINC01956	long intergenic non-protein coding RNA 1956 [Source:HGNC Symbol;Acc:HGNC:52777]	lncRNA	13.3978	-2.83713	0.714859	-3.9688	7.22345e-05	0.000322643
ENSG00000258932	MIR3171HG	MIR3171 host gene [Source:HGNC Symbol;Acc:HGNC:56193]	processed_transcript,transcribed_processed_pseudogene	37.2951	-1.77412	0.376274	-4.71497	2.41741e-06	1.3036e-05
ENSG00000258986	TMEM179	transmembrane protein 179 [Source:HGNC Symbol;Acc:HGNC:20137]	protein_coding	24.8406	-1.56848	0.470242	-3.33547	0.000851551	0.00318109
ENSG00000259033		novel transcript	lncRNA	294.818	-1.63342	0.148323	-11.0125	3.32524e-28	6.29715e-27
ENSG00000259070	LINC00639	long intergenic non-protein coding RNA 639 [Source:HGNC Symbol;Acc:HGNC:27502]	lncRNA	209.608	-2.34209	0.184642	-12.6845	7.20865e-37	1.77401e-35
ENSG00000259088		novel transcript, antisense to PPP2R5C	lncRNA	14.8375	1.62177	0.618285	2.62302	0.00871538	0.026263
ENSG00000259120	SMIM6	small integral membrane protein 6 [Source:HGNC Symbol;Acc:HGNC:40032]	protein_coding	20.935	2.49219	0.59587	4.18244	2.88392e-05	0.00013603
ENSG00000259123		novel transcript	lncRNA	6.79715	-2.28638	0.914841	-2.49921	0.0124471	0.0359115
ENSG00000259126		novel transcript	lncRNA	38.2851	-2.34593	0.434761	-5.3959	6.81799e-08	4.34966e-07
ENSG00000259151	CAP2P1	cyclase associated actin cytoskeleton regulatory protein 2 pseudogene 1 [Source:HGNC Symbol;Acc:HGNC:20142]	transcribed_processed_pseudogene	58.4561	5.42903	0.579728	9.3648	7.61928e-21	1.07667e-19
ENSG00000259256	LINC01895	long intergenic non-protein coding RNA 1895 [Source:HGNC Symbol;Acc:HGNC:52714]	lncRNA	4.60474	3.69108	1.38024	2.67424	0.00748995	0.022932
ENSG00000259294		novel transcript, antisense to CUX1	lncRNA	45.6645	4.88092	1.01738	4.79757	1.60605e-06	8.83212e-06
ENSG00000259315	ACTG1P17	actin gamma 1 pseudogene 17 [Source:HGNC Symbol;Acc:HGNC:51497]	processed_transcript,transcribed_processed_pseudogene	10.2255	2.20972	0.831708	2.65684	0.00788763	0.0239886
ENSG00000259341		novel transcript	lncRNA	75.1723	1.87745	0.280739	6.68753	2.26963e-11	1.90215e-10
ENSG00000259354		novel transcript, antisense to SLC30A4	lncRNA	21.7019	1.74873	0.501979	3.48367	0.000494594	0.00192773
ENSG00000259376		novel transcript, antisense to LRRK1	lncRNA	8.79623	-4.67656	1.21807	-3.83933	0.000123372	0.000532458
ENSG00000259392		microtubule-associated protein 1 light chain 3 beta 2 (MAP1LC3B2) pseudogene	transcribed_processed_pseudogene	10.5523	2.42932	0.813341	2.98684	0.00281875	0.00952471
ENSG00000259417	CTXND1	cortexin domain containing 1 [Source:HGNC Symbol;Acc:HGNC:50507]	protein_coding	41.6168	2.57557	0.404451	6.36806	1.91429e-10	1.51346e-09
ENSG00000259440	NPM1P43	nucleophosmin 1 pseudogene 43 [Source:HGNC Symbol;Acc:HGNC:45222]	processed_pseudogene	2.62117	4.84212	1.74957	2.7676	0.005647	0.0178159
ENSG00000259458	MGC15885	uncharacterized protein MGC15885 [Source:NCBI gene (formerly Entrezgene);Acc:197003]	lncRNA	27.8525	2.03201	0.495332	4.10233	4.09012e-05	0.000189215
ENSG00000259581	TYRO3P	TYRO3P protein tyrosine kinase pseudogene [Source:HGNC Symbol;Acc:HGNC:12447]	processed_pseudogene	22.1294	2.50316	0.533864	4.68877	2.74857e-06	1.47205e-05
ENSG00000259676		novel transcript	lncRNA	11.9362	1.92802	0.700763	2.75132	0.00593561	0.0186284
ENSG00000259719	LINC02284	long intergenic non-protein coding RNA 2284 [Source:HGNC Symbol;Acc:HGNC:53201]	lncRNA	12.7581	-2.06306	0.74072	-2.78521	0.0053493	0.0169907
ENSG00000259798		novel transcript HYDIN	lncRNA	7.91328	2.31312	0.862809	2.68092	0.0073421	0.022529
ENSG00000259805		novel transcript, antisense to HOMER2, C15orf40 and BTBD1	lncRNA	2.48901	4.76473	1.75485	2.71517	0.00662409	0.0205716
ENSG00000259847	LINC02126	long intergenic non-protein coding RNA 2126 [Source:HGNC Symbol;Acc:HGNC:52983]	lncRNA	9.93937	-4.25591	1.05878	-4.01964	5.82871e-05	0.000263309
ENSG00000259868		novel transcript	lncRNA	27.3675	-4.7327	0.702142	-6.74037	1.57984e-11	1.33613e-10
ENSG00000259895	TEDC2-AS1	TEDC2 antisense RNA 1 [Source:HGNC Symbol;Acc:HGNC:55403]	lncRNA	38.6165	2.36085	0.404799	5.83215	5.47181e-09	3.84385e-08
ENSG00000259977		novel transcript	lncRNA	72.5868	1.53866	0.273311	5.6297	1.80521e-08	1.2108e-07
ENSG00000260003		novel transcript	lncRNA	13.0968	-3.36806	0.777387	-4.33254	1.47399e-05	7.23155e-05
ENSG00000260019	LINC01992	long intergenic non-protein coding RNA 1992 [Source:HGNC Symbol;Acc:HGNC:52824]	lncRNA	15.5396	3.42302	0.739432	4.62925	3.66987e-06	1.93496e-05
ENSG00000260022		novel transcript, antisense to LMF1	lncRNA	12.2138	2.3614	0.693801	3.40357	0.000665126	0.00253051
ENSG00000260029		novel transcript, antisense to NKD1	lncRNA	4.9756	5.76432	1.59239	3.61992	0.000294693	0.00119349
ENSG00000260034	LCMT1-AS2	LCMT1 antisense RNA 2 [Source:HGNC Symbol;Acc:HGNC:51178]	lncRNA	14.0995	1.89268	0.63711	2.97072	0.002971	0.00998117
ENSG00000260058		novel transcript	lncRNA	3.63662	-5.31764	1.61887	-3.28478	0.00102063	0.00375669
ENSG00000260101	AFTPH-DT	AFTPH divergent transcript [Source:HGNC Symbol;Acc:HGNC:52788]	lncRNA	17.0412	-1.50166	0.552773	-2.7166	0.00659563	0.0204998
ENSG00000260156		novel transcript, antisense to VAC14	lncRNA	9.27681	2.81066	0.900399	3.12157	0.0017989	0.00632209
ENSG00000260161	MTCYBP28	MT-CYB pseudogene 28 [Source:HGNC Symbol;Acc:HGNC:51994]	processed_pseudogene	2.31697	4.66196	1.77885	2.62077	0.00877314	0.0264058
ENSG00000260193	LINC02846	long intergenic non-protein coding RNA 2846 [Source:HGNC Symbol;Acc:HGNC:54381]	lncRNA	264.677	2.08189	0.157189	13.2445	4.85421e-40	1.30148e-38
ENSG00000260198		novel transcript, sense intronic to GNAO1	lncRNA	22.1637	2.98077	0.583755	5.1062	3.28708e-07	1.94219e-06
ENSG00000260228	CDH13-AS2	CDH13 antisense RNA 2 [Source:HGNC Symbol;Acc:HGNC:56243]	lncRNA	5.61889	-2.54904	1.06284	-2.39832	0.0164705	0.0460123
ENSG00000260229	PPIAP51	peptidylprolyl isomerase A pseudogene 51 [Source:HGNC Symbol;Acc:HGNC:53675]	processed_pseudogene	6.29193	3.08045	1.10419	2.78979	0.0052743	0.0167699
ENSG00000260230	FRRS1L	ferric chelate reductase 1 like [Source:HGNC Symbol;Acc:HGNC:1362]	nonsense_mediated_decay,protein_coding,retained_intron	18.3291	-2.19358	0.627557	-3.49544	0.000473289	0.00185083
ENSG00000260289		novel transcript	lncRNA	201.092	-2.89739	0.187407	-15.4604	6.41589e-54	2.31799e-52
ENSG00000260318	COX6CP1	cytochrome c oxidase subunit 6C pseudogene 1 [Source:HGNC Symbol;Acc:HGNC:2286]	processed_pseudogene	6.81352	2.55136	1.00728	2.53291	0.0113119	0.0330354
ENSG00000260328		novel transcript	lncRNA	223.862	2.59268	0.178139	14.5543	5.48795e-48	1.76382e-46
ENSG00000260403		novel transcript, antisense to CACNA1H	lncRNA	5.15344	3.22564	1.24936	2.58183	0.00982776	0.029175
ENSG00000260412		novel transcript, overlapping LINGO2	lncRNA	10.292	-5.83185	1.34021	-4.35145	1.35239e-05	6.6721e-05
ENSG00000260417		novel transcript	lncRNA	5.11323	2.74882	1.14963	2.39104	0.0168009	0.0468113
ENSG00000260495		novel transcript, antisense to GAN	lncRNA	20.5683	-1.59296	0.521692	-3.05345	0.00226226	0.00779901
ENSG00000260573		novel transcript	lncRNA	22.8211	6.08436	1.10848	5.48891	4.04424e-08	2.63341e-07
ENSG00000260585		novel transcript	lncRNA	8.63154	-3.58725	0.996078	-3.60137	0.000316544	0.0012766
ENSG00000260645		novel transcript	lncRNA	2.99113	-5.03465	1.70618	-2.95082	0.00316928	0.0105926
ENSG00000260763		novel transcript	lncRNA	6.97231	-3.24887	1.05254	-3.0867	0.00202393	0.00704573
ENSG00000260777		novel transcript	lncRNA	13.4127	2.5235	0.691018	3.65186	0.000260349	0.00106399
ENSG00000260877		novel transcript	lncRNA	90.3949	-2.14705	0.259977	-8.2586	1.47386e-16	1.69419e-15
ENSG00000260917		novel transcript, overlapping to VTI1A	lncRNA	62.3882	-4.92734	0.490067	-10.0544	8.78364e-24	1.4145e-22
ENSG00000260941	LINC00622	long intergenic non-protein coding RNA 622 [Source:HGNC Symbol;Acc:HGNC:44251]	lncRNA	27.2538	2.69232	0.528061	5.0985	3.42359e-07	2.02129e-06
ENSG00000260949		novel transcript, overlapping to EIF4EBP1	lncRNA	12.5589	2.55987	0.715176	3.57936	0.00034444	0.00138051
ENSG00000260984	FGFR3P5	fibroblast growth factor receptor 3 pseudogene 5 [Source:HGNC Symbol;Acc:HGNC:37950]	unprocessed_pseudogene	1.98336	4.43796	1.86428	2.38052	0.0172882	0.0479766
ENSG00000261003		novel transcript, overlapping to FAM120B	lncRNA	2.97069	3.97713	1.63981	2.42536	0.0152932	0.0431414
ENSG00000261010	RARRES2P6	retinoic acid receptor responder 2 pseudogene 6 [Source:HGNC Symbol;Acc:HGNC:48705]	processed_pseudogene	23.0401	-1.63198	0.471171	-3.46367	0.000532864	0.00206295
ENSG00000261036		novel transcript	lncRNA	17.9339	-5.73735	1.13995	-5.03301	4.82841e-07	2.80198e-06
ENSG00000261057	LINC00555	long intergenic non-protein coding RNA 555 [Source:HGNC Symbol;Acc:HGNC:43699]	lncRNA	2.12421	4.53929	1.87984	2.41473	0.015747	0.044246
ENSG00000261115	TMEM178B	transmembrane protein 178B [Source:HGNC Symbol;Acc:HGNC:44112]	protein_coding,retained_intron	239.66	-1.89732	0.163246	-11.6225	3.16878e-31	6.54417e-30
ENSG00000261126	RBFADN	RBFA downstream neighbor [Source:HGNC Symbol;Acc:HGNC:48591]	lncRNA	29.4738	2.54518	0.457022	5.56905	2.56138e-08	1.69749e-07
ENSG00000261170		novel transcript, antisense to CLEC18B	lncRNA	20.7674	-2.14773	0.552072	-3.8903	0.000100121	0.00043742
ENSG00000261172		novel transcript	lncRNA	13.5757	1.5326	0.618999	2.47593	0.0132891	0.038032
ENSG00000261210	CLEC19A	C-type lectin domain containing 19A [Source:HGNC Symbol;Acc:HGNC:34522]	nonsense_mediated_decay,protein_coding,protein_coding_CDS_not_defined	18.721	-2.05705	0.552972	-3.71998	0.000199236	0.000828863
ENSG00000261216		novel transcript, antisense to GSPT1	lncRNA	12.2166	1.85185	0.689383	2.68624	0.00722606	0.0222124
ENSG00000261291		novel transcript	lncRNA	7.96427	5.45059	1.39177	3.9163	8.99195e-05	0.000395737
ENSG00000261319	LINC02152	long intergenic non-protein coding RNA 2152 [Source:HGNC Symbol;Acc:HGNC:53014]	lncRNA	50.7296	-4.18137	0.459878	-9.09236	9.69151e-20	1.29411e-18
ENSG00000261399	MAPK8IP3-AS1	MAPK8IP3 antisense RNA 1 [Source:HGNC Symbol;Acc:HGNC:56087]	lncRNA	7.09684	3.27562	1.054	3.10779	0.00188492	0.00660391
ENSG00000261442		novel transcript, antisense to MGRN1	lncRNA	6.61861	4.24478	1.28714	3.29783	0.000974353	0.00359762
ENSG00000261488	TBILA	TGF-beta induced lncRNA [Source:HGNC Symbol;Acc:HGNC:53943]	lncRNA	57.257	1.54878	0.302019	5.12808	2.92716e-07	1.73725e-06
ENSG00000261527		transmembrane protein 111 (TMEM111) pseudogene	processed_pseudogene	10.7281	3.28869	0.87278	3.76807	0.000164517	0.00069473
ENSG00000261578		novel transcript, overlapping to TSKU	lncRNA	115.001	1.76255	0.228735	7.70565	1.30182e-14	1.33748e-13
ENSG00000261596		novel transcript, sense intronic to METTL9	lncRNA	86.8549	3.59719	0.32568	11.0452	2.31333e-28	4.41092e-27
ENSG00000261633		novel transcript, antisense to GPR56	lncRNA	8.59284	4.63613	1.23755	3.74622	0.000179518	0.000753186
ENSG00000261645	DISC1FP1	DISC1 fusion partner 1 [Source:HGNC Symbol;Acc:HGNC:33625]	lncRNA,retained_intron	15.0983	-2.46205	0.633382	-3.88715	0.00010143	0.000442571
ENSG00000261655		novel transcript, overlapping to GPR20	lncRNA	86.743	2.76633	0.287788	9.6124	7.08769e-22	1.05061e-20
ENSG00000261670		novel transcript	lncRNA	9.74295	2.46947	0.84579	2.91972	0.00350348	0.0115904
ENSG00000261692		novel transcript	lncRNA	7.81688	6.41527	1.39345	4.60388	4.14687e-06	2.17024e-05
ENSG00000261713	SSTR5-AS1	SSTR5 antisense RNA 1 [Source:HGNC Symbol;Acc:HGNC:26502]	lncRNA,TEC	14.4794	3.31204	0.746216	4.43845	9.06103e-06	4.55816e-05
ENSG00000261770		novel transcript	lncRNA	691.241	-2.24157	0.125358	-17.8813	1.64828e-71	8.11265e-70
ENSG00000261786		novel transcript	lncRNA	48.4567	-2.65825	0.372076	-7.14439	9.03987e-13	8.34754e-12
ENSG00000261916		novel transcript, sense intronic to readthrough SHPK-TRPV1	lncRNA	5.12217	2.74577	1.14453	2.39903	0.0164385	0.045944
ENSG00000262020		novel transcript, antisense to CLEC16A	lncRNA	5.91978	6.01666	1.45494	4.13532	3.54456e-05	0.000165001
ENSG00000262061	RPH3AL-AS1	RPH3AL antisense RNA 1 [Source:HGNC Symbol;Acc:HGNC:55345]	lncRNA,retained_intron	2.1572	4.55837	1.87489	2.43128	0.0150457	0.0425452
ENSG00000262147		novel transcript, antisense FOXK2	lncRNA	80.4559	1.70472	0.278959	6.11102	9.89939e-10	7.43427e-09
ENSG00000262172		novel transcript	lncRNA	10.1149	3.83487	0.964885	3.97443	7.05487e-05	0.000315667
ENSG00000262188	LINC01978	long intergenic non-protein coding RNA 1978 [Source:HGNC Symbol;Acc:HGNC:52806]	lncRNA	4.13861	-3.53267	1.43228	-2.46647	0.0136452	0.0389382
ENSG00000262402	MCUR1P1	MCUR1 pseudogene 1 [Source:HGNC Symbol;Acc:HGNC:1217]	processed_pseudogene	4.80629	4.70149	1.50005	3.13423	0.00172307	0.00607728
ENSG00000262406	MMP12	matrix metallopeptidase 12 [Source:HGNC Symbol;Acc:HGNC:7158]	protein_coding	21.7376	2.22783	0.560777	3.97275	7.10471e-05	0.000317756
ENSG00000262445		novel transcript, antisense to RTN4RL1	lncRNA	3.27822	4.12876	1.64374	2.5118	0.0120116	0.0348624
ENSG00000262454	MIR193BHG	MIR193b-365a host gene [Source:HGNC Symbol;Acc:HGNC:51945]	lncRNA	158.498	-1.91096	0.197004	-9.7001	3.01217e-22	4.53086e-21
ENSG00000262558		novel transcript, antisense to RPH3AL	lncRNA	2.31607	4.66149	1.78729	2.60813	0.0091038	0.0272855
ENSG00000262583	TMEM231P1	TMEM231 pseudogene 1 [Source:HGNC Symbol;Acc:HGNC:53870]	transcribed_unprocessed_pseudogene	44.8888	2.17783	0.358768	6.07029	1.27683e-09	9.5047e-09
ENSG00000262585	LINC01979	long intergenic non-protein coding RNA 1979 [Source:HGNC Symbol;Acc:HGNC:52807]	lncRNA	6.12425	-4.13644	1.3106	-3.15613	0.00159876	0.0056755
ENSG00000262655	SPON1	spondin 1 [Source:HGNC Symbol;Acc:HGNC:11252]	protein_coding,retained_intron	47.0599	1.72227	0.339839	5.06789	4.02253e-07	2.35714e-06
ENSG00000262708		BCL2-associated athanogene (BAG1) pseudogene	processed_pseudogene	2.33857	4.67341	1.81062	2.58111	0.00984845	0.0292279
ENSG00000262712		novel transcript	lncRNA	87.9273	1.54984	0.254108	6.09915	1.06634e-09	7.9904e-09
ENSG00000263011		novel transcript, sense overlapping ZNF205	lncRNA	10.8941	1.88447	0.733745	2.56829	0.0102202	0.0301789
ENSG00000263063		novel transcript	lncRNA	10.4685	-2.41085	0.776307	-3.10553	0.00189937	0.0066515
ENSG00000263065		novel transcript, antisense to MYH11	lncRNA	2.64367	4.85263	1.71507	2.82941	0.00466338	0.0149975
ENSG00000263089		novel transcript, antisense to AKAP1	lncRNA	15.5004	3.23286	0.701001	4.61177	3.99246e-06	2.09385e-05
ENSG00000263126		novel transcript	lncRNA	14.723	-1.53181	0.640431	-2.39184	0.016764	0.046717
ENSG00000263278		novel transcript, sense intronic to RBFOX3	lncRNA	2.29357	4.64949	1.81607	2.56019	0.0104615	0.0307872
ENSG00000263466		novel transcript, antisense to LASP1	lncRNA	7.42024	2.43522	0.92848	2.6228	0.00872097	0.0262773
ENSG00000263563	UBBP4	ubiquitin B pseudogene 4 [Source:HGNC Symbol;Acc:HGNC:12467]	transcribed_unprocessed_pseudogene	536.417	-3.91307	0.13975	-28.0006	1.59913e-172	2.40776e-170
ENSG00000263603		novel transcript	lncRNA	12.1302	2.07454	0.700814	2.96018	0.00307455	0.0103041
ENSG00000263624		novel transcript	lncRNA	9.11999	1.83742	0.775869	2.3682	0.0178747	0.04938
ENSG00000263740	RN7SL4P	RNA, 7SL, cytoplasmic 4, pseudogene [Source:HGNC Symbol;Acc:HGNC:10039]	misc_RNA	17.0172	4.29317	1.4902	2.88093	0.00396502	0.0129588
ENSG00000263745		novel transcript	lncRNA	3.6452	-4.29248	1.57064	-2.73294	0.00627709	0.0196035
ENSG00000263847		novel transcript, antisense to NDUFV2	lncRNA	94.0996	2.62735	0.268295	9.79276	1.20944e-22	1.85576e-21
ENSG00000264029		golgi SNAP receptor complex member 2 (GOSR2) pseudogene	transcribed_unprocessed_pseudogene	4.76997	3.10185	1.24016	2.50117	0.0123785	0.0357483
ENSG00000264187		novel protein	nonsense_mediated_decay	4.48513	-3.65845	1.40365	-2.60639	0.00915031	0.0274088
ENSG00000264279	MIR4786	microRNA 4786 [Source:HGNC Symbol;Acc:HGNC:41751]	miRNA	4.98471	-4.76145	1.4927	-3.18983	0.00142357	0.00509739
ENSG00000264304		novel transcript, antisense to FLOT2	lncRNA	13.9212	1.86937	0.645774	2.89478	0.00379423	0.01247
ENSG00000264424	MYH4	myosin heavy chain 4 [Source:HGNC Symbol;Acc:HGNC:7574]	protein_coding	17.6926	-2.32254	0.644967	-3.60101	0.000316979	0.00127782
ENSG00000264475		novel transcript, antisense to LAMA1	lncRNA	5.14522	3.22272	1.19367	2.69985	0.00693697	0.0214257
ENSG00000264513		novel transcript, antisense to TANC2	lncRNA	3.45353	5.23916	1.63227	3.20973	0.00132858	0.0047881
ENSG00000264529	DNAJB6P8	DNAJB6 pseudogene 8 [Source:HGNC Symbol;Acc:HGNC:54761]	transcribed_processed_pseudogene	4.97998	3.8084	1.36959	2.78068	0.00542444	0.0172014
ENSG00000264595		novel transcript	lncRNA	2.45692	4.74879	1.78081	2.66665	0.00766122	0.0233815
ENSG00000264750		novel transcript, antisense to SDK2	lncRNA	6.15932	4.13692	1.33734	3.09339	0.00197883	0.00689972
ENSG00000264792	MIR4637	microRNA 4637 [Source:HGNC Symbol;Acc:HGNC:41651]	miRNA	2.4839	4.76226	1.81654	2.62162	0.0087514	0.0263586
ENSG00000264837	VN1R71P	vomeronasal 1 receptor 71 pseudogene [Source:HGNC Symbol;Acc:HGNC:37392]	processed_pseudogene	5.98449	5.02759	1.43875	3.4944	0.000475123	0.00185729
ENSG00000264914		novel transcript, antisense to CUEDC1	lncRNA	10.7084	4.97029	1.19509	4.15892	3.1976e-05	0.000149785
ENSG00000265096	C1QTNF1-AS1	C1QTNF1 antisense RNA 1 [Source:HGNC Symbol;Acc:HGNC:44351]	lncRNA	50.5673	2.08664	0.368089	5.66885	1.43755e-08	9.75769e-08
ENSG00000265195	MIR4312	microRNA 4312 [Source:HGNC Symbol;Acc:HGNC:38376]	miRNA	6.11628	4.12492	1.32838	3.10523	0.0019013	0.00665748
ENSG00000265413		novel transcript, sense intronic to PTPRM	lncRNA	11.1018	-2.8934	0.790554	-3.65997	0.000252247	0.00103378
[truncated: 432 more rows]

## Sheet: Functional Annotation
origin	term_name	p.adj	-log10(P)	term_size	query_size	intersection_size	precision	recall	term_id	source	effective_domain_size	source_order	parents	intersection	intersection_ens
UP	Factor: ZBTB39; motif: CNCTGY	0.00312576	2.50504	15928	457	398	0.870897	0.0249874	TF:M12689	TF	19943	9134	TF:M00000	ENSG00000008118,ENSG00000008517,ENSG00000010310,ENSG00000010327,ENSG00000014257,ENSG00000019505,ENSG00000023445,ENSG00000027869,ENSG00000039987,ENSG00000042832,ENSG00000046774,ENSG00000050344,ENSG00000052344,ENSG00000054690,ENSG00000056558,ENSG00000057468,ENSG00000060656,ENSG00000064195,ENSG00000064201,ENSG00000064205,ENSG00000068976,ENSG00000069431,ENSG00000069764,ENSG00000070526,ENSG00000073737…	CAMK1G,IL32,GIPR,STAB1,ACP3,SYT13,BIRC3,SH2D2A,BEST2,TG,MAGEC2,NFE2L3,PRSS8,PLEKHH1,TRAF1,MSH4,PTPRU,DLX3,TSPAN32,CCN5,PYGM,ABCC9,PLA2G10,ST6GALNAC1,DHRS9,CST7,CEACAM1,IL12RB2,ACHE,REM1,CFAP61,NLRP1,ANGPT2,UNC13D,SH2D3C,PALMD,MISP,SERPIND1,CYTH4,MFNG,LGALS2,BIK,APOBEC3H,SLC10A1,HNF4A,COL20A1,PROKR2,CDH20,RNF125,GPR143,ASB9,PLLP,TMC5,RHOV,KCNA7,RSPH6A,OVOL3,TJP3,HAS1,GHRHR,ZNF862,TNFSF8,ACTA2,RNF4…
UP	Factor: GATAD2A; motif: CCTKTG	0.0494896	1.30549	15373	457	378	0.827133	0.0245886	TF:M09726	TF	19943	3004	TF:M00000	ENSG00000001626,ENSG00000008118,ENSG00000008323,ENSG00000008517,ENSG00000010310,ENSG00000010327,ENSG00000019505,ENSG00000023445,ENSG00000027869,ENSG00000039987,ENSG00000042832,ENSG00000046774,ENSG00000050344,ENSG00000052344,ENSG00000053438,ENSG00000054690,ENSG00000056558,ENSG00000057468,ENSG00000060656,ENSG00000064195,ENSG00000064201,ENSG00000064205,ENSG00000068976,ENSG00000069431,ENSG00000069764…	CFTR,CAMK1G,PLEKHG6,IL32,GIPR,STAB1,SYT13,BIRC3,SH2D2A,BEST2,TG,MAGEC2,NFE2L3,PRSS8,NNAT,PLEKHH1,TRAF1,MSH4,PTPRU,DLX3,TSPAN32,CCN5,PYGM,ABCC9,PLA2G10,ST6GALNAC1,CST7,CEACAM1,IL12RB2,ACHE,REM1,NLRP1,ANGPT2,UNC13D,SH2D3C,PDE6C,MISP,SERPIND1,CYTH4,MFNG,LGALS2,BIK,SLC10A1,HNF4A,COL20A1,PROKR2,CDH20,RNF125,GPR143,ASB9,PLLP,RHOV,CKM,RSPH6A,OVOL3,TJP3,HAS1,GHRHR,ZNF862,TNFSF8,ACTA2,RNF43,P2RX1,GABRA4,F…
UP	Factor: Lyl-1; motif: NCAKCTGYTNYCNN	0.00731202	2.13596	13948	457	355	0.776805	0.0254517	TF:M09977	TF	19943	4838	TF:M00000	ENSG00000008118,ENSG00000008323,ENSG00000008517,ENSG00000010310,ENSG00000010327,ENSG00000014257,ENSG00000019505,ENSG00000023445,ENSG00000039987,ENSG00000042832,ENSG00000046774,ENSG00000050344,ENSG00000052344,ENSG00000053438,ENSG00000064195,ENSG00000064201,ENSG00000064205,ENSG00000068976,ENSG00000069431,ENSG00000069764,ENSG00000070526,ENSG00000073350,ENSG00000077984,ENSG00000079385,ENSG00000081985…	CAMK1G,PLEKHG6,IL32,GIPR,STAB1,ACP3,SYT13,BIRC3,BEST2,TG,MAGEC2,NFE2L3,PRSS8,NNAT,DLX3,TSPAN32,CCN5,PYGM,ABCC9,PLA2G10,ST6GALNAC1,LLGL2,CST7,CEACAM1,IL12RB2,ACHE,REM1,CFAP61,NLRP1,ANGPT2,UNC13D,SH2D3C,MISP,SERPIND1,CYTH4,MFNG,LGALS2,APOBEC3H,HNF4A,COL20A1,PROKR2,CDH20,RNF125,GPR143,PLLP,TMC5,KCNA7,CKM,RSPH6A,OVOL3,TJP3,HAS1,GHRHR,ZNF862,TNFSF8,ACTA2,RNF43,P2RX1,GABRA4,FOLR1,OAS2,ARHGDIB,UNC93A,AA…
UP	Factor: Zbtb44; motif: CKGTGA	0.0181312	1.74157	14002	457	353	0.772429	0.0252107	TF:M05405	TF	19943	9154	TF:M00000	ENSG00000001626,ENSG00000008118,ENSG00000008323,ENSG00000008517,ENSG00000010310,ENSG00000010327,ENSG00000014257,ENSG00000019505,ENSG00000023445,ENSG00000027869,ENSG00000039987,ENSG00000042832,ENSG00000046774,ENSG00000050344,ENSG00000053438,ENSG00000054690,ENSG00000056558,ENSG00000057468,ENSG00000064195,ENSG00000064201,ENSG00000064205,ENSG00000068976,ENSG00000069431,ENSG00000069764,ENSG00000070526…	CFTR,CAMK1G,PLEKHG6,IL32,GIPR,STAB1,ACP3,SYT13,BIRC3,SH2D2A,BEST2,TG,MAGEC2,NFE2L3,NNAT,PLEKHH1,TRAF1,MSH4,DLX3,TSPAN32,CCN5,PYGM,ABCC9,PLA2G10,ST6GALNAC1,DHRS9,CST7,CEACAM1,IL12RB2,ACHE,REM1,NLRP1,ANGPT2,UNC13D,SH2D3C,PDE6C,PALMD,SERPIND1,CYTH4,MFNG,LGALS2,APOBEC3H,SLC10A1,HNF4A,COL20A1,PROKR2,CDH20,RNF125,GPR143,ASB9,PLLP,TMC5,RHOV,KCNA7,CKM,RSPH6A,OVOL3,TJP3,HAS1,GHRHR,P2RX1,GABRA4,FOLR1,OAS2,…
UP	Factor: AML1; motif: TGTGGT	0.00148715	2.82765	12240	457	324	0.708972	0.0264706	TF:M00751	TF	19943	80	TF:M00000	ENSG00000008323,ENSG00000008517,ENSG00000010310,ENSG00000014257,ENSG00000023445,ENSG00000027869,ENSG00000042832,ENSG00000050344,ENSG00000052344,ENSG00000053438,ENSG00000054690,ENSG00000057468,ENSG00000060656,ENSG00000064201,ENSG00000068976,ENSG00000070526,ENSG00000073737,ENSG00000077984,ENSG00000079385,ENSG00000081985,ENSG00000088320,ENSG00000089101,ENSG00000091592,ENSG00000091879,ENSG00000092929…	PLEKHG6,IL32,GIPR,ACP3,BIRC3,SH2D2A,TG,NFE2L3,PRSS8,NNAT,PLEKHH1,MSH4,PTPRU,TSPAN32,PYGM,ST6GALNAC1,DHRS9,CST7,CEACAM1,IL12RB2,REM1,CFAP61,NLRP1,ANGPT2,UNC13D,SH2D3C,PALMD,SERPIND1,LGALS2,BIK,APOBEC3H,COL20A1,PROKR2,CDH20,RNF125,GPR143,PLLP,TMC5,RHOV,OVOL3,TJP3,HAS1,GHRHR,ZNF862,OGN,TNFSF8,RNF43,P2RX1,FOLR1,OAS2,ARHGDIB,UNC93A,AADAC,IL1A,GALNT3,KCNJ13,PLCD4,ANGPTL1,TSPAN1,HSD11B1,PROX2,IFIT3,IFIT…
UP	Factor: AML1; motif: TGTGGT	0.00148715	2.82765	12240	457	324	0.708972	0.0264706	TF:M02084	TF	19943	78	TF:M00000	ENSG00000008323,ENSG00000008517,ENSG00000010310,ENSG00000014257,ENSG00000023445,ENSG00000027869,ENSG00000042832,ENSG00000050344,ENSG00000052344,ENSG00000053438,ENSG00000054690,ENSG00000057468,ENSG00000060656,ENSG00000064201,ENSG00000068976,ENSG00000070526,ENSG00000073737,ENSG00000077984,ENSG00000079385,ENSG00000081985,ENSG00000088320,ENSG00000089101,ENSG00000091592,ENSG00000091879,ENSG00000092929…	PLEKHG6,IL32,GIPR,ACP3,BIRC3,SH2D2A,TG,NFE2L3,PRSS8,NNAT,PLEKHH1,MSH4,PTPRU,TSPAN32,PYGM,ST6GALNAC1,DHRS9,CST7,CEACAM1,IL12RB2,REM1,CFAP61,NLRP1,ANGPT2,UNC13D,SH2D3C,PALMD,SERPIND1,LGALS2,BIK,APOBEC3H,COL20A1,PROKR2,CDH20,RNF125,GPR143,PLLP,TMC5,RHOV,OVOL3,TJP3,HAS1,GHRHR,ZNF862,OGN,TNFSF8,RNF43,P2RX1,FOLR1,OAS2,ARHGDIB,UNC93A,AADAC,IL1A,GALNT3,KCNJ13,PLCD4,ANGPTL1,TSPAN1,HSD11B1,PROX2,IFIT3,IFIT…
UP	Factor: AML1a; motif: TGTGGT	0.00148715	2.82765	12240	457	324	0.708972	0.0264706	TF:M00271	TF	19943	66	TF:M00000	ENSG00000008323,ENSG00000008517,ENSG00000010310,ENSG00000014257,ENSG00000023445,ENSG00000027869,ENSG00000042832,ENSG00000050344,ENSG00000052344,ENSG00000053438,ENSG00000054690,ENSG00000057468,ENSG00000060656,ENSG00000064201,ENSG00000068976,ENSG00000070526,ENSG00000073737,ENSG00000077984,ENSG00000079385,ENSG00000081985,ENSG00000088320,ENSG00000089101,ENSG00000091592,ENSG00000091879,ENSG00000092929…	PLEKHG6,IL32,GIPR,ACP3,BIRC3,SH2D2A,TG,NFE2L3,PRSS8,NNAT,PLEKHH1,MSH4,PTPRU,TSPAN32,PYGM,ST6GALNAC1,DHRS9,CST7,CEACAM1,IL12RB2,REM1,CFAP61,NLRP1,ANGPT2,UNC13D,SH2D3C,PALMD,SERPIND1,LGALS2,BIK,APOBEC3H,COL20A1,PROKR2,CDH20,RNF125,GPR143,PLLP,TMC5,RHOV,OVOL3,TJP3,HAS1,GHRHR,ZNF862,OGN,TNFSF8,RNF43,P2RX1,FOLR1,OAS2,ARHGDIB,UNC93A,AADAC,IL1A,GALNT3,KCNJ13,PLCD4,ANGPTL1,TSPAN1,HSD11B1,PROX2,IFIT3,IFIT…
UP	biological regulation	0.000999099	3.00039	13096	424	306	0.721698	0.0233659	GO:0065007	GO:BP	21092	18589	GO:0008150	ENSG00000001626,ENSG00000008323,ENSG00000008517,ENSG00000010310,ENSG00000010327,ENSG00000014257,ENSG00000019505,ENSG00000023445,ENSG00000027869,ENSG00000039987,ENSG00000042832,ENSG00000046774,ENSG00000050344,ENSG00000052344,ENSG00000053438,ENSG00000056558,ENSG00000060656,ENSG00000064195,ENSG00000064201,ENSG00000064205,ENSG00000069431,ENSG00000069764,ENSG00000073350,ENSG00000073737,ENSG00000077984…	CFTR,PLEKHG6,IL32,GIPR,STAB1,ACP3,SYT13,BIRC3,SH2D2A,BEST2,TG,MAGEC2,NFE2L3,PRSS8,NNAT,TRAF1,PTPRU,DLX3,TSPAN32,CCN5,ABCC9,PLA2G10,LLGL2,DHRS9,CST7,CEACAM1,IL12RB2,ACHE,REM1,NLRP1,ANGPT2,UNC13D,SH2D3C,PDE6C,PALMD,MISP,SERPIND1,CYTH4,MFNG,LGALS2,BIK,APOBEC3H,SLC10A1,HNF4A,PROKR2,RNF125,GPR143,ASB9,RHOV,KCNA7,OVOL3,TJP3,HAS1,GHRHR,ZNF862,OGN,TNFSF8,ACTA2,RNF43,P2RX1,GABRA4,FOLR1,OAS2,ARHGDIB,AADAC,…
UP	Factor: FOXO1A:PDEF; motif: WNCCGGATGTTDN	0.00950952	2.02184	11718	457	306	0.669584	0.0261137	TF:M08486	TF	19943	2720	TF:M00000	ENSG00000001626,ENSG00000008118,ENSG00000010310,ENSG00000010327,ENSG00000019505,ENSG00000027869,ENSG00000046774,ENSG00000050344,ENSG00000054690,ENSG00000056558,ENSG00000057468,ENSG00000060656,ENSG00000064195,ENSG00000064201,ENSG00000064205,ENSG00000068976,ENSG00000069431,ENSG00000073737,ENSG00000077984,ENSG00000079385,ENSG00000091592,ENSG00000095464,ENSG00000099260,ENSG00000099937,ENSG00000100055…	CFTR,CAMK1G,GIPR,STAB1,SYT13,SH2D2A,MAGEC2,NFE2L3,PLEKHH1,TRAF1,MSH4,PTPRU,DLX3,TSPAN32,CCN5,PYGM,ABCC9,DHRS9,CST7,CEACAM1,NLRP1,PDE6C,PALMD,SERPIND1,CYTH4,APOBEC3H,SLC10A1,HNF4A,COL20A1,PROKR2,GPR143,ASB9,PLLP,TMC5,RHOV,KCNA7,CKM,RSPH6A,OVOL3,TJP3,HAS1,GHRHR,ZNF862,OGN,ACTA2,RNF43,P2RX1,FOLR1,OAS2,ARHGDIB,GALNT3,PLCD4,ELAPOR1,TSPAN1,NR4A3,PROX2,IFIT2,SFRP5,INSL4,MYCT1,TNFRSF8,PAEP,OBP2A,NFE2,COL…
UP	Factor: ZBTB39; motif: CNCTGY; match class: 1	3.53454e-06	5.45167	10053	457	294	0.643326	0.029245	TF:M12689_1	TF	19943	9135	TF:M12689	ENSG00000008118,ENSG00000008517,ENSG00000010310,ENSG00000010327,ENSG00000014257,ENSG00000023445,ENSG00000027869,ENSG00000042832,ENSG00000046774,ENSG00000050344,ENSG00000054690,ENSG00000056558,ENSG00000057468,ENSG00000064195,ENSG00000064201,ENSG00000064205,ENSG00000069764,ENSG00000070526,ENSG00000073737,ENSG00000079385,ENSG00000081985,ENSG00000089101,ENSG00000091592,ENSG00000091879,ENSG00000092929…	CAMK1G,IL32,GIPR,STAB1,ACP3,BIRC3,SH2D2A,TG,MAGEC2,NFE2L3,PLEKHH1,TRAF1,MSH4,DLX3,TSPAN32,CCN5,PLA2G10,ST6GALNAC1,DHRS9,CEACAM1,IL12RB2,CFAP61,NLRP1,ANGPT2,UNC13D,SH2D3C,PALMD,MISP,SERPIND1,CYTH4,MFNG,LGALS2,BIK,APOBEC3H,HNF4A,COL20A1,CDH20,RNF125,GPR143,ASB9,PLLP,TMC5,RHOV,KCNA7,OVOL3,TJP3,HAS1,GHRHR,ZNF862,TNFSF8,ACTA2,RNF43,P2RX1,GABRA4,OAS2,ARHGDIB,UNC93A,AADAC,IL1A,GALNT3,KCNJ13,PLCD4,ANGPTL…
UP	regulation of biological process	0.00635178	2.1971	12361	424	286	0.674528	0.0231373	GO:0050789	GO:BP	21092	15301	GO:0008150,GO:0065007	ENSG00000001626,ENSG00000008323,ENSG00000008517,ENSG00000010310,ENSG00000010327,ENSG00000014257,ENSG00000019505,ENSG00000023445,ENSG00000027869,ENSG00000042832,ENSG00000046774,ENSG00000050344,ENSG00000052344,ENSG00000053438,ENSG00000056558,ENSG00000060656,ENSG00000064195,ENSG00000064201,ENSG00000064205,ENSG00000069431,ENSG00000069764,ENSG00000073350,ENSG00000077984,ENSG00000079385,ENSG00000081985…	CFTR,PLEKHG6,IL32,GIPR,STAB1,ACP3,SYT13,BIRC3,SH2D2A,TG,MAGEC2,NFE2L3,PRSS8,NNAT,TRAF1,PTPRU,DLX3,TSPAN32,CCN5,ABCC9,PLA2G10,LLGL2,CST7,CEACAM1,IL12RB2,ACHE,REM1,NLRP1,ANGPT2,UNC13D,SH2D3C,PDE6C,PALMD,MISP,SERPIND1,CYTH4,MFNG,LGALS2,BIK,APOBEC3H,SLC10A1,HNF4A,PROKR2,RNF125,GPR143,ASB9,RHOV,KCNA7,OVOL3,HAS1,GHRHR,ZNF862,OGN,TNFSF8,ACTA2,RNF43,P2RX1,GABRA4,FOLR1,OAS2,ARHGDIB,AADAC,IL1A,GALNT3,KCNJ1…
UP	Factor: ETV4; motif: NCAGGAAGNN	0.0230296	1.63771	10931	457	285	0.623632	0.0260726	TF:M12556	TF	19943	2270	TF:M00000	ENSG00000008517,ENSG00000014257,ENSG00000023445,ENSG00000027869,ENSG00000042832,ENSG00000046774,ENSG00000053438,ENSG00000064201,ENSG00000064205,ENSG00000068976,ENSG00000070526,ENSG00000073350,ENSG00000073737,ENSG00000077984,ENSG00000079385,ENSG00000087085,ENSG00000088320,ENSG00000089101,ENSG00000091592,ENSG00000091879,ENSG00000095370,ENSG00000095464,ENSG00000099260,ENSG00000099812,ENSG00000099937…	IL32,ACP3,BIRC3,SH2D2A,TG,MAGEC2,NNAT,TSPAN32,CCN5,PYGM,ST6GALNAC1,LLGL2,DHRS9,CST7,CEACAM1,ACHE,REM1,CFAP61,NLRP1,ANGPT2,SH2D3C,PDE6C,PALMD,MISP,SERPIND1,CYTH4,MFNG,APOBEC3H,SLC10A1,COL20A1,PROKR2,CDH20,GPR143,ASB9,TMC5,RHOV,KCNA7,CKM,OVOL3,TJP3,GHRHR,ZNF862,TNFSF8,ACTA2,RNF43,P2RX1,GABRA4,FOLR1,UNC93A,IL1A,GALNT3,PLCD4,ANGPTL1,ACTL8,TSPAN1,PROX2,IFIT3,IFIT2,SFRP5,LRP11,TTLL2,LRAT,CCRL2,TMEM156,…
UP	Factor: MAFB; motif: NTCAGCN	0.00085836	3.06633	10249	457	282	0.617068	0.0275149	TF:M08888	TF	19943	4864	TF:M00000	ENSG00000008118,ENSG00000008517,ENSG00000010310,ENSG00000010327,ENSG00000014257,ENSG00000019505,ENSG00000027869,ENSG00000046774,ENSG00000050344,ENSG00000054690,ENSG00000056558,ENSG00000057468,ENSG00000064195,ENSG00000064201,ENSG00000064205,ENSG00000068976,ENSG00000070526,ENSG00000077984,ENSG00000079385,ENSG00000081985,ENSG00000089101,ENSG00000091592,ENSG00000091879,ENSG00000092929,ENSG00000095370…	CAMK1G,IL32,GIPR,STAB1,ACP3,SYT13,SH2D2A,MAGEC2,NFE2L3,PLEKHH1,TRAF1,MSH4,DLX3,TSPAN32,CCN5,PYGM,ST6GALNAC1,CST7,CEACAM1,IL12RB2,CFAP61,NLRP1,ANGPT2,UNC13D,SH2D3C,PALMD,MISP,SERPIND1,APOBEC3H,SLC10A1,HNF4A,COL20A1,RNF125,GPR143,ASB9,PLLP,RHOV,CKM,TJP3,HAS1,GHRHR,ZNF862,OGN,TNFSF8,ACTA2,RNF43,P2RX1,OAS2,AADAC,IL1A,GALNT3,PLCD4,ANGPTL1,ELAPOR1,ACTL8,TSPAN1,HSD11B1,PROX2,IFIT3,IFIT2,SFRP5,INSL4,MYCT…
UP	Factor: GATAD2A; motif: CCTKTG; match class: 1	3.53454e-06	5.45167	9143	457	274	0.599562	0.0299683	TF:M09726_1	TF	19943	3005	TF:M09726	ENSG00000008323,ENSG00000008517,ENSG00000010310,ENSG00000010327,ENSG00000019505,ENSG00000023445,ENSG00000039987,ENSG00000042832,ENSG00000046774,ENSG00000052344,ENSG00000054690,ENSG00000060656,ENSG00000064195,ENSG00000064201,ENSG00000064205,ENSG00000068976,ENSG00000069431,ENSG00000069764,ENSG00000070526,ENSG00000077984,ENSG00000079385,ENSG00000088320,ENSG00000091592,ENSG00000092929,ENSG00000095370…	PLEKHG6,IL32,GIPR,STAB1,SYT13,BIRC3,BEST2,TG,MAGEC2,PRSS8,PLEKHH1,PTPRU,DLX3,TSPAN32,CCN5,PYGM,ABCC9,PLA2G10,ST6GALNAC1,CST7,CEACAM1,REM1,NLRP1,UNC13D,SH2D3C,PDE6C,MISP,SERPIND1,CYTH4,MFNG,BIK,SLC10A1,HNF4A,COL20A1,PROKR2,CDH20,GPR143,ASB9,PLLP,RHOV,CKM,OVOL3,TJP3,HAS1,GHRHR,ZNF862,RNF43,P2RX1,FOLR1,OAS2,ARHGDIB,UNC93A,PLCD4,ACTL8,TSPAN1,HSD11B1,NR4A3,PROX2,IFIT3,IFIT2,LRP11,MYCT1,TTLL2,TNFRSF8,L…
UP	Factor: Elk-1; motif: CTTCCKG	0.0272004	1.56542	10473	457	274	0.599562	0.0261625	TF:M07252	TF	19943	1854	TF:M00000	ENSG00000008517,ENSG00000014257,ENSG00000023445,ENSG00000027869,ENSG00000042832,ENSG00000046774,ENSG00000053438,ENSG00000064201,ENSG00000064205,ENSG00000068976,ENSG00000070526,ENSG00000073350,ENSG00000073737,ENSG00000077984,ENSG00000079385,ENSG00000087085,ENSG00000088320,ENSG00000089101,ENSG00000091592,ENSG00000091879,ENSG00000095464,ENSG00000099260,ENSG00000099812,ENSG00000099937,ENSG00000100055…	IL32,ACP3,BIRC3,SH2D2A,TG,MAGEC2,NNAT,TSPAN32,CCN5,PYGM,ST6GALNAC1,LLGL2,DHRS9,CST7,CEACAM1,ACHE,REM1,CFAP61,NLRP1,ANGPT2,PDE6C,PALMD,MISP,SERPIND1,CYTH4,MFNG,APOBEC3H,SLC10A1,COL20A1,PROKR2,CDH20,GPR143,ASB9,TMC5,RHOV,KCNA7,CKM,OVOL3,TJP3,GHRHR,ZNF862,TNFSF8,ACTA2,RNF43,P2RX1,GABRA4,FOLR1,UNC93A,IL1A,GALNT3,PLCD4,ANGPTL1,ACTL8,TSPAN1,PROX2,IFIT3,IFIT2,SFRP5,LRP11,TTLL2,LRAT,CCRL2,TMEM156,PAEP,OB…
UP	Factor: c-Ets-2; motif: CTTCCTG	0.0272004	1.56542	10473	457	274	0.599562	0.0261625	TF:M01207	TF	19943	2182	TF:M00000	ENSG00000008517,ENSG00000014257,ENSG00000023445,ENSG00000027869,ENSG00000042832,ENSG00000046774,ENSG00000053438,ENSG00000064201,ENSG00000064205,ENSG00000068976,ENSG00000070526,ENSG00000073350,ENSG00000073737,ENSG00000077984,ENSG00000079385,ENSG00000087085,ENSG00000088320,ENSG00000089101,ENSG00000091592,ENSG00000091879,ENSG00000095464,ENSG00000099260,ENSG00000099812,ENSG00000099937,ENSG00000100055…	IL32,ACP3,BIRC3,SH2D2A,TG,MAGEC2,NNAT,TSPAN32,CCN5,PYGM,ST6GALNAC1,LLGL2,DHRS9,CST7,CEACAM1,ACHE,REM1,CFAP61,NLRP1,ANGPT2,PDE6C,PALMD,MISP,SERPIND1,CYTH4,MFNG,APOBEC3H,SLC10A1,COL20A1,PROKR2,CDH20,GPR143,ASB9,TMC5,RHOV,KCNA7,CKM,OVOL3,TJP3,GHRHR,ZNF862,TNFSF8,ACTA2,RNF43,P2RX1,GABRA4,FOLR1,UNC93A,IL1A,GALNT3,PLCD4,ANGPTL1,ACTL8,TSPAN1,PROX2,IFIT3,IFIT2,SFRP5,LRP11,TTLL2,LRAT,CCRL2,TMEM156,PAEP,OB…
UP	Factor: NFE2L1; motif: NNNATGACTCAGCANW	0.0112925	1.94721	10007	457	267	0.584245	0.0266813	TF:M12499	TF	19943	5642	TF:M00000	ENSG00000008517,ENSG00000010310,ENSG00000014257,ENSG00000019505,ENSG00000027869,ENSG00000039987,ENSG00000046774,ENSG00000064205,ENSG00000068976,ENSG00000069431,ENSG00000073737,ENSG00000077984,ENSG00000079385,ENSG00000089101,ENSG00000091879,ENSG00000092929,ENSG00000099260,ENSG00000099812,ENSG00000099937,ENSG00000100055,ENSG00000100060,ENSG00000100079,ENSG00000101076,ENSG00000101542,ENSG00000101695…	IL32,GIPR,ACP3,SYT13,SH2D2A,BEST2,MAGEC2,CCN5,PYGM,ABCC9,DHRS9,CST7,CEACAM1,CFAP61,ANGPT2,UNC13D,PALMD,MISP,SERPIND1,CYTH4,MFNG,LGALS2,HNF4A,CDH20,RNF125,ASB9,TMC5,RHOV,OVOL3,TJP3,HAS1,GHRHR,ZNF862,OGN,TNFSF8,RNF43,FOLR1,ARHGDIB,UNC93A,IL1A,GALNT3,KCNJ13,PLCD4,ANGPTL1,ELAPOR1,ACTL8,IFIT2,SFRP5,INSL4,LRP11,TNFRSF8,CCRL2,PAEP,NFE2,G0S2,INHA,GCNT7,PI3,ZBP1,RAB17,IL1B,OMG,LOC101927057,TSPAN8,ADGRE2,A…
UP	regulation of cellular process	0.0174583	1.758	11130	424	258	0.608491	0.0231806	GO:0050794	GO:BP	21092	15305	GO:0009987,GO:0050789	ENSG00000001626,ENSG00000008323,ENSG00000008517,ENSG00000010310,ENSG00000014257,ENSG00000019505,ENSG00000023445,ENSG00000027869,ENSG00000042832,ENSG00000046774,ENSG00000050344,ENSG00000053438,ENSG00000056558,ENSG00000060656,ENSG00000064195,ENSG00000064201,ENSG00000064205,ENSG00000069431,ENSG00000069764,ENSG00000073350,ENSG00000077984,ENSG00000079385,ENSG00000081985,ENSG00000087085,ENSG00000088320…	CFTR,PLEKHG6,IL32,GIPR,ACP3,SYT13,BIRC3,SH2D2A,TG,MAGEC2,NFE2L3,NNAT,TRAF1,PTPRU,DLX3,TSPAN32,CCN5,ABCC9,PLA2G10,LLGL2,CST7,CEACAM1,IL12RB2,ACHE,REM1,NLRP1,ANGPT2,UNC13D,SH2D3C,PDE6C,MISP,CYTH4,MFNG,LGALS2,BIK,APOBEC3H,SLC10A1,HNF4A,PROKR2,RNF125,GPR143,ASB9,RHOV,KCNA7,OVOL3,HAS1,GHRHR,ZNF862,OGN,TNFSF8,ACTA2,RNF43,P2RX1,GABRA4,FOLR1,OAS2,ARHGDIB,AADAC,IL1A,GALNT3,KCNJ13,PLCD4,ANGPTL1,ELAPOR1,NR4…
UP	membrane	3.10717e-05	4.50763	9856	453	258	0.569536	0.0261769	GO:0016020	GO:CC	21690	848	GO:0110165	ENSG00000001626,ENSG00000008118,ENSG00000008323,ENSG00000008517,ENSG00000010310,ENSG00000010327,ENSG00000014257,ENSG00000019505,ENSG00000023445,ENSG00000039987,ENSG00000052344,ENSG00000053438,ENSG00000056558,ENSG00000060656,ENSG00000064201,ENSG00000069431,ENSG00000070526,ENSG00000073350,ENSG00000073737,ENSG00000079385,ENSG00000081985,ENSG00000087085,ENSG00000088320,ENSG00000089101,ENSG00000091879…	CFTR,CAMK1G,PLEKHG6,IL32,GIPR,STAB1,ACP3,SYT13,BIRC3,BEST2,PRSS8,NNAT,TRAF1,PTPRU,TSPAN32,ABCC9,ST6GALNAC1,LLGL2,DHRS9,CEACAM1,IL12RB2,ACHE,REM1,CFAP61,ANGPT2,UNC13D,SH2D3C,PDE6C,PALMD,MISP,CYTH4,MFNG,BIK,SLC10A1,PROKR2,CDH20,RNF125,GPR143,PLLP,TMC5,RHOV,KCNA7,TJP3,HAS1,GHRHR,TNFSF8,RNF43,P2RX1,GABRA4,FOLR1,OAS2,ARHGDIB,UNC93A,AADAC,IL1A,GALNT3,KCNJ13,PLCD4,ELAPOR1,TSPAN1,HSD11B1,LRP11,MYCT1,TNFR…
UP	Factor: VDR,; motif: RRTGNMCYTNNTGAMCCNYNT	0.046783	1.32991	9878	457	258	0.564551	0.0261186	TF:M00966	TF	19943	1366	TF:M00000	ENSG00000008118,ENSG00000008323,ENSG00000008517,ENSG00000010310,ENSG00000014257,ENSG00000019505,ENSG00000039987,ENSG00000057468,ENSG00000064195,ENSG00000064201,ENSG00000064205,ENSG00000068976,ENSG00000069764,ENSG00000070526,ENSG00000073350,ENSG00000073737,ENSG00000079385,ENSG00000081985,ENSG00000087085,ENSG00000088320,ENSG00000089101,ENSG00000095370,ENSG00000095464,ENSG00000099260,ENSG00000099812…	CAMK1G,PLEKHG6,IL32,GIPR,ACP3,SYT13,BEST2,MSH4,DLX3,TSPAN32,CCN5,PYGM,PLA2G10,ST6GALNAC1,LLGL2,DHRS9,CEACAM1,IL12RB2,ACHE,REM1,CFAP61,SH2D3C,PDE6C,PALMD,MISP,SERPIND1,MFNG,SLC10A1,HNF4A,COL20A1,ASB9,PLLP,TMC5,RHOV,KCNA7,RSPH6A,OVOL3,TNFSF8,ACTA2,RNF43,FOLR1,OAS2,PLCD4,TSPAN1,NR4A3,PROX2,IFIT2,INSL4,LRP11,MYCT1,TTLL2,TNFRSF8,LRAT,TMEM156,PAEP,OBP2A,COL10A1,INHA,GCNT7,PI3,IL1B,APOL3,MCHR1,AANAT,IQC…
UP	response to stimulus	3.28705e-08	7.48319	9000	424	249	0.587264	0.0276667	GO:0050896	GO:BP	21092	15390	GO:0008150	ENSG00000001626,ENSG00000008323,ENSG00000008517,ENSG00000010310,ENSG00000010327,ENSG00000014257,ENSG00000019505,ENSG00000023445,ENSG00000027869,ENSG00000042832,ENSG00000050344,ENSG00000056558,ENSG00000057468,ENSG00000060656,ENSG00000064195,ENSG00000064201,ENSG00000064205,ENSG00000069431,ENSG00000069764,ENSG00000073350,ENSG00000077984,ENSG00000079385,ENSG00000081985,ENSG00000087085,ENSG00000091592…	CFTR,PLEKHG6,IL32,GIPR,STAB1,ACP3,SYT13,BIRC3,SH2D2A,TG,NFE2L3,TRAF1,MSH4,PTPRU,DLX3,TSPAN32,CCN5,ABCC9,PLA2G10,LLGL2,CST7,CEACAM1,IL12RB2,ACHE,NLRP1,ANGPT2,UNC13D,SH2D3C,PDE6C,SERPIND1,CYTH4,MFNG,LGALS2,BIK,APOBEC3H,SLC10A1,HNF4A,PROKR2,RNF125,GPR143,ASB9,PLLP,RHOV,HAS1,GHRHR,OGN,TNFSF8,ACTA2,RNF43,P2RX1,GABRA4,FOLR1,OAS2,ARHGDIB,AADAC,IL1A,GALNT3,PLCD4,ANGPTL1,ELAPOR1,NR4A3,IFIT3,IFIT2,SFRP5,IN…
UP	Factor: Smad2; motif: AGACAN; match class: 1	0.0182698	1.73827	9131	457	245	0.536105	0.0268317	TF:M03580_1	TF	19943	7577	TF:M03580	ENSG00000008118,ENSG00000008323,ENSG00000008517,ENSG00000010310,ENSG00000010327,ENSG00000023445,ENSG00000027869,ENSG00000046774,ENSG00000054690,ENSG00000064201,ENSG00000069764,ENSG00000070526,ENSG00000079385,ENSG00000081985,ENSG00000087085,ENSG00000088320,ENSG00000091879,ENSG00000092929,ENSG00000095370,ENSG00000099260,ENSG00000100055,ENSG00000100060,ENSG00000101203,ENSG00000101292,ENSG00000101542…	CAMK1G,PLEKHG6,IL32,GIPR,STAB1,BIRC3,SH2D2A,MAGEC2,PLEKHH1,TSPAN32,PLA2G10,ST6GALNAC1,CEACAM1,IL12RB2,ACHE,REM1,ANGPT2,UNC13D,SH2D3C,PALMD,CYTH4,MFNG,COL20A1,PROKR2,CDH20,RNF125,TMC5,KCNA7,CKM,OVOL3,TJP3,HAS1,GHRHR,ZNF862,TNFSF8,ACTA2,P2RX1,GABRA4,OAS2,UNC93A,AADAC,IL1A,TSPAN1,PROX2,IFIT3,IFIT2,LRP11,PAEP,NFE2,G0S2,INHA,GCNT7,ZBP1,IL1B,BEST3,MCHR1,KLK14,AANAT,KRT34,TNS4,LIN28A,SYT4,PLAAT4,IRAK2,P…
UP	Factor: B-ATF; motif: NNATGACACN	0.0090875	2.04156	8921	457	243	0.531729	0.0272391	TF:M11300	TF	19943	458	TF:M00000	ENSG00000008323,ENSG00000008517,ENSG00000010310,ENSG00000010327,ENSG00000027869,ENSG00000039987,ENSG00000042832,ENSG00000046774,ENSG00000050344,ENSG00000052344,ENSG00000054690,ENSG00000056558,ENSG00000064201,ENSG00000068976,ENSG00000070526,ENSG00000073737,ENSG00000079385,ENSG00000081985,ENSG00000087085,ENSG00000091592,ENSG00000091879,ENSG00000095370,ENSG00000095464,ENSG00000099260,ENSG00000100079…	PLEKHG6,IL32,GIPR,STAB1,SH2D2A,BEST2,TG,MAGEC2,NFE2L3,PRSS8,PLEKHH1,TRAF1,TSPAN32,PYGM,ST6GALNAC1,DHRS9,CEACAM1,IL12RB2,ACHE,NLRP1,ANGPT2,SH2D3C,PDE6C,PALMD,LGALS2,BIK,APOBEC3H,HNF4A,PROKR2,RNF125,CKM,RSPH6A,OVOL3,TJP3,HAS1,GHRHR,ZNF862,P2RX1,OAS2,ARHGDIB,UNC93A,AADAC,GALNT3,PLCD4,ELAPOR1,TSPAN1,INSL4,TTLL2,TNFRSF8,CCRL2,TMEM156,OBP2A,NFE2,G0S2,INHA,GCNT7,PI3,ZBP1,RAB17,IL1B,OMG,LOC101927057,TSPA…
UP	Factor: RORA; motif: CCYTGNCCTN	0.00117207	2.93105	8074	457	231	0.50547	0.0286104	TF:M12659	TF	19943	7294	TF:M00000	ENSG00000008517,ENSG00000010310,ENSG00000010327,ENSG00000014257,ENSG00000019505,ENSG00000027869,ENSG00000039987,ENSG00000052344,ENSG00000053438,ENSG00000060656,ENSG00000064201,ENSG00000064205,ENSG00000068976,ENSG00000070526,ENSG00000073350,ENSG00000079385,ENSG00000087085,ENSG00000088320,ENSG00000091592,ENSG00000091879,ENSG00000092929,ENSG00000095370,ENSG00000100060,ENSG00000100079,ENSG00000100298…	IL32,GIPR,STAB1,ACP3,SYT13,SH2D2A,BEST2,PRSS8,NNAT,PTPRU,TSPAN32,CCN5,PYGM,ST6GALNAC1,LLGL2,CEACAM1,ACHE,REM1,NLRP1,ANGPT2,UNC13D,SH2D3C,MFNG,LGALS2,APOBEC3H,SLC10A1,COL20A1,PROKR2,RNF125,ASB9,KCNA7,CKM,RSPH6A,OVOL3,ZNF862,ACTA2,IL1A,GALNT3,ACTL8,TSPAN1,NR4A3,IFIT3,IFIT2,SFRP5,LRP11,TTLL2,LRAT,CCRL2,TMEM156,PAEP,OBP2A,NFE2,PI3,ZBP1,GPR18,IL1B,BBOX1,KLK14,FOXJ1,AANAT,IQCN,TMEM204,ANGPTL3,LGALS12,P…
UP	Factor: TWIST; motif: CACCTGG	0.0330313	1.48107	8509	457	228	0.498906	0.0267952	TF:M03582	TF	19943	8844	TF:M00000	ENSG00000008118,ENSG00000008323,ENSG00000010327,ENSG00000019505,ENSG00000023445,ENSG00000027869,ENSG00000039987,ENSG00000046774,ENSG00000052344,ENSG00000057468,ENSG00000060656,ENSG00000064195,ENSG00000064201,ENSG00000064205,ENSG00000068976,ENSG00000069764,ENSG00000073350,ENSG00000073737,ENSG00000087085,ENSG00000091592,ENSG00000095370,ENSG00000095464,ENSG00000099812,ENSG00000099937,ENSG00000100060…	CAMK1G,PLEKHG6,STAB1,SYT13,BIRC3,SH2D2A,BEST2,MAGEC2,PRSS8,MSH4,PTPRU,DLX3,TSPAN32,CCN5,PYGM,PLA2G10,LLGL2,DHRS9,ACHE,NLRP1,SH2D3C,PDE6C,MISP,SERPIND1,MFNG,LGALS2,BIK,SLC10A1,HNF4A,COL20A1,RNF125,PLLP,RHOV,RSPH6A,OVOL3,TJP3,TNFSF8,ACTA2,FOLR1,ARHGDIB,UNC93A,GALNT3,ELAPOR1,PROX2,SFRP5,INSL4,LRP11,TNFRSF8,CCRL2,TMEM156,PAEP,OBP2A,NFE2,INHA,ZBP1,RAB17,IL1B,OMG,LOC101927057,ADGRE2,APOL3,MCHR1,TMEM204…
UP	multicellular organismal process	9.67711e-11	10.0143	7463	424	226	0.533019	0.0302827	GO:0032501	GO:BP	21092	8794	GO:0008150	ENSG00000001626,ENSG00000008517,ENSG00000010310,ENSG00000010327,ENSG00000014257,ENSG00000023445,ENSG00000027869,ENSG00000039987,ENSG00000042832,ENSG00000053438,ENSG00000057468,ENSG00000064195,ENSG00000064201,ENSG00000069431,ENSG00000069764,ENSG00000077984,ENSG00000079385,ENSG00000081985,ENSG00000087085,ENSG00000091592,ENSG00000091879,ENSG00000095464,ENSG00000099937,ENSG00000100060,ENSG00000100290…	CFTR,IL32,GIPR,STAB1,ACP3,BIRC3,SH2D2A,BEST2,TG,NNAT,MSH4,DLX3,TSPAN32,ABCC9,PLA2G10,CST7,CEACAM1,IL12RB2,ACHE,NLRP1,ANGPT2,PDE6C,SERPIND1,MFNG,BIK,HNF4A,RNF125,GPR143,PLLP,RSPH6A,TJP3,GHRHR,TNFSF8,ACTA2,P2RX1,GABRA4,FOLR1,OAS2,ARHGDIB,IL1A,GALNT3,HSD11B1,NR4A3,PROX2,SFRP5,LRP11,TNFRSF8,LRAT,PAEP,OBP2A,COL10A1,G0S2,INHA,PI3,RAB17,GPR18,IL1B,OMG,LOC101927057,TSPAN8,TNFRSF19,MCHR1,KLK14,FOXJ1,TMEM2…
UP	Factor: ATF3; motif: GRTGACKCA	0.000171751	3.7651	7517	457	225	0.492341	0.0299322	TF:M12582	TF	19943	308	TF:M00000	ENSG00000008118,ENSG00000008517,ENSG00000010310,ENSG00000010327,ENSG00000023445,ENSG00000042832,ENSG00000046774,ENSG00000052344,ENSG00000060656,ENSG00000069431,ENSG00000069764,ENSG00000073737,ENSG00000077984,ENSG00000079385,ENSG00000091879,ENSG00000099812,ENSG00000099937,ENSG00000100055,ENSG00000100079,ENSG00000101076,ENSG00000101203,ENSG00000101695,ENSG00000102048,ENSG00000104879,ENSG00000105261…	CAMK1G,IL32,GIPR,STAB1,BIRC3,TG,MAGEC2,PRSS8,PTPRU,ABCC9,PLA2G10,DHRS9,CST7,CEACAM1,ANGPT2,MISP,SERPIND1,CYTH4,LGALS2,HNF4A,COL20A1,RNF125,ASB9,CKM,OVOL3,TJP3,HAS1,OGN,TNFSF8,RNF43,FOLR1,OAS2,ARHGDIB,IL1A,GALNT3,PLCD4,ANGPTL1,ELAPOR1,PROX2,IFIT3,IFIT2,INSL4,LRP11,TNFRSF8,LRAT,CCRL2,TMEM156,PAEP,NFE2,INHA,GCNT7,ZBP1,RAB17,OMG,LOC101927057,TSPAN8,ADGRE2,MCHR1,BBOX1,KLK14,IQCN,KRT34,TNS4,LIN28A,SYT4…
UP	Factor: AP-2; motif: NNGCCTK	0.0230296	1.63771	7883	457	215	0.47046	0.0272739	TF:M01859	TF	19943	142	TF:M00000	ENSG00000008118,ENSG00000008517,ENSG00000010310,ENSG00000023445,ENSG00000027869,ENSG00000039987,ENSG00000042832,ENSG00000046774,ENSG00000053438,ENSG00000064195,ENSG00000064205,ENSG00000068976,ENSG00000077984,ENSG00000081985,ENSG00000091879,ENSG00000099260,ENSG00000099812,ENSG00000100079,ENSG00000100298,ENSG00000100652,ENSG00000101542,ENSG00000101695,ENSG00000104140,ENSG00000105261,ENSG00000105289…	CAMK1G,IL32,GIPR,BIRC3,SH2D2A,BEST2,TG,MAGEC2,NNAT,DLX3,CCN5,PYGM,CST7,IL12RB2,ANGPT2,PALMD,MISP,LGALS2,APOBEC3H,SLC10A1,CDH20,RNF125,RHOV,OVOL3,TJP3,HAS1,GHRHR,OGN,TNFSF8,FOLR1,OAS2,ARHGDIB,IL1A,GALNT3,KCNJ13,PLCD4,ACTL8,TSPAN1,NR4A3,PROX2,INSL4,LRP11,LRAT,PAEP,NFE2,COL10A1,G0S2,INHA,ZBP1,RAB17,OMG,LOC101927057,TSPAN8,MCHR1,AANAT,KRT34,TNS4,SYT4,LGALS12,PLAAT4,IRAK2,RSAD2,IL15RA,TCN1,GARIN1B,AMH…
UP	Factor: Zbtb44; motif: CKGTGA; match class: 1	0.000584143	3.23348	7214	457	213	0.466083	0.0295259	TF:M05405_1	TF	19943	9155	TF:M05405	ENSG00000001626,ENSG00000008118,ENSG00000008323,ENSG00000008517,ENSG00000010310,ENSG00000010327,ENSG00000014257,ENSG00000019505,ENSG00000027869,ENSG00000039987,ENSG00000042832,ENSG00000056558,ENSG00000057468,ENSG00000064195,ENSG00000064201,ENSG00000064205,ENSG00000068976,ENSG00000069431,ENSG00000070526,ENSG00000077984,ENSG00000079385,ENSG00000081985,ENSG00000087085,ENSG00000088320,ENSG00000092929…	CFTR,CAMK1G,PLEKHG6,IL32,GIPR,STAB1,ACP3,SYT13,SH2D2A,BEST2,TG,TRAF1,MSH4,DLX3,TSPAN32,CCN5,PYGM,ABCC9,ST6GALNAC1,CST7,CEACAM1,IL12RB2,ACHE,REM1,UNC13D,MFNG,HNF4A,COL20A1,PROKR2,GPR143,TMC5,KCNA7,CKM,RSPH6A,OVOL3,TJP3,GHRHR,P2RX1,FOLR1,OAS2,ARHGDIB,UNC93A,PLCD4,ACTL8,TSPAN1,NR4A3,PROX2,LRP11,TTLL2,LRAT,CCRL2,PAEP,NFE2,COL10A1,GCNT7,PI3,ZBP1,RAB17,OMG,LOC101927057,ADGRE2,TNFRSF19,APOL3,MCHR1,AANAT…
UP	Factor: Lyl-1; motif: NCAKCTGYTNYCNN; match class: 1	0.0182698	1.73827	7716	457	212	0.463895	0.0274754	TF:M09977_1	TF	19943	4839	TF:M09977	ENSG00000008118,ENSG00000008323,ENSG00000008517,ENSG00000010327,ENSG00000019505,ENSG00000023445,ENSG00000046774,ENSG00000050344,ENSG00000052344,ENSG00000064201,ENSG00000069431,ENSG00000069764,ENSG00000081985,ENSG00000087085,ENSG00000088320,ENSG00000089101,ENSG00000091879,ENSG00000092929,ENSG00000095370,ENSG00000100055,ENSG00000100060,ENSG00000100298,ENSG00000101076,ENSG00000101203,ENSG00000101292…	CAMK1G,PLEKHG6,IL32,STAB1,SYT13,BIRC3,MAGEC2,NFE2L3,PRSS8,TSPAN32,ABCC9,PLA2G10,IL12RB2,ACHE,REM1,CFAP61,ANGPT2,UNC13D,SH2D3C,CYTH4,MFNG,APOBEC3H,HNF4A,COL20A1,PROKR2,CDH20,RNF125,KCNA7,CKM,RSPH6A,OVOL3,TJP3,GHRHR,P2RX1,FOLR1,OAS2,AADAC,ANGPTL1,NR4A3,PROX2,INSL4,TTLL2,CCRL2,PAEP,OBP2A,NFE2,INHA,PI3,ZBP1,RAB17,TSPAN8,BEST3,ADGRE2,APOL3,MCHR1,KLK14,FOXJ1,IQCN,KRT34,SYT4,LGALS12,PTPN22,RSAD2,IL15RA,…
UP	Factor: NF-E2; motif: TGCTGAGTCAY	0.000101122	3.99515	6658	457	207	0.452954	0.0310904	TF:M00037	TF	19943	5650	TF:M00000	ENSG00000010310,ENSG00000027869,ENSG00000046774,ENSG00000068976,ENSG00000069431,ENSG00000069764,ENSG00000077984,ENSG00000079385,ENSG00000088320,ENSG00000091879,ENSG00000099812,ENSG00000099937,ENSG00000100055,ENSG00000100060,ENSG00000100298,ENSG00000101203,ENSG00000101292,ENSG00000101850,ENSG00000102048,ENSG00000104848,ENSG00000105289,ENSG00000105509,ENSG00000106479,ENSG00000106809,ENSG00000106952…	GIPR,SH2D2A,MAGEC2,PYGM,ABCC9,PLA2G10,CST7,CEACAM1,REM1,ANGPT2,MISP,SERPIND1,CYTH4,MFNG,APOBEC3H,COL20A1,PROKR2,GPR143,ASB9,KCNA7,TJP3,HAS1,ZNF862,OGN,TNFSF8,RNF43,FOLR1,OAS2,ARHGDIB,AADAC,IL1A,ACTL8,PROX2,IFIT3,IFIT2,INSL4,TTLL2,TNFRSF8,CCRL2,PAEP,OBP2A,NFE2,INHA,ZBP1,RAB17,OMG,LOC101927057,ADGRE2,TNFRSF19,APOL3,MCHR1,BBOX1,KLK14,FOXJ1,IQCN,KRT34,LIN28A,SYT4,LGALS12,PLAAT4,PTPN22,RSAD2,IL15RA,TC…
UP	cell periphery	6.22919e-11	10.2056	6270	453	204	0.450331	0.0325359	GO:0071944	GO:CC	21690	3125	GO:0110165	ENSG00000001626,ENSG00000008118,ENSG00000008323,ENSG00000010310,ENSG00000010327,ENSG00000014257,ENSG00000019505,ENSG00000039987,ENSG00000052344,ENSG00000056558,ENSG00000060656,ENSG00000064201,ENSG00000064205,ENSG00000069431,ENSG00000073350,ENSG00000079385,ENSG00000081985,ENSG00000087085,ENSG00000088320,ENSG00000091879,ENSG00000095370,ENSG00000095464,ENSG00000099812,ENSG00000100055,ENSG00000100652…	CFTR,CAMK1G,PLEKHG6,GIPR,STAB1,ACP3,SYT13,BEST2,PRSS8,TRAF1,PTPRU,TSPAN32,CCN5,ABCC9,LLGL2,CEACAM1,IL12RB2,ACHE,REM1,ANGPT2,SH2D3C,PDE6C,MISP,CYTH4,SLC10A1,COL20A1,PROKR2,CDH20,GPR143,TMC5,RHOV,KCNA7,TJP3,HAS1,GHRHR,OGN,TNFSF8,RNF43,P2RX1,GABRA4,FOLR1,UNC93A,IL1A,KCNJ13,PLCD4,ANGPTL1,ELAPOR1,TSPAN1,LRP11,TNFRSF8,CCRL2,COL10A1,INHA,PI3,RAB17,GPR18,OMG,LOC101927057,TSPAN8,BEST3,ADGRE2,TNFRSF19,MCHR…
UP	Factor: ZNF644; motif: TCCWGCCTCTSN	0.0383266	1.4165	7340	457	200	0.437637	0.027248	TF:M09737	TF	19943	10848	TF:M00000	ENSG00000008323,ENSG00000008517,ENSG00000010310,ENSG00000010327,ENSG00000027869,ENSG00000039987,ENSG00000042832,ENSG00000046774,ENSG00000050344,ENSG00000057468,ENSG00000064195,ENSG00000064201,ENSG00000068976,ENSG00000073350,ENSG00000088320,ENSG00000091592,ENSG00000092929,ENSG00000095370,ENSG00000095464,ENSG00000099260,ENSG00000099937,ENSG00000100055,ENSG00000100290,ENSG00000100298,ENSG00000101076…	PLEKHG6,IL32,GIPR,STAB1,SH2D2A,BEST2,TG,MAGEC2,NFE2L3,MSH4,DLX3,TSPAN32,PYGM,LLGL2,REM1,NLRP1,UNC13D,SH2D3C,PDE6C,PALMD,SERPIND1,CYTH4,BIK,APOBEC3H,HNF4A,COL20A1,PROKR2,CDH20,RNF125,GPR143,PLLP,TMC5,RSPH6A,OVOL3,HAS1,P2RX1,GABRA4,OAS2,ARHGDIB,GALNT3,ANGPTL1,TSPAN1,PROX2,SFRP5,MYCT1,TNFRSF8,CCRL2,NFE2,G0S2,PI3,TSPAN8,TNFRSF19,APOL3,MCHR1,KLK14,AANAT,TMEM204,TNS4,LIN28A,LGALS12,PLAAT4,IRAK2,IL15RA,…
UP	Factor: myogenin; motif: RGCAGSTG	0.0112925	1.94721	7044	457	198	0.43326	0.028109	TF:M00712	TF	19943	5450	TF:M00000	ENSG00000008323,ENSG00000008517,ENSG00000019505,ENSG00000039987,ENSG00000046774,ENSG00000050344,ENSG00000052344,ENSG00000054690,ENSG00000064201,ENSG00000064205,ENSG00000068976,ENSG00000070526,ENSG00000077984,ENSG00000087085,ENSG00000088320,ENSG00000089101,ENSG00000091592,ENSG00000095370,ENSG00000099812,ENSG00000100060,ENSG00000100298,ENSG00000101076,ENSG00000101203,ENSG00000101292,ENSG00000104140…	PLEKHG6,IL32,SYT13,BEST2,MAGEC2,NFE2L3,PRSS8,PLEKHH1,TSPAN32,CCN5,PYGM,ST6GALNAC1,CST7,ACHE,REM1,CFAP61,NLRP1,SH2D3C,MISP,MFNG,APOBEC3H,HNF4A,COL20A1,PROKR2,RHOV,CKM,RSPH6A,TJP3,GHRHR,P2RX1,OAS2,GALNT3,ANGPTL1,TSPAN1,IFIT2,SFRP5,LRP11,TTLL2,LRAT,CCRL2,OBP2A,NFE2,G0S2,INHA,PI3,ZBP1,IL1B,TSPAN8,BEST3,ADGRE2,APOL3,MCHR1,KLK14,FOXJ1,AANAT,IQCN,TMEM204,KRT34,SYT4,LGALS12,PLAAT4,IRAK2,IL15RA,TCN1,C5AR2…
UP	Factor: Ikaros; motif: TGGGAGN; match class: 1	0.0398957	1.39907	7263	457	198	0.43326	0.0272615	TF:M07260_1	TF	19943	4221	TF:M07260	ENSG00000008118,ENSG00000008323,ENSG00000008517,ENSG00000010310,ENSG00000010327,ENSG00000014257,ENSG00000019505,ENSG00000027869,ENSG00000039987,ENSG00000046774,ENSG00000052344,ENSG00000057468,ENSG00000068976,ENSG00000069764,ENSG00000070526,ENSG00000073737,ENSG00000087085,ENSG00000088320,ENSG00000091879,ENSG00000095370,ENSG00000099812,ENSG00000099937,ENSG00000100079,ENSG00000100298,ENSG00000101076…	CAMK1G,PLEKHG6,IL32,GIPR,STAB1,ACP3,SYT13,SH2D2A,BEST2,MAGEC2,PRSS8,MSH4,PYGM,PLA2G10,ST6GALNAC1,DHRS9,ACHE,REM1,ANGPT2,SH2D3C,MISP,SERPIND1,LGALS2,APOBEC3H,HNF4A,COL20A1,RNF125,GPR143,PLLP,TMC5,RHOV,CKM,OVOL3,TJP3,ZNF862,ACTA2,FOLR1,OAS2,TSPAN1,HSD11B1,PROX2,IFIT3,SFRP5,MYCT1,TNFRSF8,TMEM156,PAEP,NFE2,INHA,ZBP1,RAB17,BEST3,APOL3,KLK14,IQCN,TMEM204,KRT34,TNS4,LIN28A,LGALS12,PLAAT4,IRAK2,PTPN22,C5…
UP	cellular response to stimulus	0.000532656	3.27355	7494	424	196	0.462264	0.0261543	GO:0051716	GO:BP	21092	16044	GO:0009987,GO:0050896	ENSG00000001626,ENSG00000008323,ENSG00000008517,ENSG00000010310,ENSG00000014257,ENSG00000019505,ENSG00000023445,ENSG00000027869,ENSG00000042832,ENSG00000050344,ENSG00000056558,ENSG00000057468,ENSG00000060656,ENSG00000064195,ENSG00000064201,ENSG00000064205,ENSG00000069764,ENSG00000073350,ENSG00000079385,ENSG00000081985,ENSG00000087085,ENSG00000091592,ENSG00000091879,ENSG00000095370,ENSG00000095464…	CFTR,PLEKHG6,IL32,GIPR,ACP3,SYT13,BIRC3,SH2D2A,TG,NFE2L3,TRAF1,MSH4,PTPRU,DLX3,TSPAN32,CCN5,PLA2G10,LLGL2,CEACAM1,IL12RB2,ACHE,NLRP1,ANGPT2,SH2D3C,PDE6C,CYTH4,MFNG,BIK,SLC10A1,HNF4A,PROKR2,RNF125,GPR143,ASB9,RHOV,HAS1,GHRHR,OGN,TNFSF8,ACTA2,RNF43,P2RX1,GABRA4,FOLR1,OAS2,ARHGDIB,AADAC,IL1A,GALNT3,PLCD4,ANGPTL1,ELAPOR1,NR4A3,IFIT3,IFIT2,SFRP5,INSL4,TNFRSF8,LRAT,CCRL2,NFE2,G0S2,INHA,ZBP1,GPR18,IL1B,…
UP	Factor: c-Maf; motif: NWNNNTGCTGACKNNNNNN	0.00271916	2.56556	6645	457	194	0.424508	0.0291949	TF:M01070	TF	19943	878	TF:M00000	ENSG00000001626,ENSG00000008517,ENSG00000010310,ENSG00000014257,ENSG00000039987,ENSG00000046774,ENSG00000054690,ENSG00000056558,ENSG00000057468,ENSG00000064201,ENSG00000064205,ENSG00000068976,ENSG00000073350,ENSG00000073737,ENSG00000077984,ENSG00000079385,ENSG00000089101,ENSG00000091592,ENSG00000095370,ENSG00000099260,ENSG00000099812,ENSG00000099937,ENSG00000100055,ENSG00000101076,ENSG00000102048…	CFTR,IL32,GIPR,ACP3,BEST2,MAGEC2,PLEKHH1,TRAF1,MSH4,TSPAN32,CCN5,PYGM,LLGL2,DHRS9,CST7,CEACAM1,CFAP61,NLRP1,SH2D3C,PALMD,MISP,SERPIND1,CYTH4,HNF4A,ASB9,CKM,RSPH6A,HAS1,ZNF862,OGN,ACTA2,RNF43,OAS2,ARHGDIB,IL1A,PLCD4,ACTL8,TSPAN1,PROX2,MYCT1,TTLL2,CCRL2,PAEP,INHA,GCNT7,ZBP1,GPR18,OMG,LOC101927057,BEST3,ADGRE2,TNFRSF19,APOL3,BBOX1,KLK14,FOXJ1,TMEM204,TNS4,LGALS12,PLAAT4,PTPN22,RSAD2,AMHR2,KRT7,HTR2B…
UP	Factor: MafG; motif: CMATGACTCAGCAGA	0.0382364	1.41752	7002	457	192	0.420131	0.0274207	TF:M07048	TF	19943	4922	TF:M00000	ENSG00000008323,ENSG00000008517,ENSG00000010310,ENSG00000010327,ENSG00000019505,ENSG00000027869,ENSG00000039987,ENSG00000056558,ENSG00000064201,ENSG00000064205,ENSG00000068976,ENSG00000077984,ENSG00000079385,ENSG00000081985,ENSG00000089101,ENSG00000091592,ENSG00000092929,ENSG00000099937,ENSG00000100055,ENSG00000100060,ENSG00000100298,ENSG00000101292,ENSG00000101542,ENSG00000102048,ENSG00000103534…	PLEKHG6,IL32,GIPR,STAB1,SYT13,SH2D2A,BEST2,TRAF1,TSPAN32,CCN5,PYGM,CST7,CEACAM1,IL12RB2,CFAP61,NLRP1,UNC13D,SERPIND1,CYTH4,MFNG,APOBEC3H,PROKR2,CDH20,ASB9,TMC5,TJP3,HAS1,GHRHR,ZNF862,OGN,TNFSF8,RNF43,P2RX1,GABRA4,FOLR1,OAS2,IL1A,GALNT3,KCNJ13,ACTL8,IFIT3,INSL4,CCRL2,PAEP,RAB17,TSPAN8,ADGRE2,APOL3,MCHR1,BBOX1,FOXJ1,TMEM204,KRT34,TNS4,LIN28A,SYT4,PLAAT4,IL15RA,GARIN1B,AMHR2,SCEL,DDX60,BTG4,MMP13,TR…
UP	Factor: NMYC; motif: CAYCTG; match class: 1	0.000296504	3.52797	6180	457	190	0.415755	0.0307443	TF:M01808_1	TF	19943	5889	TF:M01808	ENSG00000008118,ENSG00000010310,ENSG00000023445,ENSG00000042832,ENSG00000046774,ENSG00000050344,ENSG00000053438,ENSG00000056558,ENSG00000060656,ENSG00000064201,ENSG00000069764,ENSG00000081985,ENSG00000088320,ENSG00000091592,ENSG00000092929,ENSG00000095370,ENSG00000095464,ENSG00000099937,ENSG00000100055,ENSG00000100079,ENSG00000100298,ENSG00000101076,ENSG00000101203,ENSG00000102048,ENSG00000105261…	CAMK1G,GIPR,BIRC3,TG,MAGEC2,NFE2L3,NNAT,TRAF1,PTPRU,TSPAN32,PLA2G10,IL12RB2,REM1,NLRP1,UNC13D,SH2D3C,PDE6C,SERPIND1,CYTH4,LGALS2,APOBEC3H,HNF4A,COL20A1,ASB9,OVOL3,TJP3,HAS1,ZNF862,TNFSF8,ACTA2,OAS2,UNC93A,AADAC,ANGPTL1,HSD11B1,IFIT3,TTLL2,COL10A1,INHA,PI3,RAB17,IL1B,OMG,LOC101927057,ADGRE2,APOL3,AANAT,KRT34,LIN28A,PLAAT4,PTPN22,C5AR2,OASL,AMHR2,KRT7,SCEL,TRIM29,TRIM54,MYPN,ITGB7,KRT71,PSTPIP1,IGS…
UP	plasma membrane	1.04056e-09	8.98273	5788	453	187	0.412804	0.0323082	GO:0005886	GO:CC	21690	513	GO:0016020,GO:0071944	ENSG00000001626,ENSG00000008118,ENSG00000008323,ENSG00000010310,ENSG00000010327,ENSG00000014257,ENSG00000019505,ENSG00000039987,ENSG00000052344,ENSG00000056558,ENSG00000060656,ENSG00000064201,ENSG00000069431,ENSG00000073350,ENSG00000079385,ENSG00000081985,ENSG00000087085,ENSG00000088320,ENSG00000091879,ENSG00000095370,ENSG00000095464,ENSG00000099812,ENSG00000100055,ENSG00000100652,ENSG00000101292…	CFTR,CAMK1G,PLEKHG6,GIPR,STAB1,ACP3,SYT13,BEST2,PRSS8,TRAF1,PTPRU,TSPAN32,ABCC9,LLGL2,CEACAM1,IL12RB2,ACHE,REM1,ANGPT2,SH2D3C,PDE6C,MISP,CYTH4,SLC10A1,PROKR2,CDH20,GPR143,TMC5,RHOV,KCNA7,TJP3,HAS1,GHRHR,TNFSF8,RNF43,P2RX1,GABRA4,FOLR1,UNC93A,IL1A,KCNJ13,PLCD4,ELAPOR1,TSPAN1,LRP11,TNFRSF8,CCRL2,INHA,PI3,RAB17,GPR18,OMG,LOC101927057,TSPAN8,BEST3,ADGRE2,TNFRSF19,MCHR1,TMEM204,SYT4,IRAK2,PTPN22,IL15R…
UP	Factor: MAFA; motif: TCAGCAN	0.00422203	2.37448	6379	457	186	0.407002	0.0291582	TF:M01709	TF	19943	4852	TF:M00000	ENSG00000010327,ENSG00000019505,ENSG00000027869,ENSG00000046774,ENSG00000050344,ENSG00000054690,ENSG00000057468,ENSG00000064195,ENSG00000064205,ENSG00000073737,ENSG00000077984,ENSG00000079385,ENSG00000092929,ENSG00000095370,ENSG00000099812,ENSG00000100298,ENSG00000101203,ENSG00000102048,ENSG00000104879,ENSG00000105509,ENSG00000106479,ENSG00000106809,ENSG00000106952,ENSG00000107796,ENSG00000108375…	STAB1,SYT13,SH2D2A,MAGEC2,NFE2L3,PLEKHH1,MSH4,DLX3,CCN5,DHRS9,CST7,CEACAM1,UNC13D,SH2D3C,MISP,APOBEC3H,COL20A1,ASB9,CKM,HAS1,ZNF862,OGN,TNFSF8,ACTA2,RNF43,OAS2,ARHGDIB,GALNT3,KCNJ13,ANGPTL1,ACTL8,HSD11B1,PROX2,IFIT2,SFRP5,INSL4,TTLL2,CCRL2,OBP2A,INHA,ZBP1,RAB17,BEST3,TNFRSF19,APOL3,MCHR1,KLK14,TMEM204,KRT34,TNS4,SYT4,LGALS12,PLAAT4,C5AR2,AMHR2,KRT7,HTR2B,SCEL,IL10,BAAT,MMP13,IFI44,TRIM54,ACVRL1,I…
UP	intrinsic component of membrane	1.8494e-08	7.73297	5902	453	185	0.408389	0.0313453	GO:0031224	GO:CC	21690	1234	GO:0016020,GO:0110165	ENSG00000001626,ENSG00000010310,ENSG00000010327,ENSG00000014257,ENSG00000019505,ENSG00000039987,ENSG00000052344,ENSG00000053438,ENSG00000060656,ENSG00000064201,ENSG00000069431,ENSG00000070526,ENSG00000073737,ENSG00000079385,ENSG00000081985,ENSG00000087085,ENSG00000089101,ENSG00000100060,ENSG00000100290,ENSG00000100652,ENSG00000101292,ENSG00000101542,ENSG00000101850,ENSG00000102934,ENSG00000103534…	CFTR,GIPR,STAB1,ACP3,SYT13,BEST2,PRSS8,NNAT,PTPRU,TSPAN32,ABCC9,ST6GALNAC1,DHRS9,CEACAM1,IL12RB2,ACHE,CFAP61,MFNG,BIK,SLC10A1,PROKR2,CDH20,GPR143,PLLP,TMC5,KCNA7,HAS1,GHRHR,TNFSF8,RNF43,P2RX1,GABRA4,FOLR1,UNC93A,AADAC,GALNT3,KCNJ13,ELAPOR1,TSPAN1,HSD11B1,LRP11,MYCT1,TNFRSF8,LRAT,CCRL2,TMEM156,GCNT7,GPR18,OMG,LOC101927057,TSPAN8,BEST3,ADGRE2,TNFRSF19,MCHR1,TMEM204,SYT4,PLAAT4,IL15RA,C5AR2,AMHR2,HT…
UP	Factor: Smad2; motif: TGTCTGNCWCCT	0.00334878	2.47511	6304	457	185	0.404814	0.0293464	TF:M10059	TF	19943	7574	TF:M00000	ENSG00000008118,ENSG00000008323,ENSG00000008517,ENSG00000010310,ENSG00000010327,ENSG00000014257,ENSG00000023445,ENSG00000027869,ENSG00000039987,ENSG00000042832,ENSG00000046774,ENSG00000050344,ENSG00000052344,ENSG00000054690,ENSG00000056558,ENSG00000057468,ENSG00000064195,ENSG00000064205,ENSG00000068976,ENSG00000069764,ENSG00000087085,ENSG00000088320,ENSG00000089101,ENSG00000091879,ENSG00000092929…	CAMK1G,PLEKHG6,IL32,GIPR,STAB1,ACP3,BIRC3,SH2D2A,BEST2,TG,MAGEC2,NFE2L3,PRSS8,PLEKHH1,TRAF1,MSH4,DLX3,CCN5,PYGM,PLA2G10,ACHE,REM1,CFAP61,ANGPT2,UNC13D,SH2D3C,PALMD,MISP,CYTH4,APOBEC3H,HNF4A,COL20A1,RHOV,KCNA7,CKM,GHRHR,ZNF862,GABRA4,FOLR1,OAS2,IL1A,GALNT3,PLCD4,ANGPTL1,ELAPOR1,NR4A3,INHA,GCNT7,IL1B,OMG,LOC101927057,BEST3,ADGRE2,MCHR1,KLK14,FOXJ1,LIN28A,LGALS12,PLAAT4,IRAK2,PTPN22,RSAD2,AMHR2,KRT7…
UP	Factor: ATF-4; motif: GGATGATGTCATCC	0.00681276	2.16668	6421	457	185	0.404814	0.0288117	TF:M11334	TF	19943	324	TF:M00000	ENSG00000001626,ENSG00000008517,ENSG00000010310,ENSG00000014257,ENSG00000019505,ENSG00000054690,ENSG00000060656,ENSG00000064205,ENSG00000070526,ENSG00000077984,ENSG00000081985,ENSG00000087085,ENSG00000091592,ENSG00000095370,ENSG00000095464,ENSG00000100055,ENSG00000100079,ENSG00000100652,ENSG00000101542,ENSG00000102048,ENSG00000103534,ENSG00000104140,ENSG00000105261,ENSG00000105509,ENSG00000106809…	CFTR,IL32,GIPR,ACP3,SYT13,PLEKHH1,PTPRU,CCN5,ST6GALNAC1,CST7,IL12RB2,ACHE,NLRP1,SH2D3C,PDE6C,CYTH4,LGALS2,SLC10A1,CDH20,ASB9,TMC5,RHOV,OVOL3,HAS1,OGN,TNFSF8,ACTA2,RNF43,FOLR1,KCNJ13,ANGPTL1,TSPAN1,HSD11B1,PROX2,INSL4,TTLL2,LRAT,CCRL2,PAEP,COL10A1,INHA,GCNT7,PI3,RAB17,GPR18,BEST3,ADGRE2,TNFRSF19,MCHR1,BBOX1,KLK14,FOXJ1,TNS4,ANGPTL3,PLAAT4,PTPN22,OASL,GARIN1B,SCEL,RTP4,IL10,BAAT,BTG4,MMP13,IFI44L,A…
UP	Factor: ATF-3; motif: NATGATGTCATN	0.0090875	2.04156	6425	457	184	0.402626	0.0286381	TF:M11290	TF	19943	304	TF:M00000	ENSG00000001626,ENSG00000008517,ENSG00000010310,ENSG00000014257,ENSG00000039987,ENSG00000042832,ENSG00000050344,ENSG00000054690,ENSG00000060656,ENSG00000064205,ENSG00000069764,ENSG00000070526,ENSG00000079385,ENSG00000081985,ENSG00000087085,ENSG00000088320,ENSG00000091592,ENSG00000092929,ENSG00000095370,ENSG00000095464,ENSG00000099260,ENSG00000099937,ENSG00000100055,ENSG00000100079,ENSG00000100298…	CFTR,IL32,GIPR,ACP3,BEST2,TG,NFE2L3,PLEKHH1,PTPRU,CCN5,PLA2G10,ST6GALNAC1,CEACAM1,IL12RB2,ACHE,REM1,NLRP1,UNC13D,SH2D3C,PDE6C,PALMD,SERPIND1,CYTH4,LGALS2,APOBEC3H,CDH20,ASB9,TMC5,RHOV,KCNA7,OVOL3,TJP3,HAS1,GHRHR,TNFSF8,RNF43,FOLR1,UNC93A,IL1A,ANGPTL1,TSPAN1,HSD11B1,IFIT3,MYCT1,TTLL2,CCRL2,PAEP,COL10A1,INHA,GCNT7,PI3,RAB17,GPR18,BEST3,ADGRE2,TNFRSF19,APOL3,MCHR1,KLK14,FOXJ1,TNS4,PTPN22,IL15RA,TCN1…
UP	Factor: Smad2; motif: TGTCTGNCACCT	0.012351	1.9083	6474	457	184	0.402626	0.0284214	TF:M09656	TF	19943	7572	TF:M00000	ENSG00000008323,ENSG00000008517,ENSG00000010310,ENSG00000010327,ENSG00000014257,ENSG00000023445,ENSG00000039987,ENSG00000042832,ENSG00000046774,ENSG00000050344,ENSG00000054690,ENSG00000057468,ENSG00000064195,ENSG00000064201,ENSG00000064205,ENSG00000068976,ENSG00000069431,ENSG00000069764,ENSG00000073350,ENSG00000077984,ENSG00000087085,ENSG00000088320,ENSG00000089101,ENSG00000091879,ENSG00000095464…	PLEKHG6,IL32,GIPR,STAB1,ACP3,BIRC3,BEST2,TG,MAGEC2,NFE2L3,PLEKHH1,MSH4,DLX3,TSPAN32,CCN5,PYGM,ABCC9,PLA2G10,LLGL2,CST7,ACHE,REM1,CFAP61,ANGPT2,PDE6C,MISP,SERPIND1,APOBEC3H,HNF4A,RNF125,ASB9,KCNA7,CKM,RSPH6A,TJP3,GHRHR,ZNF862,ACTA2,FOLR1,OAS2,PLCD4,ANGPTL1,NR4A3,TNFRSF8,OBP2A,NFE2,INHA,GCNT7,PI3,GPR18,IL1B,ADGRE2,TNFRSF19,MCHR1,FOXJ1,KRT34,LIN28A,SYT4,LGALS12,PLAAT4,IRAK2,RSAD2,C5AR2,OASL,GARIN1B,…
UP	cell communication	5.99169e-05	4.22245	6551	424	181	0.426887	0.0276294	GO:0007154	GO:BP	21092	3050	GO:0009987	ENSG00000001626,ENSG00000008323,ENSG00000008517,ENSG00000010310,ENSG00000010327,ENSG00000014257,ENSG00000019505,ENSG00000023445,ENSG00000027869,ENSG00000042832,ENSG00000053438,ENSG00000056558,ENSG00000060656,ENSG00000064195,ENSG00000064201,ENSG00000064205,ENSG00000069764,ENSG00000073350,ENSG00000079385,ENSG00000081985,ENSG00000087085,ENSG00000091592,ENSG00000091879,ENSG00000095370,ENSG00000095464…	CFTR,PLEKHG6,IL32,GIPR,STAB1,ACP3,SYT13,BIRC3,SH2D2A,TG,NNAT,TRAF1,PTPRU,DLX3,TSPAN32,CCN5,PLA2G10,LLGL2,CEACAM1,IL12RB2,ACHE,NLRP1,ANGPT2,SH2D3C,PDE6C,CYTH4,MFNG,BIK,SLC10A1,HNF4A,PROKR2,RNF125,GPR143,ASB9,RHOV,GHRHR,OGN,TNFSF8,ACTA2,RNF43,P2RX1,GABRA4,FOLR1,OAS2,ARHGDIB,IL1A,GALNT3,PLCD4,ANGPTL1,ELAPOR1,NR4A3,SFRP5,INSL4,TNFRSF8,CCRL2,G0S2,INHA,ZBP1,GPR18,IL1B,ADGRE2,TNFRSF19,APOL3,MCHR1,KLK14,…
UP	developmental process	5.12341e-05	4.29044	6424	424	179	0.42217	0.0278643	GO:0032502	GO:BP	21092	8795	GO:0008150	ENSG00000001626,ENSG00000010310,ENSG00000010327,ENSG00000023445,ENSG00000027869,ENSG00000042832,ENSG00000053438,ENSG00000057468,ENSG00000060656,ENSG00000064195,ENSG00000069764,ENSG00000073737,ENSG00000077984,ENSG00000079385,ENSG00000087085,ENSG00000091879,ENSG00000092929,ENSG00000095464,ENSG00000099260,ENSG00000100060,ENSG00000100290,ENSG00000101076,ENSG00000101542,ENSG00000102934,ENSG00000104941…	CFTR,GIPR,STAB1,BIRC3,SH2D2A,TG,NNAT,MSH4,PTPRU,DLX3,PLA2G10,DHRS9,CST7,CEACAM1,ACHE,ANGPT2,UNC13D,PDE6C,PALMD,MFNG,BIK,HNF4A,CDH20,PLLP,RSPH6A,OVOL3,TJP3,GHRHR,TNFSF8,ACTA2,FOLR1,OAS2,ARHGDIB,IL1A,GALNT3,ACTL8,HSD11B1,NR4A3,PROX2,SFRP5,PAEP,COL10A1,INHA,RAB17,GPR18,IL1B,OMG,LOC101927057,TSPAN8,TNFRSF19,KLK14,FOXJ1,TMEM204,KRT34,LIN28A,ANGPTL3,SYT4,LGALS12,PLAAT4,PTPN22,RSAD2,IL15RA,GARIN1B,AMHR2…
UP	signaling	8.27335e-05	4.08232	6492	424	179	0.42217	0.0275724	GO:0023052	GO:BP	21092	7643	GO:0008150	ENSG00000001626,ENSG00000008323,ENSG00000008517,ENSG00000010310,ENSG00000010327,ENSG00000014257,ENSG00000019505,ENSG00000023445,ENSG00000027869,ENSG00000042832,ENSG00000053438,ENSG00000056558,ENSG00000060656,ENSG00000064195,ENSG00000064201,ENSG00000064205,ENSG00000069431,ENSG00000069764,ENSG00000073350,ENSG00000079385,ENSG00000081985,ENSG00000087085,ENSG00000091592,ENSG00000091879,ENSG00000095370…	CFTR,PLEKHG6,IL32,GIPR,STAB1,ACP3,SYT13,BIRC3,SH2D2A,TG,NNAT,TRAF1,PTPRU,DLX3,TSPAN32,CCN5,ABCC9,PLA2G10,LLGL2,CEACAM1,IL12RB2,ACHE,NLRP1,ANGPT2,SH2D3C,PDE6C,CYTH4,MFNG,BIK,SLC10A1,HNF4A,PROKR2,RNF125,GPR143,ASB9,RHOV,GHRHR,OGN,TNFSF8,ACTA2,RNF43,P2RX1,GABRA4,FOLR1,OAS2,ARHGDIB,IL1A,GALNT3,PLCD4,ANGPTL1,NR4A3,SFRP5,INSL4,TNFRSF8,CCRL2,G0S2,INHA,ZBP1,GPR18,IL1B,ADGRE2,TNFRSF19,APOL3,MCHR1,KLK14,TM…
UP	integral component of membrane	6.71921e-08	7.17268	5746	453	179	0.395143	0.0311521	GO:0016021	GO:CC	21690	849	GO:0031224	ENSG00000001626,ENSG00000010310,ENSG00000010327,ENSG00000014257,ENSG00000019505,ENSG00000039987,ENSG00000052344,ENSG00000053438,ENSG00000060656,ENSG00000064201,ENSG00000069431,ENSG00000070526,ENSG00000073737,ENSG00000079385,ENSG00000081985,ENSG00000087085,ENSG00000089101,ENSG00000100060,ENSG00000100290,ENSG00000100652,ENSG00000101292,ENSG00000101542,ENSG00000101850,ENSG00000102934,ENSG00000103534…	CFTR,GIPR,STAB1,ACP3,SYT13,BEST2,PRSS8,NNAT,PTPRU,TSPAN32,ABCC9,ST6GALNAC1,DHRS9,CEACAM1,IL12RB2,ACHE,CFAP61,MFNG,BIK,SLC10A1,PROKR2,CDH20,GPR143,PLLP,TMC5,KCNA7,HAS1,GHRHR,TNFSF8,RNF43,P2RX1,GABRA4,FOLR1,UNC93A,AADAC,GALNT3,KCNJ13,ELAPOR1,TSPAN1,HSD11B1,LRP11,MYCT1,TNFRSF8,LRAT,CCRL2,TMEM156,GCNT7,GPR18,TSPAN8,BEST3,ADGRE2,TNFRSF19,MCHR1,TMEM204,SYT4,PLAAT4,IL15RA,C5AR2,AMHR2,HTR2B,RTP4,ACVRL1,I…
UP	Factor: MAF; motif: NGCTGAGTCAN	0.00339758	2.46883	6061	457	179	0.391685	0.0295331	TF:M00983	TF	19943	4942	TF:M00000	ENSG00000010327,ENSG00000046774,ENSG00000069431,ENSG00000069764,ENSG00000092929,ENSG00000095370,ENSG00000095464,ENSG00000099260,ENSG00000099812,ENSG00000099937,ENSG00000100055,ENSG00000101076,ENSG00000101203,ENSG00000102048,ENSG00000105289,ENSG00000105509,ENSG00000106479,ENSG00000106809,ENSG00000108375,ENSG00000110195,ENSG00000111335,ENSG00000111348,ENSG00000115008,ENSG00000115339,ENSG00000119917…	STAB1,MAGEC2,ABCC9,PLA2G10,UNC13D,SH2D3C,PDE6C,PALMD,MISP,SERPIND1,CYTH4,HNF4A,COL20A1,ASB9,TJP3,HAS1,ZNF862,OGN,RNF43,FOLR1,OAS2,ARHGDIB,IL1A,GALNT3,IFIT3,IFIT2,SFRP5,LRP11,TNFRSF8,CCRL2,TMEM156,PAEP,NFE2,G0S2,INHA,RAB17,IL1B,OMG,LOC101927057,BEST3,ADGRE2,APOL3,BBOX1,KLK14,IQCN,KRT34,TNS4,LIN28A,LGALS12,PLAAT4,RSAD2,IL15RA,C5AR2,KRT7,SCEL,IL10,TRIM29,BTG4,MMP13,TRIM54,ACVRL1,PSTPIP1,ABCA8,VAV1,N…
UP	Factor: LF-A1; motif: GGGSTCWR; match class: 1	0.0342891	1.46484	6442	457	179	0.391685	0.0277864	TF:M00646_1	TF	19943	4665	TF:M00646	ENSG00000008323,ENSG00000008517,ENSG00000010327,ENSG00000019505,ENSG00000050344,ENSG00000052344,ENSG00000054690,ENSG00000056558,ENSG00000064205,ENSG00000068976,ENSG00000069431,ENSG00000070526,ENSG00000081985,ENSG00000088320,ENSG00000091592,ENSG00000092929,ENSG00000095370,ENSG00000099812,ENSG00000100060,ENSG00000100290,ENSG00000100298,ENSG00000101850,ENSG00000104140,ENSG00000104879,ENSG00000105289…	PLEKHG6,IL32,STAB1,SYT13,NFE2L3,PRSS8,PLEKHH1,TRAF1,CCN5,PYGM,ABCC9,ST6GALNAC1,IL12RB2,REM1,NLRP1,UNC13D,SH2D3C,MISP,MFNG,BIK,APOBEC3H,GPR143,RHOV,CKM,TJP3,HAS1,GHRHR,P2RX1,GABRA4,GALNT3,PLCD4,ACTL8,TSPAN1,PROX2,INSL4,CCRL2,PAEP,OBP2A,NFE2,G0S2,INHA,PI3,ZBP1,ADGRE2,APOL3,MCHR1,KLK14,FOXJ1,AANAT,TMEM204,SYT4,PLAAT4,IRAK2,RSAD2,GARIN1B,AMHR2,KRT7,TRIM29,BTG4,ACVRL1,ITGB7,KRT71,DUOXA1,PSTPIP1,VAV1,I…
[truncated: 2,776 more rows]
